# Supplementary material for: The Histone Chaperone Network Is Highly Conserved in Physarum polycephalum
Source: MDPI journal article supplement (doi:10.3390/ijms24021051), 2023-01-05
Supplement: s1 [file s1]

# Supplementary Material

## The Histone Chaperone Network is highly conserved in *Physarum polycephalum*

Axel Poulet<sup>1\*</sup>, Ellyn Rousselot<sup>2\*</sup>, Stéphane Téletchéa<sup>2</sup>, Céline Noirot<sup>3</sup>, Yannick Jacob<sup>1</sup>, Josien van Wolfswinkel<sup>1</sup>, Christophe Thiriet<sup>4</sup> and Céline Duc<sup>2#</sup>

<sup>1</sup>Department of Molecular, Cellular and Developmental Biology, Faculty of Arts and Sciences, Yale University, New Haven, CT, 06511, USA

<sup>2</sup>Nantes Université, Faculté des Sciences et Techniques, CNRS, US2B, UMR 6286, F-44000 Nantes, France

<sup>3</sup>INRAE, UR 875 Unité de Mathématique et Informatique Appliquées, Genotoul Bioinfo Auzeville, 31326 Castanet-Tolosan, France.

<sup>4</sup>Université Rennes 1, CNRS, IGDR (Institut de génétique et développement de Rennes) - UMR 6290, 35043 Rennes, France

\*Contributed equally.

#Corresponding author : [celine.duc@univ-nantes.fr](mailto:celine.duc@univ-nantes.fr)

### 1. Analysis of chaperone transcripts

For each chaperone transcript, we provided below the sequence. The transcript name corresponds to the transcript ID followed by the protein ID. The coding sequence is displayed in upper case in bold italics while 5'UTR and 3'UTR are in lower case.

>Phypoly\_transcript\_17984\_PpASF1

tgtcgtgttcagtgagg**ATGGGTTGTGTCAACGTCACTAACATCCAGATACTGGATAATCCAGCCCCTTTCATGA**  
**ATCCCTTGCAATTTGAAATCACGTACGAGTGCATCACAGACTTACAAGAAGATCTTGAGTGGAAGGTTGTGTATG**  
**TTGGAAGCGCAGAAAGTGAAGCACATGACCAAGTGTGGATTCTATTCTTTTGGGACCTGTACGTGTAGGAGTGT**  
**CAAATTTTGTTTTACAAGTTGACCCTCCAGATTCTTCTAGAATTCCAAAAAAGACTTACTGGGGGTTACTGCGA**  
**TATTACTAATGGGACTGTACAAATCACGGGACTTTATACGGGTGGGCTATTTTGTGAACAACGAGTATGCGGAAG**  
**AGGAGCTAAGACTCAATCCTCCAGAGGGAGAGGTAGACTTAAACAAAAGTGGTACGAAATATACTCGCAGAAAAGC**  
**CCCGCGTAACCCGTTTCCCCATCCCATGGGACCAAGAAACCATCATTCCCCCTGCAAAACACAGAAAATTCCTCCT**  
**CCCTCCCCCGCATCACAACCGAAACAGCCTTGATGCCCGCTCAAAACACAGCATGACGGAAGAGATGATGCCTA**  
**TGGAAGTCATGTCTACTTCAACTTAAG**gcggtcaaaattgtaaaataccataaggttgaagcacaagagctgggta  
gaacttggttaaaattacccaaatacgaaaatacgcaaaaaattataggcggatttggcctagaaaaactggataa  
actagttatccgtgcatttctaggttttgacgaaa

>Phypoly\_transcript\_01999\_PpMCM2

ttgcgacgcgcaagaattggcgccaaacctacaccacacaagacctgccatacaaaacatccccctacttccctac  
caacacaaaccaccttcccatcctactcagtc**ATGAGTGATACCAACAGCAACCACAACTCTGACGAGGAGGGCG**  
**AGGAGGAGTATGACCCCTCCATCCCGAAGGACAAGGAGGCAGAGGAGGATGTGGAGTCCGAGACCTGTCCGATG**  
**GCAACCAGGAGGCTATGGATGATATTTTGGATGGTGAGGAGAATGTAGTTTATGACCTGAAGAATTGGAGGCTA**  
**TCAACCAGGGCGAGGATTTGTACAATGGTGATTTCGAACAGGATTACGAGTATGACCCCAACTTGGATCGATATG**  
**ATGAAAAAGATTTGGATGAAAACGAATATGCTGAAATGGGTCCAGAGGAACGAGCAGCAGCAGAAGAAGCTATTA**  
**AGAAACGGAATCGTAAAGTGCAAAAAGCAAAAAGCTGGAAGACTTCCTAGTGCTCTACTCTATGATACCGACGAAG**  
**AAGAAGATGCCAAGCCCGAATACAAACCGAGGAGGAAAAGGCCACGAGTCAACGACCTAATGTTGGAATGTGT**  
**TTGTTGAAGAAGAGGATACAAGAGATTTGGGTGATTTGGATGTTAATTTGGAAGATGTAAAGGTCCCTTGCGCG**  
**AATGGATTAGCTTAGATCCCACAAAGAGGACAATTATGCGTCGATTGAGGAAATTCCTAAAAACATATGGTCCTG**  
**CCAAAGCCCCCTTTTATCAACAGGCCATTCAAACAATGTGTGCGGCAAATCAAGAAAGTTTGTGGTGAACCACA**  
**ATCACCTGACACAGACGGAGCCCTTGATAGCCATTTGGACGGCCGACGCGCTACTGAAATGATCCAAATTTTTG**  
**ATGAGGTTGCCATGAACTCGTTTTGGAATGTTTCCCAATTACGAAAACATATGTCCAGAAGTACACGTTCTGTA**  
**TAACCAACTTGCCGGTGAGTGATTGCTGCGCGAGTTGCGTCAAATTCATTTAAATGTTTGGTAAAGGTTTCTG**  
**GTGTGGTCACTCGCAGAACATCCGTTTTCCCTCAACTTAAATATGTAAATTCGACTGCTTGAAATGTTCAACGA**  
**TCCTTGGGCCATATTACCAGGACGGACAAGCGGAGATCAAGGTGCGAATATGCCCAATTGTCAAAGTAAGGGCC**  
**CGTTCGCCATCAATGCGGAGCAAACTGTGTATCAATGCAAAAAAAAAAAAAAAAAAAAAAAAAAAAAAAAAA**  
**AAAAAAAAAAAAAAAAAAAAAGATCAAAAGAGGTGATACTTTTGTGGGACCTAATCGACAGCGCGCTCTGGAG**  
**AGGAAGTAGAAGTAACAGGCATTTACCGCCACAACCTTCGACGAGCACTTGAACAAAACACACGGATTTCCGGTTT**  
**TCGCGACTATCATCGAGGCAATTATATATCAAAAAAGACGACTTGCTAGCGTCGTTCCGCCTTACTGAGGCCG**  
**ATGAGAGAGAGATTAGGCGACTCGCCAGAGACGAGCGTATAGGAGAGAAAAATTGTACAAAGTATTGCTCCTTCTA**  
**TTTATGGGCATGATGACATAAAATTAGCACTCGCGTTATCCCTATTTCGGAGGACAATCAAAAAACATTGGTGACA**  
**AACATAGGATTGCTGGGGACATCAACATCCTCTTGCTGGGCGATCCTGGGGTCGCCAAAAAGTCAGTTTTTGAAGT**  
**ACATTGAGAAAACCTGCCACAGGGCTGTGTACACTACCGGTGAGGGTGCCAGTGCGGTAGGTTTGCAGCTGCCG**  
**TGAGGATTGATCCCGTGACTCGTGAGTGGGTTTTAGAGGGGGGTGCGCTTGTGCTTGCCGATAGAGGAGTGTGCC**  
**TTATCGACGAGTTGCATAAAATGAATGATAAGGATCGTACTTCCATCCACGAAGCTATGGAACAGCAATCCATTT**  
**CTATATCAAAAGCAGGAATCGTAACGACACTAATGGCGCGCTGCGCAGTGATCGCAGCAGCCAATCCCATAAAAG**  
**GACGATACGACATCAGCATTCCCTTCTCGCAAAACGTAGAGCTCACTGACCCCATCCTTTCCCGTTTTGATATTA**  
**TGTGTGTTGTTAGGGATATTGTGGATCCAGTAAAAAGACCAGCTCCTTTTCGCGATTGCTGCTGCAGAGCCACATCC**  
**GCTCCACCCGATCGTGAAAGCGCAGGCGTCTTTAGCGAACGCCCCAAAAAACCTTTTCCGCCCTCCCCCACCT**  
**CTTCCGCCTCTTTTCGATGCACCCCTCAGGACCCATGGAGGATGGATCACAATCCCAGTCGCAATCTCAATCGCAAG**  
**ACCTCCCCCTCCCAACCAGATCCACCTATACCGCCAACCACATGCCCGAAAAAGACCAACAAAAACATTTTATCTC**  
**AAGAACTCTTACGGAATACATTCTATACAGCAAAACAAAAAGTGTTCCTCAAGGTCTTCAGGAATTGATAAGGATA**  
**AAATCAGCAGCCTGTACGCAGACTTGCGTCGCGAGAGCAGCGCTCCTGGGTCTGTCCCGATGACCGTGCGTCATC**

TTGAAAGCATCATTGGAATGGCTGAAGCGCATGCAAGAATGCACTTGAGAGAACAAGTGAGAGAGGATGACATAA  
ATGTCGCGATCCGCGTGCTGCTAGAAACGTTTCTGCGCAAAAGCTTAATGTGGCTAAAACGATGCGTAAAT  
CCTTCCAGAAATACATTACTTACAAGAAGGACTACAACCGATTGCTTTTCCACATACTGACAATGGAAGTGC  
AACAAATGAACTACCTCTCCGTGAAGCACCAAATCGACAACCCGGAGCGCGTGGAAGTGATGTGCCAAGACTTTG  
AAACAAAAGCGCGCAACTTAATATTACAGATTTTTATCCGTTCTACAACCTCAGATATGTTCCACAGTAATTTCA  
TTTTAGATAGAAGGGAAGAGAAAATCATCAAAACATTTTCATAAacatcaatacgttttcagtacgtaattgattc  
cttgtaaaaatattattaaatttttghtaat

>Phypoly\_transcript\_03991\_PpHSP90

aaactacctgaaaaacttgacatcactccacaaaaaacaggcacgcaggacctgagagtcttctgctggttcttctc  
aaacacattgcatcgctctgaagtagcttcgatctaccaaaaccaacttatatacacatacacacaaccATGTCTGAAG  
TCGAAACATACACGTTCCAGGCTGAGATCAACCGCTTATGAGCTTGATCATCAACACTTTCTACTCCAACAAAG  
AGATTTTCCTTCGTGAACCTCATTCCAATGCATCTGATGCTTTGGACAAGATCCGCTATGAGTCCCTTACTGACA  
AGAGCAAATTGGAGGGTGCTCCCGAGCTCTTCATCCACATTGTCCCGACAAGGAAAACAAGACACTCACCTCA  
TCGATACCGGTATCGGTATGACCAAGGCAGACCTCATCAACAACCTTGGTACAATTGCACGCTCTGGAACCAAGA  
ACTTCATGGAGCACTTGCAATCCGGATCAGCTGATATTAGCATGATTGGACAATTCCGTGTGGGTTTCTACTCTG  
CATACTTGGTCGCGGACAAGGTTACCGTGACCAGCAAACACAACGATGACGAACAATACATTTGGGAGTCCAGCG  
CCGGTGGTGAGTTCTTCATCCGCCGCGACACCGGAGAACAGCTCGGCCGTGGTACCAAGATCATCTCCACCTCA  
AGGACGACCAACTCGAGTACCTCGAGGAGAAGAGAATCAAGGACTTAGTCAAGAAGCACTCCGAGTTCATCCAGT  
ACCCCATCTCTCTCTGGGAGACCAAGGAGACTGAGAAGGAGGTCTCTGACGATGAGGAAGAGGTCAAGGAGGGAG  
AGAAGCCCACCATCGAGGAAGTTGATGAGGACAAAGAGGCCGACAAGAAGAAAAAGAAGGTCAAGGAAGTCA  
CACACGAGTGGGTCTCTCTCAACAAGCAAAAGCCCATCTGGACACGCAACCCCGCCGACATCACCAAGGAGGAGT  
ACGCCGCTTTCTACAAGAGCATCTCCAACGACTGGGAGGAGCACCTCGCTGTCAAGCACTTCTCCGTTGAGGGTC  
AACTCGAGTTCGCGCCCATCTCTTCGTGCCCAAGCGCGCCCCCTTCGACATGTTTCGAGTCCCGCAAGAAGCTCA  
ACAACATCAAGCTCTACGTGCGTGCGGTGTTTCATCATGGACGACTGCAAGGACTTGATCCCCGAGTGGCTCAACT  
TCATCAAGGGTATCGTCTGACTCTGAGGATCTCCCCCTCAACATTTCCCGTGAGACCCTCCAACAGAAACAAGATCC  
TCAAGGTCAATCAAGAAGAACTTGGTCAAGAAGTGATCGAGCTCTTCTTCGAGATCGCCGAGAACGCTGAGGACT  
TCAAGAAGTTCTACGAGGCCTTCGGCAAGAACCTCAAGCTCGGCATCCACGAGGACAGCCAGAACC CGCCCAAGC  
TCGCCGAGCTCTCCGCTACAACCTCCACCAAGTCCGGAGACGAGCCACCAGCCTCAAGGACTACATCACCCGCA  
TGCCCGAGTCCGAGGAAGGACATCTACTACATCACCGGTGAGAGCAAGAAGGCCGTGAGAACTCCCCCTTCTCTCG  
AGGCGCTCAAGAAGAAGGGATACGAGGTGCTCTTCTCGTGACCCCATCGACGAGTACTGCGTGACGCAACTCA  
AGGAGTTTCGAGGGCAAGAAGCTCGTGTGCATCACCAAGGAGGGCTTGAAAGCTCGATGAGACCGAGGAGGAGAAGA  
AGAAGGCCGAGGAAGAGAAGGCCAAGAACGAGCACCTCCTGAAGCTCGTCAAGGACGTCTCGCGGACAAGGTCTG  
AGAAGGTGCTGTTGTCCAACCGCATCGTCTGACTCCCCATGCGTCTTGGTCACTGGAGAGTACGGATGGTCCGCTA  
ACATGGAGAGAATCATGAAGGCACAAGCCCTCCGCGACTCCAGCATGAGCACTTACATGCTCTCCAAGAAGACCC  
TCGAGCTCAACCCCAACCAACCCCATCGTTCATCGAGCTCCGCAAGCGCACTGACGCCGACAAATCCGATAAGACCG  
TGAAGGACCTCGTCTGGCTGCTTTTCGAGACCGCCCTCCTTTCTCCGTTTCTCCCTGGAAGAGCCCAACTCTT  
TCGCCAACCGCATTCACCGCATGATCAAACCTCGGACTCAACGTTGATGACACAACATCCGAAGAGCCCAACCG  
AAGACCTCCCACCCCTTGAAGGAGAGGCCGAGGCTTCCAAGATGGAGGAAGTGGACTAAaaaaacgcgatcctct  
ttgtaacgatagcaaaaaaattataaaaaatgatgaaggaagag

>Phypoly\_transcript\_04582\_PpHSC70

gggggtggtacggttacccctggtcttacgcaagacttgagatcaatcagttcgtacacacaATGAGCAAGACAG  
CACCCGCTATTGGAATCGACTTGGAACCACTACTCCTGTGTGGGTGTGTGGCAAAATGATAGAGTGGAAATCA  
TTGCCAACGACCAGGGTAACCGTACCACCCCTCCTATGTTGCCCTTCACTGACCAAGAGCGTCTTATTGGTGATG  
CCGCAAGAACAAGTGGCCCTCAACCCCGAGAACACAGTGTTTCGATGCTAAGCGTCTCATTGGTTCGAGGTTCT  
CCGACCCCGTCTGCCAAGACGACATGAAGCACTGGCCCTTCAAGGTCAATTGCCAAGGAGGGAGACAAGCCCCACA  
TCAGAGTCACATTCAAGGGAGAGCAGAAGGACTTCTCCCCGAAGAAATCAGTGCGATGGTGTGATTAAGATGA  
AGGAGACCGCCGAGGCTTTCTCGGAGCCACAGTCACCAACGCTGTGATCACAGTGCCCGCTATTTCATGACA  
GCCAGCGCCAGGCCACCAAGGATGCTGGAACCATTTCTGGTTTGAATGTGCTCCGTATCATTAACGAGCCCACTG  
CTGCCGCTATTGCCTATGGTTTTGGACAAGACTGCCGAGGCCGAGAAGAAGCTGCTCATCTTCGATTTGGGAGGTG  
GTACATTTGATGTGTCCCTCCTTACCATCGAGAGCGGTGTGTTTGGAGTCAAGTCCACTGGTGGAACACCCATC  
TTGGAGGTGAGGACTTCGATAACCGCCTCGTGAACCACTTCATGGAGGAGTTCAAGCGCAAGTTCAAGAAGGACA  
TCACCGGAAACAGAGAGCCATCCGCCGTCTCAGAACCGCCTGCGAGCGTGCGAAGAGAACCTTGTCTTCCAGCA  
CCCAGGCCTCCATCGAAATCGACTCCCTCCACGAGGGTGTGACTTCTATACCAACATCACCAAGAGCCAGGTTCCG  
AGGAGCTCTGCATTGACTTGTTCGCTGGCTGCTTGGAGCCCGTGAGAAAGGTGCTCCGCGACGCCAAGCTCAGCA  
AGAGCCAAGTCCACGAGATTGTGTTGGTGGTGGATCTACCCGTATCCCCAAGGTCCAGCAACTCTTGCAAGACT

TCTTCAATGGAAGGAGCTCAACAAGTCCATCAACCCCGATGAGGCCGTGCTTACGGAGCTGCCGTGCAAGCTG  
 CCATTCTACCGGAGAGGGAGGCAAGAAGGTCCAGGATCTCTTGCTTCTCGATGTGACCCCCCTCACCCCTTGGTA  
 TCGAGACTGCCGGAGGAGTGATGACTTCCCTCATCTCCCGTAACTCCACCATTCCCTTGCAAGAAGGCCAGGTGT  
 TCTCCACCTACTCCGACAACCAACCTGGTGTGCTCATCCAAGTATATGAGGGTGAGCGTTCCATGACCCGCGACA  
 ACAACTTGCTCGGAAAGTTTCGAGCTCTCCGGAATCCCCCTGCGCCCCGTGGTGTTCCTCAAATCGAAGTGACCT  
 TCGATATCGATGCCAACGGTATCCTCAACGTGTCTGCTGAGGACAAGTCCACCGGAAAGAAGGACAAGATCACCA  
 TCACCAACGAGAAGGGACGTCTCAGCAAGGACCAGATCGAGAAGATGGTCAAGGAGGCCGAGAACTACAAGAAGC  
 AAGACGAGGAGGCCAAGGACAGAGTTGAGTCCAAGAACAAGCTCGAGAACTACGCCTACTCCGTGCGCAACACCA  
 CCAAAGAGGACAACCTCAAGGACAAGCTCAGCGCCGAGGACAAGGCTGCCATCGACAAGGCGGTTGATGAGACCA  
 TCAAGTGGCTCGACGCCAACCAGAGCGCCGCCAAGGAGGAGTTGACCACAAGACGAGCGAGCTCGAGAAGGTCTG  
 TGAACCCCATCATGACCAAGCTCTACCAATCCGCCGGCGGAGCTCCCGGAGGAGCGCCGGAGGTTTCCCCGGAG  
 GTGCTGGCGGATTCCCCGGAGGTGCCGGAGGTTTCCAGGCGGAGGTGCCCCAGGAGGCGGTGCTTCCAGCGCTG  
 GTGCCGGCCCAACCGTTGAGGAAGTCGACTAAAtcgagactcgaaattttgaaaaataaaacccttgtaaaata  
 gcaaaacaaaaaagagaatagtcaacaaaaaaataaaacccttgtaaaat

>Phypoly\_transcript\_01375\_PpIPO4

cgcacacacgagcaccgcgttttcgtttgcctctgtgctgccATGGGGGTACTGTGGAGCAATTGACACACTTATG  
 TGAGCAGGCCCTCCATCCCAACACAGAGATTGTTTCGTGCTGCCGTACCCAGCTCAATGCCGCGCTCACCGACCC  
 TCAATCAACCATGCTTTTCTTGGCTATTGCAACAATCCCCCATACACAGTAAAGCAATTTGCAGCAGTGGT  
 GATGAGGAAGCGAGTGGTGGGCCACTACTACAAGCTGCCTCAAAATGAGAGAGGGGTGTTAAAGGCCTCCCTCCT  
 TTTGATGCTGCATTCTGACACAAAAGTCGAGGTTATTGTAAGGAGGGCAGTGGCAGACGTTGTGGTGACACTTGG  
 TAAAGCTATTGTGCCAAGAGGTGACTGGAATGTTCTGTTACCCACTATCCTCAATGCTGCTTCTAGTGCTGTTTT  
 GATTGAGGACAGAGAGATAGCAATGTATTTGTTAGCAGCAGTAATAGACTCCCTTGGGGACCAGATGAGAGAACA  
 CTATGCATCATTGCACACCCTCCTGGCTGCCTGCTTACGAGACAGCAACCCCTTCTATCCGTTTATTGGCTCTCCA  
 CACCACAAGTGCTTTAATTCCATGGCTGGTAACCAAAGATGATATAGCACTATATGGATCTCTAATACCATTGGT  
 GGTGATGTTGTAAATATTTTGTACAAATGAAATGGATGATGATGCTATTGAGTCTTTCTCAATTTTAGAGGA  
 TCTTGTAGAGACACCCATACCTGTGATTACAAATTCATACCAGCTTTGGTGAACTCATGCTTGAAATATGTGC  
 TAACCATCAAGTTGATATTAGTGTCCGACAAAGTGCTCTGTCAATTTGTCCAACCTTGTGTGCGGGTGAAACCTAA  
 GATGGTTGTGAAGAACAATTTGGTCACTCCAACACTCGCAGCAGCAATTTGCCATGTGTGCAGAGGGAGAGGGTAA  
 CGATGAGGCTCAACAGGATCTCTATGAACAAGAGGAGACACTGTCCCCATACATCTTTGGCTCACAAGTGATTGA  
 TACTGTGGCACTCTCACTACCTGTGAACCAGGTGATAGGCCCTTCGCTCGCACTAGTCGCCCCAATATGGCAGGCC  
 TGAGATGCACTTCCGCCAGCGTCGTGCTGCCATTACTGCAATTACTGTGTTGACCGAAGGCTGTGCGGAGTCAAT  
 CAAGGACACTCTGGCTAAGGTGCTACGTACGTGGTGGGGGCACTAGTAGATCCCTCGTTTCTGGTGCGCCAGGC  
 AGCATGCTTGGCCATAGGGCAATGTGCAGATAACTTACAACCTGAAATCATTGACTACCATAATGTAGTGGTTCC  
 TGCTTTATTGCAAGGATTACGAGATCCCATGGAATCGGTTGTGCTCCGCTGCTGCTACGCCCTCGAGGCGTTCTG  
 CGAGTCCATGGGCGACAAATTTGTGCCATATCTAGCCACGTTTCATGGAATACATGGGCGAGGTCATGCGCACGAA  
 GGGCATAGAGACGCAGGAGGTGGCCGTCAAGTGCGATTTCGTCCGCGACTGTGCGCCGCGGTCTCTGTTCTGTTACC  
 CTATTTTCGGTGCAAGTTTACGAGCTGATGCGAACTATGATGATGGCTACCGGCTTAGGTGCTACGGAGCCAGAAAA  
 GATCATAGTGGTGCGAGCCAGGGCGACGGAGTGCATAGGGTTGTGCGCTCTGGCAGTGGGAGAGCCGGCGAAAGG  
 GATAGTGCATGACGCGATGTCTCTTGCAATTGGCAGGTCTGGAACCTTGGTTTTTCGGAATTGAATGAGTTTACCTT  
 TGGATTTTTTTGCAACTTTTTCGAATTGCTAGGCGCCGATTTTGTGAACTACTTACCAGTTGTGATGCCGCACAT  
 ATGGAAGCCTGCGAATCTTCGGATGGAATATTCCCTACAGCAAAAACCAACTAGAAGTAGAGGGCGATGACGA  
 AGAGCCTCTTGATGTTAGCGTGCGCACTTCCTTCCTTTACGAAAAAGTGCTGCTTGTGAGGCTATCGGGTCTTT  
 TGCAATACATGTCAAGGTTGGCTTTATACCATTGTAGACCAGTCAATAGCAGTATTGAATCCTTTGCTTAATTA  
 TTTCCACGAGACTGTTAGAGCTGCTGCCATAGTTTCTATCCAACAGATCGCGGTTCTATTACACAGCTTTTCC  
 TCCACCTACGCCTTTTGTACCTGGCGATTTGACCATCCCTCTGTGACGCAGAGCAAGGAGTACAGCACACGAGT  
 GATGCCCGTATTAATCTCGGCTATGCGTGATAAATCGTCTGATGTAGTTGTGCGCGCCAGTGACTCGATTGGTGA  
 AATTGCTCAGCTGTTAGGTCCTGTTGCTGTGCGCGAATTCATGCCAGCAATTGTAGAAGAATTTTCATCCATTTT  
 GCAACAAAAGTCTCCTTGCCAAATCCATTTTACTGAAGGTGATGAACTGGATGATGAAGGCAATTCAGAGGATGA  
 AGAGGGAGGTCCGGCAGAAGAAGAAGAAGAGGATGACGATGCACGCTTCTTACACTACTCGATAATGTGACCGA  
 GTGTATGGTGGATCTTGCACATGCTCTTGGGTACAGTTTACCACAGCCATGCAAGCATTCTTCCACAACATCAT  
 GAAATACGCACGCAACAGTGCACATCACTCACTGCGTGCTACTTCCATCGGTGCAATGGCTGAGACCATCAAAGG  
 CGCACATACCCTCCCTCCCCAGACCTCACCTCTCAATTGTTCCAGCTTGGGCTAAATGGTATGACCAACCGGCA  
 AGCTGACCCAGATATTAGCGCACGGCTGCGTTTTTGTGTGGTGTGTGATTGAGATGGGCGGAAACAACATGGA  
 AACGCAGATTACAAATGCACTCCAAGCCCTGCACCCCTGTTTGGCAGTCCAGATCCGACTGTGATTGATAATGC  
 ATGTGGTGCAGTAGCCGAATTATACTCACATTCCCCGATTACCCACATGTGCCCATTTGAATTCATCCTTCCCAC  
 CCTTCTCCCTGCACTCCCCCTCAGAAAAGACCACCAAGAAGATGAACCTGTGTGGAAATGCGTTGCGGAGCTAAC



ACGGTCTGCAAAAGTCAATGCACAGGGGGAAACGACAGTTGCCCTCCTAGAGACAATACTCCGTGGATTGGAAAA  
TCCCCACTACAACCCCAACTCAAAGATTTACTGAAGCATGCACTTGGTGGATGGTTCCCCACATTGCAAGCACT  
CTCCAGTTCTACCCCTTCCTTAGTCCCTCTGTTGCACACTGTCACCAATAAAAAACCTGTAAattacaacccatct  
cctaatatcccaata

>Phypoly\_transcript\_00177\_PpSPT6

ctcctgcgaagcacacataaaaagctggttgtttgtgatttcaccagcattcagttgctgagcatcgctggttgaca  
caagacATGTCTAGCAATGAATATGTGGAAGAGGAGCAAGACACCCCTTGTAGTGCCAGAAGGTGAGGCCGCCGCG  
CCAGAGGGAGCGGAAGAAGGATATCAGGAGGGACAAGCGGAAGGTCAAGAGGAAACACAAGAGGGGAGGTGGCa  
gagcaggaggaaggcgacagaagaggaaggcgaaggggaatcaagagaaaagaagaagaagaaaaagaagaaaaag  
aGGAGCGCTTTTATAGAAGATGAGGCGATACTCAGCGGAAGTGAGGTGACAGCAGCGAAGAAGAGGACGGAGAC  
TCGCAGAACGAGTACGAGTACGACGACTTCACGGTGCCACCGGGATGgagaggaggaggggagagaggaggaggga  
ggaggagagaggaggaggaggaggaagaagaagaggagggaatgaggagagactggaggaggaTGACTATGATTTA  
GTCAGAGAGAACACAGGACAAAACATAGCCAGGAGGAAACAGGATTCTGCAGGGGCAGGAGGGGGGAACAAAAAC  
TCAAAGAACTAAAGAGGCTGAAGCAGATGGGAAACAGGACAGACTTGTACAGTAATATCCAGAGCAGGCTTTTT  
GGTGATGATGATGACGAAGCGGGGCCATCAGAAGCCATCACCCACGAGGAACCGCGATCGGATGACGAACAGAT  
GACGAGGACGAGGACGATTTTCATCGTGGGCGCGGACGGGAAGCCCATCAAGAGGTGGAACAGAGGAGGTACAGG  
GGAGGAGAGGACAGGGGAGCCCTGCAGGACGCAGAAGACATTTTTGGCAGTGTGATTTTTTCAAACAAGCATCA  
GGCCGGCGTTCCTCGTCTCGGGGCGATGAGTTTCGACGACGATGGTGACTATGTGACGGGCACGCAGGGCCCTGAGC  
GAGGATGAGCTGGACGCAGAGATAGAGGAGGGGGACGAGAAGCAAAGGACCCCCCTCGCGGACATCTACGAGCAC  
TACGAGCCGAGCCTGCTCGAGCAGAAGCACTTCACCTCGGAGGACGAGAAAAATTCGCCAGTTGGACGTTCCCGAG  
CGATTGCAGATGCGAAAAGGCACAGCCTACGACGAGAAGCTCGTGCCCGAAGAGGCCGAGTGGAATTTACGCGC  
GCCTTCGCGCGCACGCACGCGACCGGATAAGGCAATCATCATCCAGCGCATCATCCACGTCTTGCGCTTCCTGCAA  
GAACAGTTGCTGGAGGTCCCCTTTATTAGCACATACAGAAAAGACTATTACCAACCCCTTAAAAATATCTGAACTT  
TGGGACATTTATGACTGGGACGAGAAATGGGCTCATTTACAAGCGCGAAAAGAATAACATTATGCAAATGTGCAGG  
ATGCTCGAGGGCAACCCCAACACGGCGACGAGCTGCGCGAGTACATGGAGCTCCTGCGCGACGGGCGACGGAG  
GAGGACCTGAGCGACCTGCAGGACTACTTCCAGATGTTCTACGCGGACGAGGTGCGCGAGAGCGCCGCGCACGCC  
GAATCGGGAAAGGTCAAGCGCGCGCTGAGGAGGGACTTGTACACTACGGCGAAGCGCAACGGGTTGGGCGACTTT  
GCAAAGAAATTTCGGAATAACCCCCAAAGAATTTCGGAGACAATCTTATGGACAACACACACACACCTATA  
GACAACGAAGAAGACCCCCGAGGCACTTGCGCAAACTACTTGTGCAAAACATTCCCCGACACAGAGTCCGTGCTG  
AAAGCGGCGCGAGTCATGTGTGCGCAGGAAATCGCATTCGACATCCACGTGCGCCAGAGTGTGCGCTCAGTATAC  
GTGAAACGCGCCATTCTTTCCACCGTGCCAACGCTAAAAGGCAAAAAGGACATTGATGCATTTTCATCCATATATG  
ATCATAAAACAAATGGACAAGCCGGCCATGCAGATGGAGGACTTCCAAATGTTACTCGTACTCAAAGCAGAGAAG  
GAAGGTTTTATCACAACAAAAATACACACGGACGAGAAAGACGTGCTCCAGGAAATGGACACCTTATATACAAGC  
GACGGAACGAGTGCTACCGCAGAAGCGTGGAACAACACCGCCGCGAAATCCTCGCCCTCACGCTGCGGAACCTAC  
CTCTTCCCTCTCTTCGCGCGCGAGCTACGCGCGAACTCACGCAGGAAGCGCAGAACTTCGTGCGGTACGACGTG  
TCGCGCCGTCTTGAGCAGCAGCTTCTCGTGCGCCGTGGGCTCCTGAGGAGGACGACTCGACCGACGCAGAGGAA  
GAGGATGACACGCCGCGCAGGATGCGCATCATCGCAACGTGTGCGGGGGGCTCGGGGAACCCACGATGGCTGTG  
GTTTTGGATGACGAGGGAGAGGTTGTAGAGTACCTTAAGCTCAGCTTTTTGAACGAAAGGCGTACAAATGCGGAC  
GGACGAGATAGCACCAAGACCTAAAAACCTCGAAAAATTTGTACAGGACCACCAACCTCGAGCTATCATTGTC  
GCTGCAGAGAACCTCGAGTGCAGGCGATACTACGAAGATATTATGGCAATTGTCCAAAACTGAGGGGGTCTCGC  
GAATTGCGCAAGCAGTGCAAGGTGATGTATGGTGACGCGGAGCTTGCGCGTGCAATTAAGCAATCCCATCGTGGA  
ATTTCAGAATTCCCTGAGTATCCTCCACTTTTGCGCCAAGCTATTTGTTAGGACGCAAATGTTGGATCCAGTA  
ACAGAATTTGCTAATTCTTGCGATGACGCTAACGGTCACTTTGTGTTACGCATGCACGATTTGCAAGACATGGTG  
CCCCAAGACAGGCTCGCGAAGTCAATCCACCGCGTGTTCATCAACGTGCTGAACGCAGTGGGAGCCGACGTGAAC  
CGCATGCTCACGCACAAGTACGCGAACGCATCGCTCCAGTACGTTTCCGGTCTGGGCGTGCGCAAGGCCGAGTAC  
CTATTGCAAGCTATTTTCAGAAAGGGTCGATCGCTCGCGTCCAGAGACGAGCTCACAAGTTTCGTGGACAAGTGC  
GTTTTTCATGAACTGCGCTGGATTCAATAGGATTTCGCGACAAGCATTCTACAACGAAAACGTAGAACTTGAGCCA  
CTCGACGATACACGTATACACCCGGAGGACTACAGGCTCGCGCGCAAGATGGCTGCCGATGCGCTGGATCGCGAG  
GGCGAGGATGCAGTTTTACAAGAGTGCAATTTACGCGATTATGGAAAAGCCGAAGAAGTTGGATGATATTGATTTG  
GATGCTTTTGCTACAATGTTGGAAAGCAGTGGAGAGATCAAAAAGATGACACTGTACGACATCAAGAAAGAGCTC  
ACACATCAATTGCGCGACATCCGCACTAAGTACACTGACCCTACTAACGTTGATATCTTCCACTGGCTCACGGGA  
GAGACCGACAACCTCGCTGGCGGGCGGAATGATCATCGCGCTCGCGCTTTCGCGCAATCGGAACGTTCCGTTTTG  
TGCCGGCTAGAGAGTGGGTTGATCGGATTCATCAATTCGAAAATGTGAGCGATGACAGAGAGGCCGCGTCCAGT  
TCTACCATTGCTGTGGGGCAAACCGTTACGCGCGTGTCTCAGCATTGACAAGGACAAGTTTTCTCTAAGGCTC  
TCGTGTGCGGCTCGGATCTGGACAACCCGAAGTGGGAGTACGACAAGTACGAAGAATTGAAAAAATTGAACAA

**TTCTTGGTTATCGAGTTGGAGCCCAACAAGGACGAGCCCAAGAAAGAGGCCGTGCGCAGGACCACGTGGAACGTG**  
**CACCACCCGCTCTTCCAGGACACGGATTTTCATCGGGGCCGAGAAGTTTTTGGCCGACAAACCGATCGGGGAAGTT**  
**GTAATCCGGCCCTCGTCCAAGGCCCCCGACCACCTCACCTTTTCTTGGAAAGTTTTTTGACGGCGTGTACATTAC**  
**ACTGATGTCCAAGTGAGGGACAAGAAAAGTGCGAGGAGTTTGGGATCACTTTTCATTGGAGAAAATAAATATGAT**  
**GACTTGGACGAAATTGTGGCGAGATACATGGACCCGATAAACTTTTTTGTACTCGAGATGATTAACACCAGAAAG**  
**TTCAAGCGATCTTCCAGCAGGAAGTTGATCAATTGGTCACGTTGAGAAAGGAGCAAGCCCTACATCGATCCCC**  
**TACTACATCACAGCCCCTAAGGAGCACCTTGGACGCTTCGAAATCACTTACATGCCCTCAACGCGCCTTAAGCAC**  
**GAGTTCATCACGGTGAACCCAGAAGGCTTCTCGTTCAGGAAACAGCCCTTCAAGAGCGTGGAGCAGCTGATCAAG**  
**TGGTTCAAGTTACACTACAGGGATCCTATTCTCCACCAAAGAAAGCCGACGAGAAACCCCCACGCCAGCCCCA**  
**ACACCCGCGCAACTGCAGCAGCTGCAGCAAATGCAAACACAGCAGCGCATGTCGACGCCGAGATCAACGCAACA**  
**CCCGCGCACCTTGGCGCAGCGACGCCCCGCGCACCCCGGCAACGCAACACCCGCGCACCCGGGCAACGCGACGCCC**  
**GCGCACCGAGGGCAGCGGATGGGCGAACGCCGCGCAGGGCGGGAACAACCTTCCCGGGGATGCAGGCCATGCAGCAA**  
**AACCTACCTGCCACGTCACTTTTCTTATGGGGCGGGTGGGACCAAAGCGGAACGAGCACGCCGGGGCACTCG**  
**CAGGGAGGGGCAGGAGGGTGAATAACAATAACACAAACAATTACGGAAATAACAATAACGCGTTTCGCTAACCCA**  
**ACGAATGACGTCACGATGGGATGGGAGGACAACATAACAACAATAACAACAATTCCAACAATTACGGAAATAGC**  
**AATTCCAATTACGGACAGAACGACAGTTACGGGAATAACCGGGACGATCGCTCGCGAAGGGGACAATAATTCCAAT**  
**AATTACGGAAATAACAGAGATAATTATGGGAATAATCGGGGGAATAGTTACAGAGATAACAATAACTACAACAGT**  
**AACAGAGATAGCAGTAGGTACGGCGGGGGAGGGTAtgggggaggaggaagagacaactacaggagtggaggagga**  
**ggagggggaggga tacggaggaggaagcggaggggggatacggaggagATAGAAACAGAGACAGCAGGGGAGGAAGA**  
**GATAACTACAACAATAACAGGAGAGACGACAGGGATTACAAcaggaggagcgggggaggagggggagggggatac**  
**ggaggagacaggaacagggaTAGTCGAGATAa tagaggggagagacggaggggagaggggtgggacgatagagataag**  
**gggagtggaggaggaggaggagggggagggaagaagaagcagagggggagagGGTTTCGAAATATCGGCGCAGCAG**  
**GTCTTCCACGGACTCCTCAGCTTTCCCTCGTACCGTTCTGGAAGAGTCTTTTGTAAaaaaagttgggagctgaag**  
 ttggcctatgtaggtgtcatttggcaaggagctgagcacttcagaggtttcttcgtcataaaactgatgttgaag  
 gaaagcatttttgtgagttgttgggaccgaagaaaagccctcaaacactaaaatgggttccaagaaatttcttag  
 aggtacctcttcgaggatatctgtgcgaacaactcgtgttggaaatatttttctcattttaatactgcggtc  
 cttagaacagcgataaaactggcaaatagcaaccaaacgctcttccgggttcagttcctccgtatcctctacaat  
 gagcaatatatttataatagaagggatacatggaacattgagatcaatatatttttgcagttgcaaagtgtcctac  
 tgaaaagtggacgagtggttctgcgcgagaagtgagtgcggaaggaatcgtagagattgcaattcttaattgttaaa  
 ggtgtggatttgcctcctagtagcgttcggtcgcggtgggggctcctcaccttcgactacgttatcaaaatattg  
 gttcgatatgccttcatttatttcttggccttttgccttgaaatgttggtagcaaaggagctacgtccaccatatt  
 ggtgtagatctagagaatgaacgtgagaaaagtactgggttaaaagaaccaggagcttaattgatcgtgaatgtgc  
 aaacaaatgtggtattaaggtctattttaagtatagtgagaaaaatgtggcgctaaacatatttgcacgtgtg  
 gaaagaagaaat

>Phypoly\_transcript\_03499\_PpAPLF

ataatccggtacaaagaacgctctggatggcaacaactcctacacagtagattatgcacccacagcaaaagctg  
 gatgcaaattttcacaatgcaaaacaaaaatagaaaagggatcttgcgcattggaaaatcatatccctctgata  
 ggtttactgatggagggctctggaaatgaatattatcatcccaagtgtggtttgaggtcaaaagaagacaaaaga  
 aaactacaaagaaagtagagagcgaagatgatttacagggattcgacgttatttcgtcgacccgatcaagaactta  
 ttctggatcttattaaacataggaatgatccccgcgtacactctccaaagaaaaaagcaaaaaaagacgcaggag  
 gcgaggggggagggggaacgccccaaaaagaacaccaaacagacctacatcgacagcgacgaggaaaaaagcacgc  
 ccaaaaaaggaaatttctaataatagcagcaccagtaacggaaataacaagaataaggacaacggcaaaaaacaaag  
 ggaagcaaatttccggggtcggatggggaggaatcggaggacctggaaaaggacgcgtgggctgctgtggcgctcaa  
 acgggagcaggggtggccagagtcctaaatagcacagatatcagacaagtttcagttgtgatactgcctcagcct  
 cgagcagggccataaaagcgtgctgcccgcgaagatgatcgcgcttttgaggatgaatttggaggagaccoggatg  
 catatctacaatgggttggcaggaactggagtgctatggatcagcacggattttgatgatgcaggctatacatctc  
 caggcttgtggaccgatacgtatcgagatcgtgcccagattttcatgcaaaaaccaaagaagggccttgtgg  
 tggctatgtggggacctgaacaaaagcgtttccgaaatgagataaagaagcactaccaagacaccatggggacag  
 tcaagtaccgagcgctcgagggtcccacgccccctaaactcagccttcaactcgaaagacgagctctcgaaaatcg  
 acgacgcacgcaccttattgagc**ATGCACGCGCTGCACTGGTGGCCGTTTCGAGGGCGAGGTCGCGCAGAACCAGG**  
**AAAAGAAGGAGAAAGAGAAAGAGAAGAAGAAGGGGGTAGTGTGGGGGAGGGAGGGGCGAGGTGGGTGCTGGAGT**  
**GCAGCGAGGAGGGGGACATCAAGGTGGAAGTATGGGCGGTCTACGGAAGTACGAGCGGGGGTTAGTGAACAACA**  
**AGAAGATCAGTCGAAGCAGTGTGTCTGTGGAGACGGTGGATGACGGCGTTGAACTCACTCCCCCTTGGTGTGAATC**  
**CCATGACAATGTGCGCGCGCAGGAAGCGAAGACGTGGAGATCCTCAGCCGAAACGAGAAGTATACATTGCACGAGG**  
**GCGATTTCGTTACCTTATGCGGCGAGCAGTACCGATTTCGTGCTCCAGCGGCCAACGGTCAACCCAGACTACAACGA**  
**GCCAAACTACAAGTCAAAAAGATGGCGAAAAATCGGCGAAAACCCGCTCGCGCCAAGCTTCGAAAAATCGAGGGCG**  
**CGGAAGGCGAGGGCGAGAAAACGAAGAGGGACGGGGAGGCAGATGAGATAAATGAGGGAGATAAAGGGGAGGAGG**

AAGGAAGGGAGAAGCAACGAGGGGAGAAGGGAGAGGAAGGGGAGAAGGGAGAGGAGGGATCACCCGAAAAGAAAAG  
GAGTGAAACGCAAGGCGAGCGATATCGCCACGACTACTACCACAACCTCCTCGGCCAAAAAAACCCCGCAAGGAT  
CCGCAGAAAGCGATTTCGGCTACCGTTCCGTTTAGCGCGGGCTACGATTCCCCAGAGGAGAGCAAGGCAAAAAGCA  
AGAAGAAGCCCGACGTCAAAACGGAGGAGGCTGATGACGTAATCGATGACGAAGAGCTCGCGCGCAAACTACAAG  
AGGAGCTGAACAAGGAAGACGAGGCGCCAAACCGAAAAACCCGAAATCGAAGAACAGCACCCCCGAAAAAGACG  
CAGAGATCGCGAGGAAGTTACAGGAGAAGTACAACAAGGAGAGCGGGGGAGGAGGGGAAGAAGAAGAGGAAGCAGG  
AGGACGACGAGGACGATGGCGAGGTGAACTGGGCGCGAAAGTGAAAAAGCAAAAGAAAGGGAAGAAGGGGGGGA  
GCGACGACGAGGATGAGGACTGGAACGACGTGGGAGGAGGAGGGGACGAGGACAGCGACGAGGACTACCAAGAGG  
AGGAGAGCGACAGCGAAAAAGAACAAGAAAAATAAGAAAAAGGGGGCGAGTCCCAAGAAACCACCATGCAAGTACG  
GCAAGTCGTGCTACCGCACCAACCCAGACCACCTCCGGGATTCTCACACCCCAATAAGttatgaacgtatccg  
tttatgtaattgtacttaatttttatagttatatgcacctc

>Phypoly\_transcript\_27931\_PpPolE3

Aaattcgaaaaatacgagagctcgaaaattttaaaattttcaaaaaaggcgcggttcttgcgcgggaaacgcaggaaa  
gagacaaggATGAGCGGAGACAAGACAGAACCAAAAGAAGAGAAAGAGAAATCAGGAGAGGACCTGGAATTACCT  
CGAGCAGTAGTGCAAAGACTAATTAATATTTCATTACCAGACAATGTACATGTACAACAAGAGGCTAAACTAGCT  
ATTGCACACGCGGGGAAAGTTTTTATCAATTATTTAACAGCTTGTGCGAATGATTACTGCATACAAGGAACGAGA  
TCTACCATTTCAGCTAAAGATGTATTAAATGCATGTGACGAGCTGGAATGCCTGAAATCACTAAAAAATTA  
GAAGTTTTTGAAGCATACAAAAAGAGCAATCAGAGAAAAAGAAAAAGGAAAGACAAAGAAAAAGACGAGGGT  
AAGTCCGAGGATTAAactttgttatactatgtacaatatataaaatcatttattcaaaaaaaaaaaaaaaaaagagcaa  
tcagagaaaaa

>Phypoly\_transcript\_00085\_PpSWR1

ctgaattacgcgaggagcaacatccatagtgttcacgcatctctatcaacatgatgagcatcttctgagccttt  
ggcatggaatggagatgccacgtgATGGTGCAGAAGGGAAGGGAAGCAGCAGAGGTGGAGAGCAGGGGGAATAA  
AAGACAGAAGGGGGTTGCAGAGCCCCCATTCATGATACACGCAATGCCAACACTAAGAGACCATCTCGCAC TTC  
TGAGCAAGCCTCCCCAATCCCCAAGAAGAGAGTGCCTGGGTCTGGTGTGCCTGAATCACCATCAGTAGAAGCAAT  
CGATGTGAGCCAAGAAAGTGAAGTTGCACCTAAGGCTGGAGTAGAGACAGACATTAACATTCCAGCCATTTCGGGA  
GTATGAAGTAGAGAAAAGGCTAGAATTGATAAAACAACCTCACAGAACAGAAAAGAAATGAACTCAAAGAACTTGC  
ATATCTGGAAGCGGGGAACAACCTTGATGGACTATGAAGCCGGCTTCACAAAGGGTAAGATAATGACCGCAAAGGA  
GGAGCCAGGGGAGAATGTGGCAGTAGGTGCAGAAGTCCCCAACAAAGAGGGTCTGGACGTCTTCCAAAGGATCC  
CAACTCTCAATCAAGGAGGAGATCAACAGTTGGCCAGTCTCCTGTTCAAGGTGAATCACTACAAGCCCAATCACC  
AATTCCACAAACTCCCTCAGCGCCACAACTCCAGTACAACCCAGTCAACCTACTCCACAACACCCACCCAACC  
TACAGAGCAGATCACAGCACAGAAGCTAAGCCAGCGGTAGTATTTACCAGCCGCTCCAAGTGCCACTTCCATC  
CATCTTTACCGTCCCTCCACCTACTTCGGAACAAGACCGTGAGCGCGCACTTAAAGACGCAGCGATCATACGCCG  
CGTAGGCGAGCTTCAGCGCACGGGCATGTGGTCCCTCAAGCGTATTCTTAAGGCTGTAGAGCCGCCGCGCGCCAA  
GGTCCACTGGGATCACGTGCTCGCGGAGATGGGGTGGCTGGCGAACGATTTCAAGCAGGAGCGCAAGTGGAAGAT  
GGCTCTTGCGAAGAAAGTGTCTAAACAAGTCATGAAGTACCACCAGATGCAGGAGACGCGGAGCAGCGCAAGCG  
CAAGGAAGAGGAACACCAGATCCGCAAGATCGCGAGTGGCATTGCTCGTGAAGTGAAGAAATTTTGGCAGAAAAAT  
CGAGAAGGTGGTCATGTTCAAGGAACAGACCAAAATTGGACGAGAAGAAGAAAGAAAGTGTAGACAAGCACCTGGA  
TTTTCTCTGGGACAAACAGAGAAGTACTTCGAGATGATCGCCAACGACCTCAAGCAACCCGAAGGAGGAGCTCA  
GAAGGACGCACCAACGACTGAGCAATCCACAGAAGAGAAGGCGGACGGAGAACCAGCCGACGAGAAGCCACTCGT  
CCGAAGCCACACGCAAGAGCTGCTGATGGGGGCTGAGGAAACGGGAGGAGAAGAGGGAGCTGAAGATGACGCCGA  
ATTGCTTCCACCTGAGGAAACTGTAGATGAGGTGCAGCAGCAGGAGACGATGGAGGAGGAGGAGACCAAGGAGGA  
CTCCGCTGACCTCCCCAAGGGTGAGGAGGAGCTCTCCAGCTCCAGCGGAGAGCGAGATGCCACTAGAGGAGAT  
CATCAAACAATTCAAGGAACAGGGCGGCGGGGAGGGTGAGCAAGATGACGCCGAGGATGCAGACGCGGATGAAGA  
CGACGAAGGGGAGGACGACGATGGGAAAACGGGTCAAGAGCGTATCAGCGAAGCAGCAGCCGACGCAACGCAGC  
TCAGCCTACGGGATTTACTGTCCACCACCAAGGTCAAGACGAAAGTCCCTTTTTTACTCCACGGAACCTTGCG  
CGAGTATCAACACATTGGTCTCGACTGGATCGTAACCATGTATGAGAAGCGCTTGAACGGAATCTTGGCTGATGA  
AATGGGTTTTGGGCAAGACCATCATGACAATCGCCATGCTTGCCCATCTCGCCTGCGAGAAAGGAATCTGGGGTCC  
TCATCTAATCGTGGTTCCCAAGCGTGATGCTGAACTGGGAAATGGAATTCAAAAAGTGGTCCCCCGCGTTCAA  
GATCCTCACCTACTTCGGAACGCAAAAGGAGCGCAAGCTCAAGCGCCAGGGCTGGTTCGAAGACGGAACCTCTTCCA  
TGTTTTGCATCACCTCGTACAAGGTGGTTGTGACAGGATCAACAGGCCTTCCGCCGCAAGAAATGGAAGTATTTTCAT  
CCTGGACGAGGCGCACAAATCAAGAACTTCCGGTCCCAGCGCTGGCAAGTCTTCTCAACTTCAACTCCAAGCG  
CCGCCTGCTTCTTACAGGAACCCCACTCCAGAACAGTCTGATGGAGCTCTGGTCCCTCATGCATTTCTCATGCC  
ACATATGTTCCAGTCCCAAGGAATTCAAAGACTGGTTCTCCAATCCCGTCACCAATATGATAGAAGGGACTGA  
GACCCTCAACGAAGACCTCATCACGAGACTCCACGCCGTTCTTCGTCCCTTCTTCTACGTGCGATGAAGAAAGA  
CGTAGAGAAGCAGTTGCCTAACAAGTACCACCAGCTCGTTACCTGCCAGCTCTCGAAACGACAACGATTTCTGTA

CGAGGAGTTTCATGTCTAGCGCCGTTACGCAAGACACCCCTCAAATCAGGCAACTTTTTGGGGATCATCAACGTTTT  
GATGCAACTCCGAAAGGTGTGCAATCACCCCGACCTCTTTGAGGGTCGGCCCATCATCTCTCCCTTTGATATGGA  
CCCGATTGAGTTCTACACCAGCTCAGCAGTGTGCAGAGCCCTGGAAGAGGACCCATTCAAGTCCGTCAACCTCCC  
TTTCTCAACCTCTCTCTTGCCTCCACCGAACTCGAAGTTGGCCACATACAGGCACTGCGCACGTACAGTTACG  
CACCCCGTCACCCAAAATCGTCGAGCTTTCTTCCACTCCCTCTTCTAAATCCACCCCTCTTACAACATTTCGCCCC  
GAGCACCGTCGCTCCTTCCATGTTAGACGAGCTGCGTTCCGCACGTGAAGCGCGCATGCACCAAGAAGCGCTGGA  
CAACCTCAAGCATGCTGCGTATATCAACGAATTTAGGTGCGCTCGCAAGCCGCTCTATGGATGGGAGCTACATCG  
CTCTGTGCGCATCCACCGCCAGTCCATGACGTTTATACCTACGCCAAGACCCCAAGCACTTCCTAGACTACCC  
TTCCACCCCTAAGTACTAGTTAGTGCCTTCTGAAAGCTCGCGCCGGAACCTCAACCTACCTCATCGCCCCATT  
TGTATGCATCATCCAAAAGCCCGTTCTCTACCCCCACGACTCGCCTGCCACATCCCAACCCCTCCACCGTCTCT  
CGAAACCAAGCGATCAGAACTCGAGTTGGTTTCAGAACTATCGCCTACAGTGGATATTTTCCGTCCCGCGTTCTGT  
GCGTTCCAGGTCTACTTCCAGACAAGAGCCTCGTGCAGTACGACTGCGGTAAGCTGCAAGAGCTAGCTGTCTCT  
CCTGCGCACGCTGAAGAGCGGCGGACACCGCGCGCTCATTTTTCACGCAGATGACGCGCATGCTCGATATCCTCGA  
GGCCTTCTGAATCTCCACGGGCACACGTACCTGCGCCTGGATGGCTCCACGAAGGTGCGAGAAGAGACAACAGCT  
GACGGAGCGTTTTCAATACGGATCCCAAAGTGTTTTGTTTTTCATCTTGTCCACGAGGAGCGGTGGTGTGCGAATTAA  
CTTGACTGGTGTGACTCAGTTATCTTCTACGATAGCGATTGGAATCTGCTATGGATGCACAAGCGCAAGACCG  
CTGTACCCGCATAGGACAAACGCGAGACGTGCACATCTACCGCCTTGTACAGAATTCACCATCGAGGAAAACAT  
TTTGAAGAAGGCAAACCAAAGCGGCATTTGGACGACATGGTAATCAAAGGTGGTGGCTTTACTACCGATTTCTT  
CAAAAATGTAGACGTCAGAGATTTGTTTGAGTCAACCAAGGACCAAAATTGACCGAGAGAGCGCACCAATTCAGCT  
GAGAGAAAGCAAGGCAATTTTCGAGCAGGACTGGGAGCGTGCAGCGGCTAGTGTGAGGATGAAACCGATGCAAT  
AGCCCTACGGCAAGCACAAGCCGAACAAGATTTTGATAACGAAGAGTTTACCGAAGAGGCTGGGCAACCTAGCGA  
ATCTCAGCCCAACGGAACGGACGCCCAACGGCAGCCGACCAAGACATGTCATTTCTTGACGACAAGAAGACGAATA  
CGAGCTCCAGGCCACGAATGGCAAGTTGGCTAGCAGTGCCAGTGGATTTCGAGTTCGAAGATAGCCTACTCCCCAT  
CCAACGTTATGCGGTACATTTCTTGGAGCCGTGAACGCAACAACGAGCGGAGAGCCAACCGAAAATGTTACTGA  
GGAAGTGAGCACCCGAGAGCAAGAATGGGAGCTGGAGAATCAAGCGCATGAAGGAAGAGGAAGAAGAGCGCAT  
GTCAGTAAGAAGATCAGCTTTTTTACGAGGTTTTCTGAAATGCGGCCGAGTTCCGGGCTAAGCTGCTCGCCGA  
AATGGAAGTGACTGCCACCCAAACCTGACTCGAGACCTGTACATCCCCCTACGATGGGGACTACCTCTC  
CCAATTTCCCCCGTTTCCACCGCCGTTTCGAGGACGACGATACTCTCCCAAAAACGAACCCCGAGAGAAGCGATC  
CCCGCCCCCTAGCCCTCCGGGAGGAGAAGTGGGGGATCAGGAGGCATACACCACTCGCCCGCAAAAAGAGAGAAAG  
GAAGAAGCATGCCAGACTGATCATGTTCTCAGTCTCCTCCCTCCCTCCCATGCCAACTAAAAGGAGGAAGGGG  
CAGGAAAGCTAATGGCGGTCTTTTCCCAAGTAGGATTGTACCGAAAACGGCCAGAGACGGGAAGAAAAATCGCACC  
GTCAGCCCAACAGGACCTCTACCCCTGGTCCCCCGAGGAGGACGAGGCACTGACCAACGCCACCCGGACCTACGG  
GCTCAACTGGGATCTGGCCTGCGAGATGCTCCTCTCAACCCCGCCCTACCTCGCGGAAGTTTCATGCGCACGGC  
CACTGCGTGCGCGGAACGGTATCGCACGGTTCTGCAGCCGCGCGCAGCGGGCGAGGCGGATAAGGACCGCAAGTC  
TCCTCCCTCGTCTCCCTCATGTGCGCATCCCAAGCGCAGCCACCGCACTTTGGTATCGTGGATGTGTTTCGCAG  
TATGGTTAACCAGAAGAAGGAGATCCCTGGCATGATAGGGAGTGTTCGCGCAGACGGACCAATCTGTGCCACCACA  
TCCTTCCCATATGCAGGCTGCCATGCACGCTGGAATCACGTGAGCAAAAGCCACTTACCCCCCGCGATGTTCTCGC  
TCTCATTTTCACAGCGCGTCTGTGTTGACAATGCCACAAAAGGAAGTCCCGATCCTAACAACCAACTGGCTACCAAGCT  
TGACCCCAAAATATGCGGCTTCGCGCAGGGGCTCGGCTCGAGCATGGCGCTCGCGATCGCAGTGGCGAATCACGC  
CGCGGCATCTGCGGCAGCAGCTCAACCGGAATCCAGCCAAATTCATGGTGCAGGGCAAGGACAACCCGGCGT  
GCCTGCCAACACCGCCGCGCCAGCCGCGACGTTTACGGTGCCTGGACCCGGGGTCTGTCGGGGGCGTTCCGGCCGC  
CAACAGCATCATCTCAACCCCAACGCGAGCAGCAACGCGCAGACCTCGCGCAAGCTCGCGCAGATCAACCAAG  
CATGCTCCCCACCGCCCGAATGTACCATCCCCCGCGCAACCTCCCCGGGGGTGTCCCCACGGTTAACCGCGC  
GCCTGCGGTAGTTGTAGCAATCCCGAACAACCCAGCTAGTGTGCGGGTCCCCCGCTCTAATCCGAATAATACCAT  
TAACCCGAGGGCAACCCCATCGCACCTACTGTAAATATGACTGTCCACACCCGTTCTTCTTCAACCAACCC  
ACAACACCCGAGCAGGTTCCAAACCTCACCGTCCAAGAGATCGAAGAAAAACGCAGAAAAATGCCGCAAAATGG  
GGCTGCAGGTGGCAACAAACGCCAACGATCGAAACAAAACGCCGCTCCGCCCCGTCGCCGAACAAACACCCGCACA  
ACCCACACAATCAGTCCAACCAACCCACACAATCAGCCACGCTACAGCAAAATCAGATGCACCAACTACAACA  
AATACAACACCAGTTACAACAGCAACACATGCAACACCAGCAACAACCCCACTTAGCGGGCCAGATTCCACAAGT  
GACACAGCCACATTTGCTCACACAACCAACCCACCCATGTGCACCAATACTCCACCCAAACCAACCCACACA  
ATCCACAGTTCTGGTCAACCAATCTTTCAGGCACGAGTACACCACTACACAACCATAACAACCTACTCCCAC  
GTATACAACAGGGCCTACGTACGGTACACCAACCACTACACCACTCCACAACAGGGATTACGTACGCTACAGC  
TTACACACCCCCACTTATGCCAACCTACCTCCACACCTAGCACCTACACAACAGCCACCCCGGCACTACCTA  
CCCAGCAACTACCACCTTCAACAACACGACGACACCCGGAACGTATACTACCGCGTACCCCGGCACCACGCCCGC  
GGCAACGTACGCAACGATGCCAGCAACTACTCCAGCTGGTGCACGTACACGACCGCTGCCACGTACAGCAACGTA  
CGCGGCACCCACAGCCGCGGACCATTCACCACAGCACCAGCGGGCTCCACCTTTCAGGGGCTCTCTGCGACGTA  
CATCTCCGAGGAAATCTGCGGGCACGTTTGCCACACCTGCCTCGACCCGTACACGAACCTCGGCTGTGGGATA  
TTCGCCGAGGGTATGGTTATCGGAGTTCCGCAACAGCCAACAATGATAGGAACAATACCTCCAAACGCTCTCAA  
ACCCCGCGCAGGGCAACCAACACGGGCGCATCTCGCCCCGGGGCACTGCGCAGTCTTCCCCGGGCACTGCGCA  
AAACGCGGAGCTGCTCGCAATGATGTGCAGTGCAGTTCCCTGCGTCCACGAACGCAGTGCAGGGCGTGCTAAT

GCGCAAAGACTTGACTGAGGAGCAGCGCCTGGAAGCCGTGCGCAAGATTATGAGCGAGCACACTCCCATGTGAtc  
ttgcttctcgtgttattgtatgttaaagtagtgtacactttgtgaa

>Phypoly\_transcript\_09236\_PpSWC2

attgagatttaaacatgtctaccagaagtttatatatacttacatttgaatattaaggagggggaatattacacca  
gaaattgaaaaatcatcaaacagcttagttcttcagaaaatattgagatttacaa**ATGTCTACCAGAAAGTTTACC**  
**ATCCCGCTCCACAAGGGGCAAAAGGATGAACGCGCTCGTTGGGGATGATGCGCTTGTAGATGAAGAGTTTTGGAA**  
**AATGGATATGTTTAAGGAAGATGAAGAGGATGATGAATATAAATCTGAAGCAGAGGAGGAAGATATCATCGATGC**  
**CGATTTTCGACAATCCAGAGGAGGCCGAGT**cagaagaagaagttgaagttgccaagagaaaaaagaaaaagaaaag  
gatggcctatgtagatccaaaagctaaaaaagggccaaaaCGACGGAAAGATCCAAGATAAAAGCGAAAGCACTCGA  
CGCAGAACTACTAAAGGGGCCGAATCGGACGTGGAAGTGATCATGGACGAAGAACCATAATGAGGAAAAAGGCGA  
GGCGCCAAAAGCCGAGCCCAAAAAGGAAGGGGAGGCAGACGAAAAAGACGCCCAAGCCCTAGAAAATCCCGGA  
GGGCGAGGAAGGGGCTGATGCTGCGTCACCCCCCTAGCACCCCCGGCTCAGTCCCTAACACACCTAAATCCACGCG  
CAAGTCCACGCGCGCAGTAGCTATTCAAAGGGCCGAGCAGCGAGAAAAAGGAACGAGAAGAAACAGAGAAAAAGAG  
GTCACAACGGTCAAGGAAAAGATCTCCTGTGGTCTGTCGGCGCATTACACAGGAAGAAGTACTAGAAAGCAAAA  
AATGACCGAGATTTATAATACAGAGTCTCTAAATATATTCTGTCTATGGAAGAAGAAAAGAAGATAAAGGA  
AGCACCCACAATCGTAGGTCCAGCAATAAAATATTACTCAAAAGACGGCAAAACGTGCGTGTGTTTTGACGAGTT  
GCCCCGACGTTTTGGCTTCAGCCCCGCCACCCCCATCCCGCGAAATTTGCCCAATTACTGGCCTTCCAGCGAA  
GTACAAGGATCCCAAAACAGGAATTTGTTACGCCAATTTGGACGCGTTCAAAACACTTCGCACCAAGCTACTACA  
ACAAGAAGAAGCAGAAACCAATTTGAAAATTTGCCAGTTGACCGCCTTGTGCAAGAATCTAAACGAAAAAAGA  
TCAATTACAAAACACGCCCACGGGAGTTTTGGTGTGAaggaaactttttattagatttgggtgcatggcaggtaggt  
taggctcggctaagctaggctagtctagtctaaattttgcagagggacaaagataaagacggaagagagtaaggc  
atcttggcaaaggcttgggtggatttggaaatgtaccaaggtctttgtattgtattttatgtaaaatagttcacac  
tt

>Phypoly\_transcript\_00559\_PpSPT16

acagcgcaaggaaacctgttaccaagacc**ATGGCTGACAAGTCTGCTGAAGCTTCTGCAGGTTCTAAAAATACTA**  
**TTAAGCTAGACAGTAAGTCTTTTTGGAGAAGAGTAAAAGCCTTATATGATTCTTGGCAGAAAAAGATGATTATT**  
**TATGGAAGGGACCGGATGCATTGGTTATAGCACAAGGAACACCAGATGATGATAATCCGTATAAAAAAACAAATG**  
**CTTTGCAATATTGGCTTTTGGGATATGAGTTTGGCGATACCATCATTGTATTTTGGCAGTCAAAATATATATGTAC**  
**TCATTTCTCCGAAAAAATTGGATTGCTTGAAGTATTGAAGGAAGAAAAATGCGCCATACGTGTTGTGTTTTTGC**  
**AGCTTTCCAAAGCTGAAAAACAACAAAACCTTGAATACTTTATTCGAGGCTGTCCACAAGAGCAAAAGTGCGAAAA**  
**GCATTGGAGTGTTGCCAAAAGAGAAAAATGCAAGGAGCTTTGGGGTCACTTTGGGAGGAAGCGCTTGCGAAATCGG**  
**GGCTGACACTAGTGGATGTGGCACCAGGATACTCTGAAATGTTGTCTGTAAAGGATACTGTTGAAATGAACTCT**  
**TAAAAACAGCTGCAGAACTACTTCCAAAGTGATGTCAAATCTTAAATCCAGCTGTTGAACTGTGATTGATG**  
**AAGGAACACAGAAATCACACACTGCCCTAGCAGAAGAAATGGAAGAAGTATTGCTCAACCTGAAAAAATTAAT**  
**CTAAGTTGGTAGGTGAGCACGTGCAATCATGCTACATTCCAATCATTCAAAGCGGGGCAAAATATGACCTGAAAT**  
**TAAGTGCAACTAACGACAACGAGAATTTACACTTTGGCACTATCGTGTGTGCTCTTGGTGCGAGATATAAAGGAT**  
**ATTGTTCCAATGCAGCGCGCACTTTTTTTATAGATCCGAAAAAGGAAGTAGAGATCAATTATAGTTTTCTTCTTG**  
**AAGTACACAATATAGTAGTGAAATCCATCAAAACAGGTGTAAAAATATCGGTGATAATGGACAAAGCGACCAAAAT**  
**ATATTGCCGACAAGCGCCCTGAGTTATCCAGCTCTTTCTTAAAGTGCTGCGGTTATGGAATAGGAATTGAGTTCC**  
**AAGAAACGTACCTGATGCTCAGCAGCAAGAACACACGCACCATCAAACCTGGCATGGCTTTTAACATCATGGTAG**  
**GGTTTCAAAATCTCGAACTTAAGGAAGAGCCTAAAGACCCCAAGATAAAGTGATTCTATGTTGTTGGCAGACA**  
**CAGTGATTGTTAGTGAAACCGGAGAGGCGGAGGTTTTAACTAATTCTGTAAGCAAAAGATTGCGTGATGTCTCTT**  
**ATTTCAATTGAGGAGCTAGACAACGAAGAAAAGGCCTTGCCGACTACTACCAAGAAATCCTCTGCCACTGTGAAGA**  
**GCGAGAAAGCCGAGAAGCTTGATGACGCTTTCAAGAGTGCCACGTTTGACGGACCACGCTCTCGAGACCAGAAGG**  
**GCAAATCAAAAGGCTCGGAGGATAAGATAAAGAAAACATCAAGAAAGAACTAGCAGAGAAGTTGGCACGGGATCGAC**  
**GGAAAGGTGCAGACGAAGATAGTACCTCGGCTGGCCCTTCCACCGTCAAAACCTCCTCAAAAAGATATTGTGGCTT**  
**ACCCTGACACATCTGCATACCTCACGAAGCTCACAGAAACAAGATTTTGGTTGACCACAAGGCCGAAGCTATTTC**  
**TTTTGCCCATCTATGGGTATCTAGTCCCCTTCCACATTTTCGATCGTGAAAAATGCAAGCAAAACAGACGACTATC**  
**TCAGAAATCAACTTCGTAACACCCACCCAGGTCAATTGCTCAATCACAGGGCCAAGGAAAGGAATTGCTATATATTA**  
**GGGAGGTGACATACAGGATTCAAGACCAAGAAACCTTACAAATTCCTTGCTGCTCATCAAGCAACTGAGGAAGC**  
**AAGTGAGCGAGCGCAGCAGAGCAGCAATGTCATGGCCTGGTCTCCAGGACAACTTATTGTTAGTAAAA**  
**ATCCAGGAATCCCAAGCTCATGGGCCTCTTTATTCGTCCTAATATCAGTGCCACAGGACAGGTGGGACACTTG**  
**AAGCACATACAAACGGCTTCCGTTTTTCTACTGCAAGGGTACTACTGTTGATATTTTCAAGAAATATCAAAC**  
**ACGCATTTTTTCAGCCATGTGACCATGAACAAATTTGTTTTAGTGCACTTCCATCTTCACAACTATATCATGATCG**  
**GCAAAAAGAAGGCTAAGGATGTTTCAGTTCTGCACAGAAGTGATGGAGGGGTCATCACACTTAGATGGAAATCAC**  
**GTTTCATCATCACGTGATGAGATTGAGGATGAACAAGCTGAGGCTGAAATGCGAAATAAATCAACAGGGATTTC**  
**AGACTTTTGTCAAGCGTGTTGAAGAGGTTTCTGCCCAATCTGGCACTGAAATAGAGTTTGATATTCCGTTCCGTG**

AGCTAGGATTCTTTGGAGTGCCCTCCAGGAGTAATGTGTTCCCTTCAACCCCTCTGTGCATTGCTTGGTGAGTCTGA  
TTGAGCCCCCTTTCTTTGTACTGACACTCAAAGAAATTGAAATTTGCAACTTTGAGCGTGTATCGTTTGGGTTGA  
GGAACCTTTGATATGGTGTGTTTGTGTTCAAGGACTACGAACGACCAGTAACCAAAGTTAACAATATCCCCGTCGATT  
CCCTAGAGGCCATCAAGGAATGGCTTGATGAATGTAAACATAAAATTTCTACGAGGGCCCCACAAATCTGAACTGGA  
CCCACATCATGGGCACTGTAAGGCAGGACGTGGATCAATTCTTTGAAGATGGTGGCTGGAGCTTCTTGGAGGACA  
AGGACTCCGATGCAGGCGATTTCGTCACTCTGAAGATGGTTCCGAGTTTGAACCTGAAAGCAGCGGCAGTGGTGAAG  
AAGAAGAGGCCAGTGAGGATGATTACTCATCAGATTCCGATGCCTCAGGATCGGATTACAGCTCTGCTTCAGATG  
AGGAATCAGAAGAAGAGGGATTGGATTGGGAAGAGCTTGAGCGCAAAGCTGCTGCTGAGGATAGAGCAAAGAAAT  
ACGATGAAGATGAGCCTCCTAAGCGAAAGAGAGCTGGAGGAGCGTACTCGGACGACGAGGACGATCACCCCAAAT  
CCAAAAAACAGCAGTATCGAAGGGAGATAGTTTTGTCCAGAAATGGAAGCAGTGAGTGGTGCCAGAGACATCACT  
AAgtacccaggactggatattgttcttaacattcacatTTTTtatttctagccacccccccagggggttggtgtg  
gaggggtgggccccccactgaccagcacaaatttgtacatttgcaccaggcaaatggataatttcttgagctg  
aatcatttggagtgctgtgtgggctttattcataagcagtttggggggcatttgatagtagtaccactgtattcctt  
gtttgattatgatttcaagtgtcttgggtgtgttagaggggtgaatttgcTTTTgtgtagcagtttttttatcat  
caagcttatgtgaatctgtgctgggcatgtgtgtacttttatcagcaacttttgctaaagcattagctggtgtgtg  
gcacaaaaaatccatgcactgcactatattcacattcttgggacaataggccaggcttgacatgcttaagtactg  
aagcacacatataaattggcatcaaaggggaagtgttaaaaaacacatcaaacaatcgtgccacacaagtaacat  
catctaagttgtgtgcaaaccaagttaagacccaactaagcgcaaaaaaggggtgcacatgtgattcaacaatga  
aatgggaaatttttggctcaaataattgataataatggcacaaggtgatccaagtatgctataataataatccaagt  
taggtcgttaaggcatctctaattgtgaaaaagggacagtttttctaacattgcaaatgccaatttctcatcagtta  
ccattaagaaaacactagcaatgtcatgatatccctgaaagtatttcaaggtggggtgctcagaaagaacagcca  
aaataatatttgataactctttgcgcttctgagcaagtagcattggatcacccctctgtgaacttccacagtgatc  
tctccacatctctctccacttgatgcgctctgggtgttcttcttctgtattaattcagtgatgcacgaccatcag  
caggaatgcactcacactgctggatgccaaagtaagatgggcccaggcccttgcctgattgcattgttcaccagcc  
caccctctgttagtgcatattcaatcagtgctgcccgtgacacaggggggtgatctaacaataaacaatgcatt  
gggctttggaatctttggaacccttcatctattgcgcggtgtattgcggcaagaagaagaggagaatgtagttgg  
tggggcaagaaagtttgacctgcgtgtccttcggtgataataaaaaaaaaaagtgctggtgtgttt

>Phypoly\_transcript\_05191\_PpSSRP1

gtctttcttgtatcttgcctttcacacaccaacatacatatgattcatttttaattttgttttttaaaatattact  
aatgatatacatgttgtattatTTTTTcaaagtgcacatatttttgtgaataaaagtatgtttgtgtt  
gttttgtgtgaaatttgatgtgaatgtgagggcatgaacatgatggaaatgagaggtgcagctgtacaagagcga  
aaagaaaatgacgcaagaaatccattgcgtgggcagctttttattcgcaggtaggtctttaaaaatttagcgcaa  
caggttcccgcgcaagttgttcttccaa**ATGGCCACAACAGCACATCAATTCAACAACATTACCCCTTGGGGGTA**  
**GGGTTAGTAGTACAAAAGGTGTTCTTAAGGTGAACAGCACCATGTTCTTGTGGCGGACAGAAGCTGGAAGAGTGA**  
**TATCGGTACTTCCAACCTGACCTATCACAAGCTTTTTTGGACACGTATTTACGGAAGAGTATTTACAGCTCAAATTGC**  
**AGTTAAACATTGAAATTTCTATCAAATTTGATGGATTTAGAGAGTCCGATTACGATGTTTTGAAGACATTTTTGT**  
**CTGAAAATTTTCATGTTGAACTTACTACTGTACAATTAGCTACAAAAGGACTGAATTGGGGGGAATACGAATTAG**  
**CTGGACCTGTGATCACTCTCGCAGTTGACGGAAGCACGCTTTTGAAATTCCTGTTTCTGAAATTTCTGGTGCTG**  
**TAATGCAACCTACTCAAAAAATGAAGTTGCAATTGAATTTTCATCAAGATTCCACATTGGAAGATGAGGACGAAT**  
**CCCTTGTTGATATTCTGTTTCTTTATCCCCAATCGATCCACAGAAGAAGGAAGCAAGACATCAGCACAAATATTAC**  
**ACAAAGGACTGTTAGACGTAATTGGTGGTGGCATTCAAGGAAAAGATCGCATTGCAACTCTTAACAAAGTACCCA**  
**TACTTACTCCAAGAGGTGTTATGATATTGAACTTTATCCCACTTTTCATGAAATTCGTGGCAAAACACATGATT**  
**ACAAAGTCACTTATGAATCCGTATCTCGTCTATTCCAGCTTCCAAAGCCTGACCAACATCATATATTCTTTATTG**  
**TTACACTAGATCCCCCAATTGACAGAAGGAACAATGCGGTATCCTCACCTTGTCATGCACTTCAAAATGGACGAGA**  
**AGTCTCCTCCAGTACCTATCACACTGCCTGCAGATCTCAAAGAAAAAGAACAAATTAAGAGCTTGCCAGAGGAAT**  
**TCAAGGATGCAGATGCTTATGAAGTGGTTAACAAGTTATTCCGTGCTTTTACACAGCGCAAAATTACCACTCCAG**  
**GCTCCTTCAAGTCTCATTCTGGCGCTTCTGCTGTCAAATGCGCCTTCAAGGCTAATGATGGATTCTTTTTCTTC**  
**TCGAACGAAGCTTTTTCTTTGTACACAAACCTCCTCTGCATATGCGATTTGAAGAAGTCTCCAGTGTGGAGTTTG**  
**CACGTGTGGCATCAAGCACTAATGCACAGGCCAACCGTACGTTTCGATCTTGTGATTAGGCTAAGTGACTCAACTG**  
**TGCACCAATTCATGTCATTCAAAGAAATGAATACGGGTCTCTTTCAATTTTATTCAATCAAAGAAGCTTCGCA**  
**TAGAAAATCCTGATGAAGCAACTGAGGAATTGGCAGGGTTGGCAGGAGTGATCGGAGCAGATGATGATGAAGAAT**  
**CTGAGGAGGATGAGGACTTTGTTGATGAGGGTGAAGGAAGATGAAGAGTATGACTCTAATGAATCAGAAAGCG**  
**GTGAGGAGGCAGAAGAAAAGCCTAAGAAGGACAAGCACGAAGGTAAGCGCAAAAAATCAGACGGAGAAGAGAAAC**  
**CCAAGAAGAAAAAGAAGGCAGCGGAAGAAGAGGAAGACTAG**gggtgtgatcattttgttttaataactttaactgta  
tgtctattttccactaagctgtaaaatagtagtcttttacggggaataaattctcggttataatg

>Phypoly\_transcript\_13763\_PpSET



AGCGAGAAAAGCGCGAGAAAAAACCATGTATAATAAGCACGACATTGACCCGGATTCTTTGGACAGTTCTGCGA  
AGGCGATCTTGACAAATCTTTCCGTTTCAGCCTCTCGTTGATTGCCCCGATTGATTAGATTGGAAGCCTCCCGCAG  
ATCCAGAAGAACAAGTGCCGATTGCGGAAGTTCAAAACAAGTAGTTCCAGATAGTTTAAATGCCTGCTTTGATTT  
TGTACATTACACCCATCCAATGTCTCTACACAAAATTATTGAAGGTTTCCACTCTGAAAATACGCAAGTTTCCA  
AGCGCCAACTAGAGCTAAAAATACGAGAAATTGCCGTGAAAGTCAAAAAATCTTCGTGGCAGGTCCGAGAGGAAG  
TCGTCAAATCCTATGACGTCACACTACCCGAAATAATCGAGAGCAAACCCGTTCCGCCCCAAAACCCCCCAGAAAA  
ACATGACAGATTTCTTTGCCAAAGCCGCGCGCCAAAAATCAACCACCAAATTCAAACTCAAATCAAATTCAA  
ATTCAAACCCCAATTCAAATTCAGCACACCCACCAAAAAAACCCCAACCAAAAAACCCCCACCAAAAAACCTCC  
CCACACCCTCTTCCACACCCTCCCTTCCGAAAACAGCACAAAAAACGCACCTACCGAAAACGGATGTCACACGA  
CCCCAAAAGGAATATTATGGATATGTTTCAGAAACATCAAAAGACCCAGGGTTAGgttccactgcgtctttttg  
tttgtgtaattattttgaataatttcaaaaaataaaaatatcttgcgaaagt

>Phypoly\_transcript\_09859\_PpCAF1B

attaatttgaatttttagcggaagcaccagctacaatcttcttgtgcctggttgtttagtttatgctcccttagt  
tgcccttctttatgtcctagagttgtcttctgtgcaccataaaATGAAGGCGGACACTCTTATGGTCCTATGGCAC  
AGCAAGGAACCTGTCTTCTGTGGACTTTCACTCTTCTGGTAGACTTGCTTCAAGTGGTGCAGATAATGATATA  
AAGATATGGAATAATTGGAACCGTGGGATGGAAGTGTTCACCTTGATTTCTTGTCTAGCCTCACGAGACACACC  
AAAGCAGTGAATGTGGTTAGATTTTACCTGATGGAACCTTCTTGCCACAGGATCAGATGATGGATACATATAT  
ATTTGGAAGTTAAATACATCTGTGCCAGTATTACCCGATTCTATTGACAAAAGAGTGTGGTCCGTGGCTTATACC  
TTGAGAGGAAAAGCACAAGATGTGTATGATTTGGCTTGGTCCCCAGACAGCTCGCAGATCATTGTAGGTAGCACC  
GACAATAGTGCCTCTGTTTGGAGTGTGAAAGGAGCGCAATGCAAAACACCCTTTGAACACCACAACCATTACGTA  
CAAGGAGTAGCATGGGATCCTTTGGGAATATACCTTTTGACGTTTCAGCAGCGATCGCACGCTCCGCGCCTACACG  
CGAAAGCTCCCAAAGAACAAGAAGTCCACAAAGCCCTTCTTCCCCCTACCCCTTCTTCCGCTCCGCTCT  
ACCTCTTCTCTCTCTCCGACCCCCCTTCTCCCTGTCCCGGACCCCCCTTCTTCCCCCTCTCCCCCGTCCCCGCC  
CCAGCGCAAAACCCGCCCCGCCACGCCCAGCAAAAAACGGGTGAAAAGAAAAGTGGATCGTCGCGCAGCTCGTC  
AACAAGCGCGAGTTCCCGGGGACACAAGGGCTGCTCGAAAAAGAGAAAAGAAAAGGAAATCCGGTAAA  
GGAAAAGAGAAAAGAAAAGAAAAGGACTGTCTACAACACAAGCTATTTTTTGACGAAAGTGTAAATACATTTTTT  
AGGAGGCTCACATGGTCCCTGAGGGCTCCCTTCTGTTTCTTCTACTGGAATTCACAAAGCCTCCCTGCTCT  
CCTCCTACCAATGTATGTTATGCATTTTCTAGGAATAATCTTAACAGGCCGTTATTTTACATACCAAGCGGGAAA  
CCGGTTATAGCCGTGCGATGTAGCCCAATCCTGTACAACTGTGGAACGGCAAGCACCTTGGCAAACCAACCC  
CTCTCTACCTCTCCACCCCCCTCCACACCCTCCTCCGCACCCTCCCCACCTCCTCTTCTACCTCCCCACTCCC  
GCCTCCTCCACCCCTGTTTCTACCGATGCACCCTCCGCCCCCTACCTCCACACCCTTGGCACTATCCAGATACC  
CCGATGAGTGACTCCCCACCAACACCGCCCCCTACCCCCACCCCCACCCCTGCTGCCCCCTCTCCCCATCTCCCC  
CCATCTCCCTCCTCCCCCTCCCTCGTTTCGTGAAGCTCGATTACCGAATTGTGTTTGGCATCGCGACGGTGGATTG  
GTGGTGGTTTACGACACGCAACACTTACACCCCTCGCGTTTATGGGAGACATGCATTACGCGAATATGACTGAT  
GTAACCTTGGTCGGCTGACGGTTCGTCCCTGATCATGTCTCGACGGATGGCTATTGCTCGTATGCCACCTTCGCT  
CCTGGCGAGCTTGGCACTCCCTGGAAGAAAATGAGATACCAAGTTGTATGAAAGAGGCCATTTTACAAAAGACAG  
CAGAAAGCAGAGGAAGAGGAAGAGGAGCCAGCCATCATGCCTCCGCTTCTCAGGAACCAATGGAGAGCCATCC  
GCGTCCGCGTCCGCGTCTGCAGTCGCATCTGCGCCTGCCGCCACGTCCGAAGATACGGCTGATGCAGGCTCGCTT  
TTTTTTGGGAAGAGAAAAGAGATTCCCCAAATACTACCCAAGACCCCTCGCTCGCCAGCGCAAAACCTGCCGAA  
AAGAAGCCTCGCAGATTGGCTCCTACGTTTATTTCCGCTCTTCCCAATAAGTAAgtaaaatgttaaagcggttg  
ttttaaggttaataaatgcacttaataactaaaaaaaaaaaaaaaaaaaaaaaaaaaaaaaaaaaaaaaaaaaaa  
aaaaaaaaaaaaaaaaataaaaaagggtgatggggagggggtgggggtgggaaagttt

>Phypoly\_transcript\_09477\_PpCAF1C

cccacaacaagcaataaacgaggcgtgcgcagctttcccttcccgcgcatttgttgcaagATGGCCAAAGCTACT  
GAGGAGGAGATACCAGAGGCAGAGGAAAAAATTATAAATGAGGAGTACAAAAATATGGAAGAAAGAACGCACCATTC  
TTGTACGATTTGGTGATGACACACGCTCTTGAATGGCCAAAGTTTAACTGTTTCATTGGTTGCCAGACAAGAAAATA  
CAATCCAACAAAGAGTTTTCTGTGCAACGACTCGTTTTTGGGGACACATACATCTGATGCAGAACAGAATTACCTC  
ATGATAGCCAAAGTTACCTCCCATTTGGATGACGCAAAATATTGACCCACGTAAAATATGATGACCAGAAAGGAGAG  
GTCGGTGGATTTGGTGCAGTGAGCGAGAAGATAGAGATTGAACAACGTATCAACCACAGTGGTGAGGTGAATAGA  
GCTCGTGCTATGCCTCAAAACCCCTACTATCATTGCTACTAAGACGGTTACTTCTGATGTTTTTCTCTTTGATTAC  
ACTAGACACCCCTCAAAGCCATCAGCAGATGGAAGTGAACCCCAATGCCATTTTGAAGGGACACACAAAAGAA  
GGGTATGGTATTGACTGGAATCCTTCTCGCGAGGGCCATCTCCTTTTCGGCTTCTGATGATAAACTATTTGTTTG  
TGGGACATACAGATGCCAAAGCAAATACCACTATAGAGGCCAAAGCAAATCTTTAGGGGCCACAAAGAGTTGTT



GAGGATGTTGCCTGGCATTGCAGCCATGCAGACTATTTTGCTTCTGCTGGCGACGACAAAAAATTGATGATATGG  
 GATGTCAGGACAAATGCAGATCCACTGCAAGTAGAAGCACATGCTGGAGAAGTAACTGCGTGGCTTTTAAACCCG  
 TTTTGTGAGTTTCTTTTAGCTACTGGTTCTGCTGACAAGACTGTCGCCCTGTGGGATATGCGCAACCTCGATGCC  
 AAAGTGCATTCTTTGTCTCACATACTGATGAGGTATTCCAAGTGAATGGTCAACACACCAGAAACAGTACTG  
 GCCAGCTGTGGCTCGGATAGGCGAGTGAATGTGTGGGATCTATCTCGCATTGGTGTGTAACAAACAGCAGAGGAC  
 GCAGAGGATGGTCCCCCTGAGTTGCTCTTCATCCATGGAGGGCACACCTCAAAGATCTCTGACTTCTCTTGGAAC  
 TACAATGAGCCATGGGTGCTTGCATCTGTGGCAGAGGACAACATCATTCAAGTGTGGCAAATGGCAGAAAAATATT  
 TACAATGATGATGACACAGATGAAGCCCAGCCCTCCAATGAGGGGgatttggagtgatgtgtgggttaatcacc  
 tacttttcttttctctctttgtacacatagattaaattatatgttctttctgt

>Phypoly\_transcript\_01462\_HIRA

ggtttagagttaattgtatttttttaattttagtagcacaggaatataaaaaatgataagcagtttacatctctatttga  
 agtagcaaaagaacagctgcaatcttgtacacaatttgtgtgcaagtagataaacactatccaaccatcctggat  
 tcttgaatttcttcatcttctgttattgttgtatgaatgcttggacacagtgtgtagaaaagagctttcactggc  
 agaacgagcaatggacggttaacttgagacaaccagattgtgtaacacttgggtgtgggtgATGCCCCGACAAAGGA  
 AATAAATGCAATCCTTCACAGCCACGTGCTTGCGCGAAATTTGAAGATCAGCAGAACACAAGTTATAATGAACAA  
 ATGAGGATTTTAAAGCCTGATTGGGTACCCACACAGGATACCCAATATTCTCGGTAGACATTACCCAGATGGT  
 AGTCGATTTGCTACAGGAGGCGGAGACAACAAAGTAATCATATGGGCTTCTGCACCTGTACAATATGAGGAACAA  
 GAGGCCAACAAATTCATGCCACGAAAGCTTGACAGAGCTCACCTACCACATGTCTCTATTAGCTGTGTTAGGTGG  
 TCACACAACGGGCAATTTTATAGCATCCGGCTCAGATGATGCACTAGTGATGCTGTGGAACTCTCTTCAGGTCCT  
 GCGTCAAAAAGTTTTGGTTCAGATGAGCTCACTCAAGAAAAGTGGCGCTGCACCGCTACTCTTCGTGGACATTCTG  
 AAGGACATTACTGATGTTGCATGGTCTCCTGATGACAGTCAGCTCGCTTCGTGTAGTGTGGATAACGAAATTTTG  
 GTCTGGGATACTGCTAAAAATTCTGTAGTAGCAAAATTGAGTGGGCACACTGGATTTGTAAAAGGAGTGGCATGG  
 GACCCCATGGGGCGATACATTGCTTCTCAGTCAGAGGATAAGACAATGATAGTATGGCGGTGCTCCGACTGGAAA  
 ATCGAAACAAAATCGAAGAACCATTGTCCGGTCTGCTGCCACTACTTTTACAGAAGACCAAGCTGGTCCCCA  
 GATGGGCAATTCATAAGCTCTGCACACGCGTTAGCGGTTCAAACCATGTAGCCATGATCACAGCACGTGACACG  
 TGGCGGTCTGTGTGTGACTTTGTAGGCCACAAATTACCTATTGTGGTAACTCGGTTTAACTCCTGTTATATTGCA  
 GACACAGTCGCAATAATTATGGAGTGTGCCTAATAGGAGGGCAAGACAATACCATTCTGTGTGGACAACCATA  
 TCATCTCGTCTCTTCTGCTCTTAATTCTTGTGTTTAAACAGAGTGTGCTTGATGCATCATGGGCAAGGATGGA  
 TTCAGCTTTATGTGTTGCTCTACAGATGGGACAGTAGTATGGGTAGAATTTGCAAAAAGGAGAATTAGGAACTGCT  
 CTTTCACCAAAAGAAATGGATAAAGTGCTCAGGAGCATCTATGGTGACCATATCCTCTCTCGCCCCAAGAGCACA  
 GTAACAGTGGCAGAGGATCCCTCTCAGCTCTACCTCCCAAAGACCACTGCACCAATGAAACCAGTAGCAGCACAG  
 CCACCTCCTGTGCCTACACAGCAAGTAGAAACCAGATTAGCCAATGGCAAAAAGACGCATACAACCCCAATTTCTT  
 GGCAACATTGCTTCTACCACTGCAACCACTCCCTTCATCCCCCCCCCTACCCCTTCTCCTCCTCTTCTCCTCCTC  
 TCTACCCCTTTCCCTCTTCTTCTTCTCGTCTTCTCTTTTCTGCTCCCTCTGCCTTCTCCTCTTCTCCTCCTCCT  
 ACCCCCTGCTTACTGCTGCACAAGTGAATGGATTGCAGGTGCTGCCAACAGCTTGTCTATTAATGGCTTGATT  
 ACGTCATCATCTGTGAACAGCTCTGTGATGTCATCAGCTACTACAAATCACTCAACCACATCATCAGCTGTACCT  
 GTGTTTCATCCCTCCACCCCGCTCCCTGGTTCAAATCAACTTCACCTGTTGCTGTTGCGCACACAATCTCTCTC  
 CCAGATGTTGGAAAGAGGAAAGAAAGTGATGATGTAGTAGAAGTGCCACCACCAACAAAAAGCACAAAAAGAT  
 GAAGAAAGTGATAAAGAGAAGGGAAAAAGAGGCAGAAAAAGGGGACAAAAACAAAGACATAGAGGCAGACCACACA  
 AAAGAGAAAGAGAGGGAAAAAGGAAAGAGATAAGGATAGGGAGAAGGAAAGGAGGAGGCGTGAGAAAAGAAAAAGAG  
 AAGGAAAGGTAAGAAAGAGAAAGAAAGGAGCGGGAAGCAACAAAGAGAGCACAGGAGGGACAAAAAGAGCGA  
 CACATGTTGTCAAGGCTGCACATTGCACATGCACAACATGCTCCAAATTTATGCAAACTTATTTGGGAACCCACA  
 GGACTACAGTTAGAAACAAAAACAGAAGGAATGGGAACACAGGTGAGCTGCCGCAACACAAAAATTTCCACAGCAG  
 TTGTGGCGCTCATATTCTTGGAAAAGCTGTTTTGGTGTGTGGAATCAATCTTTTCGGCAGTGGCTATGGAA  
 GATTCTTGTGTATATATTTTTCAGCAGTTGGCAGATTGATATTTCTCCTATTCTATGAGTGTCTCCACTTTCA  
 TTTTATAGAGGCTAATAAAAACTTCTACTTGGCTGCTATTCTTCTGACTGTCTACTGCATGTGTGGAAATATAGCA  
 CAGCAATGTGCTACTATAACAGCACAACCAGTTAATATTTCTCCTCCTTCCAATCTACACATTTCCCATTTGGTG  
 CTCAGTGATAATGGCCAACCTGTAATAATTTGCTCTTCACATACATATGCATTTACACTGAGATGAAAGTGTGG  
 ATGAAAATCGACTCAGTGTCTTCCCTTCCACAGGTATAACAGATGGATTTTATCAAAATTAATGGCTACAACA  
 GAAAGTGGAAATAGAAATATTGCCACAATGACACAAGAAAGCGATGAAATGCTTGGTGGTTTACTGAGCATGGAA  
 TCACATCTTGCTGCTAGTTTAGTTGTTGGCTCTAGTGTAGAATACAAATATTGGCTGCTTACATATACCCGCTAT  
 CTTTCTCAGAAGCTGATGTCAACCGCTCACAGAATCTGCAATCTCTTAGGTCTTCCACCGGAAAAACT  
 GGCCCTGCCCCACCCCTGCACAGGGTAAAACTGGGAACCTTCCATATTAGGCATGGCAAAACGCGAGCTGCTG  
 CGTGAGCTGTTGCTATTATGTCTACGAACCGCAGCCTGCAACGTTTAGTCGCGCAGTTCCGTGAAGGCTCGAG  
 AGTATATCTAAATAAatgaagtaaccacaaatc

>Phypoly\_transcript\_03291\_PpUBN

>Phypoly\_transcript\_00351\_PpCABIN1

TGCATTTCAGGCAGAAGAAATACCGATGGCCATGGAATGCTTGAAGGATGCAAGGAGCTCTTGGCCGATAGCGGT  
ATTCCCATCATTTGGGTGCGCACATTGTACGCACAACCGCAATATTACTGCACAGGGAATCGAGCGAAAACTCCAG  
GAAATTTTCAGGACAGAACTATAACGACCGCGGCAGACCACTTCATGCGCGAGAACTACGAGCAAGTCGTGCGCA  
TCGCTCGAGCCTATCGCGCGTGGCTACCCCGAATCGGCGATAGAACTGACAGCAGGCAAAAAGGACATAACAAGC  
GCCAAACGAAATAGACTTAAATCTTCGATTTATTACACCAGGCGTATTTGAACTGAAGGATTTGAAGAACGCA  
TTCTGGTGTGCTGCGAGCGGATGCTCGCGGAATCACTGCCCCACTACAACATGCCCGAAATGCACGCCAACTTCCAA  
TCTCTGCTGGATTGTATTATAGCCACTGAGAAGCAAGCGCAGACATTAGGAGTCTCTCTGTGACCCCTGAACCTC  
CAAAAACATAAGAAAGCTATTATGGTCTTGGTAAAGAAATCAACTGTCCCTATGCTCGTGATAAACGGCGTGATG  
GTGTTTTACGCAATTGCATCCGAAAACATGACCCCGACGCAAGAGTGGTCCCTTATGCACCTAACCCACCACGAA  
CTTTTCAGGAAGAAGGCTTGTATTGCAAGATGGCAAATTTCTTCGCCGTTTTATCGCGCTGCTCATCCCGCTG  
CACTTCCCGGAGTCGGACGAGCCAATGAGCACGGAAGCTTGGAACTCCTTGCCGAATACCGAATCGACATAGCA  
ACGGAATTGGCTCAATGCATTTGGTGTCTTTACGGCATAAAAACCTCCACCCAAAACATAGACGAGCACGCGCACAAA  
ACGCAACAAAACACCGCGAAGCGCGAAGAGCTCATGCTGATTTTCATCCTCGCAAGACGTATTTATCAGGACAAC  
AAACAAAAGCTTCCCAAGGAGACGAAGGATGCACTTTCCAAGCTCTACTCCTCCTTCAAAGATCCCCCGGAAAGA  
GTCACCCCTTTAGTAAAGGAAATCGAAAGATATCTGATCGATACCGAAGCCCGCCTCTCCTTGCAAAAAATAAAC  
GAGCTCAAAGCCGAGCATTCCGCGAAGGCCAACAGTTACCGTGCGGTGCTCGGAAAATGGACCGAAGACTCGGAA  
CCGGAGACTGAGCAGTTTGACCTGGCTTCTAATCCCGATTGCGATTTTGTATATAGAGATTTGTATTATATGATG  
GCACTTACCTACCCAGACTCGGACTCAGCCTATGAAGAATTGATTAAGAAAGATTTATTCTGCAACCCGTGGCAG  
ATTGAATCGTGGGTTGCTCTTGGGGTGATGCACCTACGCAACCTAGTGCTGCTCACCAGAGAGAAAGCGTTTTTC  
TTCCCTAATCAGCCTCCGTTGGTGGTTTTCCGTGGAAAATTTGAATCGGTTGTGCGATAAATGCCCTCTCACAAGCA  
CTAGAGCTGGATGGCGAAAGAGAGGACCTGTGGAAGGAACTCGGCCTCCTGCTCTACCAACAACACAAGCACATC  
CTCCTCCCGTCTTAccccctttcttccccctctccctcttttaccctcttctcctcctcgccctccccctccttcc  
tctcttctctctctctctcggaACCTAACACCTCGCCCAATGACTCAATTACCGCATCGAACGCCGAACCCGAAAAA  
GACACGAGCGACGATTTCCAAAAGAGGAAAGAACTCGTCGCGCGCGTTTACGAGCGCGCTGCGTCTGTGCTTCAA  
CGCGCGTCAACGCTCAATCCCAAAGAAATGGTTATATCCACAGATGCTAGGCAAAATAAGCGAAAAATGCGGGAAA  
CCCCTCAAGGAATATTAAACATTATACCGTTCTGGATCGGAAATGCGGAAGAAAGAGGAACCTGAACCACTGTAC  
CGCCTGCACGCTAGCAGCTCAAACCTTTTACTACGAACCTCTACACTTAGTGAAGCTAAGATGGAGGAATTAGAA  
CAATTTAACTTCGCACCTATTGAAAATCCAAGTGAGCTTTTCGCATGAACAGAGGTACAAAAAACTTGTCACTGAT  
TGTCTGGCCGCAATGGAAGAATGCAAAAACGACTACAAATGGTTCCACAAATCCGTTTACATGGTGTGCATACACT  
TTGAAATATGGGCCAGAACAGACGTGAAAACGGCGCAGAAAGCTCTCAGCTTCCCTTTTCAAGCCCATGAGCCAG  
AATTTCTGGTACATTTGGAAGAAAGAAAGGATCAGAAATTCACCGGGGAAAAATGGACCAGTACAGAATAAAGTAC  
ACAAAGTTATTGCTTGTCTGCTGGAGGACAATGTAGACAAAAGCGCACTGGAAAACCTGCTTGTCTAAAAGTGAAG  
AGAGACCCCAAGTGCGTGGAAGTGGGCTTGGTTGAGGATACTTTTGTGCTTCTGTGCGGTCCAAGCTATTGTA  
ATCCAGCAACTATCAGAAACCTTAAACAGCAGCGTCCCTCCCCCTCCCTCACAAGACTCTTTGCCCAACCCC  
TCCGAACCTCTGTCAATCCAACCTTCTCTTCCGAAACCTCACCCACCTCTACTGCTCAAACCTCTACCGCTATT  
CCGGCAACCGAAGACTTTACCTCTTCTTCTGTCTCTTCTTCTACCCAGCTACTTCTACTCCCCAACCTCTTGCT  
TCTGCTATCCCTCCTTCTGCCTCCTCTACCTCTTCAACTATCCCTTCTGCATCTCCTTCTATCCCTCCCTCTACG  
ACCTCCTCTTCCATCATCTCGCCTCACCTGGAATCGCTCGAAAAAATTTTACTGAACGCGTGGGAGAGCCACAG  
GAAGCCAATACAAAAAATCGCGCGATGCAGGACCTCGCTAAccaagttctagaacaagccttttaatttatatat  
ggcatacggccaagaccaaataatgccaactgacgaaccaactgatatcctacaagcggttctcagttttgoga  
aagaagtttgccaagggaagaagacgaaaaagaaacagactctaaagatgcaaacaagaaagacggagccgcacc  
acgaagaagaaggaaagtgaagaaaaagagaaacctacaaatgaaccaccacaaagcgaagaaatggaaattga  
ttcttcacaaaatgcgcctcccggtgtagatacatTTTTTAAAAAACCGTgcccgttattataaaaaaagccata  
aaagttcgaattttacatcaccg

> S3S101K5\_5354\_LULU\_Contig588\_N11D4\_PpNASP

gcgcgcaaaacttacaaagaATGAGCACAAACAAGAGAAGATGGTCAACCTCTAGAGGGTGGATCAAACACAACCAC  
TACCACCACAACACTAGCACAACTACCTCTCCCCAAGAGACCGCTGTAGAGGCTGGCGCCTCCTCTTCAGAGCC  
CAAAGAATAACCCAGAAAGAGGCGAGCGAAGAAATATGAAGAAGCAAAGGCTTTGTTTAATGAAGACAAGTACGC  
AGAAGCTTCTGATTTATTTGCGGATGTGTTGACCCACAAGGTTGCTGTCCATGGCGAGCTAGGGCTAGAGTGCGC  
TGAGTGCTACTTCTTGTATGGAAAGTGTCTATTCTTGCAAGGCAAAAAGCAGAAAAGCTCCGTGTTCCGTGCCACAGC  
ACAACAAAAAATAAATGAGGATGACGAAGACAGCAGCGATGAAGAAGACGTACCACCAGTTGGTGAGGGAGGAGA  
GAAAACCGAAGGAAAAGAGCTAGAGGAGAAACAGAGGATGTAGAGAATACACAAGTCGCGTGGGAGACCCCTCGA  
AGTAGCCCGACTAATTTACGAGAAGCACCTGAAAAAGCGGCCGAGTTGTCTGACACCCGATATGCATTGGCAGA  
GATCTTTTTTGGAAACAGATAATTGCAATGACGCCATCGAAGAGTTCAAAAAATGTGTGTCTTTACGCGAATCGAT  
CTTTGTTTCTAATGACAGAAGGATTGCTGAAGCTCACTATCACCTTGGACTCGCGTATTTTTTCGACGGACAGACC  
AGCAGACGCACACTTCCACTACTCGAAAGCCGAGACGTGCTCGATTGCAAACTGAAGTCACTTCTCCTTGGCAG  
TGCAGAAATCGAGGACATAAAATCCATTTTGGAAAGACTTGGCGGCTAAAAATGGAAGAAGTAGATCCAGCCATTT  
GGCCAAAGAGAAAGAAGCCACCGAAAAATGCAATAAATGGCACGACAAAATGGAAAGGGCAAGCACCCGCTCCTC  
ATCCTCATCTCCGCTCCCCCTCCTCATTTCCCAAAGAAGAGACCGGCTTCGCGGCCCCCATCTTCGACAAGAC

ACAACCAGTCACGAGGTTTGGTGTGGTTGGTAGCTCAGTAAAACGTGCTACACCTGTCACCGCCTCCTCTTCCTC  
CTCTTCCTCTTCGTCCTCCTCTTCTTCTTCCACTCCCTCAGCCTTCCAAATCGCTTCCGCTTCTCTTCATCCTC  
ATCCTCATCTCATCCACAACCCCATCTCCTGCACCACGACCGGCCCTATCATCTCCGGAGAAAAACGAAAACT  
GGAGGACATAATGGGAGGAGAAGAGGGATTGAGAAGCGAACGAAAAACGCAGGACACAGTATGTGAAACCAGAAC  
ATGAataaacctgcttcgtagctaaaccaaaccggtacataagcgcaagtacttccagga

>Phypoly\_transcript\_05212\_PpXRCC1

gttgcgcgaggacgcatgggcttttacactaatcatgcaccaaacatgaatcattttctccttttagttgATGGC  
AGAAACCTGCTGTGAGTTCAAAGTGATATCAGTCTCCTCCGAAGATGCGGAGCAGAAAGCAAGCAACATTGCAGT  
GCAAGATTTGTATGCGACATGGCAAACAGAACCTGGAGAAGAGAAAGCAAGTATATTGTTGGAACCTACCAGCTGA  
AACAACTTGCATACTATCGAAATTGTGAATGCTGGAAGTACAAATGTAGAGATATACGTGACAACTCGGAAAA  
CCAGCAGGATGAAGAAATCTTATTACCAACTGCTATCATGATGACTCTGGGCGAAGTGAATAGCAATACTAACAC  
CAATCGGTTACGATTTTTTTGGACCTGACAAGCTCACAAAAGGAATATCGGATAAGGCGTGGAAATACATAAAGAT  
CGTATGCATATCATTGACACTTCTAGGAAGCCCTTTGGCTTAGCTCGCATTTCGCCCTTTTTCTCCGCTCCTTC  
TGACGAATACATTGCTTCTCTATTGCCGACAACCGCTCTTCTATGGTCTCCGTTCCCTCTTCTCAACCTACCAC  
CTCAACTTATGTACCTCAAAGTATGCTTCAAGGAGCAAGTCTTTTGGGGGCCACCTCCTGATACCACAATAGC  
CCAGGACACAAACAACAAAAGACTCCAAACCATACAAACACAGCCAACAAATCCAACAATAATAATCGTACAAA  
CGACACAAACAACCTACCGGCCAAGTCAGCAGCAAAGCGCAAGAGGGTCATCATGAATGACGATTATGACGATAC  
AGAAGGCGATTGAGCGAAAGACCAAAACCCACGATCCCTCACTTCTTACACATTTCCTTCATGTGAAGAAGAG  
CGTACCAGTAGCAAATAGGTGCAAATCGCTTGTATTTACCTCATTTAACAAAATATTGAGCGGCGTTTCGTTTGT  
AGTTTCCGGCATCGCTAACCCAGAGCGACAAGAGCTGCGAGATAAGGCCATAGAAATGGGAGCCCAGTATTACGC  
AGATTGGATCGAATCTGCTACTCATCTTATTTGCCCATTTACCAACACTCCTAAGTTTATTTTGGCCCCAAAAGGC  
AGGTGGTACCATTGTCACTCCAGCATGGATTTTAGACTGCTATAAAAAACAAAGTGCGCCTTCCAGAAACAGAATA  
CCTATTAGCGGAGGTGAAGAAGATCGACGACGCGGGGATGAAAAGCACCATGGGCAACATGCGCGATTGGCTCGC  
TACATTTAGACCGAAGTTTGACAAACCCGCAAATAATAGTACCAATACTACCCAATCCCAACCTCAACCAAACT  
AACAAAATCCCTAACATTTGTTAAACACGCCCGAATCACCAAGGACTCACAAACAGAAAGCTGACGTCGATGATAC  
CTCTTCCGTCAGCACTGAACCGATGAGCGACGACGAAAAACAAATAATGACAAAGAACCCCCAACCAAAATGTA  
CAAAAAAGATCGGTGGTGAAGTAGCGCCCTTACAGACACCAAGGAGGATATGGGACCAACTCAAGATAACGTTTA  
CTTCTCGACAAGCGAAGACGACACATATCGACAACAAAGGACAATACGAAAGGACTTCCAAGTGAACAAACC  
CAAGAAATCCGGCGTTTTTTGACATCTCAGCACCTTTGCCGAATATTTCAAGAACATCAGGGTTGTATTATATGG  
CAACTTCGACCCCGCTTTTGAACCACTTCTGTACCGATACGTGACTGCTTATTCTGGAGAAATAGAGGATAAGCC  
GACTAGCAAGACAACCTCACATTATAACCAACCAATTGTGGGATAAAGAAATTGCAACAACCTGCGAGACGAATATCC  
CTCAGCATGTATAGTAAGACCCAGTTGGGTGTTTGTATTGCGACAACGAAACAAAGAAAGGTGGAAACCAATTTGCA  
CAGTACACAAACGGTTTAAcaaaacttgatctcttttattttaatgtaaaatatttctaaggc

>Phypoly\_transcript\_12278\_PpNHP6A

tatcttcccgaacacatttctactctgacttgaaagttgacatgtgtataaagtagtttcgaaacaaagaattgta  
gcgaatcttcaaagatatatcaactcgagaattgtagcgaaagggacatacaacgagtattctgcgaaaatgcaaa  
tgagttagcgagaacttctatcttctttttcaaacattgttaaaagcctgcagccggtctttcgagttctattgttct  
ttctgcttttattctgctataATGGGAAGGTGAATCTCAAGCTCCTGAGGATATGGTTAAGGAGGAAGCAAG  
GACACTGGTAAGAAGAAGAGGAGGCAAGAAAGCGGTTAAGCAACTAGTGAAAGCCGAAAGCTCCAGCCAAAGAGAC  
AAGAAGAAGGTTGACGCCAAGGAGGATAAGAAAAAGAAAGACGCCAAGGATGACAAGCAGAAAGAAAAAGAGAG  
GAGGCGGAGAGCGAGGAGCAAGAAAGCGACAAGGAGGAGGAACAGGAGGAGGAAGACGGCGCGGAGACCAAGGCT  
AAAGACAAGACCACGGCCAAAGGGAAGTAGGAGCAAAGAAGGCGACTACCAAGGAGAGCAAGCCCCAAGAAAGAG  
AAGGCCGGGAAAGACAAGAAAGACAAGAAGGACAAGACGGAAGAAAGGTAAGGATCCCAACGCCCCCAAGAGG  
CCCCAGACAGCGTACCTTATCTTCGCAAATGAGCAACGTGAAACCATCAAGAAGGACAACCCAGCTTTTCTCCG  
CCAGACATACTGAAGGAAGCTGGAGCACGCTGGAAGCGCTCACCGACAAGGAAAGAGGAAATACCAGGATAAG  
AATGAAATAGAGAAGCACAGATATAAGAAAGAAATGGAGGCCTATAATGCGAATGGTGGCGAGAAAGACACTGAT  
AAGAAGGGTGCGAAGAGGAAGAAGGGCGAAGAGGAGGAAGAAGAGGACGAGGAAACGCCAAGCCGAACAAAGAG  
GCAGCCGCAGCAGACAAAGGCAAGGCAAAACCGAAGGGTCTCCTTCTCGCAAAAGCAGGGGCGAAAAAAAGTAG  
agtccacgaccgaagagtgtaaggatgtaatttgccaccgacacctctgacgaactaatacgcgtacgtgtacatact  
atacaataaaaaccagacttatattt

>Phypoly\_transcript\_14313\_PpNHP6B

aaacgtcgtcaaagagccggcatgcgagcaaccctgcccgtgagcagcccgctATGGATACTCCCAAAGAGTGCCC  
TGCCAAGGAGGACGCCCTGCTGAGAAGACCGAGCAGCCTGCGCCGGAGAAGAAGGAGGCCGAGAAGGAGGAAGG  
GAAGGAAGGCAAGACGAGGAGAAGGACGTCAAAGTTAGCGAGAGCGAGGAGGAGACCCCTCAAAACAAGAACCCAA



## 2. Detailed analysis of the chaperone structure

### 2.1. The H3/H4 chaperones involved before chromatin incorporation

**PpHSP90** harbors 4 domains: (i) the N-terminal ATP-binding domain with high conservation, (ii) the glutamic acid-rich (20% in the PpHSP90 linker) and charged linker that is less conserved, the highly conserved (iii) middle and (iv) C-terminal domains (Figure 3A). **HSC70** interacts with H3 histones right after their ribosome exit as well as with H4 and HSP90 [5,6]. As other HSC70s, PpHSC70 presents the 3 general structural domains (Figure 3B): (i) a NBD (N-terminal Nucleotide Binding) domain containing an ATPase domain, (ii) a SBD (Substrate-Binding Domain) domain divided in SBD $\beta$  and SBD $\alpha$ , the latter acting as a flexible lid and (iii) a flexible linker connecting NBD and SBD [96]. Overall, the HSC70 is well conserved across species, SBD $\alpha$  being more divergent (Figure S6F). In PpHSC70, we noticed the presence of the EEVD motif (Figure S3F, red box) involved co-chaperone binding [96].

The **NASP** proteins frequently present two isoforms corresponding to splice variants but *P. polycephalum* only present one splice variant and only one NASP orthologue is present in studied organisms excepted in *C. elegans* which contain two paralogues. NASP is a protein that bound H3/H4 constituting a reservoir of soluble H3 and H4. The PpNASP protein presents 4 TPR and one SHNi-TPR (Sim3-Hif1-NASP interrupted TPR) repeats as well as a "E/D-rich" region (Figure 3C). TPRs are involved in H1 and H3/H4 binding [25,26]. Moreover, PpNASPs presents an "E/D-rich" region that interrupts the TPR2 and is involved in H1 binding [25], this region being larger in human (Figure 3C) and mice NASPs. Besides, PpNASP presents a well conserved SHNi-TPR (Sim3-Hif1-NASP interrupted TPR).

The nuclear translocation protein **IPO4** is associated with the cytosolic multiprotein complex involved in H3.1/H4 dimer nuclear import [7]. Another model has been proposed in which H3 and H4 are bound as monomers to IPO4 in the cytosol before being translocated to the nucleus and being addressed in the nucleus as dimers by the NASP, ASF1, p46<sup>RbAp46</sup> and HAT1 complex [97]. Excepted *Drosophila* that presents tandem duplicate genes giving rise to Artemis and Apollo proteins [98], *Physarum* and studied organisms present one single IPO4. PpIPO4 contains an importin- $\beta$  N-terminal domain and two HEAT repeats (Figure 3D). Acetylation of K5 and K14 residues of the histone H4 increased affinity with IPO4 [99] and facilitates histone nuclear import, notably in *P. polycephalum* [8] and in yeast [100].

The **ASF1** is highly conserved from yeast to mammals. Two isoforms exist in mammals and plants but *P. polycephalum* contains only one isoform similarly to yeast or *Drosophila*. Alignment of ASF1 proteins confirmed that the N-terminal is highly conserved (50-60% of identity regarding the first 155 amino acids) while the C-terminal is rather divergent and smaller than in yeast similarly to other

metazoans (Figure S6). Moreover, the C-terminal contains several acidic amino acids - mainly glutamate - as it was reported in other organisms [101] but to a smaller extent.

## **2.2. The H3/H4 chaperones involved in chromatin incorporation**

The CAF-1 complex comprising 3 subunits, named PpCAF1A, PpCAF1B and PpCAF1C in *Physarum*. **PpCAF1A** harbors 4 domains: (i) the A domain involved in ScCac3 interaction and flanked by (ii) the “E/D-rich” domain enriched in glutamic acid (E) and aspartic acid (D) involved in H3/H4 interaction, (iii) the KER domain rich in lysine (K), glutamic acid (E) and arginine (R) involved in ScCac2 interaction and (iv) a PIP2 domain (Figure 4A). Besides these domains, Hs-p150 also presents PEST, PIP1 and C-terminal domains as well as the HP1 motif. The PEST domain - rich in proline (P), glutamic acid (E), serine (S) and threonine (T) [102]- is absent in *P. polycephalum*, yeast and plant proteins (Figure 4A). The CAF-1 large subunit associates *via* the PIP domain (PCNA-Interacting Peptide) with PCNA (Proliferating Cell Nuclear Antigen) which triggers CAF-1 recruitment to the replicating sites [102]. While animal CAF1A proteins display two PIPs (PIP1 in the N-terminal region and PIP2 in the KER domain, proteins from the other analyzed organisms only present PIP2 (Figure 4A). Besides, Hs-p150 and ScCac1, respectively harbor a p60-binding and a WHD (Winged Helix domain) involved in DNA binding without sequence specificity [103,104] in their C-termini (Figure 4A). **PpCAF1B** harbors several domains: (i) WD40 repeats involved in the interaction between the middle subunit of CAF-1 and the H3/H4 histones and ASF1 [103] and in the interaction with the large subunit of CAF-1 [105], (ii) a PEST domain comprising a B-like similar domain to the HIRA B domain and (iii) a PIP domain. WD40 repeats are clustered at the N-terminal except one in the C-terminal region for PpCAF1B, ScCac2 and AtFAS2 (Figure 4B). Most animal CAF1B proteins contain two B-like domains (B-like 1 and B-like 2) located in the middle and C-terminal regions of the PEST domain for Hs-p60 while *Physarum*, yeast and plants only display B-like 2 (Figure 4B). **PpCAF1C** harbors 2 domains: (i) two H4-interacting regions located at the N- and C-termini and (ii) several WD40 repeats in the internal region (Figure 4C).

The HIR complex comprising 3 subunits, named PpHIRA, PpUBN and PpCABIN in *Physarum*. **PpHIRA** presents three domains: (i) the N-terminal region composed of several WD40 repeats involved in the UBN1 interaction [106], (ii) the B domain involved in ASF1 interaction and (iii) the HIRA domain involved in CABIN1 binding [33] and HIRA homooligomerization [107] (Figure 4D). The B-domain and the HIRA domain are well conserved (Figure S8B-C). One should note that HIRA protein has two orthologues in yeast, ScHIR1 and ScHIR2 respectively homologous to the N- and C-terminal regions of HsHIRA (Figure 4D). Besides, HsHIRA was also reported to bind H2B and H4 [108]. **PpUBN** presents three domains: (i) a N-terminal domain named NHRD (N-terminal to HRD -

Hpc2p-Related Domain), the (ii) HRD and (iii) ubinuclein middle domains (Figure 4E). UBN proteins present similar domain organization across eukaryotes, except for ScHpc2; the human UBNs display longer C-termini (Figure 4E). The NHRD domain mediates HsHIRA interaction [106,109] through 5 key residues (R46/E53/K74 conserved in most species but E61/F62 only conserved in animals; Figure S8D, in blue). NHRD and HRD domains are located in the N-terminal region of UBN proteins excepted for ScHpc2 in which they localize in the C-terminal (Figure 4E). The HRD domain confers the H3.3/H4 specificity to the HIR complex whereas the ubinuclein middle domain is able to bind both H3.1/H4 and H3.3/4 [32,110]. HsUBN1 also presents a DNA-binding domain which participates in HIR-mediated histone deposition in chromatin [111]. We did not find this lysine-rich domain in PpUBN. As other UBN, PpUBN presents a ubinuclein middle domain which is absent from ScHpc2 and DdUBN (Figure 4E). **PpCABIN1** presents several TPR and TPR-like repeats and HsCABIN1 a MEF2-binding domain (Figure 4F). These TPRs are sufficient for the HsCABIN1-HsHIRA interaction [18]. This MEF2-binding domain was retrieved only in animal CABIN1 (CePICD-1 excepted). The TPRs are sufficient for the HsCABIN1-HsHIRA interaction [33] and HsCABIN1 and HsUBN1 can interact together [109].

### **2.3. The H2A/H2B chaperones**

Proteins of the **NAP** family have various functions beyond their roles in chromatin assembly. ScNAP1 participate to the H2A.Z/H2B variant exchange [15] and AtNRP proteins counteract SWR-C activity in Arabidopsis [111]. More generally, NAP proteins are able to bind H2A/H2B and H3/H4 histones (reviewed in [13]). **PpSET** and **PpNAP1L1** harbor a N-terminal tail of variable length and an acidic C-terminal tail as most NAP proteins. Sequences participating to the NAP hydrophobic core and protein assembly [13] are highly conserved in both *Physarum* NAPs (Figure S9A-B). Finally, the NES and its key residues as well as the NLS [112,35] are conserved only in PpNAP1L1 (Figure S9H-I, Tables S5 and S6). The **FACT** complex is composed of two subunits SPT16 and SSRP1 (or ScPob3) and contributes to chromatin dynamics during transcription, DNA repair and replication. This heterodimer deposits H2A/H2B dimers, H2A.X/H2B dimers and H3/H4 tetramers into chromatin but not H2A.Z/H2B [19]. It also disrupts interactions between core histones as well as DNA/histones interaction, notably during replication. It is thus able to bind either nucleosomes or free histones. **PpSPT16** present four domains: the (i) N-terminal, (ii) dimerization, (iii) middle and (iv) C-terminal domains (Figure 5B), based on the homology with HsSPT16 [113]. N-terminal domains are conserved across species (Figure S10A) and present an aminopeptidase-like “pita bread” fold [114]. Moreover, they are binding modules for H3/H4 in fission yeast [115] and human [116]. The SPT16 dimerization domain enables formation of the FACT complex through an interaction with the N-



terminal/dimerization domain of SSRP1 [117] and presents some similarities across studied species (Figure S10B). The middle domain presents a double pleckstrin homology structure in yeast that is able to bind H3/H4 [39] during nucleosome dynamics operated by FACT and it is conserved across studied species (Figure S10C). Besides, the H2A/H2B minimal binding domain defined in ScSPT16 [39] is poorly conserved across species (Figure S10D, green square) but its key residues are either conserved or substituted by an amino acid of similar properties in animals and *Physarum* (Figure S10D). Finally, the C-terminal domain is an intrinsically disordered region involved in mononucleosome binding and weakening of interactions between H2A/H2B dimers and H3/H4 tetramers [118]. **PpPob3** is the orthologue of ScPob3, the second yeast FACT subunit. SSRP1 proteins display 5 domains: (i) a N-terminal/dimerization domain with a single pleckstrin homology structure [113] involved in dimerization with SPT16 [117], (ii) a middle domain with a double pleckstrin homology structure [113] involved in DNA binding [119], (iii) an HMG (high-mobility group) domain flanked by two intrinsically disordered regions, the (iv) IDD (Intrinsically Disordered) and (v) C-terminal regions (Figure 5C). However, ScPob3 and PpPob3 presents only three domains (Figure 5C) similarly to *T. thermophila* and *D. discoideum* [37] orthologues. The N-terminal region of the HMG domain is involved in DNA binding in human [120] and yeast [121].

#### **2.4. The DNA replication-associated histone chaperones**

**MCM2** is a component of the DNA replicative helicase MCM2-7 complex. This complex is loaded on double-stranded DNA during late M and G1 phases and participates to DNA unwinding during replication. Moreover, MCM2 can associate with H3/H4-ASF1 during replication [12] and with the histones-FACT complex during transcription [40]. Besides, MCM2 can bind all H3 isoforms (H3.1, H3.3 and CENP-A) [41]. We analyzed the amino acid composition of PpMCM2. The PpMCM2 protein displays an acidic tail (33% aspartate and glutamate in the first 186 amino acids) as the other eukaryotic MCM2 orthologues (~30% for the human, yeast or Arabidopsis MCM2; [40]). PpMCM2 displays five domains: (i) a HBD (histone binding domain), (ii) MCM N-terminal, (iii) OB(oligonucleotide/oligosaccharide)-fold, (iv) MCM and (v) AAA+ that confers the ATPase activity (Figure 5E). The DNA polymerase  $\epsilon$  also named **PolE** is responsible for DNA synthesis on the leading strand during replication. PolE3 and PolE4 are its small subunits. HsPolE3 and HsPolE4 promote H3/H4 dimers and tetramers deposition into chromatin during replication [122]. ScDPB4, the yeast PolE3 orthologue, interacts with the histone chaperones ScHIR1 and ScNAP1 and is involved in heterochromatin silencing [123]. PpPolE3 presents a histone-like fold (Figure 5F) with 4 helices similar to H2A and H2B ones and an acidic C-terminal (Figure S13A).

## **2.5. The chaperones associated with histone recycling and exchange**

**SPT6** is present as one isoform in most organisms such as *Physarum* but *Arabidopsis* presents two isoforms, AtSPT6 and AtSPT6L. The former presents a very low expression level in most tissues while the later displays a wide expression [124] and its chromatin localization was studied [125]. For this reason, we only included AtSPT6L in our study. PpSPT6 presents 8 domains. Interproscan did not retrieve the HtH DNA-binding domain in the *Arabidopsis* protein (Figure 6A, [125]). The N-terminal region of SPT6 is involved in histone interaction. The core region is composed of: (i) 3 DNA-binding domains HtH (Helix-turn-Helix), HhH (Helix-hairpin-Helix) and HHH domain 9, (ii) the YqgF domain from the ribonuclease family and (iii) the S1 RNA-binding domain (Figure 6A). The C-terminal region of SPT6 is involved in the binding to the Ser2-phosphorylated RNA Polymerase II thanks to the SH2 (Src-homology 2) domain. Moreover, AtSPT6L presents a plant-specific WG/GW domain required for Argonaute interaction and small RNA-mediated gene silencing [126] also present in PpSPT6 (Figure 6A). To perform chromatin remodeling, substitution of nucleosomal canonical histones by histone variants, the so-called “histone replacement”, takes place. The H2A.Z/H2B variant exchange is performed by the **SWR-C** complex [15,14,16-18] which destabilize the chromatin to allow the ATP-dependent substitution of H2A/H2B dimers by H2A.Z/H2B dimers. **PpSWR1** is the *Physarum* orthologue of ScSWR1, DmDomino [127] or AtPIE1 (Photoperiod-Independent Early flowering 1, [128]). To note, two orthologues ScSWR1 have been identified in human, HsSRCAP (Snf2-Related CBP Activator Protein; [129]) and Hs-p400 (400KDa protein, [130]) as well as in mouse, fish and xenopus. Several members of the SWI2/SNF2 protein family were first identified from genetic studies conducted in *S. cerevisiae* (SWI refers to yeast mating type *switching*, while SNF is an abbreviation for Sucrose Non Fermenting). These proteins behave as chromatin remodelers and display ATPase and Helicase activities. **PpSWR1** presents 4 characteristic domains (Figure 6B): (i) a HSA (Helicase/SANT-associated) domain conserved in studied orthologues; an ATPase domain split in two segments (ii) SNF2 and (iii) Helicase domains, both being highly conserved and responsible for SWC2 binding [131,45]; (iv) a well-conserved SANT (Swi3/Ada2/N-Cor/ TFIIB) domain in the C terminal. The HSA domain is located at the N-termini of most proteins excepted for p400 ones which harbor a longer N terminal (Figure 6B). The AtPIE1 N-terminal region binds to H2A.Z but not canonical H2A [18] and the N-terminal region of ScSWR1 is responsible for H2A.Z binding [45] but residues identified in yeast for their role in H2A.Z binding [46] are not conserved across studied species. Besides, some SWR1 orthologues present a SANT domain while SCRAP, yeast, *C. elegans*, *T. thermophila*, *A. trichopoda* and maize proteins do not (Figure 6B and S15D). Instead, SRAP proteins have A/T-hook motifs and harbor a long spacer between the SNF2 and Helicase domains (Figure 6B; [132]). Moreover, p400, DmDomino

and DdSWR1 proteins present polyglutamines in their C-termini downstream of the SANT domain (Figure 6B) while PpSWR1, AtPIE1 and PpaPIE1 do not. **PpSWC2** is the *Physarum* orthologue of ScSWC2 and of animal YL1 proteins, which are present in both SRCAP and p400 complexes [16]. The ScSWC2 N-terminal region binds H2A.Z [57] and is responsible for DNA recognition [133]. Similar to ScSWC2, PpSWC2 contains ~40% of charged residues. PpSWC2 presents N- and C-terminal regions characteristic of SWC2 proteins as well as the Z domain (Figure 6C). **APLF** belongs to the Aprataxin and PNK (polynucleotide kinase) family which are DNA-break response factors. This family is characterized by the presence of a FHA (ForkHead-Associated) domain [134] which interacts with the DNA-damage repair facilitators XRCC1 (X-Ray Cross Complementing group 1) and XRCC4. PpAPLF presents a single PBZ located at the very end of the protein while HSAPLF has tandem PBZ domains (Figure 6D).

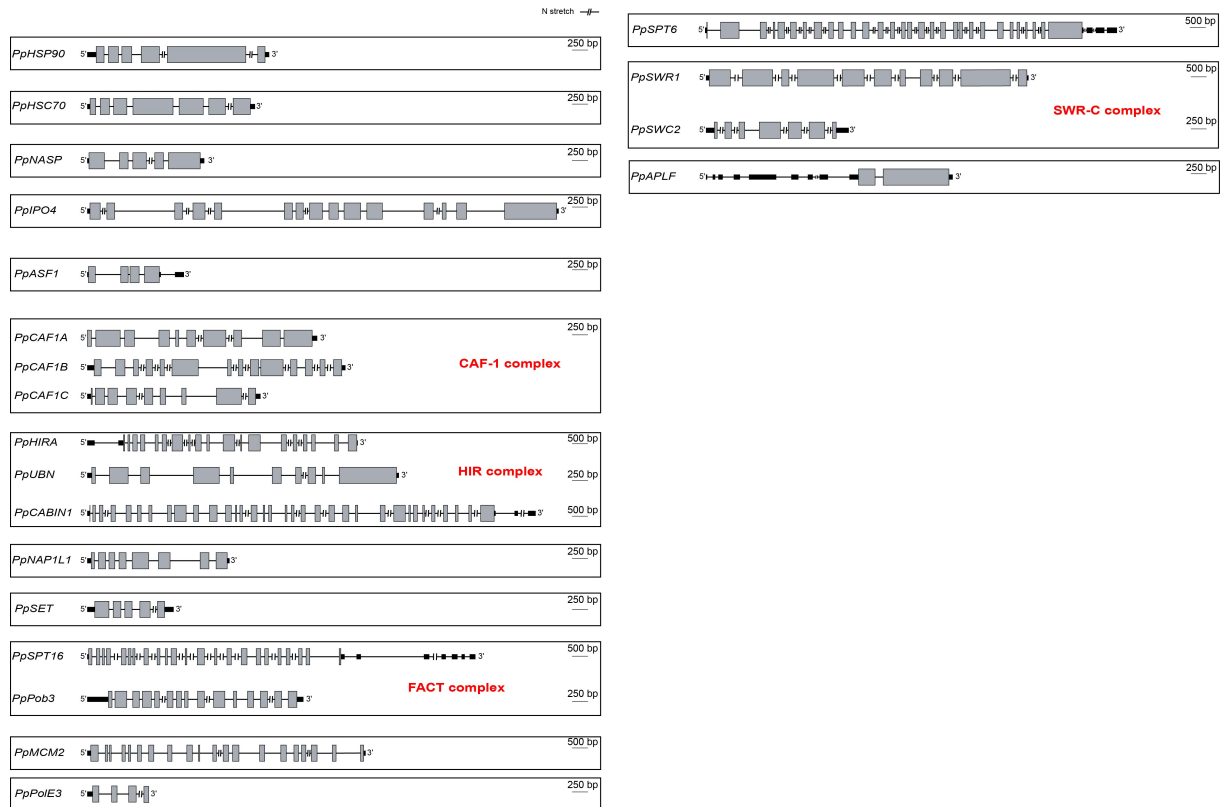

**Figure S1.** Structure of the various *Physarum* histone chaperone genes. Exons, grey rectangles; untranslated regions, black rectangles. Presence of N stretches are indicated by an interrupted line as indicated on the top right of the figure.

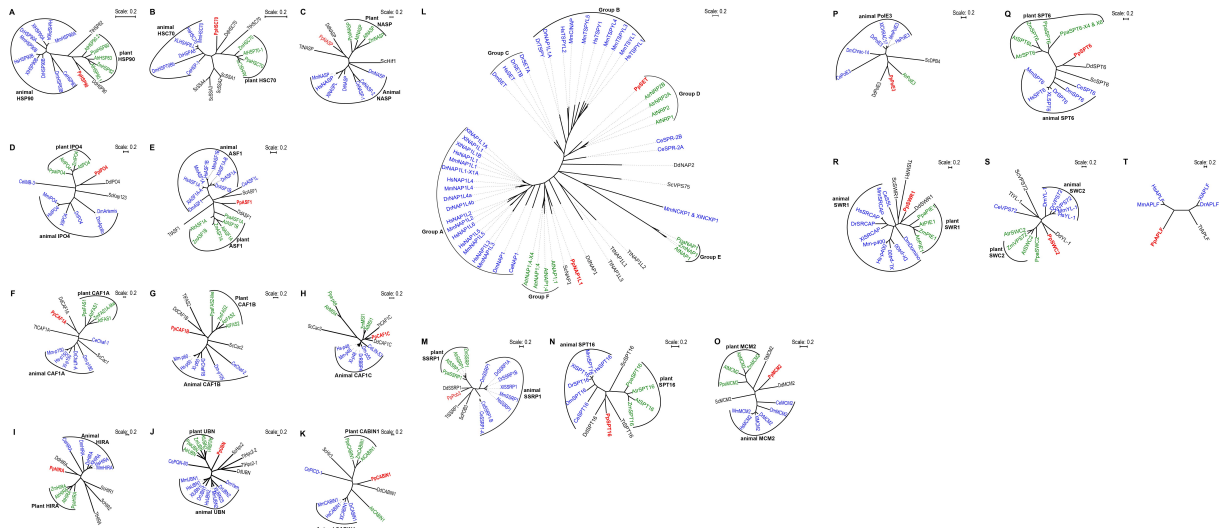

**Figure S2.** Phylogenetic trees of *Physarum* histone chaperones. Phylogenetic tree of the chaperones HSP90 (A), HSC70 (B), NASP (C), IPO4 (D), ASF1 (E), CAF1A (F), CAF1B (G), CAF1C (H), HIRA (I), UBN (J), CABIN1 (K), of the NAP family (L), SSRP1 (M), SPT16 (N), MCM2 (O), PoIE3 (P), SPT6 (Q), SWR1 (R), SWC2 (S) and APLF (T) from *P. polycephalum* and various eukaryotes. The NAP family (L) is very large and displays a complicated phylogenetic history. Given the high number of NAP proteins in the selected organisms, we condensed highly similar copies in each of the species (between 92 to 99% of identity over the whole protein). All the animal NAP protein cluster together into a group that we named group A, the ScVPS75 protein being found in this group. The animal TSPY proteins cluster into a group that we named group B. The SET chaperones constitute a single clade that we name group C, excepted for PpSET which belongs to the same clade than the plant NRP proteins that are closely related to HsSET. The plant kingdom presents three groups of NAP proteins: (i) group D comprising the NRP proteins and PpSET, this *Physarum* protein presenting a longer branch suggesting a lower homology with the plant NRPs; (ii) group E comprising three proteins and arising from the same clade than the mouse and *Xenopus* NCPK1 but the long branches suggested a lower homology between them; (iii) group F comprising four plant proteins and PpNAP1L1 presenting a longer branch suggesting a lower homology. The three *T. thermophila* NAP proteins group together in a single clade as well as the *C. elegans* SPR proteins. We found two NAP protein in *D. discoideum* and both do not belong to any other clade and are not evolutionary related to each other. Atr: *Amborella trichopoda*; At: *Arabidopsis thaliana*; Ce: *Caenorhabditis elegans*; Dd: *Dictyostellium discoideum*; Dr: *Danio rerio*; Dm: *Drosophila melanogaster*; Hs: *Homo sapiens*; Mm: *Mus musculus*; Pp: *Physarum polycephalum*; Ppa: *Physcomitrella patens*, Sc: *Saccharomyces cerevisiae*; Tt: *Tetrahymena thermophila*; Zm: *Zea mays*.

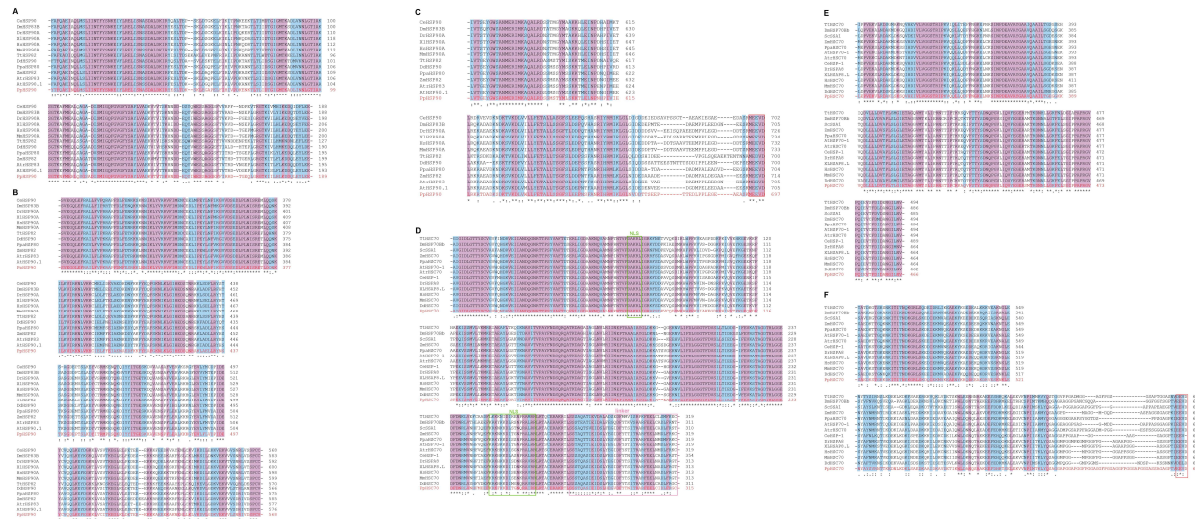

**Figure S3.** Protein alignments for the *Physarum* HSP90 and HSC70 heat shock proteins. **a to c.** Alignments correspond to the N-terminal (A), middle (B) and C-terminal (C) domains for the HSP90 proteins. The C-terminal region of PpHSP90 contains a strictly conserved MEEVD motif responsible for interaction with TPR-containing proteins [135] (C) which is displayed by a red box. Alignments are performed with HSP90 proteins used in the phylogenetic tree reported in Figure S2A, only one HSP90 protein per organism being conserved for an easier reading. **D to F.** Alignments correspond to the NBD and linker domains (D) and to the SDB $\beta$  (E) and SDB  $\alpha$  (F) domains for the HSC70 proteins. Two NLS (Nuclear Localization Signal) were reported in HsHSP70 [136], the first only being strictly conserved while the second one is less: both NLS signals are indicated by a green rectangle and the linker by a pink rectangle (D). The HSC70 EEVD motif involved co-chaperone binding is displayed by a red rectangle (F). Alignments are performed with HSC70 proteins used in the phylogenetic tree reported in Figure S2B, only ScSSA1 being used among yeast homologues for an easier reading. The *Physarum* proteins appears in red. Positions refer to the mature protein with the initial methionine. Asterisk indicates a fully conserved residue labelled with a pale pink rectangle. Colon and dot indicate conservation between residues of, respectively, strongly and weak similar properties and are labelled with a pale blue rectangle. Atr: *Amborella trichopoda*; At: *Arabidopsis thaliana*; Ce: *Caenorhabditis elegans*; Dd: *Dictyostellium discoideum*; Dr: *Danio rerio*; Dm: *Drosophila melanogaster*; Hs: *Homo sapiens*; Mm: *Mus musculus*; Pp: *Physarum polycephalum*; Ppa: *Physcomitrella patens*, Sc: *Saccharomyces cerevisiae*; Tt: *Tetrahymena thermophila*; Zm: *Zea mays*.

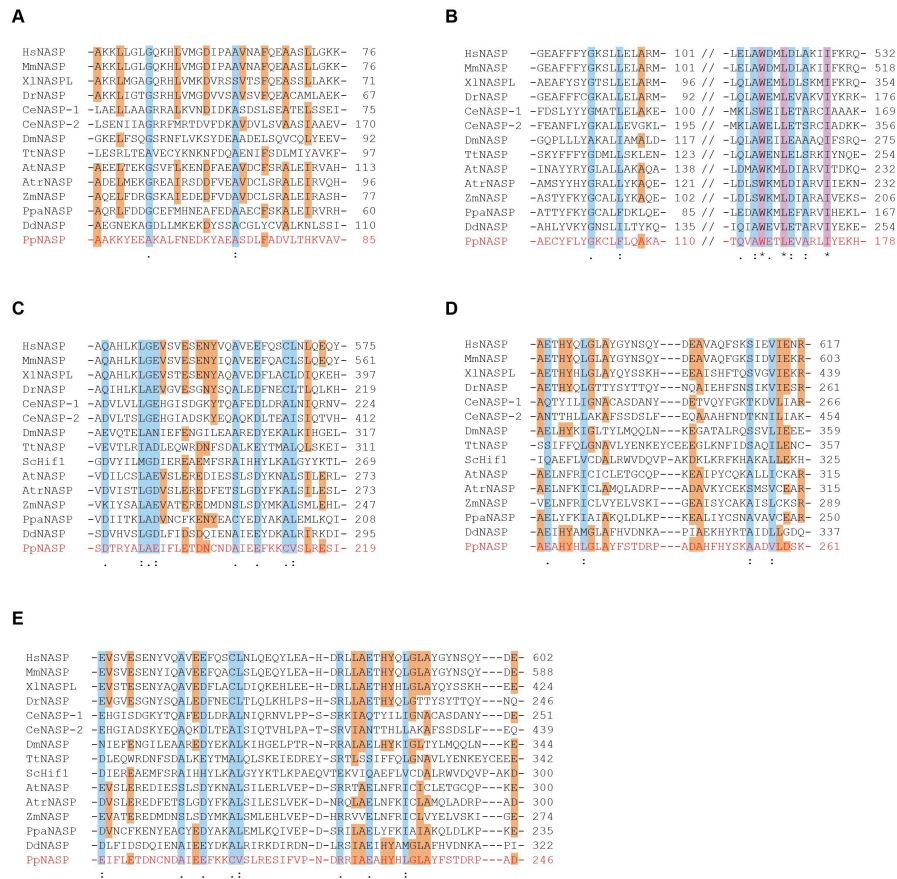

**Figure S4.** Protein alignments for the *Physarum* NASP protein. Alignments correspond to the TPR1 (A), TPR2 (B), TPR3 (C), TPR4 (D) and SHNi-TPR (E) repeats for the NASP proteins. Several TPR residues were previously described to be almost unchanged through evolution [137] which we could also observe. Alignments are performed with NASP proteins used in the phylogenetic tree reported in Figure 2C. ScHif1 was removed from TPR1 and TPR2 for an easier reading. For the interrupted TPR2, the TPR2-1 and TPR2-2 alignments are displayed together and separated by a double slash. The *Physarum* protein appears in red. Positions refer to the mature protein with the initial methionine. Asterisk indicates a fully conserved residue labelled with a pale pink rectangle. Colon and dot indicate conservation between residues of, respectively, strongly and weak similar properties and are labelled with a pale blue rectangle. Almost conserved residues are labelled by an orange rectangle. Atr: *Amborella trichopoda*; At: *Arabidopsis thaliana*; Ce: *Caenorhabditis elegans*; Dd: *Dictyostellium discoideum*; Dr: *Danio rerio*; Dm: *Drosophila melanogaster*; Hs: *Homo sapiens*; Mm: *Mus musculus*; Pp: *Physarum polycephalum*; Ppa: *Physcomitrella patens*; Sc: *Saccharomyces cerevisiae*; Tt: *Tetrahymena thermophila*; Zm: *Zea mays*.









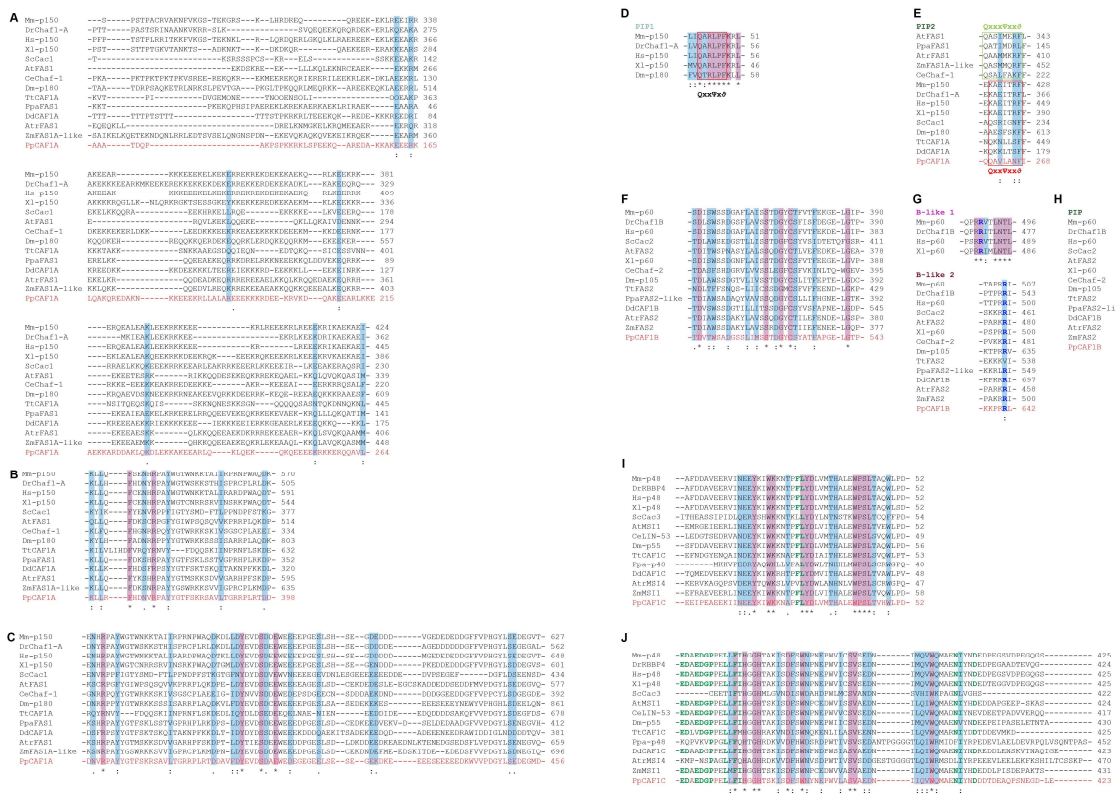

**Figure S7.** Protein alignments for the *Physarum* CAF-1 complex. **A** to **E**. CAF1A Alignments correspond to the CAF1 domain (**A**) involved in the interaction with ScCac2, the A domain (**B**) involved in the interaction with ScCac3, the E/D rich region (**C**) involved in the interaction with H3/H4 [139], the PIP1 (**D**) and PIP2 (**E**) boxes. Alignments are performed with CAF1A proteins used in the phylogenetic tree reported in Figure S2F. **F** to **H**. CAF1B alignments correspond to the PEST domain (**F**) which is strongly conserved for the studied organisms, the B-like1 (top) and B-like 2 (bottom) domains with the key residues for CAF1B binding to ASF1 depicted in blue (**G**), the PIP box (**H**). Residues R483 and R499 from Hs-p60, respectively located in the B-like 1 and 2 domains, are involved in the interaction between Hs-p60 and ASF1 [9]: these residues are displayed in blue in **g** and both are highly conserved. The PIP domain of PpCAF1B is more degenerated in sequence compared to the ones in CAF1A proteins (**G**). Alignments are performed with CAF1B proteins used in the phylogenetic tree reported in Figure S2G. **I-J**. CAF1C alignments for the CAF1C proteins correspond to the N- (**I**) and C-terminal H4-interacting regions (**J**) with the key residues for CAF1C binding to H4 depicted in green. Based on the crystal structure, several residues were previously identified for their role in the interaction with the histone H4 (F29/L30 and F367/I368 in **i** and I407 of the Hs-p48 hydrophobic patch in **j**; E356/ D357/ E359/ D360/ G361/ P362/ L365/ N406/I407/ D410 in **j** that form hydrogen bonds with specific residues of H4). These residues are displayed in green (**I** and **J**) and they all are strictly conserved in PpCAF1C. Alignments are performed with CAF1C proteins used in the phylogenetic tree reported in Figure S2H. The *Physarum* proteins appear in red. Positions refer to the mature protein

with the initial methionine. Asterisk indicates a fully conserved residue labelled with a pale pink rectangle. Colon and dot indicate conservation between residues of, respectively, strongly and weak similar properties and are labelled with a pale blue rectangle. Atr: *Amborella trichopoda*; At: *Arabidopsis thaliana*; Ce: *Caenorhabditis elegans*; Dd: *Dictyostellium discoideum*; Dr: *Danio rerio*; Dm: *Drosophila melanogaster*; Hs: *Homo sapiens*; Mm: *Mus musculus*; Pp: *Physarum polycephalum*; Ppa: *Physcomitrella patens*, Sc: *Saccharomyces cerevisiae*; Tt: *Tetrahymena thermophila*; Zm: *Zea mays*.

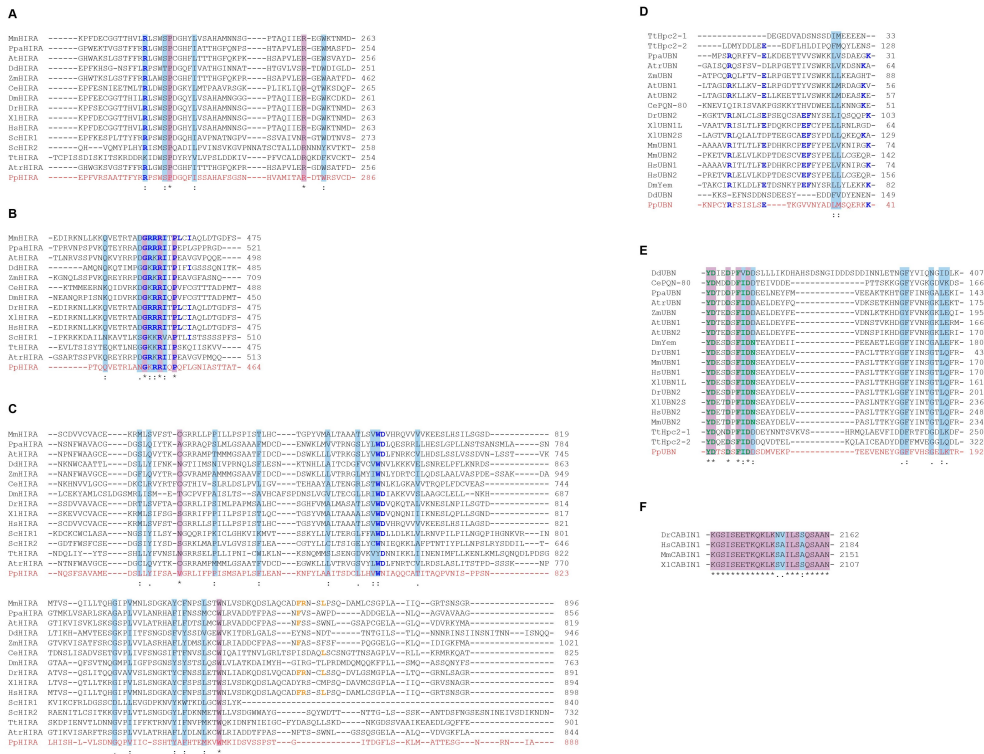

**Figure S8.** Protein alignments for the *Physarum* HIR complex. **A.** Alignment correspond to the N-terminal domain for the HIRA proteins. The R227-HsHIRA residue is involved in HsHIRA-HsUBN1 interaction [106]. This residue is displayed in blue and highly conserved. **B.** Alignment correspond to the B domain for the HIRA proteins. The GRRRIxPLxI (with x is any amino acid) motif is involved in ASF1 binding [9] and corresponding residues are in blue. This motif is highly conserved except the last isoleucine. **C.** Alignment correspond to the HIRA domain for the HIRA proteins. The W799/D800-HsHIRA residues reported for their putative role in homooligomerization [107] are depicted in blue and those for CABIN1 binding (with the N-terminal region of CABIN1 containing TPR repeats, [33]) in orange (F870/R871/L874-HsHIRA). Only alignment of the beginning of the HIRA domain is displayed since the end is less conserved. Alignments are performed with HIRA proteins used in the phylogenetic tree reported in Figure S2I. **D.** Alignment correspond to the NHRD domain for the UBN proteins. Several residues (R46/E53/E61/F62/K74) were identified in the HsUBN1 NHRD domain for their role in the interaction with HsHIRA [109]. These residues are depicted in blue. **E.** Alignment correspond to the HRD domain for the UBN proteins. The HRD domain confers a specificity for H3.3/H4 binding and key residues were identified (Y132/D133, D136, F138/I139/D140/N141) for their role in histone binding [32]. These 7 residues are displayed in green. Alignments are performed with CAF1B proteins used in the phylogenetic tree reported in Figure S2J. DrUBN1 was removed from the NHRD alignment since the sequence available in databases is truncated and does not have such a domain. ScHpc2 was removed from both alignments since both domains are localized in the C-terminal. **F.** Alignment correspond to the MEF2-binding domain retrieved only in animal CABIN1.

Alignments are performed with animal CABIN1 proteins used in the phylogenetic tree reported in Figure S2K. The *Physarum* proteins appear in red. Positions refer to the mature protein with the initial methionine. Asterisk indicates a fully conserved residue labelled with a pale pink rectangle. Colon and dot indicate conservation between residues of, respectively, strongly and weak similar properties and are labelled with a pale blue rectangle. Atr: *Amborella trichopoda*; At: *Arabidopsis thaliana*; Ce: *Caenorhabditis elegans*; Dd: *Dictyostellium discoideum*; Dr: *Danio rerio*; Dm: *Drosophila melanogaster*; Hs: *Homo sapiens*; Mm: *Mus musculus*; Pp: *Physarum polycephalum*; Ppa: *Physcomitrella patens*, Sc: *Saccharomyces cerevisiae*; Tt: *Tetrahymena thermophila*; Zm: *Zea mays*.



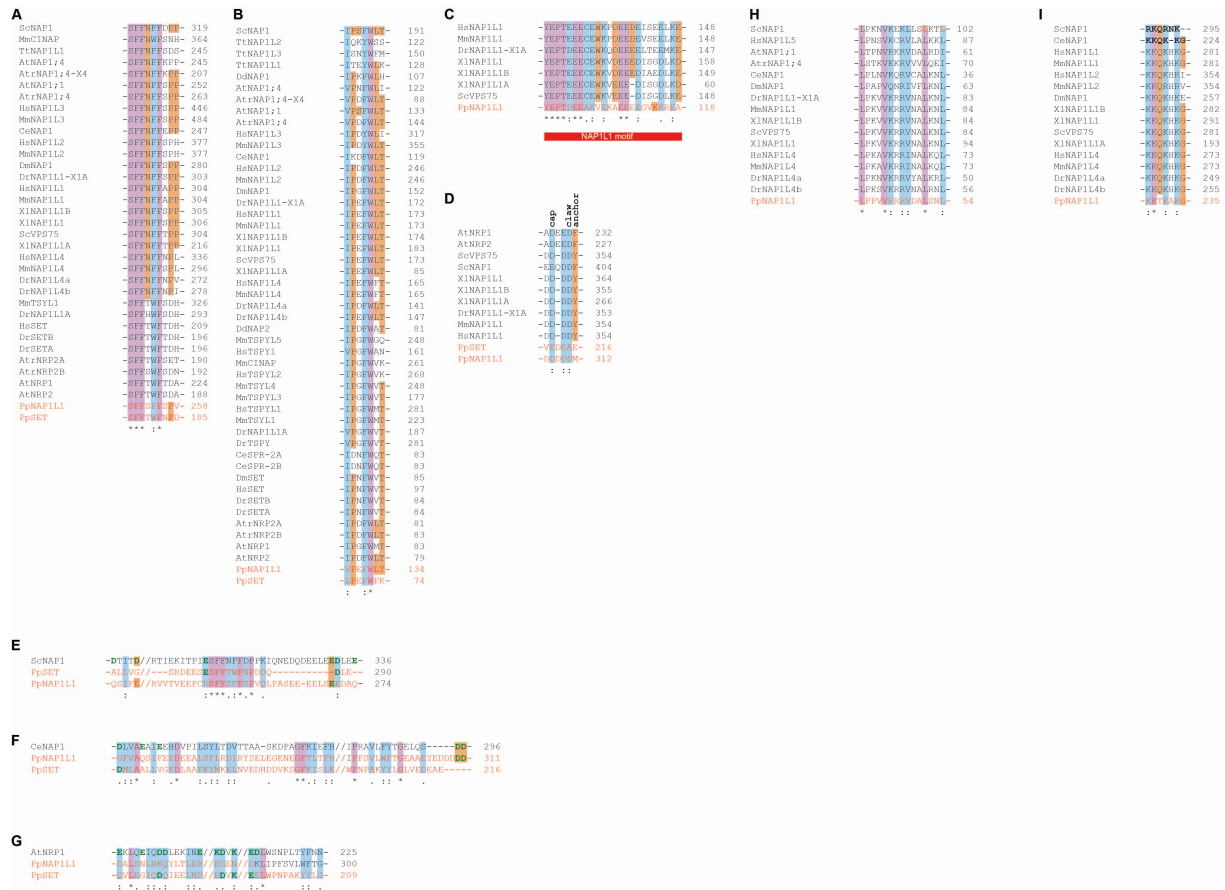

**Figure S9.** Protein alignments for the *Physarum* proteins of the NAP family. **A-B.** Alignments with the SFFNFFDPP and IPSFWLT sequences of ScNAP1 that participate to the NAP hydrophobic core and protein assembly [13]. Both sequences they are highly conserved among NAP family members, especially in PpSET and PpNAP1L1. **C.** Alignment for the NAP1L histone-binding motif [49]. It was retrieved in PpNAP1L1 but not in SET proteins since this motif is known to be absent from SET proteins. **D.** Alignment for the Cap-Claw-Anchor (cap residue: E/D/S; claw residue: D/E; anchor residue: Y/F; [34]) motif located in the C-terminal acidic tail of some NAP protein. This motif is also important for H2/H2B binding but only the cap and claw residues are conserved in PpNAP1L1 and PpSET. **E to G.** Alignments of the PpNAP1L1 and PpSET proteins with the histone binding modules of NAP proteins from yeast (**E**), *C. elegans* (**F**) and *Arabidopsis* (**G**). Mutation of residues D201/ D205/ E310/ E332/ D333/ E336-ScNAP1 (**E**), D125/ E129/ E132/ D295/ D296 of CeNAP1 (**F**) and K115/ D116/ K118/ E213/ D214 of AtNRP1 (**G**) reduce H2A/H2B binding [34,35]. Those residues involved are depicted in green and only few residues are conserved in *Physarum* NAP proteins which suggests PpNAP1L1 and PpSET present distinct surfaces for H2A/H2B binding. **H.** Alignment correspond to the NES signal for NAP proteins that present such signals. NES enables cytoplasmic localization [112]. Mutations of L99/L102-ScNAP1 prevent its cytoplasmic localization [112]: these two residues are depicted in orange and are conserved in PpNAP1L1 and in some other NAP proteins but not in PpSET. Those findings were further confirmed by predictions tools (Tables S5 and S6 for NSL and

NES). **I**. Alignment correspond to the NLS signals for NAP proteins that present such signals. AtNRP1 was removed from the alignment since its NLS signal is too divergent (**I**). In bold, are presented the NLS signals described in [35]. Alignments are performed with NAP proteins used in the phylogenetic tree reported in Figure S2L. The *Physarum* proteins appear in red. Positions refer to the mature protein with the initial methionine. Asterisk indicates a fully conserved residue labelled with a pale pink rectangle. Colon and dot indicate conservation between residues of, respectively, strongly and weak similar properties and are labelled with a pale blue rectangle. Almost conserved residues are labelled by an orange rectangle. Atr: *Amborella trichopoda*; At: *Arabidopsis thaliana*; Ce: *Caenorhabditis elegans*; Dd: *Dictyostellium discoideum*; Dr: *Danio rerio*; Dm: *Drosophila melanogaster*; Hs: *Homo sapiens*; Mm: *Mus musculus*; Pp: *Physarum polycephalum*; Ppa: *Physcomitrella patens*, Sc: *Saccharomyces cerevisiae*; Tt: *Tetrahymena thermophila*; Zm: *Zea mays*.

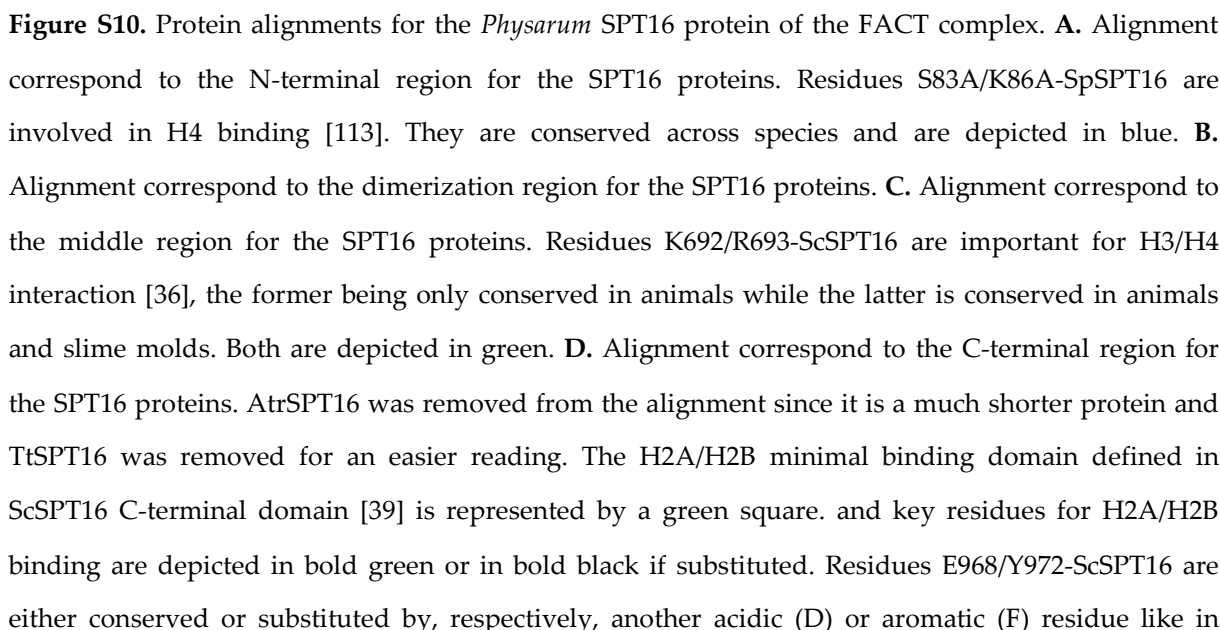



PpSPT16. They are depicted in green if conserved or in bold black if substituted to an amino acid of similar properties. Alignments are performed with SPT16 proteins used in the phylogenetic tree reported in Figure S2M. The *Physarum* protein appears in red. Positions refer to the mature protein with the initial methionine. Asterisk indicates a fully conserved residue labelled with a pale pink rectangle. Colon and dot indicate conservation between residues of, respectively, strongly and weak similar properties and are labelled with a pale blue rectangle. Atr: *Amborella trichopoda*; At: *Arabidopsis thaliana*; Ce: *Caenorhabditis elegans*; Dd: *Dictyostellium discoideum*; Dr: *Danio rerio*; Dm: *Drosophila melanogaster*; Hs: *Homo sapiens*; Mm: *Mus musculus*; Pp: *Physarum polycephalum*; Ppa: *Physcomitrella patens*, Sc: *Saccharomyces cerevisiae*; Tt: *Tetrahymena thermophila*; Zm: *Zea mays*.

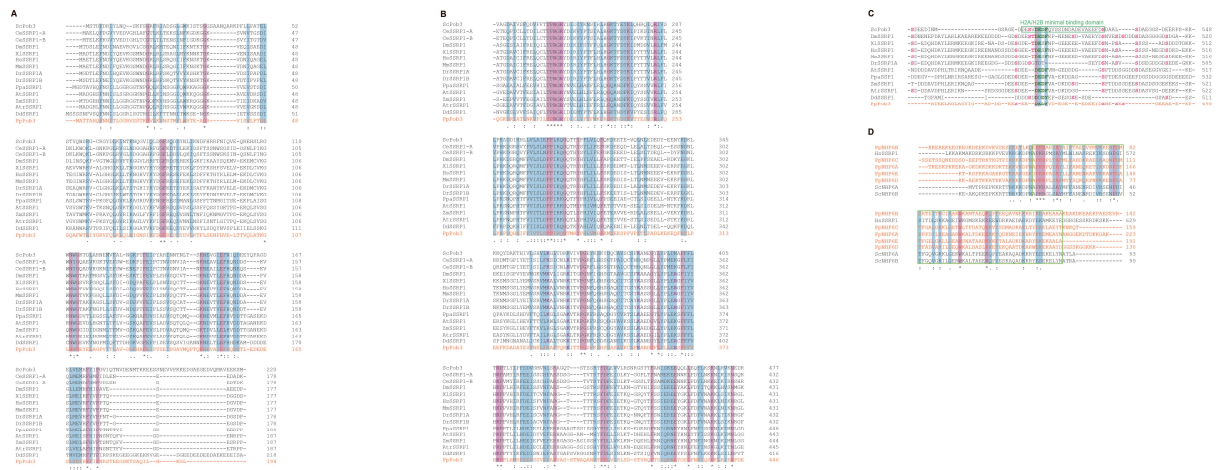

**Figure S11.** Protein alignments for the *Physarum* Pob3 and NHP6 proteins of the FACT complex. **A.** Alignment correspond to the N-terminal and dimerization regions for the Pob3/SSRP1 proteins. **B.** Alignment correspond to the middle region for the Pob3/SSRP1 proteins. Residues R211/R213/R241/K319/K325/K346/R357/K364-HsSPT16 involved in DNA binding [119] are well conserved and depicted in purple. **C.** Alignment correspond to the IDD region for the Pob3/SSRP1 proteins. The H2A/H2B minimal binding domain defined in ScPob3 IDD region [39] is represented by a green square. It is poorly conserved across species. Key residues of the H2B-binding motif (D/E)xxQ (where Q is F or Y, and x is any residue) [39] are depicted in green and those for nucleosomal DNA binding in pink. The H2B-binding motif is strongly conserved in SPT16 proteins, especially in PpSPT16 and in DdSSRP1 [37]. Serine phosphorylation in DmSSRP1 C-terminal region inhibits nucleosomal DNA binding. These residues are depicted in pink and conserved but to a smaller extent in PpPob3. **D.** Alignment correspond to the HMG region for the Pob3/SSRP1 proteins. The HMG box is depicted by a light green box. The yeast and *Physarum* Pob3 proteins lack the HMG box present in HsSSRP1. The HMG box is located in the NHP6 proteins of yeast and *Physarum*. Alignment is performed with NHP6 proteins reported in Table S2. Alignments are performed with Pob3/SSRP1 proteins used in the phylogenetic tree reported in Figure S2N. TtSSRP1 was removed from the alignment for an easier reading in Figure S11A-C. The alignment in c was performed according to [140]. The *Physarum* proteins appear in red. Positions refer to the mature protein with the initial methionine. Asterisk indicates a fully conserved residue labelled with a pale pink rectangle. Colon and dot indicate conservation between residues of, respectively, strongly and weak similar properties and are labelled with a pale blue rectangle. Atr: *Amborella trichopoda*; At: *Arabidopsis thaliana*; Ce: *Caenorhabditis elegans*; Dd: *Dictyostellium discoideum*; Dr: *Danio rerio*; Dm: *Drosophila melanogaster*; Hs: *Homo sapiens*; Mm: *Mus musculus*; Pp: *Physarum polycephalum*; Ppa: *Physcomitrella patens*, Sc: *Saccharomyces cerevisiae*; Tt: *Tetrahymena thermophila*; Zm: *Zea mays*.

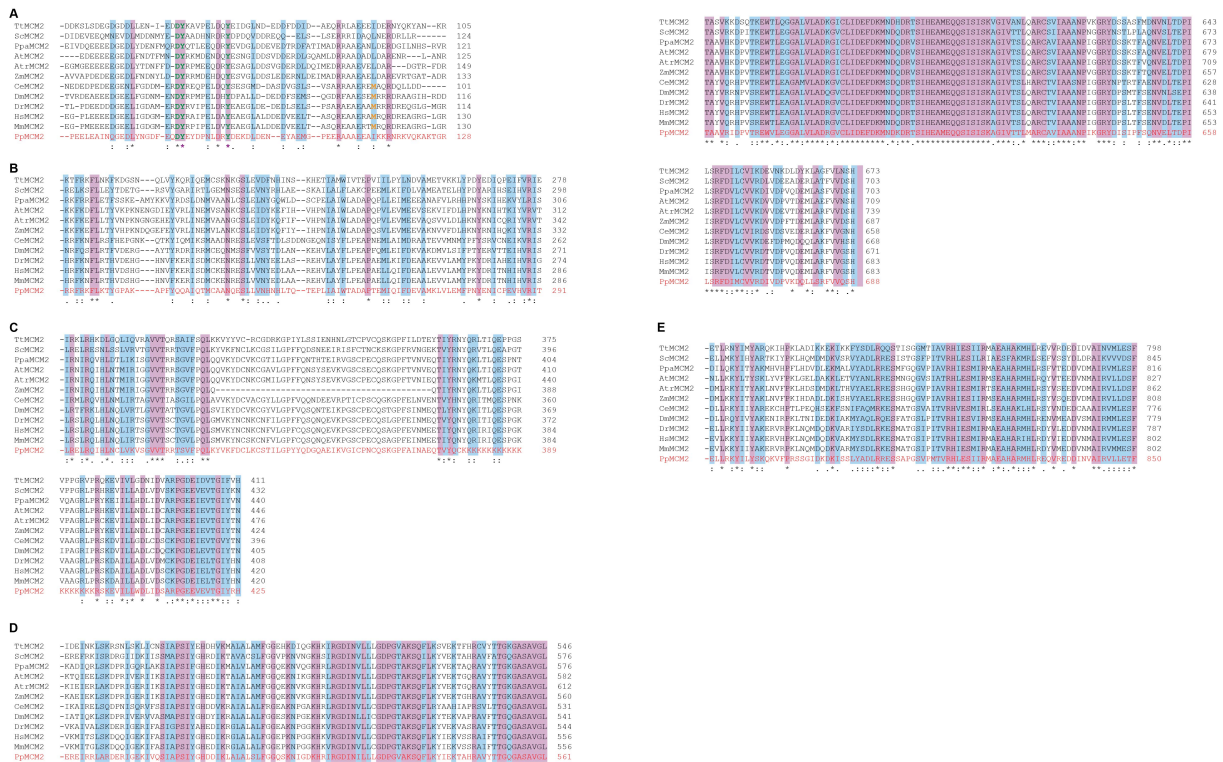

**Figure S12.** Protein alignments for the *Physarum* MCM2 protein. Alignments correspond to the HBD (A), MCM N-terminal (B), OB-fold (C), MCM (D) and AAA-lid (E) domains for the MCM2 proteins. The D80/Y81/Y90-HsMCM2 residues are involved in H3/H4 binding; they are conserved in all analyzed species including *Physarum* and are displayed in green (A). The Y81/Y90-HsMCM2 residues are also involved in the MCM2 association with the histones-FACt complex [12]. Both are conserved in all analyzed species which is represented by a purple asterisk (A). Alignments are performed with MCM2 proteins used in the phylogenetic tree reported in Figure S2O. The *Physarum* protein appears in red. Positions refer to the mature protein with the initial methionine. Asterisk indicates a fully conserved residue labelled with a pale pink rectangle. Colon and dot indicate conservation between residues of, respectively, strongly and weak similar properties and are labelled with a pale blue rectangle. Atr: *Amborella trichopoda*; At: *Arabidopsis thaliana*; Ce: *Caenorhabditis elegans*; Dd: *Dictyostellium discoideum*; Dr: *Danio rerio*; Dm: *Drosophila melanogaster*; Hs: *Homo sapiens*; Mm: *Mus musculus*; Pp: *Physarum polycephalum*; Ppa: *Physcomitrella patens*; Sc: *Saccharomyces cerevisiae*; Tt: *Tetrahymena thermophila*; Zm: *Zea mays*.

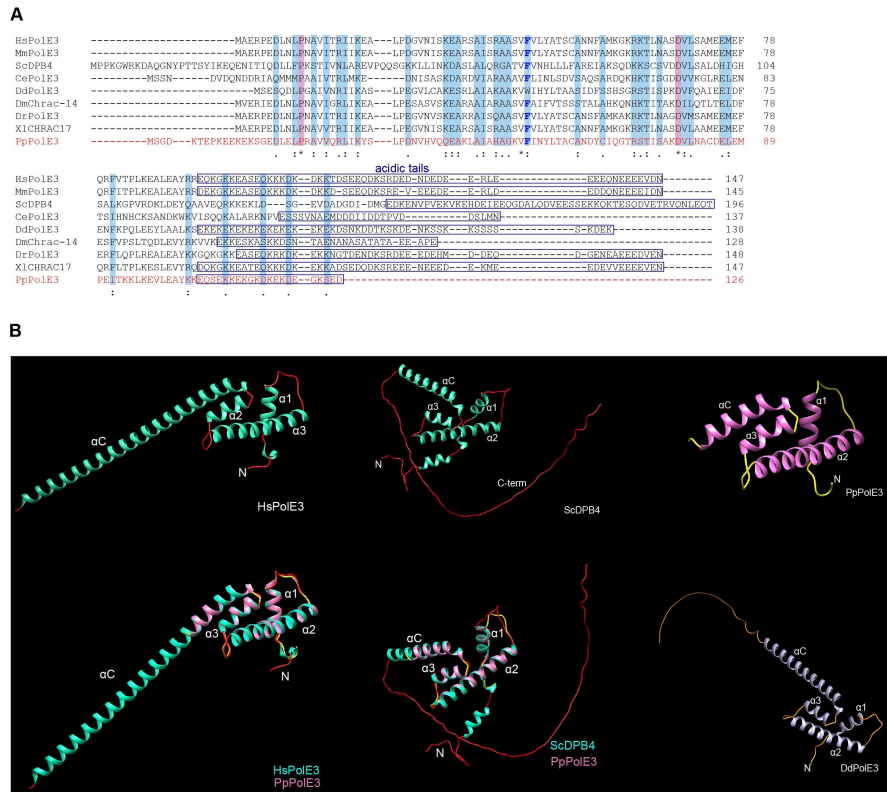

**Figure S13.** Analysis of the PolE3 chaperone. **A.** Alignment correspond to the PolE3 proteins. The C-terminal region of PolE3 is required for interaction with H3/H4 and the F44 residue involved in the interaction between HsPolE3 and HsPolE4, HsPolE1, HsPolE2 [122] is conserved in PpPolE3 and displayed in blue. Acidic tails are indicated by blue rectangles. Alignment is performed with PolE3 proteins used in the phylogenetic tree reported in Figure S2P. The *Physarum* proteins appear in red. Positions refer to the mature protein with the initial methionine. Asterisk indicates a fully conserved residue labelled with a pale pink rectangle. Colon and dot indicate conservation between residues of, respectively, strongly and weak similar properties and are labelled with a pale blue rectangle. Atr: *Amborella trichopoda*; At: *Arabidopsis thaliana*; Ce: *Caenorhabditis elegans*; Dd: *Dictyostellium discoideum*; Dr: *Danio rerio*; Dm: *Drosophila melanogaster*; Hs: *Homo sapiens*; Mm: *Mus musculus*; Pp: *Physarum polycephalum*; Ppa: *Physcomitrella patens*, Sc: *Saccharomyces cerevisiae*; Tt: *Tetrahymena thermophila*; Zm: *Zea mays*. **B.** Ribbon representation of HsPolE3, ScDPB4, PpPolE3 and DdPolE3 proteins. The  $\alpha$ C helix characteristic of H2B family is much shorter in PpPolE3 than in HsPolE3 and that HsPolE3 presents a long  $\alpha$ C helix while ScDPB4 presents a long C-terminal tail. Representation of each chaperone is displayed on the upper panel, excepted for DdPolE3 presented in the right lower panel. Superimpositions of HsPolE3 and ScDPB4 with PpPolE3 are presented in the lower panel. The various helices ( $\alpha$ 1,  $\alpha$ 2,  $\alpha$ 3,  $\alpha$ C) and the N-terminal tail (N) are indicated. Models were generated with Phyre2 for PpPolE3 and AlphaFold for HsPolE3, ScDPB4 and DdPolE3. Superimpositions were done with the Chimera software.



**A**

|               |                                                                                                      |      |
|---------------|------------------------------------------------------------------------------------------------------|------|
| PpaSPT6       | -YSVGS-YGYSA-----GSRPSESAS-----                                                                      | 1483 |
| AtrSPT6       | -GSSSGDG <b>GW</b> RGRSSFDRLRS--TPGSRTGRHGNNARDGHPGVPRPYG---QG-RGRGRNDEGN                            | 1529 |
| AtsPT6L       | -HSSSGGS <b>GW</b> SSSQSE <b>GW</b> KGNSDRSGSGRGGEYRNGGGRDGHPSGAPRPYGGRRGR-RGRGRDDMNS                | 1502 |
| ZmSPT6        | - <b>W</b> SGG-----GGDANG <b>GW</b> RGDSNDR-----DRPFSGRSGGRFDSRNSSGGRGRG-RGRGRGN---                  | 1509 |
| PpSPT6        | -MST-----PQINATPAHPGAATPAHPGNATPAHPGNATPAHQSG <b>GW</b> ANAAQGGNNFPGM                                | 1518 |
| .             |                                                                                                      |      |
| PpaSPT6       | GFDSRNSQ <b>W</b> GDSR--AGG <b>GW</b> GSS-----S <b>GW</b> SR--GNS <b>GW</b> DKAV-----VR              | 1522 |
| AtrSPT6       | DSGYGSSK <b>W</b> SGAN-DSGG <b>GW</b> SGSKDSGG <b>GW</b> SGSKDTGG <b>GW</b> SGSKDTGGG <b>W</b> SGSKE | 1588 |
| AtsPT6L       | DRQDNGND <b>W</b> GNNDTGTAD <b>GW</b> GN-----GGG <b>GW</b> SES-----                                  | 1535 |
| ZmSPT6        | -----FGDD--DNAG <b>GW</b> SGG-----GGG--                                                              | 1527 |
| PpSPT6        | QAM--QQNLPATSSLSL <b>W</b> GWDSGTST---PGHSQGGAG <b>W</b> NNNNNTNNGNNNAFAN                            | 1572 |
| ***. . *      |                                                                                                      |      |
| PpaSPT6       | PSG-----DN-----RGTSN <b>W</b> GPEPSPRNNW                                                             | 1544 |
| AtrSPT6       | SGGG <b>W</b> SGLSGHKSSESFSRDDLQAGG <b>W</b> SGSAG-----GGRNSD <b>W</b> GGGGGGGG                      | 1638 |
| AtsPT6L       | -----AGKK-----TG-----GGSTG <b>W</b> SGSESNGKS-                                                       | 1557 |
| ZmSPT6        | -----NSGRWTDNIGT-GG-                                                                                 | 1540 |
| PpSPT6        | -----P---TNDVT <b>W</b> GWEDNNNNNNNNNNYGNSSNSNYGQNDYGNRR                                             | 1612 |
| . . . .       |                                                                                                      |      |
| PpaSPT6       | DKNGGAGRSAWDNSQPGAPSQWDNVT-----                                                                      | 1570 |
| AtrSPT6       | -SGGKSSSDWVGSGSGRNSE <b>W</b> SGESGQNSDVGVDAGSGRNND <b>W</b> GGGGSGSGRN-ND <b>W</b>                  | 1696 |
| AtsPT6L       | -DG-----AGS <b>W</b> SGS-----                                                                        | 1567 |
| ZmSPT6        | -SG-----GSS <b>W</b> GGGGD-----                                                                      | 1553 |
| PpSPT6        | DDR-----SRDN-----NSNNYGNRD---NYGNRGNSYRDNNNNYNSNRDSSRY                                               | 1655 |
| .             |                                                                                                      |      |
| PpaSPT6       | -----NSEGGAAGD <b>W</b> AAVPGATPT-----SGS <b>W</b> DAVP--                                            | 1599 |
| AtrSPT6       | GGGGSVAGGKGPNSD <b>W</b> GGGGGGGGSGGGGKGPNSD <b>W</b> GGGGGGGGGKGPNS <b>W</b> GGGGG-                 | 1755 |
| AtsPT6L       | -----GGGGSG <b>W</b> GNDSGGKKSSD---GGFGSGSGGGSD <b>W</b> GNES--                                      | 1605 |
| ZmSPT6        | -----DSNRGGGGG <b>W</b> GSAGGGAD-----NAGGNG <b>W</b> AGAAA--                                         | 1585 |
| PpSPT6        | GGGYGGGGG-DN-YRSGGGGGGGGGG-----GGYGDRNR                                                              | 1692 |
| * . . . * . * |                                                                                                      |      |
| PpaSPT6       | ---GAT---P-----TSGS <b>W</b> MPGGHAGPRGF---                                                          | 1620 |
| AtrSPT6       | -GSGGGE---KGPDGD <b>W</b> G--GGSGGGGKGPDGD <b>W</b> GGDS <b>W</b> NSGKKGGSSGAWPES                    | 1807 |
| AtsPT6L       | ---GGKK---SSADGG----- <b>W</b> GS-----ESG                                                            | 1621 |
| ZmSPT6        | ---GGSD---DPGLGS-----A-----KKV                                                                       | 1599 |
| PpSPT6        | DSRGGRDNNNNRRDRDYNNRSGGGGGGGGGGDRNRD-----SRD                                                         | 1733 |
| *             |                                                                                                      |      |
| PpaSPT6       | -----                                                                                                | 1620 |
| AtrSPT6       | GGGNSGGG <b>W</b> GNASTTTSATNVGGG <b>W</b> A-----                                                    | 1834 |
| AtsPT6L       | GKSDGEG <b>W</b> GNPESSRKSDGGGG <b>W</b> -----                                                       | 1647 |
| ZmSPT6        | VPAQDGGT <b>W</b> GS-----EGGG <b>W</b> -----                                                         | 1617 |
| PpSPT6        | NRGRDGG <b>W</b> DDRDKGSGGGGGGGGRRSGGEGFEISAQQVFHGLLSFPLVPFWKSL                                      | 1791 |

**B**

|         |                                                                                                                     |     |
|---------|---------------------------------------------------------------------------------------------------------------------|-----|
| ScSPT6  | -SDKIDEMYDIFGDG-HDYDWALEIEN---EELN---GNDNN-EAEEEEIDEET--GA-----IKSTKKKISLQDIYDLEDLKKNLMTEG                          | 314 |
| CeSPT6  | -EGAEDDARDVFGVEDFNLDE-----FYDDDDGEDGLEDEEEEIIEDDGEGGEIKIRKKDTTK---KSTLLESIEPSEIDRGFLLPG                             | 292 |
| DmSPT6  | -DASLQEGQDIFGV-DFDYDD-----FSKYEEDDYEDDS-EGDEYDEDLGVGDDTRVKKKKKALKKKVVKKTIFDIYEPSELKRGHFTDM                          | 263 |
| DrSPT6  | -DAALQEAQEIFGG-DFDFAE-----FDTEAYDHAEE-----EE-EEDQDDESWDPRPKQTKRRVSRRSIFEIYEPSELESSHMTDQ                             | 280 |
| XLSP6   | -DAALQEAQEIFGV-DFDYDE-----FEKYDEDEDEM-E-EYD-YE-DDEGDAETVRPKKTAKKRVSRRSIFEMYEPSELESSHLTDQ                            | 283 |
| HsSPT6  | -DAALQEAQEIFGV-DFDYDE-----FEKYNEYDEELEEE-EYE-YE-DDEAGEIRVRPKKTTKKRVSRRSIFEMYEPSELESSHLTDQ                           | 273 |
| MmSPT6  | -DAALQEAQEIFGV-DFDYDE-----FEKYNEYDEELEEE-DYE-YE-DDETEGEIRVRPKKTTKKRVSRRSIFEMYEPSELESSHLTDQ                          | 281 |
| PpaSPT6 | -SIALQEAQEIFGDVTSLEERRRRERDTLAGVDDEDRVDD-----DD---DDGYGR-----SRKPPSQKLEKQFEPSSLLEKFLTER                             | 364 |
| AtrSPT6 | -SSALQEAHEIFGDVDELLRFRKLGHGKAGDGFDDVD-----DS-----VDGPKRLEDEFEPSEILEEKYMTKE                                          | 286 |
| AtsPT6L | -ITAMRDANEIFGDVDELLTIRKKGLA-----S-----NQRMERRLEDEFEPSEILEEKYMTGN                                                    | 286 |
| ZmSPT6  | -SSALQEAQDIFGDVDELLALRKQELEREL-----NS-----GELRGARLEDEFEPSEILEEKYMTSK                                                | 338 |
| PpSPT6  | -RGALQDAEDT <b>EG</b> SVDFFKQASGRSRPRGDEFDDGDYDGTQGLSELDLDAEIEEGD-----EKQKDLPLAD <b>Y</b> EHYEPSSL <b>EQ</b> KHFTSE | 275 |
| : : **  |                                                                                                                     |     |

**Figure S14.** Protein alignments for the *Physarum* SPT6 protein. **A.** Alignment correspond to the WG/GW domain for the SPT6 proteins. The WG/GW domain was described as a plant-specific WG/GW domain required for Argonaute interaction and small RNA-mediated gene silencing; this domain is surprisingly also present in PpSPT6 (f, WG/GW in purple). **B.** Alignment correspond to the H3-binding region for the SPT6 proteins. The H3-binding region corresponds to the region 239-314AA of ScSPT6 [44] which is located between the acidic N-terminal domain responsible for Iws1 (Interact-With-SPT6) binding and the HtH domain. The F249-ScSPT6 residue involved in nucleosome binding is depicted in green (B). Alignments are performed with SPT6 proteins used in the phylogenetic tree

reported in Figure 2B. The *Physarum* proteins appears in red. Positions refer to the mature protein with the initial methionine. Asterisk indicates a fully conserved residue labelled with a pale pink rectangle. Colon and dot indicate conservation between residues of, respectively, strongly and weak similar properties and are labelled with a pale blue rectangle. Atr: *Amborella trichopoda*; At: *Arabidopsis thaliana*; Ce: *Caenorhabditis elegans*; Dd: *Dictyostellium discoideum*; Dr: *Danio rerio*; Dm: *Drosophila melanogaster*; Hs: *Homo sapiens*; Mm: *Mus musculus*; Pp: *Physarum polycephalum*; Ppa: *Physcomitrella patens*, Sc: *Saccharomyces cerevisiae*; Tt: *Tetrahymena thermophila*; Zm: *Zea mays*.

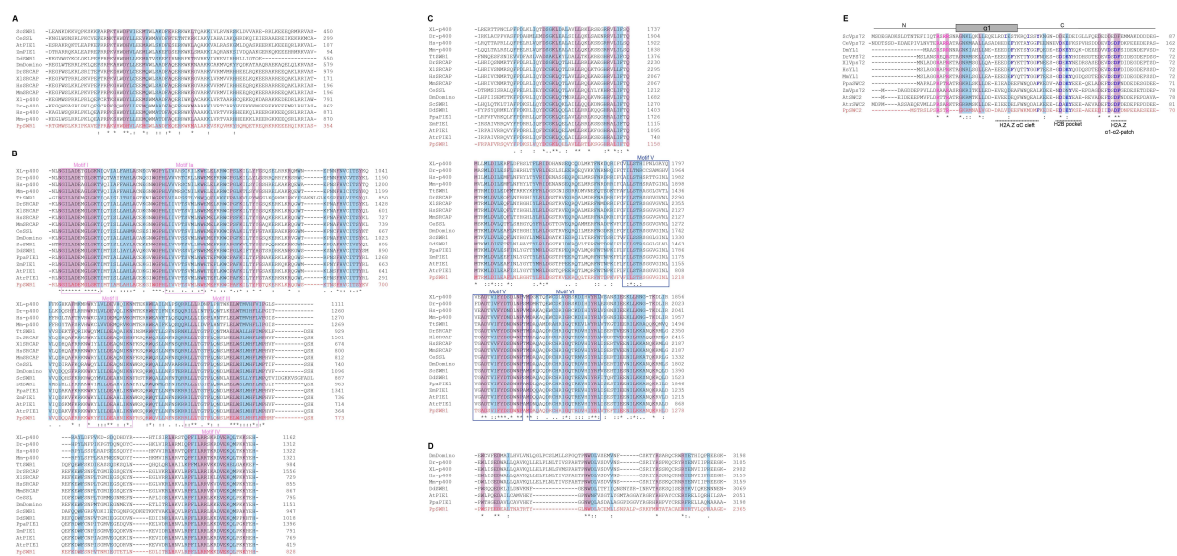

**Figure S15.** Protein alignments for the *Physarum* SWR-C complex. **A to D.** Alignments correspond to the HSA (**A**), SNF2 (**B**), Helicase (**C**) and SANT (**D**) domains for the SWR1 proteins. No HSA domain was found neither in AtrSWR1 nor in TtSWR1 with Interproscan. Five of the seven motifs (I and Ia to IV) that constitute the ATPase domain are located in the SNF2 region (**B**) and two (V and VI) in the Helicase domain (**C**). Alignments are performed with SWR1 proteins used in the phylogenetic tree reported in Figure S2Q. **E.** The helix  $\alpha 1$  present in the Z domain is indicated as well as the N-terminal (N) and C-terminal regions. Dashed lines indicate regions which interact with the H2A.Z–H2B dimer (namely H2A.Z  $\alpha$ C cleft, H2B pocket and H2A.Z  $\alpha 1$ – $\alpha 2$ -patch). The Z domains (Figure 6C) responsible for H2A.Z binding and selectivity as well as DmYL1 key residues [47] are widely conserved (**E**, in blue). The RxxR motif (x for any residue) anchors ScSWC2 to the nucleosome surface [48] and its arginines are displayed in pink. Alignments are performed with SWC2 proteins used in the phylogenetic tree reported in Figure S2R, TtYL1 and DdYL1 were removed from alignment due to lower conservation. The *Physarum* proteins appear in red. Positions refer to the mature protein with the initial methionine. Asterisk indicates a fully conserved residue labelled with a pale pink rectangle. Colon and dot indicate conservation between residues of, respectively, strongly and weak similar properties and are labelled with a pale blue rectangle. Atr: *Amborella trichopoda*; At: *Arabidopsis thaliana*; Ce: *Caenorhabditis elegans*; Dd: *Dictyostellium discoideum*; Dr: *Danio rerio*; Dm: *Drosophila melanogaster*; Hs: *Homo sapiens*; Mm: *Mus musculus*; Pp: *Physarum polycephalum*; Ppa: *Physcomitrella patens*, Sc: *Saccharomyces cerevisiae*; Tt: *Tetrahymena thermophila*; Zm: *Zea mays*.

**A**

```

TtAPLF -LKEHILGRRGDLKVD---NPKVSGQHCVLKYDYAQKKAYIIDVSSNGTS-----LFNKKLEKNKEVELENGDLVNLQDKS----- 100
DrAPLF -NSECTVGRKKDCDLSPANKLVSGNHCKITHDQNSGKQVWLEDMSNGTV-----INMSKVVKQTHLLQNGDVIYFYVRKNEPEQNIAYVYQ- 114
XlAPLF -KKEWTIGRKKACDLSPGKLVSGEHCKITVNEESGEVSLDSTNGTV-----INKLKVIRKQTYPLKNGDVIYVYVRKNEPEQ----- 110
HsAPLF -PGETVIGRGLLGIT---DKRVSRRAHILEVAGGQLRIKP--IHTNPCFYQSSEKSQLPLKPNLWCYLNPGDSFSLVDKYI-----FRIL- 101
MmAPLF -PGQTVIGRGLLGIT---DKRVSRRAHILEVVDSQLRIKP--IHRNPCFYQSSEKSQLHPMETQVWSQLHPGDSFSLLLDKYA-----FRVF- 98
PpAPLF -GGPTELGRGL---VN---NKKLSRKQCVVETVDDGVELTP--LGVNPMTMSRAGEDVEILSRNEKYTLHEGDSFTLCGEQYR-----FVLQ- 133
      : **      :      :      : * . . . :      .      *      :      :      * . ** . . :

```

**B**

```

                                HBD
                                cap-anchor  NAP1L1 motif  KR-motif
HsAPLF -DEDN---DNVGQPN---YDLND--SF--LDDEEDYEPT-DESDSWEPK---EDEEKDVEELLK-EAKRFMKRK- 512
MmAPLF -DEDD---DDVGQPSD-----DEDEEDYEPT-DESDSWHPGK---DDEEQEDVDELLK-EAKSSLHLKH- 491
XlXRCC1 -DEDTEDENTRIVPSKANH-----KPKQEDYDASTDEE---ATGERQQHEDDSGEDTEDEL-RFQEEKQGKK- 521
DrXRCC1 -DESEETPKAKTPEKKPVTPKKQPVVEEEEEEEYGGSTDEE---GPG---DDGSGMDTEDELN-RVEMASRKKK- 490
PpXRCC1 --SDDEKTNDKEPTKMYKK-DSVVSSALDTETLMGPTODN-VYFSTS---EDDTHIDKQGTIRKDFQINPKPK- 530
      . .      *      . : : : * :      . : * : : : : *
                                cap-anchor  NAP1L1 motif  KR-motif
                                HBD

```

**Figure S16.** Analysis of the APLF chaperone. **A.** Alignment correspond to the FHA domain for the APLF proteins. In response to DNA damage, APLF proteins can be phosphorylated. The putative phosphate-binding residues are displayed in light blue. Basic residues supposed to confer specificity for binding CK2-phosphorylated motifs are underlined, CK2 being a serine/threonine protein kinase. The HsAPLF S116 which is phosphorylated in response to DNA damage [141] is conserved in PpAPLF and depicted in blue and underlined. **B.** Alignment correspond to the acidic domain for the APLF proteins. The acidic tail of HsAPLF is integrated in XRCC1 for *Xenopus*, zebrafish and *Physarum*. The acidic domains present the NAP1L motif [49] of the NAP family (red rectangle). They also harbor the H2A-H2B binding cap-anchor motif of HsAnp32E, ScSPT16 and DmYL1 chaperones (purple rectangle) as well as the KR-motif (KR, lysine/arginine, blue rectangle) [50]. The NAP1L motif and the cap-anchor motif constitute the HBD domain of AFLF (orange line). Residues Y462/F468/Y476/E477/W485-HsAPLF are involved in histone binding [49,50,142]. They are depicted in green and are not conserved in most analyzed acidic domains. Alignments are performed with APLF proteins used in the phylogenetic tree reported in Figure S2S. HBD, histone binding domain; KR, lysine/arginine. The *Physarum* proteins appear in red. Positions refer to the mature protein with the initial methionine. Asterisk indicates a fully conserved residue labelled with a pale pink rectangle. Colon and dot indicate conservation between residues of, respectively, strongly and weak similar properties and are labelled with a pale blue rectangle. Atr: *Amborella trichopoda*; At: *Arabidopsis thaliana*; Ce: *Caenorhabditis elegans*; Dd: *Dictyostellium discoideum*; Dr: *Danio rerio*; Dm: *Drosophila melanogaster*; Hs: *Homo sapiens*; Mm: *Mus musculus*; Pp: *Physarum polycephalum*; Ppa: *Physcomitrella patens*, Sc: *Saccharomyces cerevisiae*; Tt: *Tetrahymena thermophila*; Zm: *Zea mays*.



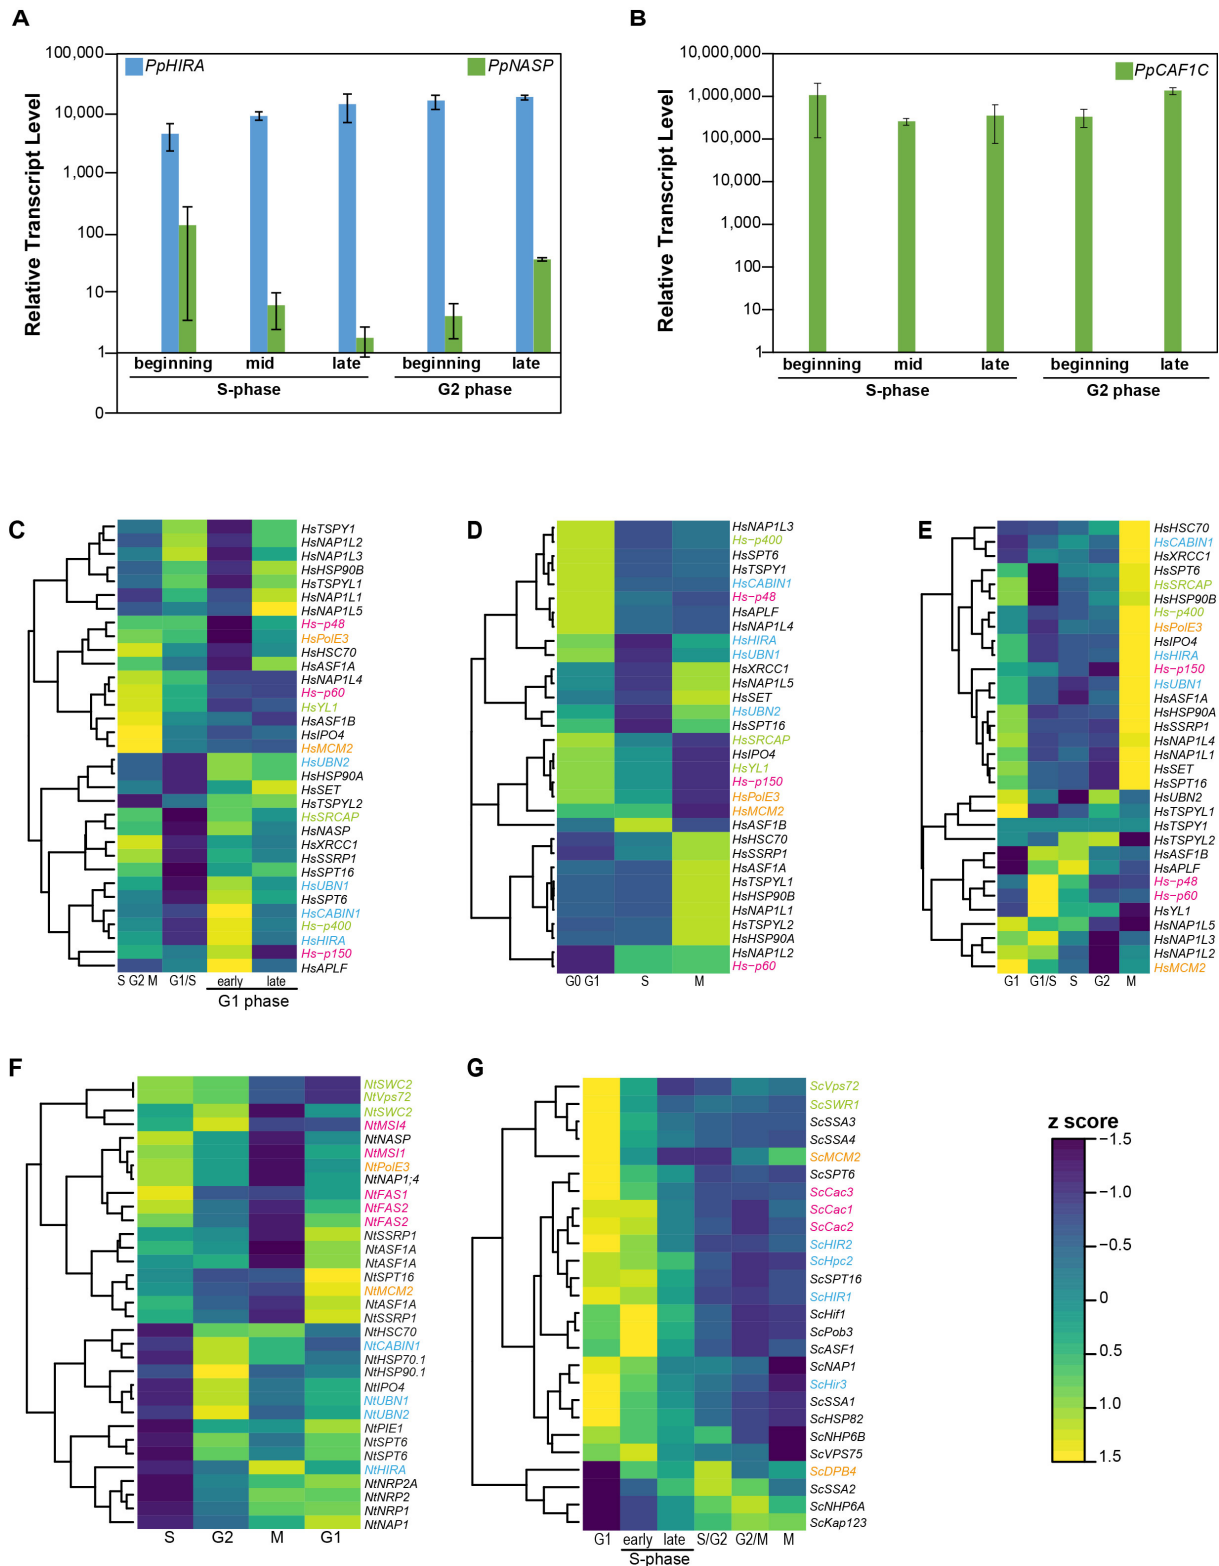

**Figure S17.** Expression analysis histone chaperone-coding genes. **A-B.** Mean relative transcript level for *Physarum PpHIRA*, *PpNASP* (**A**) and *PpCAF1C* (**B**) genes measured by qRT-PCR. Means are displayed with a logarithmic scale and obtained from three biological replicates consisting of independent mitotically synchronous plasmodia cultures harvested at different times of the cell cycle. Samples used for RNA-Seq and qRT-PCR are independent. **C-G.** Heat maps displaying the RNA-Seq expression of histone chaperones at various stages of the cell cycle in human (HUVEC, **C**; MCF-7, **D**;

U2OS, E), tobacco TN-90 (F) and yeast (G) cells. Cell cycle stages are indicated at the bottom of the map. Each row corresponds to a transcript listed on the right and each column to a cell cycle time point. The color bar at the bottom right depicts the scale for z-score, with blue representing lowest expression and yellow representing the highest. The CAF-1 complex is associated with H3.1/H4 incorporation during DNA replication and its subunits are displayed in pink. The HIR complex is associated with H3 variant incorporation throughout the cell cycle and its subunits are displayed in blue. The SWR-C complex is involved in H2A.Z/H2B replacement and its subunits are displayed in green. MCM2 and PolE3 are histone chaperones associated with replication and are displayed in orange.

**Table S1: List of histone chaperones identified in *Physarum polycephalum*.**

| Physarum Histone chaperone | Physarum Transcript ID               | Scaffold                                    | Number of exons/introns | Predicted Protein Molecular Weight (KDa) | Human homologue(s)                                               | % of Disordered residues (RAPID) |
|----------------------------|--------------------------------------|---------------------------------------------|-------------------------|------------------------------------------|------------------------------------------------------------------|----------------------------------|
| PpASF1                     | Phypoly_transcript_17984             | Scaffold927                                 | 4/4                     | 22.56                                    | Anti-silencing function 1A/B (ASF1A/B)                           | 27.23%                           |
| PpMCM2                     | Phypoly_transcript_01999             | Scaffold1687                                | 20/19                   | 108.7                                    | Minichromosome maintenance protein 2 (MCM2)                      | 25.29%                           |
| PpHSP90                    | Phypoly_transcript_03991             | Scaffold842 & Scaffold258                   | 6/5                     | 80.31                                    | Heat shock protein 90A/B (HSP90A and HSP90B)                     | 21.09%                           |
| PpHSC70                    | Phypoly_transcript_04582             | Scaffold831                                 | 15/14                   | 91.91                                    | Heat shock cognate 70 (HSC70: HSPA8)                             | 10.99%                           |
| PpIPO4                     | Phypoly_transcript_01375             | Scaffold213                                 | 7/6                     | 117.65                                   | Importin 4 (IPO4)                                                | 11.3%                            |
| PpSPT6                     | Phypoly_transcript_00177             | Scaffold740 & Scaffold436                   | 30/32                   | 202.76                                   | Suppressor of Ty 6 (SPT6)                                        | 33.22%                           |
| PpAPLF                     | Phypoly_transcript_03499             | Scaffold4622 & Scaffold945                  | 2/9                     | 48.09                                    | APLF aprataxin and PNK-like factor                               | 78.67%                           |
| PpPOLE3                    | Phypoly_transcript_27931             | Scaffold54                                  | 4/3                     | 14.22                                    | PolE3                                                            | 58.73%                           |
| PpSWR1                     | Phypoly_transcript_00085             | Scaffold2256                                | 11/10                   | 261.27                                   | SRCAP, E1A-binding protein p400 (hDomino)                        | 36.0%                            |
| PpSWC2                     | Phypoly_transcript_09236             | Scaffold551                                 | 7/6                     | 41.56                                    | Protein YL1 (YL1), vacuolar protein sorting 72 homologue (VPS72) | 64.67%                           |
| PpSPT16                    | Phypoly_transcript_00559             | Scaffold433 & Scaffold1547                  | 23/28                   | 119.68                                   | Suppressor of Ty 16 (SPT16)                                      | 25.3%                            |
| PpSSRP1                    | Phypoly_transcript_05191             | Scaffold957 & Scaffold3182                  | 15/14                   | 59.88                                    | Structure-specific recognition protein 1 (SSRP1)                 | 28.6%                            |
| PpSET                      | Phypoly_transcript_13763             | Scaffold146                                 | 5/4                     | 28.52                                    | Patient SE translocation (SET)                                   | 45.36%                           |
| PpNAP1L1                   | Phypoly_transcript_11436             | Scaffold35                                  | 8/7                     | 42.35                                    | Nucleosome assembly protein 1-like (NAP1L1-6)                    | 51.22%                           |
| PpCAF1C                    | Phypoly_transcript_09477             | Scaffold1106                                | ONLY RBAP48             | 47.76                                    | Retinoblastoma associated protein 46 (RBAP46)                    | 18.44%                           |
| PpCAF1A                    | Phypoly_transcript_03998             | Scaffold5423 & Scaffold4498                 | 10/9                    | 83.98                                    | Chromatin assembly factor 1, subunit A (CAF1A or p150)           | 34.31%                           |
| PpCAF1B                    | Phypoly_transcript_09859             | Scaffold6006 & Scaffold8861 & Scaffold10170 | 14/13                   | 70.28                                    | Chromatin assembly factor 1, subunit B (CAF1B or p60)            | 61.05%                           |
| PpHIRA                     | Phypoly_transcript_01462             | Scaffold428                                 | 19/19                   | 110.63                                   | Histone regulation A (HIRA)                                      | 25.7%                            |
| PpUBN                      | Phypoly_transcript_03291             | Scaffold395                                 | 10/9                    | 87.31                                    | Ubinuclein 1 (UBN1) and Ubinuclein 1 (UBN2)                      | 68.04%                           |
| PpCABIN1                   | Phypoly_transcript_00351             | Scaffold5                                   | 34/35                   | 176.49                                   | Calcineurin-binding protein cabin-1 (CABIN1)                     | 23.1%                            |
| PpNASP                     | S3S101K5_5354_LULU & Contig588_N11D4 | Scaffold42                                  | 5/4                     | 47.52                                    | Nuclear autoantigenic sperm protein (NASP)                       | 45.72%                           |

**Table S2: List of protein sequences used for phylogenetic trees.** NA, no homolog identified by a blast search in this organism.

| RefSeq ID      | Tree ID  | Organism        | Chaperone | Protein Sequence                                                                                                                                                                                                                                                                                                    |
|----------------|----------|-----------------|-----------|---------------------------------------------------------------------------------------------------------------------------------------------------------------------------------------------------------------------------------------------------------------------------------------------------------------------|
| NP_176846.1    | AtASF1A  | A. thaliana     | ASF1      | MSAIKITNVAVLHNP<br>APFVSPFQFEISYECL<br>NSLKDDLEWKLIYVG<br>SAEETYDQLLESVLV<br>GPVNVGNVRFVQA<br>DPPDPKIQEEDIIGV<br>TVLLTCSYMGQEFIR<br>VGYVNNDEDEQLK<br>EEPPTKVLIDKVQRNI<br>LSDKPRVTKFPIDFHP<br>EEEQTAATAAPPEQS<br>DEQQPNVNGEAQVL<br>PDQSVEPKPEES                                                                      |
| NP_198627.1    | AtASF1B  | A. thaliana     | ASF1      | MSSINITNVTVDNP<br>APFVNPFFQFEISYECL<br>TSLKDDLEWKLIYVGS<br>AEDETYDQVLESVLV<br>GPVNVGNVRFVLA<br>DSPDPLKIREEDIIGVT<br>VLLLTCSYMDQEFIRV<br>GYVNNDYDDEQLRE<br>EPPTKVLIDKVQRNLI<br>TDKPRVTKFPIHFHPE<br>NEQTLGDGPAPTEPF<br>ADSVVNGEAPVLEEQ<br>PQKLQIEQFDDSDV<br>NGEAIALLDQPNLQ<br>ET                                      |
| XP_006843956.1 | AtrASF1A | A. trichopoda   | ASF1      | MSAVNITNVTVDNP<br>AAFLNPFQFEISYECLL<br>PLKDDLEWKLIYVGS<br>AEDETYDQLLESVLV<br>PINVGNVRFVQADP<br>PDPTKIPDEDIIGVTVL<br>LLTCSYMGQEFIRVGY<br>YVNNDYDDEQLREEP<br>PPRVLIDRVQRNIALD<br>KPRVTKFPIHFHPE<br>DSTDAPPSPSPSEN<br>PIEEPQTEPSARLDT                                                                                  |
| NP_492567.3    | CeASF1L  | C. elegans      | ASF1      | MASRVNIVQVQILDN<br>PAMFVDKFKMEITFE<br>VFEHLPHDLEWELVY<br>VSGTSRDFDQVLDL<br>ALVGPIPEGRHKVVF<br>DAEHDPDISKIPVEDIV<br>GVSVLLLRCKYNDQE<br>FINMGWVAVANEYTD<br>EELKENPPAKPLIEKLS<br>RKIETEDLRVTTFPIR<br>WTDEDPAEPPVDEE<br>ANKVFDEDDLMPH<br>DDGQDDDEEEDDD<br>ETGPNTTEVDLNEF<br>NERMANAHDGTEQ<br>KNGEESMEHDGASG<br>DVEMGDKH |
| XP_638098.1    | DdASF1   | D. discoideum   | ASF1      | MSHIRLTQVLHNNP<br>SSFNSPFIIDISFECVS<br>PIKEDLEWKVIYVGS<br>DNEKNDQVLDLILLG<br>PVAVGQNGQVFEVD<br>PPDANKIPKDLLGV<br>TVVFLICAYKGEDFIR<br>VGYVNNDYFEQELK<br>DNPPETPDLSKIQRN<br>VMDDKPVVTGFPIQ<br>WN                                                                                                                      |
| NP_001189131.1 | DmASF1   | D. melanogaster | ASF1      | MAKVHITNVVVDN<br>PSSFFNPFQFELTFECI<br>EELKEDLEWKMIYVG<br>SAESEHHDQVLDTIYV<br>GPVPEGRHIFVQAD<br>PPDVSKIPEPDAVGV<br>TIVLLTCSYRGQEFVR<br>VGYVNNDYADPEM<br>RENPTKPLFEKLRN<br>ILASKPRVTRFKINWD<br>YGHINGNGNGVENG<br>HQDEMATDGPSTSE<br>AASAVIHPEDDNL<br>MPMENGKALNENS<br>NSLAMEC                                          |

|                |          |             |      |                                                                                                                                                                                                                                                                                                          |
|----------------|----------|-------------|------|----------------------------------------------------------------------------------------------------------------------------------------------------------------------------------------------------------------------------------------------------------------------------------------------------------|
| NP_996946.1    | DrASF1A  | D. rerio    | ASF1 | MAKVQVLNVAVLDN<br>PSPFGNPFQFEITFEC<br>MEDLPEDLEWKIIYV<br>GSAESEEYDQILDVSL<br>VGVPVAGRHMVFVQ<br>ADAPNCSLIPETDAV<br>GVTVVLTCTYRGQEF<br>IRIGYVNNNEYTDTEL<br>RENPPPKPNYGQLQR<br>NILASNPRVTRFHIN<br>WEGCAEKMEDESENV<br>DPAPNAMLPPSCTP<br>GKAPLLGLVPDMSM<br>DCL                                                |
| NP_999922.1    | DrASF1B  | D. rerio    | ASF1 | MAKVQVLNVAVLDN<br>PSPFGNPFQFEITFEC<br>MEDLPEDLEWKIIYV<br>GSAESEEYDQILDVSL<br>VGVPVAGRHMVFVQ<br>ADAPNTGLIPESDAV<br>GVTVVLTCTYRGQEF<br>IRIGYVNNNEYDPEL<br>RENPPVKPDYTLQQR<br>NILASNPRVTRFHIN<br>WEATMDKMEDESEN<br>VDAPNAMLPTCM<br>PGKAPPLGLMPDMS<br>MDCL                                                   |
| NP_054753.1    | HsASF1A  | H. sapiens  | ASF1 | MAKVQVNNVVLD<br>NPSPFYNPFQFEITFE<br>CIEDLSEDLWKIIYVG<br>SAESEEYDQVLDVSLV<br>GPVPAGRHMVFVQA<br>DAPNGLIPDADAVG<br>VTVVLTCTYRGQEFI<br>RVGYVNNNEYTETEL<br>RENPPVKPDFSKLQR<br>NILASNPRVTRFHIN<br>WEDNTEKLEDAESSN<br>PNLQSLSTDALPSAS<br>KGWSTSENSLNVML<br>ESHMDCM                                              |
| NP_060624.1    | HsASF1B  | H. sapiens  | ASF1 | MAKVSVLNVAVLEN<br>PSPFHSPPRFEISFEC<br>EALADDLEWKIIYVGS<br>AESEEFQILDVSLVG<br>PVPAGRHMVFVQAD<br>APNPSLIPETDAVGT<br>VVLITCTYHGQEFIRV<br>GYVNNNEYNPELRE<br>NPPMKPDFSQLQRNI<br>LASNPRVTRFHINWD<br>NNMDRLEAIETQDPS<br>LGCGLPLNCTPIKGLG<br>LPGCIPGLLPENSMD<br>CI                                               |
| NP_079817.1    | MmASF1A  | M. musculus | ASF1 | MAKVQVNNVVLD<br>NPSPFYNPFQFEITFE<br>CIEDLSEDLWKIIYVG<br>SAESEEYDQVLDVSLV<br>GPVPAGRHMVFVQA<br>DAPNAGLIPDADAV<br>GVTVVLTCTYRGQEF<br>IRVGYVNNNEYTETEL<br>RENPPVKPDFSKLQR<br>NILASNPRVTRFHIN<br>WEDNTEKLEDAESSN<br>PNLQSLSTDALPSAS<br>KGWSTSENSLNVML<br>ESHMDCM                                             |
| NP_077146.1    | MmASF1B  | M. musculus | ASF1 | MAKVSVLNVAVLEN<br>PSPFHSPPRFEISFEC<br>EALSDDLWKIIYVGS<br>AESEEFQILDVSLVG<br>PVPAGRHMVFVQAD<br>APNPSLIPETDAVGT<br>VVLITCTYHGQEFIRV<br>GYVNNNEYPPELRE<br>NPPPKPDFSQLQRNI<br>LASNPRVTRFHINWD<br>NNPDSLEAIENQDPN<br>VDFSLSLCTPVKSLG<br>LPSCIPGLLPENSMD<br>I                                                  |
| XP_001768290.1 | PpaASF1A | P. patens   | ASF1 | MTAVNVTNVTVLDN<br>PSMFMNPFQFEISYE<br>CLCPLQDDLEWKLIYV<br>GSAEDEKYDQVLESV<br>LVGPVNIGNYRFVQ<br>ADPPELSKIPEEDTIG<br>VTVLLTCSYQGQEFI<br>RVGYVNSNDYVEAL<br>REEPPARVLIEKVQRN<br>ILADKPRVTKFPIVFN<br>SPAPVLNHIESERITD<br>SYISEPAAISTLHTYEN<br>VSDVHSTPPAAVDIM<br>QTDENIVHAASLDT<br>PMDLAPADEVRVDL<br>RTPQTLQEV |

|                |           |               |      |                                                                                                                                                                                                                                                                                                                                                         |
|----------------|-----------|---------------|------|---------------------------------------------------------------------------------------------------------------------------------------------------------------------------------------------------------------------------------------------------------------------------------------------------------------------------------------------------------|
| -              | PpASF1    | P. polyceph   | ASF1 | MGCNVNTNIQILDNP<br>APFMNPLQFEITYECI<br>TDLQEDLEWKVVVV<br>GSAESEAHQVLDLSIL<br>LGPVRVGVSNFVLQV<br>DPPDSSRIPKQDLLGV<br>TAILLMGLYKSRDFIR<br>VGYFVNNEYAEELRL<br>NPPPEGEVDLTKVVRN<br>ILAEKPRVTRFPIPWD<br>QETIIPPANTENSSSLP<br>AITTETSLDAASNHS<br>MTEEMMPMEVMST<br>ST                                                                                          |
| NP_012420.1    | ScASF1    | S. cerevisiae | ASF1 | MSIVSLLGIKVLNNPA<br>KFTDPYEFITFECLLES<br>LKHDLEWKLTYVGSS<br>RSLDHDQELDSILVGP<br>VPVGVNKFVFSADPP<br>SAELIPASELVSVTVIL<br>LSCSYDGREFVRVGYV<br>VNNEYDEELRENPP<br>AKVQVDHIVRNILAE<br>KPRVTRFNIVWDNE<br>NEGDLYPEQPGVD<br>DEEEEDDEEEDDED<br>DEDDDDQEDGEG<br>EAEAAAAEEEEEEKT<br>EDNETNLEEEEDDIEN<br>SDGDEEEGEEVGSV<br>DKNEDGNOKRRKIE<br>GGSTDIESTPKDAARS<br>TN |
| XP_001033143.3 | TtASF1    | T. thermophi  | ASF1 | MALVNIQNIQFHNN<br>PCPFLSPFKLDVTFECI<br>KPIPPDIEWQLIYIGS<br>AKDEKYDQLDKFSI<br>GSLDQGVQLQFTIETN<br>PPDHTKIPNKDDLGL<br>VTAILTVSYHNQEFF<br>RVGYVYNQYNDQE<br>LIINDPPQLIDKVERSI<br>LDKQPRITHFNIKWG<br>TEDENKETDPNTLAIL<br>QQQLAQNGTIPNQL<br>MQEMQQVNSQMQ<br>SFLDPFSKSSGILQEL<br>TTQGQTNSTNSFMF<br>GQGLDIPQNNAFQP<br>TNVFSSNPY                                 |
| NP_001086449.1 | XIASF1A-A | X. laevis     | ASF1 | MAKVQVNNVVVLD<br>NPSPFYNPFQFEITFE<br>CIEDLSEDLWKIIVVG<br>SAESEYDQVLDSVLV<br>GPVPAGRHMVFVQA<br>DAPNPGIIPDADAVG<br>VTVVLTCTYRGQEFI<br>RVGYVNNNEYTETEL<br>RENPPVKPDFSKLQR<br>NILASNPRVTRFHIN<br>WEENTEKLDDSNPH<br>MHPVLSIEARPSASK<br>GWPMSENSLNVMLE<br>SHMDCM                                                                                              |
| NP_001080310.1 | XIASF1A-B | X. laevis     | ASF1 | MAKVQILNMVVLDN<br>PCPFHNPQFEITFEC<br>IEDLPDDLEWKIIVVG<br>SAESEYDQTLDSVLV<br>GPVPAGRHMVFVQA<br>DAPNCSLIPESDAVG<br>VTVVLTCTYRGQEFI<br>RVGYVNNNEYSDPPEL<br>RENPPKHAHFGQLQR<br>NILASNPRVTRFHIN<br>WECTSEAKMEDIENV<br>DPASNTMLPPNCAP<br>SKGLAAALNTLPENS<br>MDCM                                                                                              |
| NP_001150107.2 | ZmASF1A   | Z. mays       | ASF1 | MSAVNITNVAVLN<br>PTAFLNPFQFEISYECL<br>VPLDDDLWKLIYVG<br>SAEDENYDQQLSVL<br>VGPVNVGTYRFVLQA<br>DPPDPSKIREEDIIGVT<br>VLLTCSYMGQEFMR<br>VGYVNNNDYDDEQL<br>REEPPAKVLIDRVQR<br>NILADKPRVTKFPINF<br>HPEPSTGPGQQQE<br>PQTTSPEHTGNGEA<br>NGSKPEADQ                                                                                                               |

|                |         |               |      |                                                                                                                                                                                                                                                                                                                                                                                                                                                                                                                                          |
|----------------|---------|---------------|------|------------------------------------------------------------------------------------------------------------------------------------------------------------------------------------------------------------------------------------------------------------------------------------------------------------------------------------------------------------------------------------------------------------------------------------------------------------------------------------------------------------------------------------------|
| XP_008656015.1 | ZmASF1B | Z. mays       | ASF1 | MSAVNITNVAVLN<br>PTAFINPFQFEISYEC<br>VPLDDLEWKLIYVG<br>SAEDENYDQQLSVL<br>VGPVNVGTYRFVLQA<br>DPPDPISKIREEDIIGVT<br>VLLTCSYMGQEFMR<br>VGYYVNNDYGDQEL<br>REEPPAKVLIDRVQR<br>NILADKPRVTKFPINF<br>HPEPSTGTGRQQQQ<br>QEPQTASPEKHAGSG<br>EGNGSKPEAD                                                                                                                                                                                                                                                                                             |
| NP_175112.2    | AtMCM2  | A. thaliana   | MCM2 | SPSSAGFNTDQLPIST<br>SQNSENFSDEEEAAV<br>DTQVIRDEPDEAEDE<br>EEEEGEDLFNDTFMN<br>DYRKMDENDQYESN<br>GIDDSVDDERDLGOA<br>MLDRAAADADLDAR<br>ENRLANRKLPHLLHD<br>NDSDDWNYRPSKRS<br>RTTVPFRNGGDPD<br>GNPPSPGVSQPDIS<br>MTDQTDYQDEDD<br>NDDEAEFEMYRIQGT<br>LREWVMRDEVRRFIA<br>KKFKDFLLTYVKPNE<br>NGDIEYVRLINEMVS<br>ANKCSLEIDYKEFIHV<br>HPNIAIWLADAPQPV<br>LEVMEEVSEKVIDLH<br>PNYKNIHTKIYVRTN<br>LPVNDQIRNIRQIHLN<br>TMIRIGGVVTRRSV<br>FPQLQKVKYDCNKC<br>GAVLGPFQNSYSEV<br>KVGSCSECQSKGPFT<br>VNVEQTIYRNYQKLT<br>QESPGTVPAGRLPRH<br>KEVILLNDLIDCARPG |
| XP_020523093.1 | AtrMCM2 | A. trichopoda | MCM2 | GARSPNPSGNGNPR<br>SMDSDDPSTPASPTS<br>AGFSTDRLPNTSRTS<br>QSLSDAAVDPAIIRD<br>EEEEGMGEEEEEGE<br>DLYTDNFFDDYRPM<br>EQDRYESAGLDDSVG<br>DERDLQIMEDRRA<br>AEVELDARDGTRFDR<br>KLPRLLHDQDTDDI<br>DYRPKRSRVYRPR<br>GGMSYEDVDGATPIS<br>PGGGGSHGGYHGGE<br>PPTTDQTEDEDEDD<br>AEYGIYRVQGTLEW<br>VTRDEVRRVIKKFKE<br>FLLTYVNPKNNGEH<br>EYVRLINEMVAANGC<br>SLEIDYKQFIFVHPNIA<br>IWLADAPQVLEVM<br>EEVAQSVVLDLHKNY<br>KNICQRIYVRTNLPI<br>YDQIRNIRQIHLNTMI<br>RIGGVVTRRSVFPQ<br>LQQVKYDCNCKGMIL<br>GPPFQNSYSEVKVGS<br>CPECQSKGPTVNIE<br>QTIYRNYQKMTLQES      |
| NP_001022416.1 | CeMCM2  | C. elegans    | MCM2 | QPLPIADDDDDVD<br>GIDEMFNNEDEPE<br>DEEENLFGDDMER<br>DYREQPELDQYSESG<br>MDDASDVGLSVSA<br>RRAAEREMAQRDQL<br>LDDALMYEDGDSEE<br>VDTRRRGRGRGRG<br>DAADDDSVPMEEEDI<br>PVDILENIRGRTIRDH<br>VSDEAVAKEIERFKN<br>FLRSFHEPGNKQTKYI<br>QMIKSMAADNRESL<br>EVSFTDLSDDNGEQN<br>ISYFLPEAPNEMLAIM<br>DRAATEVVMNMYPF<br>YSRVCNEIKVRISQLP<br>VEEDIRMLRQVHLN<br>MLURTAGVVTIASGIL<br>PQLAVVKYDCVACGY<br>LLGPFVQQNDEEVRP<br>TICPSCQKGPPFELNV<br>ENTVYHNYQRITMQ<br>ESPNKVAAGRLPRSK<br>DVILLGDLCDSCKPGD<br>EIEVTGVYTNNFDGSL<br>NYKQGFVFNLIHA<br>NHITNKDKMASDQL    |

|             |        |                 |      |                                                                                                                                                                                                                                                                                                                                                                                                                                                                                                                                                     |
|-------------|--------|-----------------|------|-----------------------------------------------------------------------------------------------------------------------------------------------------------------------------------------------------------------------------------------------------------------------------------------------------------------------------------------------------------------------------------------------------------------------------------------------------------------------------------------------------------------------------------------------------|
|             |        |                 |      | NNNNNNNNKRKT<br>KTPSSVNNHNTKINE<br>DKDLYNFIDKIRDKTD<br>KSHLEDEYDEDDNTK<br>DGKFNKVEDEIKNDI<br>DSEEDDDIIEDNEHL<br>YDGEDSENLSSEGE<br>GDDLLEDLDQDQDEE<br>EVLGDEDNHYEMEG<br>LDNETYEDIDKDKKTE<br>VDSILTKRDREEQKTR<br>QATNRHQYRISSFLD<br>ENDENMVDEDTENN<br>KLEKRNKLIKRRRE<br>TIRQQNDNIKKDYDG<br>SVPSFKDGFVNSERYF<br>EDGDGDDDDDDDDF<br>DIGDNGQVNVLEEPD<br>KDKCLREYVCMGSPR<br>NEISKQFAKLLFEKEK<br>DGFNPIYQESIQKMC<br>AANKESLMINFTHLC<br>ASTVFGVWVAEIPTE<br>MIEIFDEVALKVVLRIY<br>PNYRNIVKSIHVRIITH<br>LPICESLRDIRQSNLN<br>KLTQVGGVITRRSNVY<br>PQLKHVKYDCVKCKT |
| XP_637579.1 | DdMCM2 | D. discoideus   | MCM2 |                                                                                                                                                                                                                                                                                                                                                                                                                                                                                                                                                     |
|             |        |                 |      | AAERRDLRAAMTSPV<br>GDPEFENEDEILGD<br>QTVRDEAEEDGEEL<br>FGDNMENDYRPMPE<br>LDHYDPALLDDEDDF<br>SEMSQGDRAAESE<br>MRRRDRAAGIHRDD<br>RDLGFGQSDDEDDV<br>GPRAKRAGEKAAV<br>GEVEDTEMVESIENLE<br>DTKGHSTKEWVSML<br>GPRTEIANRFQSFLRT<br>FVDERGAYTYRDRIRR<br>MCEQNMSFVVSYT<br>DLANKEHVLAYFLPE<br>APFQMLEIFDKVAKD<br>MVLISIFTYERVITTEI<br>HVRISELPLIELRTFR<br>KLHLNLQVRLGVVT<br>ATTGVLPQLSVIKYDC<br>VKCGYVLGPFVQSQN<br>TEIKPGSCPECQSTGP<br>FSINMEQTLRYNYQKI<br>TLQESPGRIIPAGRI<br>SKDVILLADLCDQCKP<br>GDELEVTGIYTNNDY<br>GSLNTDQGFVPVATV<br>IIANHVVKDSKQVV        |
| NP_477121.1 | DmMCM2 | D. melanogaster | MCM2 |                                                                                                                                                                                                                                                                                                                                                                                                                                                                                                                                                     |
|             |        |                 |      | TRGSRRGDLTSSPGR<br>DLPPFEDESEGLLGD<br>LPDEEDDDGEELIGD<br>AMERDYRVIPELDY<br>EAEGLDEDEDLSELS<br>SARAAEAAMRRRD<br>REQQLGMGRIGRGLL<br>YDSEEDDKRPTKRQ<br>RVLAERAAEGGAME<br>GEDEEMIESIENLED<br>MKGHTVREWVSMA<br>APRLEIYHRFKNFLRT<br>HVDEHGHNVFKERIS<br>DMCKENKESLLVNYE<br>ELASREHVLAYFLPEA<br>PAEMLKIFDEAAKEV<br>VLAMYPKYDRIAHEI<br>HVRIGNLPLVEELRSL<br>RQLHLNLQIRTSGVV<br>TSCTGVLPQLGMVKY<br>NCNKC�FILGPFQFS<br>QNQEVKPGSCPECQ<br>SLGPFEINMEQTVYQ<br>NYQRITIQESPGKVA<br>AGRLPRSKDAILLADL<br>VDMCKPGDEIELTGIY<br>HNNDYGSNLNANGF<br>PVFATVILANHIARKD       |
| NP_775364.2 | DrMCM2 | D. rerio        | MCM2 |                                                                                                                                                                                                                                                                                                                                                                                                                                                                                                                                                     |



|                |         |             |      |                                                                                                                                                                                                                                                                                                                                                                                                                                                                                                                                                      |
|----------------|---------|-------------|------|------------------------------------------------------------------------------------------------------------------------------------------------------------------------------------------------------------------------------------------------------------------------------------------------------------------------------------------------------------------------------------------------------------------------------------------------------------------------------------------------------------------------------------------------------|
| NP_004517.2    | HsMCM2  | H. sapiens  | MCM2 | QRRRGNDPLTSSPGR<br>SSRRTDALTSPPGRDL<br>PPFEDESEGLLGTGEP<br>LEEEDGEEELIGDGM<br>ERDYRAIPELDAYEAE<br>GLALDDEDVEELTAS<br>QREAAERAMRQRDR<br>EAGRGLGRMRRLLY<br>DSDEEDEERPARKRR<br>QVERATEDGEEDEE<br>MIESIENLEDKGHVS<br>REWVSMAGPRLEIH<br>HRFKNFLRTHVDSHG<br>HNVFKERISDMCKEN<br>RESLVVNYEDLAARE<br>HVLAYFLPEAPAEELLQ<br>IFDEAALEVVLAMYP<br>KYDRITNHHVRIHSL<br>PLVEELRSLRQLHLNQ<br>LIRTSGVVTSCTGVLP<br>QLSMVKYNCNKCNE<br>VLGPFQSQNQEVKP<br>GSCPECQSQAGPFEVN<br>MEETIQNYQRIRIQE<br>SPGKVAAGRLPRSKD<br>AILLADLVDSCKPGDE<br>IELTGIYHNNYDGSLN<br>TANGFPVFATVILAN |
| NP_032590.2    | MmMCM2  | M. musculus | MCM2 | QRRRISDPLTSSPGRS<br>SRRADALTSPPGRDL<br>PPFEDESEGLLGTGEP<br>MEEEDGEEELIGDGM<br>ERDYRPIPELDVYAE<br>GLALDDEDVEELTAS<br>QREAAERTMRQRDR<br>EAGRGLGRMRRLLY<br>DSSEEDEERPARKRR<br>HVERATEDGEEDEE<br>MIESIENLEDKGHVS<br>REWVSMAGPRLEIH<br>HRFKNFLRTHVDSHG<br>HNVFKERISDMCKEN<br>RESLVVNYEDLAARE<br>HVLAYFLPEAPAEELLQ<br>IFDEAALEVVLAMYP<br>KYDRITNHHVRIHSL<br>PLVEELRSLRQLHLNQ<br>LIRTSGVVTSCTGVLP<br>QLSMVKYNCNKCNE<br>LGPFQSQNQEVKP<br>GSCPECQSQAGPFEIN<br>MEETIQNYQRIRIQE<br>SPGKVAAGRLPRSKD<br>AILLADLVDSCKPGDE<br>IELTGIYHNNYDGSLN<br>TANGFPVFATIIILANH |
| XP_024380390.1 | PpaMCM2 | P. patens   | MCM2 | GDFDTRPLSSTGG<br>GRRGSMGGSEFDSE<br>NEAVEDRNLFIDEIIV<br>DQEEEDGEDLYDEN<br>FMQRDYQTLEEQR<br>YEVDGLDDEVEDTRD<br>FATIMADRRAAEANL<br>DERDGLNHSRVRKL<br>PTMLQEYDDDENEEY<br>QPARRRMRLHEPVA<br>SPVMSMSEHDETGD<br>NEEEDDEEDDGGTD<br>FLNVQGSIAEWVA<br>RDDVRRFVQRKFRRF<br>LETSSKEAMYKKVYR<br>DSLDNMVAANLCSLE<br>LNYGQWLDSCPELAI<br>WLADAPQPLLEIMEE<br>EANAFVLRHHHPNYSK<br>IHEKVYLRISNPLEDK<br>IRNIRQVHLDTLIKISG<br>VVTRSGVFPQLQQV<br>KYDCVKCGTILPFFQ<br>NTHTEIRVGSCPECQ<br>SRGPFTVNVEQTIYR<br>NYQKLTQESPNTVQ<br>AGRLPYKEIILLHDLI<br>DVARPGEEIEVTGIYV            |

|                |        |               |      |                                                                                                                                                                                                                                                                                                                                                                                                                                                                                                                                                        |
|----------------|--------|---------------|------|--------------------------------------------------------------------------------------------------------------------------------------------------------------------------------------------------------------------------------------------------------------------------------------------------------------------------------------------------------------------------------------------------------------------------------------------------------------------------------------------------------------------------------------------------------|
| -              | PpMCM2 | P. polyceph   | MCM2 | EEEYDPSIPKDKEAE<br>DVESETLSDGNQEA<br>MDDILDGEENVVYDP<br>EELEAINQGEDLYNG<br>DFEQDYEYDPNLDY<br>DEKDLDENEYAEMG<br>PEERAAAAEAIKKRN<br>RKVQKAKTGRLPSAL<br>LYDTDEEDAKPEYKP<br>RRRKRPVNDPNVGN<br>VFVEEDTRDLGOLD<br>VNLEDVKGPLREWIS<br>LDPTKRTIMRRFRKFL<br>KTYGPAKAPFYQQA<br>QTMCAANQESLLVN<br>HNHLTQTEPLIAIWT<br>ADAPTEMIQIFDEVA<br>MKLVLEMFPNYENIC<br>PEVHVRTNLPVSDSL<br>RELRQIHLNCLVKVSG<br>VVTRRTSVFPQLKYVK<br>FDCLKCSTILGPYYQD<br>GQAEIKVGICPNCQS<br>KGPFAINAEQTVYQC<br>KKKKKKKKKKKKKKK<br>KKKRSKEVILLWDLID<br>SARPGEEVEVTGIYRH<br>NFDEHLNKTGHFPVF        |
| NP_009530.1    | ScMCM2 | S. cerevisiae | MCM2 | DSENELPPSSPQQHF<br>RGGMNPVSSPIGSPD<br>MINPEGDDNEVDV<br>PDIDEVEEQMNEVDL<br>MDDNMVEDYAADH<br>NRDROYDPDQVDDRE<br>QQELSLSERRRIDAQL<br>NERDRLRNVAIIDD<br>EDEEQEGAAQLDEM<br>GLPVQRRRRRRQYED<br>LENSDDLLSDMDID<br>PLREELTLESLSNVKA<br>NSYSEWITQPNVSRTI<br>ARELKSFLLEYDETG<br>RSVYGARIRTLGEMN<br>SESLEVNRYRHLAESKA<br>ILALFLAKCPEEMLKIF<br>DLVAMEATELHYPDY<br>ARIHSEIHVRISDFPTI<br>YSLRELRESNSSLVRV<br>TGVVTRRTGVFPQLK<br>YVKFNCLKCGSILGPF<br>FQDSNEEIRISFCTNC<br>KSKGPFRVNGEKTYY<br>RNYQRVTLQEAPGTV<br>PPGRLPRHREVILLAD<br>LVDVSKPGEEVEVTGI<br>YKNNYDGNLNAKNG |
| XP_001009217.2 | TtMCM2 | T. thermophi  | MCM2 | ADNDSASVSQEEAIE<br>ENQJVEEDDKSLSDE<br>GDGDDLLNIEDDYK<br>AVPELDQYEIDGLND<br>EDDFDDIDAEQRRLA<br>EEEIDERNYQKYANK<br>RRIPTALREFDLGEED<br>EEDLNVQLQRRRQFY<br>EAHNLYESEDEQME<br>EEEENKDEREYDKYLD<br>REQARGKLAVWIKKE<br>STVRYIRKTRKFLNKF<br>KDGSNQLVYKQRIQE<br>MCSKNKGSLEVDNF<br>HINSKHETIAMWIVT<br>EPVILPYLNDVAMET<br>VKKLYPDYEDIQPEIF<br>VRIENYTILDIRKLRH<br>KDLGQLIQVRAVVTQ<br>RSAIFSQKKVYYVCR<br>CGDRKGPYLSSENH<br>NLGTCPCVQSKGPFIL<br>DTEYTIYRNYQRLTIQ<br>EPPGSVPGRVPRQK<br>EVIVLGDNI DVARPG<br>DEIDVTGIFVHRYDYA<br>LNVKHGFPVFSTMIE<br>ANYIKRVREGDQSSL   |

|                |        |            |      |                                                                                                                                                                                                                                                                                                                                                                                                                                                                                                                                                     |
|----------------|--------|------------|------|-----------------------------------------------------------------------------------------------------------------------------------------------------------------------------------------------------------------------------------------------------------------------------------------------------------------------------------------------------------------------------------------------------------------------------------------------------------------------------------------------------------------------------------------------------|
| NP_001080759.1 | XIMCM2 | X. laevis  | MCM2 | AGSRRDALTSSPGRD<br>LPPFEDESEGMFGDG<br>VVPEEEEEGEELIGDA<br>MERDYRPISELDREYEV<br>EGLDDEEDVEDLTAS<br>QREAAEQSMRMRD<br>REMGRELGRMRRL<br>LYDSDEEEDRPARKR<br>RMAERAAEGAPEED<br>EEMIESIENLEDMKG<br>HTVREWVSMAATRL<br>EIYHRFKNFLRTHVDE<br>HGHNVFKEKISDMCK<br>ENKESLPVNYEDLAA<br>REHVLAYFLPEAPAE<br>MLKIFDEAAKEVVLV<br>MYPKYDRIAREIHVRI<br>SHLPLVEELRSLRQLH<br>LNQLIRTSGVVTCCTG<br>VLPQLSMVKYCNCK<br>CNFILGPFFQSQNQE<br>VRPGSCPECQSFQPF<br>EINMEETVYQNYQRI<br>TIQESPGKVAAGRLP<br>RSKDAILLADLVDSCK<br>PGDEIELTGIYHNNYD<br>GSLNTANGFPVFATV<br>ILANHITKKDDKVAV  |
| PWZ26529       | ZmMCM2 | Z. mays    | MCM2 | PGFSTDRLPPNNTTSR<br>GATDPSSYSDDGGEA<br>EVDPHVLPDDDDPA<br>AVVAPDEDEEGEDLF<br>NDNYLDDYRRMDEH<br>DQYESVGLDSDLEDE<br>RNLDEIMADRRAAEA<br>ELDAREVRTGATADR<br>KLPRMLHDQDTDDD<br>TNFRPRKRHRASFRQ<br>PSGPRTPRSSDDGDGA<br>ATPSSPGRSHRGMSS<br>GGDVPMTDQTDOD<br>PYEDEFDEEDEMNM<br>YRVQGTLEWVTRD<br>EVRRFIKKKFEFLTY<br>VHPKNDQGEFEYVRL<br>INEMVLANKCSLEIDY<br>KQFIYIHPNIAIWLAD<br>APQSVLEVMEEVAK<br>NVVFDLHKNYRNIHQ<br>KIYVRISNLPVVDQIR<br>NIRQIHLNTMIRIGGV<br>VTRRSQVFPQLQQT<br>YRNYQKLTQESPGIV<br>PAGRLPRYKEVILLND<br>LIDCARPGEEIEVTGIY<br>TNNFDLSLNTKNGFP     |
| NP_194494.2    | AtIPO4 | A thaliana | IPO4 | DNDARRQAEQIKRL<br>AKDPQVVPALVQHL<br>RTAKTPNVRQLAAVL<br>LRKRITGHWAKLSPQ<br>LKQHVKQSLIESITVE<br>NSPPVRRASANVVS<br>VAKYAVPAGWPD<br>LTFLLQCSQSAQEDH<br>REVALIFSSLTETIGN<br>TFRPYFADLQALLKC<br>MQDESSSRVRVAALK<br>AVGSFLEFTNDGDEV<br>VKFRDFIPSILDVSRKC<br>IASGEEDVAILAFEIFD<br>ELIESPAPLLGDSVKAI<br>VQFSLEVSCNQNL<br>STRHQAIQIVSWLAK<br>YKYNSLKKHKLVIPIQ<br>VMCPLLAESDQEDD<br>DDLAPDRASAEVIDTL<br>AMNLPKHVFLPVLEF<br>ASVHCQSTNLKFREE<br>SVTALGVISEGCFDL<br>MKEKLDTVLNIVLGA<br>LRDPELVVRGAASFAI<br>GQFAEHLQPEILSHY<br>QSVLPCLLIAEDTSEE<br>VKEKSHYALAAFCEN |

|                |          |               |      |                                                                                                                                                                                                                                                                                                                                                                                                                                                                                                                                                                                |
|----------------|----------|---------------|------|--------------------------------------------------------------------------------------------------------------------------------------------------------------------------------------------------------------------------------------------------------------------------------------------------------------------------------------------------------------------------------------------------------------------------------------------------------------------------------------------------------------------------------------------------------------------------------|
| XP_006838378.1 | AtriIPO4 | A. trichopoda | IPO4 | DNDARRQAEQJKRL<br>AKDPHVIPALLQHMR<br>TAKTANVRQLSAVLL<br>RKKITGHWMKLSPQ<br>VKDSVKSALMESITVE<br>HSPPVRRASANVVS<br>VAKYAVPAGEWPELL<br>PFLFQCSQSPQEDHR<br>EVALILFSSLTETIGEM<br>FRPHLATLQSLFLKSL<br>QDETSTRVRIAALKAV<br>GSFVEFVHVRDEVV<br>MVRELIPILNVSRQC<br>LANGDEEVAVIAFEIF<br>DELVESAPLLGSFVV<br>SIVQFSLEVSSSENLET<br>NTRHQAIQISWLAK<br>YKPKSLVKHKLVPIL<br>QVMCPLLAESHGD<br>DDDDDLADRAAAE<br>VIDTMAVNLPRKLVF<br>PPVLEFASIGYQNP<br>PKYREASVMALGVVS<br>EGCFELMKNKLEDVL<br>RIVLEALKDPEQLVRG<br>AASFALGQFAEHLQP<br>EIVTYYESVLPCLNSI<br>GDASEEVEQKSYAL                                |
| NP_490715.1    | CelMB-3  | C. elegans    | IPO4 | ADNDIRKQAEVYEKI<br>EGPTKVAALFEAYTH<br>HTNNSDARSTVLVFL<br>RRVLARDWDIAIWET<br>LNEENKQRIKAVLE<br>MIVHETELSIKKIADL<br>ISEIASNLIDDSGDMT<br>WGGVLELMDHCLKS<br>EDLTGNYIALILRGCP<br>IIFGNRLAHFLPTLKV<br>VLEKCMATPDLQIKA<br>TAVRAVIAFAVDNDE<br>EKDVRLMTSLVPSNV<br>LQVCNETSDEDDSDG<br>PLGEFAELASSLPKCL<br>NTHMSQVLQVTLAIA<br>GNKEKNEMVRQNAI<br>EVICSYMESAPKGLKK<br>YAPGALGPILETLISC<br>MTMDDDLNEWL<br>NEIEEEDYEDIPIAES<br>AIDRVACCINGKVML<br>PVFLPLVEKLLTSEDW<br>KMKHAALRAFSAVG<br>EGCQRSMEPHIEQIM<br>AHITNYVNDAPRV<br>QYACNAIGQMSSD<br>FAPTLQKKCHAAVIP                                  |
| XP_646718.1    | DdiIPO4  | D. discoideum | IPO4 | RALLQPNNDIIKAAT<br>DKLNKLLKSEYSLYLF<br>HLEESSPYDEIKQLSA<br>VLLRQKLVAHWTKFS<br>VESRKYIKDSILKLVIS<br>QPSQLVRRSISEVIIIA<br>RLEVATGTWGDLPFF<br>LLQLSSSPDITVRQIQI<br>HILDLSISNVDFLKYF<br>PQLPTVLSQAVIDPQL<br>SVRALAVKAIGSSIIYA<br>VQTDSKLPFIDLPTT<br>LQVIKQCIENEMEDD<br>VISAFEIFNDLVESPPYS<br>SIKAHIPLIVNFSIEIVK<br>QPEIDNSIKTIALEFLE<br>TCIKYQPKILKNSNLL<br>NPILEILFKILTFESDSSI<br>DENDYEYNILQSASV<br>AIKECGKSYSSKLIYPI<br>LPTLKQFLESENVNVR<br>NAVMMVIIQQLSYGCIE<br>TMKDDLDNIIQFVLR<br>GLKDQEKVRSACV<br>TIGKLSQTLTPEIYKYT<br>NQVFPLLFQQLSDPD<br>DQFILRCFALENFLL<br>NLDSQELIPLPNVMD |

|             |           |                 |      |                                                                                                                                                                                                                                                                                                                                                                                                                                                                                                                                                    |
|-------------|-----------|-----------------|------|----------------------------------------------------------------------------------------------------------------------------------------------------------------------------------------------------------------------------------------------------------------------------------------------------------------------------------------------------------------------------------------------------------------------------------------------------------------------------------------------------------------------------------------------------|
|             |           |                 |      | ERIRESTAKMLKAYEN<br>PDSLLVLTQIVMSDRP<br>VQERQVAAVLLKRRV<br>KKLRHWQLVPAEHQ<br>AAIKSNMLQVLIQV<br>EKTVMGTVAFIIGSLV<br>RHEEDKQNSWREEIL<br>KFIYERCSPPIESER<br>GSSIFSSLMDAAPDQ<br>FSNHTDTIFPLLAGILV<br>TAEANGNMATPTVH<br>NMLAGTCVLLPFISG<br>HSDAEQIMVKAVPLI<br>LKALAAFAEKGNSNE<br>FMGAFDIIDSMAEYV<br>PHLLTGNVKLLLEFCL<br>MIARNKQFDASIRVQ<br>VLTQVGLVRLKKII<br>MKQKLLQPTLSVLF<br>VICQDDLKEDDDYFSS<br>ESLNSPSNAAQTL<br>LMALHMVDPKFIPPL<br>LDLLEPALQSPVLR<br>RSSFCMGVIAEGCSE<br>AIGKKYLEVMLNIIKA<br>GVLDVSMFVRTAAFF<br>ALGQFSEFLQPTICKF<br>APQILPVLFQDYNQLV |
| NP_730184.1 | DmArtemis | D. melanogaster | IPO4 |                                                                                                                                                                                                                                                                                                                                                                                                                                                                                                                                                    |
|             |           |                 |      | ERIRESTAKMLKAYEN<br>PDSLLVLTQIVMSDRP<br>VQERQVAAVLLKRRV<br>KKLRHWQLVPAEHQ<br>AAIKSNMLQVLIQV<br>EKTVMGTVAFIIGSLV<br>RHEEGEQNSWREEIL<br>KFIYERCSPPIESER<br>GSSIFSSLMDAAPDQ<br>FSDHTDTMFPLLAGIL<br>VTAEANGNMATPTV<br>HNMLTGSCFLLPFVS<br>GHSNAEQIVVKAVPL<br>ILKALAAFEKGYSEIF<br>MGAFDIIDSMAEHVP<br>HLLTGNVKLLLEFCLM<br>IARNKQFDASIRVQV<br>LTFVGLVRLKKIIM<br>KQKLLQPTLSVLFVI<br>CQDDLEEGDDYFSS<br>ESLNSPSNAAQTL<br>MALHMVDPKFIPPL<br>DLLEPALQSPVLR<br>SSFCMGVIAEGCSEA<br>IGKKYLEVMLNIIKAG<br>VLDVSMFVRTAAFFA<br>LGQFSEFLQPTICKFA<br>PQILPVLFQDYNQLV     |
| NP_730182.1 | DmApollo  | D. melanogaster | IPO4 |                                                                                                                                                                                                                                                                                                                                                                                                                                                                                                                                                    |
|             |           |                 |      | NAVIQQTAEKQAF<br>KDPALPILCAVMTG<br>SQNPQVLPFIPAFIKF<br>SLFFNVKLLCVLLQVR<br>QSAVMMLRMVRK<br>QWKKISPDHRESLKA<br>VVLQAFQTEHTVR<br>HSLQSLSAVLKHETP<br>DRWPALLELNQSTK<br>SNNPQDRQVGLLLS<br>KVVGSNPEPFKPHYK<br>QLLQLFGTVLQDLNN<br>PTALYICITLTAITAY<br>TGTEEMNLMRSLIPK<br>LLVALKHILQADQDQ<br>ASEAMEVDFELMESE<br>VSIVVPHIAEIVRFCL<br>ISADASLSDSLVRKAL<br>SCIAVLIRLKNKAVLK<br>HKLLQPIQVVFPIISA<br>APPPGEEDPEDEEND<br>TGGDSENPKHFAVQ<br>VIDTMLHMPPEKLF<br>NQLLPFTQACLSSEN<br>PYERKGGMLCMAVL<br>AEGCADHIRTMLSS<br>MLQTVCRSLSDNNQ<br>VVRSAALFALGQFSE           |
| F1QIP3      | DrIPO4    | D. rerio        | IPO4 |                                                                                                                                                                                                                                                                                                                                                                                                                                                                                                                                                    |

|                |          |             |      |                                                                                                                                                                                                                                                                                                                                                                                                                                                                                                                                                                |
|----------------|----------|-------------|------|----------------------------------------------------------------------------------------------------------------------------------------------------------------------------------------------------------------------------------------------------------------------------------------------------------------------------------------------------------------------------------------------------------------------------------------------------------------------------------------------------------------------------------------------------------------|
| NP_078934.3    | HslIPO4  | H. sapiens  | IPO4 | DTERIRRATEQLQIVL<br>RAPAAPALCDLLAS<br>AADPQIRQFAAVLTR<br>RRLNTRWRLAAEQ<br>RESKSLILTALQRETE<br>HCVSLSLAQLSATIFR<br>KEGLEAWPQLQLLQ<br>HSTHSPHSPEMGL<br>LLLSVVVTSRPEAFQP<br>HHRELLRLNETLGEV<br>GSPGLLFYSLRTLTTM<br>APYLSTEDVPLARML<br>VPKLIMAMQTLPIDE<br>AKACEALEALDELLES<br>EVPVITPYLSEVLTFCCL<br>EVARNVALGNAIRIRI<br>LCCLTLFLVKVSKALLK<br>NRLLPPLLHLTFPIVA<br>AEPPPGQLDPEDQDS<br>EEEELEELMGETPKH<br>FAVQVVDMLALHLP<br>PEKLCQQLMPMLEEA<br>LRSESPYQRKAGLLVL<br>AVLSDGAGDHIRQRL<br>LPPLLQIVCKLEDPS<br>QVVRNAALFALGQFS<br>ENLQPHISSYSREVM<br>PLLLAYLKSVP LGHTH      |
| NP_077229.4    | MmlIPO4  | M. musculus | IPO4 | DTERIRRATEQLQITL<br>RDPAAPALFDLLATA<br>TDSQIRQFAAVLTRR<br>RLNNRWRLAPEQR<br>ESLSLVLTAQKETV<br>HSVSVSLAQLSATIFR<br>KEGLQGWQPQFMNLL<br>QHSTHSSHSPKEVG<br>LLLSVVVSSQPEAFH<br>AHQHELLQLNETLS<br>DVSFPGVLFYSLRTL<br>AIARYVRPDDVSLAR<br>MLVPKVVTALRTLPL<br>DEVKACEALEALDEM<br>LETELPIINPHLSEVLT<br>FCLEVAKNVALGEPL<br>RVRVLCCLTLFLVKVKS<br>KALLKNRLVPLLHAL<br>FPLMAAEPPMGQLD<br>PEDQSDDDDDLEIGL<br>MGETPKHFAVQVVD<br>MLALHLPPEKLCPHV<br>MPMLEEALRSEDPYQ<br>RKAGFLVLAVLSDGA<br>GDHIRQRLLYPLLQIV<br>CKGLDDPSQIVRNAAL<br>LFALGQFSENLPQPHIS<br>SYSEEVMPLLLSYKLS           |
| XP_024374755.1 | PpalIPO4 | P. patens   | IPO4 | DNASRKQAEQIRRL<br>SKDPLLVPALLHHVRC<br>SPYPEVRQLAAVLLRK<br>KITGHWMLQSAEMR<br>NNVKSTLLESITLENSP<br>PVRRGSADVVSVAK<br>HAVPAGIEWPELLPFL<br>HQCSQSAQEDHREV<br>ALILFSSLTETIGDLLRP<br>HFATLQSVFITGLND<br>QQSNRVRVAALKAV<br>GALVGVIQSEQVVM<br>MFRELIPILNVSRCL<br>ANGDEDVAILAFEIFD<br>ELIESAAPVLGPTIPVI<br>VQFALEVCSNKHLEA<br>NTRHQAIQIIFWLAK<br>YKPKTLVKHKMVTPIIL<br>SVICPILAEPESTRTHED<br>DIACERAAA EVLDTM<br>ATSLPKKHVFPVPLHF<br>ATSNFHNPDPNYRD<br>AAVMSLGVISEGCYE<br>AMKSRLEDVLSLVLEA<br>LKDKQAVRGAASFA<br>LGQFAEHLQPEISEHY<br>ERVLPICIFAVLSDAVP<br>DVQEKAFYALAAFCE |

|                |          |               |      |                                                                                                                                                                                                                                                                                                                                                                                                                                                                                                                                                                         |
|----------------|----------|---------------|------|-------------------------------------------------------------------------------------------------------------------------------------------------------------------------------------------------------------------------------------------------------------------------------------------------------------------------------------------------------------------------------------------------------------------------------------------------------------------------------------------------------------------------------------------------------------------------|
| -              | PpIPO4   | P. polyceph   | IPO4 | ALHPNTEIVRAAVTQ<br>LNAALDTPQSTMFL<br>ALLQQSPHPTHVKQFA<br>AVVMRKRVVGHYYK<br>LPQNERGVLKASLL<br>MLHSDTKVEVIVRRA<br>VADVVTGKAIVPR<br>GDWNVLLPTILNAAS<br>SAVLIEDREIAMYLLA<br>AVIDSLGDQMRHY<br>ASLHTLLAACLRDSNP<br>SIRSLALHTTSALIPWL<br>VTKDDIALYGSILPLVV<br>DVVKYFVQNEMDDD<br>AIESFSILEDLVETPIPV<br>ITKFIPALVNLMEICA<br>NHQVDISVRQSALSF<br>VQLVVRVKPKMVVK<br>NKLVTPTLAAAFAMC<br>AEGEGNDEAQQDLY<br>EQEETLSPYIFGSQVI<br>DTVLSLPVNQVIGP<br>SLALVAQYGRPEMHF<br>RORRAAITAITLVEG<br>CAESIKDTLAKVVQYV<br>VGALVDPFSLVRQAA<br>CLAIGQCADNLQPEII<br>DYHNVVVPALLQGLR                     |
| NP_011035.1    | ScKap123 | S. cerevisiae | IPO4 | AITSGVGLKEATKTLQ<br>TQFYTQPTTLPALIHIL<br>QNGSDDSLKQLAGV<br>EARKLVSKHWNAIDE<br>STRASIKTSLQTAFSE<br>PKENVVRHSNARVIASI<br>GTEELDGNKWPDLV<br>PNLIQTASGEDVQTR<br>QTAIFILFSLLEDFTSSL<br>SGHIDDFLALFSQTIN<br>DPSSLEIRLSAQALN<br>HVSALIEEQETINPVQ<br>AQKFAASIPSVVNVL<br>DAVIKADDTMNAKLI<br>FNCLNDFLLDSQLTG<br>NFIVDLIKLSQJAVNS<br>EIDEDVRVFALQFISS<br>LSYRKSKVSQSKLGPE<br>ITVAALKVACEIDVD<br>DELNNEDETGENEEN<br>TPSSSAIRLLAFASSEL<br>PPSQVASVIVEHIPA<br>MLQSANVFERRAILL<br>AISVAVTGSPDYILSQ<br>FDKIIPATINGLKDTEP<br>IVKLAALKCIHQLTDD<br>LQDEVAKFHIEEYLPJII<br>DIIDSAKNIVIYNYATV |
| NA             | NA       | T. thermophi  | IPO4 |                                                                                                                                                                                                                                                                                                                                                                                                                                                                                                                                                                         |
| XP_018114829.1 | XIIPO4   | X. laevis     | IPO4 | NAVIQQATAQLKEAF<br>KDPQIIPALFEILRGSQ<br>ELQIRQFAAVLLRRRL<br>NKHWWKAVQPEQQH<br>NLKIVLESIQREPEHK<br>VRYALQQLIAVILKNE<br>RLEHWPEFIKVLQLS<br>HSDVPDQKQVILVL<br>WCSLHLKASLFQPHV<br>HDLGLFKQTLSDLN<br>NGPLIYYTVQSLTCILP<br>YIVGNETNLLRPFIPKI<br>LAAIRQLILVNQVQA<br>CEAMEFFDVLMEDE<br>VPVIVHYIADTVQFCL<br>EMAVNTSLSDELRVK<br>ALSCIMCLIKKSKSIIK<br>QKLLPQILNLFPIIMC<br>AAPPAGEMDKEDQE<br>EEDDDIEDSVETPKEY<br>AMQVIDMLALHLPP<br>EKLKELSPLMEPCLLS<br>SNPYPRKAGLMCLAV<br>LSEGCDFICDKHLQP<br>MLSLVCQSLSDDNQV<br>VRNAALYALGQFSEH<br>LQPDITNYSYDTVLP<br>LEYFSRVDPSTAHLT               |

|                |          |               |       |                                                                                                                                                                                                                                                                                                                                                                                                                                                                                                                                                                  |
|----------------|----------|---------------|-------|------------------------------------------------------------------------------------------------------------------------------------------------------------------------------------------------------------------------------------------------------------------------------------------------------------------------------------------------------------------------------------------------------------------------------------------------------------------------------------------------------------------------------------------------------------------|
|                |          |               |       | DNDARRQAEQJRRRL<br>ARDPQVVPALVHHL<br>RTAKTPNVRLAAVL<br>LRKKITSHWPKLPADS<br>KASKLQALIDSITLDHS<br>HPVRRASANVVSIAK<br>YAIPAGEWPELLPFLF<br>QCSQSPQEDHREVAL<br>ILFSSLTETIGATFQSH<br>LNNLQPILLKCLQDET<br>SSRVRIAALKAVGSFI<br>EYVNDGGDIVKMFRL<br>DFVPSILNISRQCLAN<br>GEEDVASIAFEIFDELI<br>ESPAPLLGDSVRSIVQ<br>FSLEVSANQDLEINIR<br>QQAIQIISWLVKFKAS<br>FLKHHKLVVPIQVM<br>CPLLTETANEDESDL<br>AADRSAAEVIDTMAI<br>NLPRHVLAPVLEFASL<br>SFHHINPKYREAAVTS<br>LGVISEGCCHEHLKDKL<br>EDCLKIVLEALKDQEQ<br>MVRGAASFALGQFA<br>EHLQPEILSHYASVLP<br>CILNALEDPSDEVKEK<br>SYALAAFCEDMGED |
| ONL96235.1     | ZmlIPO4  | Z. mays       | IPO4  |                                                                                                                                                                                                                                                                                                                                                                                                                                                                                                                                                                  |
|                |          |               |       | GVPPKAGNTYSIDVK<br>NFISRARALYEHWKK<br>HSADLWGSADALAIA<br>TPPASDDLRLKSSAL<br>NIWLLGYEFPDTIMV<br>FTKKQHFLCSRNKAS<br>LLEVVKKPAHDELKLD<br>VIMHVKPKGDDGTG<br>LMDAIFRAIRDLRG<br>DGNDSQVVGHIARE<br>APEGKLLTWTTERLK<br>NANFQFVDITGGLSD<br>LFAVKDDTEVMSVKK<br>AAYLAYSVMKNVVV<br>PNLESAIDEEKDVTSH<br>ALMDLTEKAILEPTKA<br>SVKLKPENVDICYPPIF<br>QSGGKFDLKPSAASN<br>DELLTYDPASIIICAVG<br>ARYNSYCSNVARTYLI<br>DATSLQSKAYEVLLKA<br>HEAAIDALRSGRKINT<br>VYQAALSVVEKNAPE<br>FVDKLTKSAGTGIGLE<br>FRESGLNINAKNDKV<br>LRPKMAFNVS LGFQ<br>NLECESESRSKKNKFS<br>LLLADTVLVTQKPEL         |
| NP_001329034.1 | AtSPT16  | A thaliana    | SPT16 |                                                                                                                                                                                                                                                                                                                                                                                                                                                                                                                                                                  |
| W1NNZ7         |          |               |       | NASKSSSYQIDLDTFSS<br>KRLKAFYSSWEENRD<br>SLWASADAIAVATPP<br>PSDDLRYLKSSALNIW<br>LLGYEFPETIMVFTSK<br>QIHFLCSQKKANLLET<br>LGKSAKSALNLEVLH<br>VKAKNEDGASQMEEI<br>FNAIKSHAESKVVV<br>GHIAREAAEGKLLT<br>WREKLELNFQLGDVT<br>NGFSELFVAVKDENEIT<br>NVKKASFSLASVLKNF<br>VVPKLEVIIDEKKVT<br>HSSLMDTTEKAILDP<br>AKSKVKLKAENVDICY<br>PPIFQSGGQFDLRPN<br>SSSNDDHLYDATSVI<br>ICAIGSRYSYCSNVA<br>RTYLIDADDIQNRAY<br>NVLFKAHEAAIGSLKP<br>GKKIGEAYKAAMEVV<br>EREAPEFASNLTKSAG<br>TGIGLEFQESGLRLNA<br>KNDRLVKAGMIFNVVS<br>LGFQNLKAPTNNPKT<br>ESFSLLLADTVIVREN<br>VPEVATSTSSKAFKDV    |
|                | AtrSPT16 | A. trichopoda | SPT16 |                                                                                                                                                                                                                                                                                                                                                                                                                                                                                                                                                                  |



|             |         |                 |       |                                                                                                                                                                                                                                                                                                                                                                                                                                                                                                                                                                          |
|-------------|---------|-----------------|-------|--------------------------------------------------------------------------------------------------------------------------------------------------------------------------------------------------------------------------------------------------------------------------------------------------------------------------------------------------------------------------------------------------------------------------------------------------------------------------------------------------------------------------------------------------------------------------|
|             |         |                 |       | RAERLYEHWEKGAD<br>GLDSIKSLAFVYGETD<br>NPYTKTSALFTWLF<br>HEIADTVLLKKDHIYI<br>LGSNRKVEFFGVS<br>DNQSSGKVPTVSTLL<br>RDKTDKDAGNFEKLI<br>DHIKSAGGDVGNFVK<br>EKFSSEFVSSWNKALE<br>EGGVNKNDDTLAFTH<br>LFAVKDDKEMDLIRK<br>SAQATTASWTAARA<br>RYVEIIDQEKVRHVS<br>LSNEFAAFMKDSKVQ<br>QALAKYEADTCYDPI<br>VMSGGNYSFKWNHE<br>SSESHLSQFGTIITSF<br>GARLSEYCTNLTTRTM<br>LIFPSSELETAYEAILA<br>AELAVIAALPGAKLS<br>DVYKIGIDLTLEKSPKL<br>AETLNKKELGFATGIE<br>FRESRLAISAKCDEVV<br>KAGMVFIVYIGVDSIP<br>NKNKGEKGKPAIAI<br>SDTILVKEEGDNEILTE<br>KAKSRLKSNVIKFKEE<br>QENREAEKDNDQKK                  |
| NP_492821.1 | CeSPT16 | C. elegans      | SPT16 |                                                                                                                                                                                                                                                                                                                                                                                                                                                                                                                                                                          |
|             |         |                 |       | AVPTGPREATLDAGN<br>FCKRVKILYDSWNSD<br>SNLWKSANSLVLALG<br>QPNESNPKVTSLSQ<br>TWLFGVELKDTIIVFLE<br>KEIVIVSTSKINLFQK<br>LSETEQVKTELSSIKFN<br>FLTIDKSDKNKSNFEK<br>LIGEATKAGSNIGVIIK<br>ETYIGDLALQWEAAL<br>NECPLTKVDITPALSS<br>CLLVKDLQEQKNIITS<br>AKITSKVLKSHILPKIET<br>IIDKGERQTHNQLAD<br>YAADIFESPEKISSKLT<br>VEHVDYSYVPIIQSGG<br>IYDLRASASSDDNPLH<br>FGTIIVSCGARYKNYC<br>SNIARTYIIDPTSDQK<br>KNYAILLNVQSNVIKA<br>IKPDVTFSSLYEKAIQT<br>IKESSKPELVDFHFPKN<br>VGYGIGIEFQESLAVL<br>NATNSRTLKAGMTL<br>NIACGFQKISNPEGK<br>DEKSKTYLSLISDTVLL<br>NDEGKVEVLTDVGKK<br>ASDVVYMLGGEDDD |
| XP_640196.1 | DdSPT16 | D. discoideus   | SPT16 |                                                                                                                                                                                                                                                                                                                                                                                                                                                                                                                                                                          |
|             |         |                 |       | KRLYTEWRAPSIGHD<br>DALRNLDCIMSIVGV<br>EEDVMYSKSMALQL<br>WLLGYELTDTSVFCS<br>DAVYFLTSKKKIEFLK<br>QTQNITEEGFPEINLL<br>VRDRTDKDQGNFEKL<br>IKALQNSKKGKRLGV<br>FAKDAYPGEFSEAWK<br>KSLTASKFEHVDISTII<br>AYLMCPKDESEINNIR<br>KASLVSMDFINKYLK<br>DEIMDIIDSDRKVKH<br>NKLSDGCEAAIGEEK<br>YTSGLDPRLLDMAYP<br>PIIQSGGAYSLKFS<br>ADKNPLHFGVIVCSL<br>GARYKSYCSNISRTFL<br>VNPTEAMQENYTFLLV<br>SVQEEILKLLVPGTKLC<br>DVYEKTLDFVKKEKPS<br>MVDNLPKSGGFAMG<br>LEFRENSIVIGPKCQA<br>LLKKNMVFNLHVGIS<br>NLTNPEATDKEGKNY<br>ALFIGDTVLVGEQSPA<br>SVMTPSKKKIKNVGIF<br>IKDDSDDEEDVDDKKT              |
| NP_476610.2 | DmSPT16 | D. melanogaster | SPT16 |                                                                                                                                                                                                                                                                                                                                                                                                                                                                                                                                                                          |

|                |         |             |       |                                                                                                                                                                                                                                                                                                                                                                                                                                                                                                                                                            |
|----------------|---------|-------------|-------|------------------------------------------------------------------------------------------------------------------------------------------------------------------------------------------------------------------------------------------------------------------------------------------------------------------------------------------------------------------------------------------------------------------------------------------------------------------------------------------------------------------------------------------------------------|
| NP_001091053.1 | DrSPT16 | D. rerio    | SPT16 | RLYGNWKKGEDEFG<br>KVDAIVSVGVDEEIV<br>YAKSTALQTWLFGYE<br>LTDTIMVFCEKIIFLA<br>SKKKVEFLKQVAVTK<br>GNENANGVPPITLLV<br>REKNESNKVNFDKMI<br>EAIRGSKEGKTGVGFI<br>KDKFPGEYMKSWSD<br>TITAEGLQKVDISTVV<br>AYTMAVKEDGELAL<br>MKKAASITTDVFSKFF<br>KERVMEIVDADEKVK<br>HSRLAESVEKAIEDRK<br>FLGGVDPSTVEMCYP<br>PIIQSGGNYSLKFSVV<br>SDKNHMHFGAITCA<br>MGIRYSYCSNLVRTL<br>MVDPSQEMQDNYN<br>FLLQVEEELLKEMKH<br>GVKLSEAYNAVMEFV<br>KKEKPDVLSKLTKNLG<br>FAMGIEFREGSLVIN<br>QKNQFKLKRGMVFSI<br>SLGFADMINKEGKKE<br>EQKKYALFIGDTIQIN<br>EEDQATVLTTPVKKIK<br>NVGIFLKNDDDEDE         |
| NP_009123.1    | HsSPT16 | H. sapiens  | SPT16 | RLYSNWRKGEDEYA<br>NVDAIVSVGVDEEI<br>VYAKSTALQTWLFGY<br>ELDTIMVFCDDKIIIF<br>MASKKKVEFLKQJAN<br>TKGNENANGAPAITL<br>LIREKNESNKSSFDKM<br>IEAIESKNGKKIGVFS<br>KDKFPGEFMKSWND<br>CLNKEGFDKIDISAVV<br>AYTIAVKEDGELNLM<br>KKAASITSEVFNKFFK<br>ERVMEIVDADEKVRH<br>SKLAESVEKAIEKKYL<br>AGADPSTVEMCYPPII<br>QSGGNYNLKFSVSD<br>KNHMHFGAITCAMG<br>IRFKSYCSNLVRTLMV<br>DPSQEVQENYNFLQ<br>LQEELLKLRHGVKIC<br>DVYNAMDVVKKQK<br>PELLNKITKNLGFGM<br>GIEFREGSLVINSKNQ<br>YKLKKGMMVFSINLGFS<br>DLTNKEGKKPEEKTY<br>ALFIGDTVLVDEDEGP<br>ATVLTSVKKVKKNVGI<br>FLKNEDEEEEEKDE       |
| NP_291096.2    | MmSPT16 | M. musculus | SPT16 | RLYSNWRKGEDEYAS<br>IDAIVSVGVDEEIVY<br>AKSTALQTWLFGYEL<br>TDTIMVFCDDKIIIFM<br>ASKKKVEFLKQJANTK<br>GNENANGAPAITLLV<br>REKNESNKSSFDKMI<br>DAIKESKSGKKIGVFS<br>KDKFPGEFMKSWSD<br>CLNKEGFDKVDISAV<br>VAYTIAVKEDGELNL<br>MKKAASITSEVFNKFF<br>KERVMEIVDADEKVR<br>HSKLAESVEKAIEKK<br>YLAGADPSTVEMCYP<br>PIIQSGGNYNLKFSVV<br>SDKNHMHFGAITCA<br>MGIRFKSYCSNLVRTL<br>MVDPTQEVQENYNF<br>LLQLQEELLKLRHGV<br>KICDVYNSVMDVVKK<br>QKPELLNKITKNLGFG<br>MGIEFREGSLVINSKN<br>QYKLKKGMMVFSINLG<br>FSDLTNKEGKKPEEKT<br>YALFIGDTVLVDEDEGP<br>ATILTSVKKVKKNVGI<br>FLKNEDDEEEEEKDE |

|                |          |                |       |                                                                                                                                                                                                                                                                                                                                                                                                                                                                                                                                                            |
|----------------|----------|----------------|-------|------------------------------------------------------------------------------------------------------------------------------------------------------------------------------------------------------------------------------------------------------------------------------------------------------------------------------------------------------------------------------------------------------------------------------------------------------------------------------------------------------------------------------------------------------------|
|                |          |                |       | QINLELYGKRLLNN<br>KWKEHKEMWGGGA<br>DAIAVVTPPASEDLRY<br>LKSTALHIWLLGYEFP<br>ETVMVFMFGALHFV<br>CSSKKAHLEELQKSS<br>KMLTGVDIHHMKER<br>KQDGSVQMNNSVLDA<br>VKGFSKGKTPTVGVL<br>SREATEGSVMEKWA<br>ECLEASGAATVDVSG<br>GFSEIFAVKDEEEISNI<br>KNASHLSAAILKSFVV<br>PKLEVIIDEEKVTHFE<br>LMEQTENVITNPGKY<br>VKLKAEDVDICYPPVF<br>QSGGVFDLKPASVSN<br>EEPLYDTLGVILCAIG<br>ARFRSYCSNVARSIMI<br>DADKTQEKAYKILLKA<br>HEAAIAALRPGNAM<br>SVAYKAAYAVVESGG<br>PEFLPYFTKNAGTGIG<br>IEFRESGLTLNAKNER<br>VIRPGMAFNVSLGFH<br>NLTTESNPKSKTFSLL<br>LADTAIVVEKGPPPEVP<br>TLKCSKTYTDIAYSFKD |
| XP_001783705.1 | PpaSPT16 | P. patens      | SPT16 | KLDKSFWRVRKALY<br>DSWQKKDDYLWKG<br>DALVIAQGTDDNDP<br>YKKTNALQYWLLGYE<br>FADTIIVFCESNIYVLT<br>SPKKIGLLEVLKEENA<br>PYVLCFLQLSKAENN<br>QNLNTLFEAVHKS<br>GKSGVLPEKMQGA<br>LGSWEALAKSGLTL<br>VDVAPGYSEMLSVKD<br>TVEMKLLQAAETTS<br>KVMSNFLIPAVETVID<br>EGTQKSHALAEEME<br>EVFAQPEKINSKLVGE<br>HVESYPIIQSGGKY<br>DLKLSATNDNENLHF<br>GTIVCALGARYGYCS<br>NAARTFFIDPKKEVEI<br>NYRFLLEVHNIVVKS<br>KPGVKISVIMDKATY<br>IADKRPELSSFLKCC<br>GYGIGIEFQETYLMLS<br>SKNTRTIKPGMAFNI<br>MVGFQNLKEEKP<br>PKNKVYSMLLADTVI<br>VSETGEAEVLTVSVSK<br>RFGDVSFYIEELDNEE                 |
| -              | PpSPT16  | P. polycephala | SPT16 | LLYSKYNEFEKSPNSL<br>LFVLGSSNAENPYQK<br>TTILHNWLLSYEFPAT<br>LIALVPGKVIITSSAKA<br>KHLQKAIIDFKDPESK<br>ITLELWQRNNKEPEL<br>NKKLFDDVIALINSAG<br>KTVGIPEKDSYQKGF<br>MTEWNPVWEAAVK<br>ENEFNVIDISGLSKV<br>WEVKDVNEQAFLSV<br>SSKGSDKFMLLSNE<br>MVRVDEELKITNAK<br>LSDKIENKIDDVKFLK<br>QLSPDLSALCPPNYKF<br>NFDLLDWTSYPIIQSG<br>KKFDLRVSARSTNDQ<br>LYNGGICILASGIRYN<br>NYCSNITRTFLIDPSEE<br>MANNYDFLLTLQKEI<br>VTNILKPGRTPEVYE<br>SVIEIEKTKPELVNPF<br>TKNIGSLGLEFRDSN<br>FILNVKNDYRKIQRG<br>DCFNISFGFNLLKDS<br>QSANNYALQLADTV<br>QIPLDETEPPRFLTNY<br>TKAKSQISFYFNNEE   |
| NP_011308.1    | ScSPT16  | S. cerevisiae  | SPT16 |                                                                                                                                                                                                                                                                                                                                                                                                                                                                                                                                                            |

|                |         |                 |       |                                                                                                                                                                                                                                                                                                                                                                                                                                                                                                                                                       |
|----------------|---------|-----------------|-------|-------------------------------------------------------------------------------------------------------------------------------------------------------------------------------------------------------------------------------------------------------------------------------------------------------------------------------------------------------------------------------------------------------------------------------------------------------------------------------------------------------------------------------------------------------|
|                |         |                 |       | QLLSVWNKQPQYAN<br>IDAFIINKGKQGGN<br>KIKTSAISMWYFGFD<br>FIDTILLITKKTFAIIGG<br>NKKINMLKSVQEHAE<br>AKEYNLVFIKEDQAN<br>NSNQLQQLFEILDKD<br>LNKSSFNIGTLAKEQQ<br>VGPFMTEDSFIDK<br>NQYKFADCSFVQD<br>CLSVKDQNEISYIGKA<br>AKVSVYLESKLIKEIETI<br>IEDEGKTHSQIATMI<br>EGUENELKKISEEI<br>GGESDNLDAVPIV<br>QSGGKYDLKPNAQS<br>NEDILSYDTIIVSVGTK<br>YMEYHANIVRTLFDIP<br>TNDQKKIQRVYELQ<br>NQIAVQLKPGIKLKT<br>YENAVNFINEKVPQL<br>KDKIPANFGFGIGLEF<br>RESNLYINAKNEKEVE<br>EGMVFNVVVGFDNL<br>QSEKEKAYAIQSDTV<br>AIRKQNTPNAMVTFK<br>VSKKYEDISYSIQDEG<br>QDEEQEEEEDDLEKE    |
| XP_001018189.2 | TtSPT16 | T. thermophilus | SPT16 |                                                                                                                                                                                                                                                                                                                                                                                                                                                                                                                                                       |
|                |         |                 |       | RFFGSWKKGDDEFA<br>NVDAIVSVGVDEEI<br>VYAKSTALQTWLFGY<br>ELTDTIMVFCEKILF<br>MASKKKVEFLKQJAN<br>TKGNNANGTPAITL<br>LVREKQNESNKGNF<br>KMIEAIKVSCKGRIG<br>VFIKDFPFGDFMKS<br>YDILNKESFEKVDISAS<br>VAYTIAVKEEGELNL<br>MKKAASITSDVFSKFF<br>KDRVMEIVDADEKVR<br>HGKLAESVEKAIEDKK<br>YLGGTDPSTIEMCYP<br>IIQSGGNYNLKFSVVS<br>DKNHMHFGAITCAL<br>GIRKSYCSNLVRTLM<br>VDPTQEMQENYNFL<br>LQLQEELKELKHGAK<br>ICDAYQVIMDQVKK<br>QKPDLMKITKTGFG<br>AMGIEFREGSLVINN<br>KNQYKLLKGMVFSV<br>HGLAELNNKMGKK<br>PEEKTYALFVGDTVLV<br>NEEGAATVLTNVKKK<br>VKNVGIFLKKEDDEEE           |
| NP_001084166.1 | XISPT16 | X. laevis       | SPT16 |                                                                                                                                                                                                                                                                                                                                                                                                                                                                                                                                                       |
|                |         |                 |       | YAINIENFSKRLKVY<br>DHWKEHKSDDLWGSS<br>DAIAIATPPPSDDLRY<br>LKSSALDIWLLGYEFP<br>ETIIVFMHKQIHLVSS<br>QKKGNLIGTLKKAAN<br>EAVGVDIVLHVKT<br>SDGADLMDDIVHAA<br>RNQSKDKPVVGHIA<br>KEAPEGKLLTWWIKL<br>SSGSLRLVDVTNGFS<br>ELFAVKDTTEITCVKK<br>AAYLTSSVLKNFVIPKL<br>EKVIDEEKVSHSSLM<br>DDAEKAILDPLKVKVK<br>LKPDNVVICYPVVFQ<br>SGGKFDLPGASSND<br>EYLYYDSAIICAGSK<br>YSSYCSNVARTYLIDA<br>TPTQNKAYETLRKAH<br>EAAIQQVKPGNQMS<br>AVYQAAVAVIERDAP<br>ELLPNLTKSAGTGIGL<br>EFRESGLNLNAKNDR<br>RIKKGMVFNVSGLGH<br>NIQAETTSEKTKQFSL<br>LLADTVLVNERGHEIL<br>TAPCSKAFKDVAYSF |
| NP_001105557.1 | ZmSPT16 | Z. mays         | SPT16 |                                                                                                                                                                                                                                                                                                                                                                                                                                                                                                                                                       |

|                |           |               |       |                                                                                                                                                                                                                                                                                                                                                                                                                                                                                                                                                            |
|----------------|-----------|---------------|-------|------------------------------------------------------------------------------------------------------------------------------------------------------------------------------------------------------------------------------------------------------------------------------------------------------------------------------------------------------------------------------------------------------------------------------------------------------------------------------------------------------------------------------------------------------------|
|                |           |               |       | GGKNPGLLKINSGGI<br>QWKKQGGGKAVEV<br>DRSDIVSVSWTKVTK<br>SNQLGVKTKDGLYYK<br>FVGFRDQDVPSSLSSFF<br>QSSYGKTPDEKQLSV<br>SGRNWGEVDLHGNT<br>LTLVLGSKQAFEVSLA<br>DVSQTQLQGKNDVT<br>LEFHVDDTAGANEKD<br>SLMEISFHIPNSNTQF<br>VGDENRPPSQVFND<br>TIVAMADVSPGVEDA<br>VUTFESIAILTPRGY<br>NVELHLSFLRLQGQA<br>NDFKIQYSSVVRLL<br>PKSNQPHTFVVISLDP<br>PIRKQGTMYPHIVM<br>QFETDTVSELSISD<br>ELMNTKFKDKLERSY<br>KGLIHEVFTTVLRWLS<br>GAKITPKGFRSSQD<br>GFAVKSSLKAEDGVL<br>YPLEKGGFFLPKPPTLI<br>LHDEIDYVEFERHAA<br>GGANMHYFDLLIRLK<br>TDHEHLFRNIQRNEY<br>HNLYTFISSKGLKIMN           |
| NP_189515.1    | AtSSRP1   | A thaliana    | SSRP1 |                                                                                                                                                                                                                                                                                                                                                                                                                                                                                                                                                            |
|                |           |               |       | RGGTNPQGLRIHSGG<br>IVWRKQGGGKVVEV<br>GKSDLVGSWMKVP<br>KSYQLGVRIKAGLVYK<br>FIGFREQDVNNLNSFI<br>SNTLGITPQEKQLSVS<br>GRNFGIEELNGNMLT<br>FLVGSKQAFEVSLAD<br>VSQTQLQGKNDVSLE<br>FHVDDTTGANEKDSL<br>VELAFHIPNSNTTFVG<br>DETRPPAQVFRDKIM<br>SMADVGPSGEEAVV<br>TFDGIAVLTPRGYTV<br>ELHISFFRLLGQANDF<br>KIQYSSVVRFLVLPKF<br>NQPHTFVIITLDPPIR<br>KGQTLPHIVLQFETE<br>YVVESTLSISEDLLSTK<br>YKDRLEASYGGLYDV<br>FTAILRGLSGAKLTRP<br>GKFRSCQDGYAVKSS<br>LKAEDGILYPLEKSSFF<br>LPKPPTLHDEIECLE<br>FERHGAGGSSISSHYF<br>DLLVRLKNEQEHLFR<br>NIQRNEYHNLFEFINS<br>KGLKITNLGETQATG |
| XP_006842123.1 | AtrSSRP1  | A. trichopoda | SSRP1 |                                                                                                                                                                                                                                                                                                                                                                                                                                                                                                                                                            |
|                |           |               |       | GHLAFGTLKLTKESLN<br>FKGDKGKSVNVVTS<br>DIDKLKWKLGKNP<br>GLRVGLNDGGAHRF<br>GGFKDLDLEKIQSFTS<br>SNWSQSIDQSNLFK<br>GWNYYQAEVKGKTV<br>EFSWEDKPIFEIPCTN<br>VSNVIANKNNEAVLEF<br>HQNDDSKVQLMEM<br>RFHMPIDLENEEDAD<br>KVEEFKAVLAYAGLE<br>AETEQPICLLTDILCTT<br>PRGRYDIKVYPTSIAL<br>HGKTYDYKIPKINRL<br>FLVPHKDGRRHVYFVL<br>SLNPPIRQGQTRYSYL<br>IIEFFGKDEEQDLELAL<br>TDEQLESSNGNLRRD<br>MTGPİYETISILFKSIC<br>NLKITVPGRFLGSSGT<br>PAIQCTHRQNPGLLY<br>PMEKGFLLHKKPAMY<br>IRFEISSCHFARSDSG<br>TVTRTFDFEIDLKYG<br>PLTFNAMEKEENNKL<br>FDYLNKKNIKIRNSQR<br>VENTVADSSDDEIDP   |
| NP_498633.1    | CeSSRP1-A | C. elegans    | SSRP1 |                                                                                                                                                                                                                                                                                                                                                                                                                                                                                                                                                            |

|             |           |              |       |                                                                                                                                                                                                                                                                                                                                                                                                                                                                                                                                                                |
|-------------|-----------|--------------|-------|----------------------------------------------------------------------------------------------------------------------------------------------------------------------------------------------------------------------------------------------------------------------------------------------------------------------------------------------------------------------------------------------------------------------------------------------------------------------------------------------------------------------------------------------------------------|
| NP_491688.1 | CeSSRP1-B | C. elegans   | SSRP1 | HLTCTGLTLTENSINFI<br>GDKGGKSVITGTDV<br>DKLKWQKLGNKPGL<br>RVGLSDGGAHRFGG<br>FLDDDLQKISFTSSN<br>WSKSINQSNLFINGW<br>NYGQADVKGKNEFS<br>WENEPIFEIPCTNVSN<br>VIANKNEAILEFHQNE<br>QSKVQLMEMRFHM<br>PVDLENEEDTDKVEE<br>FKKAVLAYAGLEAETE<br>QPICLLTDILCTTPRGR<br>YDIKVYPTSIALHGKT<br>YDYKIPVTINRFLVLP<br>HKDGRQVYFVLSLNP<br>PIRQQQTHYSYLIFE<br>GKDEEEDLESLTDEQ<br>LDYFNGNLQREMTG<br>PIYETISILFKSICNLKV<br>TVPGRFLGSSGTPAIQ<br>CTHRQNLGLLYPMEK<br>GFLFIQKPMYIRFEEI<br>SSCHFARSDSGTVTR<br>TFDIEDLKTGSSLTFS<br>AMDKEENNKLFDYL<br>NKKEIKIRNSHRIDNK<br>SAGYSSDEDDIDDPY       |
| XP_635805.1 | DdSSRP1   | D. discoideu | SSRP1 | LGGRISGTRGILKFTT<br>NNITWKESENGKIETV<br>SSSDIKRANWARVTP<br>RIFQLILSIKGGATVKF<br>DGFKEQDYEVVRKYL<br>SDQYNVSPLEIIELSSK<br>GCNWGEVKVNGPMP<br>IQFTTDHGKVGFEFPI<br>SEVSQSVIGANNKNE<br>LTLEFHHDKAMDDE<br>DETMVEMRFFTPIRP<br>SKEGEEGGKEKKVGE<br>DGEDEDEDEDAEKE<br>EEISALEQFQQTIMN<br>KSDMVSNVSKSLVVF<br>SAIQFLTPRGRIDIEM<br>YPTFLKLHGKTHDYKV<br>PYESISRLQFFRPDQ<br>KHIFFISLDPPIRQGO<br>TKYAHLVIQFQAEENI<br>HLELNLDELQKQFK<br>DQLSPIMNGNANALI<br>CKILKALTGKKITIPGN<br>FQSDSGANSIKCSLKA<br>NEGLYPLERCFFFVH<br>KPPTYIKFEDISNIEFA<br>RYGAPSVRGGSNRTF<br>DLSINLKNSTSIQFVNI |
| NP_523830.2 | DmSSRP1   | D. melanog   | SSRP1 | GVLCSGRLKMTQNI<br>IFKNTKTGKVEQISAE<br>DIDLINSQKFVGTWG<br>LRVFTKGGVLHRTG<br>FRDSEHEKLGKFIKAA<br>YSQEMVEKEMCVKG<br>WNWGTARFMGSVL<br>SFDKESKTIFEVPLSHV<br>SQCVTGKNEVTLEFH<br>QNDDAPVGLLEMRF<br>HIPAVESAEDPVDKF<br>HQNVMSKASVISASG<br>ESIAIFREIQLTPRGRY<br>DIKIFSTFFQLHGKTF<br>DYKIPMDSVLRFLML<br>PHKDSRQMFVLSLD<br>PPIKQGQTRYHYLVLL<br>FAPDEETTIELPSEAE<br>LRDKYEGKLEKESGP<br>VYEVMGKVMKVLIG<br>RKITGPGNFIGHSGT<br>AAVGCSFKAAGYLY<br>PLERGFYIHKPPLHIR<br>FEEISSVNFARSGGST<br>RSFDFEVTLKNGTVHI<br>FSSIEKEEYAKLFDYIT<br>QKKLHVSNMGKDKS<br>GYKDVDFGSDNEN             |

|             |          |            |       |                                                                                                                                                                                                                                                                                                                                                                                                                                                                                                                                                       |
|-------------|----------|------------|-------|-------------------------------------------------------------------------------------------------------------------------------------------------------------------------------------------------------------------------------------------------------------------------------------------------------------------------------------------------------------------------------------------------------------------------------------------------------------------------------------------------------------------------------------------------------|
|             |          |            |       | GSWNDGRLRFSKQT<br>VVYKSHKTGKVDSP<br>APDLSEAWRRVCL<br>GHGLKATSTGHIYKY<br>DGFKETDYEKISAFFK<br>ANYKVELEEDKMCVK<br>GWNWGTAKFAGSLL<br>SFDVSDSPVFEIPLSSV<br>SQCATGKNEVTVEFH<br>QNDDAEVSLMEVRF<br>YVPPNTGDDGSDPVE<br>AFAQNILSKADVIQA<br>TGDAVCIFKELQCLTP<br>RGRYDIRIYPTFLHLH<br>GKTFDYKIPYTTVLRLF<br>LLPHKDQRQMFFVIS<br>LDPPIKQGQTRYHFLI<br>LLFSKDEDISLALNMS<br>EDEVEKRYEGKLSKN<br>MSGPLYEIVSRVMKA<br>LVNRKITVPGNFQGH<br>SGSQCITCAYKASSGL<br>LYPLERGFYVHKPPV<br>HLRFEEISCNVFARGT<br>TTTRSDFEIEKQNN<br>QFTFSNIREEYGKLF<br>DFVNAKLTIKNRGF<br>KEGMKGAEYDSDSD    |
| A0A2R8QK93  | DrSSRP1A | D. rerio   | SSRP1 |                                                                                                                                                                                                                                                                                                                                                                                                                                                                                                                                                       |
|             |          |            |       | GSWNDGRLRFSKQT<br>VVYKNSKTGKVDTP<br>VPELTQAQWRRVCL<br>GHGKLTSTGHIYK<br>YDGFKDADLEKISEYF<br>KDNVYKELTEKDMCV<br>KGWNWGTAKFNGP<br>LLSFDVNDSPTEIPLS<br>SVSQCTTGKNEVTVE<br>FHQNDDEVSLEMEV<br>RFYVPPTTGDEGSDP<br>VEAFAQNVLSKADVI<br>QATGDAVCIFRELQC<br>LTPRGRYDIRIYPTFLH<br>LHGKTFDYKIPYTTVL<br>RLFLPHKDQRQMFF<br>VISLDPPIKQGQTRYH<br>FLILLFSKEETISLTLM<br>NEDEVERRFEGKLNK<br>NMSGSLYEMVSRVM<br>KALVNRKITVPGNFQ<br>GHSGAQCTCSYKAS<br>SGLLYPLERGFYVHK<br>PPVHLRFEEIACVNFA<br>RGTTTTRSDFEIEK<br>QGNQYTFSSIEREEYG<br>KLDFDFVNAKLSIKNR<br>GFKEGMKGNDMDMY        |
| A0A2R8QBX6  | DRSSRP1B | D. rerio   | SSRP1 |                                                                                                                                                                                                                                                                                                                                                                                                                                                                                                                                                       |
|             |          |            |       | GSMNDGRLRLSRQGI<br>IFKNSKTGKVDNIQA<br>GELTEGIWRRVALGH<br>GLKLLTKNGHVYKYD<br>GFRSEFEKLSDFEKT<br>HYRLELMKEDLCVKG<br>WNNWGTVKFGGQLLS<br>FDIGDQPVFEIPLSNV<br>SQCTTGKNEVTLEFH<br>QNDDAEVSLMEVRF<br>YVPPTQEDGVDPVEA<br>FAQNVLSKADVIQAT<br>GDAICIFRELQCLTPR<br>GRYDIRIYPTFLHLHG<br>KTFDYKIPYTTVLRLFL<br>LPHKDQRQMFFVISL<br>DPPIKQGQTRYHFLIL<br>LFSKDEDISLTLMNE<br>EEVEKRFEGRLTKNM<br>SGSLYEMVSRVMKAL<br>VNRKITVPGNFQGH<br>GAQCITCSYKASSGLL<br>YPLERGFYVHKPPVH<br>IRFDEISFVNFARGTT<br>TTTRSDFEIEKQGTQ<br>YTFSSIEREEYKLFDF<br>VNAKLNKIKRGLKE<br>GMNPSYDEYADSDE |
| NP_003137.1 | HsSSRP1  | H. sapiens | SSRP1 |                                                                                                                                                                                                                                                                                                                                                                                                                                                                                                                                                       |

|                |          |                |       |                                                                                                                                                                                                                                                                                                                                                                                                                                                                                                                                                         |
|----------------|----------|----------------|-------|---------------------------------------------------------------------------------------------------------------------------------------------------------------------------------------------------------------------------------------------------------------------------------------------------------------------------------------------------------------------------------------------------------------------------------------------------------------------------------------------------------------------------------------------------------|
|                |          |                |       | GSMNDGRLRLSRQGI<br>IFKNSKTGKVDNIQA<br>GELTEGIWRRVALGH<br>GLKLLTKNGHVYKYD<br>GFRESEFEKLSDFFKT<br>HYRLELMEKDLCKVG<br>WNWGTVKFGGQLLS<br>FDIGDQPVFEIPLSNV<br>SQCTTGKNEVTLEFH<br>QNDDAEVSLMEVRF<br>YVPTQEDGVDPVEA<br>FAQNVLSKADVIQAT<br>GDAICIFRELQCLTPR<br>GRYDIRIYPTFLHLHG<br>KTFDYKIPYTTVLRFL<br>LPHKDQRMFFVISL<br>DPPIKQGQTRYHFLIL<br>LFSKDEDISLTNNMNE<br>EEVEKRFEGRLTKNM<br>SGSLYEMVSRVMKAL<br>VNRKITVPGNFQGH<br>GAQCITCSYKASSGLL<br>YPLERGFYVHKPPVH<br>IRFDEISFVNFARGTT<br>TTRSFDFEIEKQGTQ<br>YTFSSIEREEYKLFDF<br>VNAKKLNKRNGLKE<br>GINPGYDDYADSD      |
| NP_001129553.1 | MmSSRP1  | M. musculus    | SSRP1 | GRGGTNPQGLKINS<br>GFQWRKAGGKVVVE<br>VSTSDIASLWTRVPK<br>GFQLGVKLKAGRDVK<br>FNGFRESDMANLSF<br>FTTNMGITSEEKPLAI<br>SGRNWGDVTLEGSSL<br>AFSVGGKHAFDVSA<br>DVSQTQMQGKNEV<br>MLEFHVDDTTGASEK<br>DTLMELSFHIPTNTT<br>YIGDEERPPAQIFREKI<br>LSMGDVGPSGAEAIA<br>LFEEVHILTPRGYNV<br>ELHASFLRLQGQAND<br>FKIQYSSVRLFILPKS<br>NQPHTFVVITLDPPIR<br>KGQTFYPHIVLQFPSE<br>EIAECTLSIGEELLNTK<br>YKDRLQPAYKDLSDH<br>VFTQILKGLSGAKVTR<br>PGKFRSAQDGYCVRT<br>SLKAEEGTLYPLEKSFF<br>FLPKPPTLULHDEIEYLE<br>FERHGAAGTSSISSHY<br>FDLIRLKSEQEHQFR<br>NIQRNEYHNLNFI<br>KNLKIMNLGDAQGTS |
| A0A2K1K1Z7     | PpaSSRP1 | P. patens      | SSRP1 | GRVSSTKGVKVNST<br>MFLWRTEAGRVISVL<br>PTDLSQAFWTRIYGR<br>VFQLKLQNLIGNSIKF<br>DGFRESDDVLKTFLS<br>ENFHVELTTVQLATK<br>GLNWGEYELAGPVIT<br>LAVDGKHAFIPVSEI<br>SGAVMQPTQKNEVA<br>IEFHQDSTLEDEDESL<br>VDIRFFIPNRSTEEGS<br>KTSAILHKGLLDVIG<br>GGIQKDRATLNKV<br>PILTPRGYDIELYPTF<br>MKFRGKTHDYKVITYE<br>SVSRLQLPKPDQHII<br>FFIVTLDPPIRQGTMR<br>YPHLVMHFKMDEKS<br>PPVPITLPADLKEKEQ<br>FKSLPEEFKDADAYEV<br>VNKLFRFTQRIKTP<br>GSFKSHSGASAVKCA<br>FKANDGFLFLERSFF<br>FVHKPPLHMRFEVS<br>SVEFARVASSTNAQA<br>NRTFDLVIRLSDSTVH<br>QFTGIQRNEYGSLFN<br>FIQSKLRIENPDEAT      |
| -              | PpPO3    | P. polycephala | SSRP1 |                                                                                                                                                                                                                                                                                                                                                                                                                                                                                                                                                         |



|                |         |                 |       |                                                                                                                                                                                                                                                                                                                                                                                                                                                                                                                                                     |
|----------------|---------|-----------------|-------|-----------------------------------------------------------------------------------------------------------------------------------------------------------------------------------------------------------------------------------------------------------------------------------------------------------------------------------------------------------------------------------------------------------------------------------------------------------------------------------------------------------------------------------------------------|
| NP_013642.1    | ScPOB3  | S. cerevisiae   | SSRP1 | SGRFRIADSGLGWKIS<br>TSGGSAANQARKPFL<br>LPATELSTVQWSRGC<br>RGYDLKINTKNQGV<br>QLDGFSDQDDYNLKN<br>DFHRRFNQVEQREH<br>SLRGWNNWGKTDLAR<br>NEMVFALNGKPTFEI<br>PYARINNTNLTSKNE<br>VGIEFNQDEEYQPA<br>GDELVEMRFVPGVI<br>QTNVDENMTKKEESS<br>NEVVPKEDGAEGED<br>VQMAVEEKSMAEAF<br>YEELKEADIGEAGD<br>AIVSFQDVFFTTPRGR<br>YDIDIYKNSIRLRGKTY<br>EYKLQHRQIQRVSLP<br>KADDIHLLVLAIEPP<br>LRQGQTTYPFLVLQF<br>QKDEETEVLNLEDE<br>DYEENYKDLKKQYD<br>AKTHVLSHLKGLTD<br>RRVIVPGEYKSKYDQ<br>CAVSCSFKANEGYLY<br>PLDNAFFFLTKPTLYIP<br>FSDVSMVNISRAGQT<br>STSSRTFDEVLVLRSN       |
| XP_001014803.2 | TtSSRP1 | T. thermophilus | SSRP1 | VTFFEDQLVLSHNKR<br>RLCKLSLKKFTNSTVN<br>KTDIVIDLNTVDLQDD<br>EDQLCEMRLFIPQQQ<br>DAQMKPEDDGESEE<br>KEGEDSVGGYADQL<br>NSEIITKAKIGQYSGQ<br>SIVKFEDISLLVPRGKY<br>QLDMYKTVRFHGSS<br>FNVIVEYSNVKGFLLP<br>QPDEVHVAFLGLD<br>QPLKIGNTVHSYIVM<br>QFKKEQKANKVNI<br>PEEKEDKLDLDEEY<br>DGFLYIAGQLFKTLC<br>NNVQIIMPAGFQSSD<br>KQNCCLKCTLKTHQGL<br>LYPMRKSIFIKPVIH<br>IQISDIQKVEFNVRGN<br>ATLNKLFVVKVFTKTT<br>TPQFFGFERKELDVLL<br>EYFKSNKITYDDTN<br>QGATFDDDEEFTDSI<br>SEDEEEGKRAQRKSA<br>KRANKAVKGQSGPLPL<br>DDDEDEEDEFDADE<br>FESEDEEEEEEDEDED<br>EDFEQ            |
| NP_001084164.1 | XlSSRP1 | X. laevis       | SSRP1 | GSMNDGRLRLSRAG<br>LMYKNNKTGKVENIS<br>AADIAEVVWRRVAL<br>GHGIKLLTNGGHVYK<br>YDGFRETEYDKLFDYF<br>KSHFSVELVEKDLCKV<br>GWNWGSVRFGGQL<br>LSFDIGDQPAFELPLS<br>NVSQCTTGKNEVTLE<br>FHQNDDEVSLEIR<br>FYVPPTQDDGGSVE<br>AFAQNVLSKADVIA<br>TGDAVCIFRELQCLTP<br>RGRYDIRIYPTFLHLH<br>GKTFDYKIPYTTVLRLF<br>LLPHKDQRQMFFVIS<br>LDPPIKQGQTRYHFLI<br>LLFSKDEDMTLTLNM<br>SEEEVERRFEGKLKKS<br>MSGCLYEMVSRVMK<br>ALVNRKITVPGNFLG<br>HSGSQCITCSYKASSG<br>LLYPLERGIYVHKPP<br>VHIRFDEITCVNFARG<br>TTTTRSFDEIETKQG<br>SQYTFSSIEREEYGKLF<br>DFVNAKLSIKNRGLK<br>EGMKPAYDDYADSD |

|             |         |                |       |                                                                                                                                                                                                                                                                                                                                                                                                                                                                                                      |
|-------------|---------|----------------|-------|------------------------------------------------------------------------------------------------------------------------------------------------------------------------------------------------------------------------------------------------------------------------------------------------------------------------------------------------------------------------------------------------------------------------------------------------------------------------------------------------------|
| Q9LEF5      | ZmSSRP1 | Z. mays        | SSRP1 | RGGTNPQGQFKVHSG<br>GLAWKRQGGGKTIET<br>DKADVTAVTWMKVP<br>RAY<br>QLGVRIKAGLFYRFIG<br>FREQDVSNLTNFIQK<br>NMGVTPDEKQLSVS<br>GQNWGGIDIDGNM<br>LT<br>FMVGSKQAFEVSLPD<br>VAQTQMQGKTDVLL<br>ELHVDDTTGANEDKS<br>LMDLSFHVPTSNTQF<br>V<br>GDESPPPAHILWETIL<br>KFADVGSSEEPVVTFE<br>GIAILTPRGYSVELHL<br>SFLRLQGQAND<br>FKIQYSSIVRLFLPKS<br>NNPHTFVVITLDPPIR<br>KGQTLYPHIVIQFETE<br>AVVERDLALSK<br>ELLVEKYKDRLEESYK<br>GLIHEVFTKVLRLSG<br>AKVTRPGSFRSCQDG<br>YAVKSSLKAEDGL<br>LYPLEKGFFFLPKPPTL<br>ILHEIEFVEFERHGA |
| NP_015377.1 | ScNHP6A | S. cerevisiae  | NHP6  | MVTPREPKRTRKK<br>KDPNAPKRALSAYMF<br>FANENRDIVRSENPI<br>TFGQVGGKLGKWK<br>ALTPEEKQPYEAKAQ<br>ADKKRYESEKELYNAT<br>LA                                                                                                                                                                                                                                                                                                                                                                                    |
| NP_009647.2 | ScNHP6B | S. cerevisiae  | NHP6  | MAATKEAKQPEPK<br>KRTTRRKDPNAPKR<br>GLSAYMFFANENRDI<br>VRSENPDVTFGQVG<br>RILGERWKALTAEK<br>QPYESKAQADKKRYE<br>SEKELYNATRA                                                                                                                                                                                                                                                                                                                                                                             |
| -           | PpNHP6A | P. polycephala | NHP6  | MEGESQAPEDMVNE<br>EEVKDTGKKKGKKA<br>VKQLVKPAKAKEDK<br>KKVDKEDKKKDAK<br>DDKQKKKEEEAESEE<br>QESDKKEEQEEDGA<br>ETKAKDKTTAKGKVG<br>AKKATTESKPKKEKA<br>GKDKDKDKTEKKV<br>KDPNAPKRQATAYLIF<br>ANEQRETIKKDNPSFS<br>PPDILKEAGARWKAL<br>TDKEKRYQDKNEIEK<br>HRYKEMEAYNANG<br>GEKDTDKKGAKRKKG<br>EEEEEEDEENAKPNK<br>KAAAADKGKGPKG<br>LLAKAGAKKK                                                                                                                                                                  |
| -           | PpNHP6B | P. polycephala | NHP6  | MDTPKECPAKEDAP<br>AEKTEQPAPEKKEAE<br>KEEGKEGKDEEKDVK<br>VSESEETLKQEPKRA<br>RSAYAIFTAEQVPMV<br>KKEHPDMSRTEITCI<br>AAKWKAMTAEQKQ<br>PFEEQAVNEKKRIKEA<br>KEAAAEAKDKEAEK<br>PAESEVRYSLRNSTVI<br>KDGEELVNTKKRALE<br>TEEDSANKKKCVTSEE                                                                                                                                                                                                                                                                      |
| -           | PpNHP6C | P. polycephala | NHP6  | MITLHECLKTLLADTE<br>NVTLDTEAELLYNFV<br>SFISTRGTGKNKENTY<br>PTPISSETSSQNEDDS<br>DEEPTRTKTGTPIKRK<br>KDPNAPKRPLTAFML<br>YAHDKRAEIKAQNP<br>MTFGALGKLGKGTW<br>LTFDATQKKVYSOMA<br>DKAKLTYEKELAEYTK<br>NKQT                                                                                                                                                                                                                                                                                                |
| -           | PpNHP6D | P. polycephala | NHP6  | MSSDEESASSASEVEE<br>VEEKKRGPKKGAKK<br>AEKTKKATKKVAKKK<br>KDPNAPKRPLSAFMY<br>YSQQRPNVKKENPS<br>ATFADVARIERGEQWK<br>ALDASLKEYEKQAA<br>TDKARWEKEKAAYD<br>GGSSKGKKKAAAGS<br>DDEEEESGSDE                                                                                                                                                                                                                                                                                                                  |

|                |          |              |            |                                                                                                                                                                                                                                                                                                                                                                                                                                                                                                                                                     |
|----------------|----------|--------------|------------|-----------------------------------------------------------------------------------------------------------------------------------------------------------------------------------------------------------------------------------------------------------------------------------------------------------------------------------------------------------------------------------------------------------------------------------------------------------------------------------------------------------------------------------------------------|
| -              | PpNHP6E  | P. polycepha | NHP6       | MVRFPSYFGPQDFEF<br>QKGRARPYFKRKRL<br>LSRCPLVFQTRTHS<br>QHSQEHKMVAKKEK<br>KEAVEGERKSSRTSK<br>QVERLSVSPPTILKKK<br>ATKSTTASKTSPKK<br>AGAKKGTKKAKGEK<br>GPKRPASAYLLFANE<br>NRAKVKKANPDATF<br>GELGKLLGEAWSNAT<br>AADKKKFTALADKDK<br>ARYEKEKAALA                                                                                                                                                                                                                                                                                                          |
| NP_001031485.1 | AtNAP1   | A thaliana   | NAP family | MSPTSVRSREWEGPS<br>RWTEYLGPEMAASV<br>SSTRSSKQIDGHVGG<br>STKALNIQWVVMIE<br>VADGLMAKMYRLN<br>QILEYDPVGHVFSEA<br>FWKAGVFPNHPRICT<br>LLSKKFPEHFSKLQLE<br>RIDKFSLDSLHDGAEL<br>HLQSLEPWQLLLDL<br>MAFREQALRULDLSS<br>TVITLLPHQNSLILHAF<br>MDLFCAFVRVNLFAE<br>KIPRKMLLQVYNLLH<br>ALSRNDRDCDFYHRL<br>VQFIDSYPPLKGLQE<br>DLNFVSPRIGEVLEAV<br>GPSIFLSADTRKLRNE<br>GFLSPYHPRFPDILT<br>SAHPMRAQDLANVT<br>SYREWVLLGYLVCPD<br>ELLRVTSIDIALVVLKE<br>NLVVTLFRDEVSLYQ<br>MVCEKEFGIGISFASA<br>DSINLTMQYILLHEDY<br>QLYVLPVLESKKMA<br>KSGRTKQKEADLEYS<br>VAKQVEKMISEVHEQ |
| NP_194341.1    | AtNAP1;1 | A thaliana   | NAP family | MSNDKDSFNVSOLD<br>AALKDEDAGLVNAL<br>KNKLQNLQAGQSDVL<br>ENLTPNVRKRVDALR<br>DIQSQHDELEAKFREE<br>RAILEAKYQTLYQPLY<br>VKRYEIVNGTTEVELA<br>PEDDTKVDQGEETA<br>EEKGVPSFWLTALKN<br>NDVISEEVTREDEGAL<br>KYLKDIKWCKIEEPKG<br>FKLEFFFDTPNYFKNT<br>VLTKSYHMIDEPELL<br>EKAMGTEIDWYPGK<br>CLTKILKPKKKGSK<br>NTKPITKLEDCESFFN<br>FFSPPEVPDEDEDIDE<br>ERAEDLQNLMEQDY<br>DIGSTIREKIIPRAVSW<br>FTGEAMEAEDEIDD<br>DEEDDIDEDEDEEED<br>DEEDDDDEDEEESKT<br>KKKPSIGNKKGGRSQJ<br>VGEGKQDERPPECK<br>QQ                                                                       |
| NP_001319544.1 | AtNAP1;4 | A thaliana   | NAP family | MSNEENIKSDNKS<br>SSDLPTIPALDIGAEEC<br>DLAELKNLTKRPF<br>VKKLSPKVTRKVLFLK<br>DIQVTHDELEEF<br>KSALEATYDNLKPLF<br>AKRYEIVNGVVEAEA<br>EKEGVPNFWLIAMKT<br>NEMLANEITERDEAA<br>LKYLKDIRSCRVEDTS<br>RNFKLEFLFDSNLYFK<br>NSVLKTYHVNDEG<br>PVLEKVIKTDIEWFPG<br>KCLTHKVVVKKTKK<br>GPKKVNNIPMTKTEN<br>CESFFNFKPPEIPEID<br>EVDDYDDFDITMTEE<br>LQNLMDQDYDIAVTI<br>RDKLIPHAVSWFTGE<br>ALVDEDDSDNDND<br>DNDEKSD                                                                                                                                                      |

|                |              |               |            |                                                                                                                                                                                                                                                                                                                                                                                                                                                                 |
|----------------|--------------|---------------|------------|-----------------------------------------------------------------------------------------------------------------------------------------------------------------------------------------------------------------------------------------------------------------------------------------------------------------------------------------------------------------------------------------------------------------------------------------------------------------|
|                |              |               |            | MVADKSKKSKIEEG<br>EEENLEQIDAEVLV<br>KLQEIQDDLEKINE<br>SDEVLEVEQKYNVIR<br>PVYDKRNEVIQSI<br>WMTAFLSHPALGDL<br>TEEDQKIFKYLNSLE<br>EDAKDVKSGYSITFH<br>TSNPFEDAKLTKTFT<br>FLEEGTTKITATPIKW<br>KEGKGLPNGVNHDD<br>KKGKRALPEESFFT<br>WFTDAQHKEDAGDE<br>IHDEVADIKEDLWSN<br>PLTYFNDADEEDFD<br>GDDDGDEEGEDDD<br>DEEEEDGEE                                                                                                                                                  |
| NP_001077822.1 | AtNRP1       | A thaliana    | NAP family |                                                                                                                                                                                                                                                                                                                                                                                                                                                                 |
|                |              |               |            | MVTDKSKKAKTEEN<br>VEQIDAEVLVLSIE<br>IQDDLEKINEKASDEV<br>LEVEQKYNVIRKPVYD<br>KRNEIITIPDFWLTA<br>FLSHPALGELLTEEDQ<br>KIFKYLSSLDVEDAKD<br>VKSGYSITFSFNP<br>FEDGKLTKTFTFLEEG<br>TTKITATPIKWKEGKG<br>LANGVNHKNGNKR<br>ALPEESFFTWFSDAQ<br>HKEDVEDEMQDEVA<br>DIIKEDLWPNPLTYFN<br>NDADEEDFGDDDG<br>DEEEKEGDSDEDDDE<br>EDEVGEE                                                                                                                                           |
| NP_564063.1    | AtNRP2       | A thaliana    | NAP family |                                                                                                                                                                                                                                                                                                                                                                                                                                                                 |
|                |              |               |            | MVEKGKSKAQPVE<br>DDVSDHIDGELVLSIE<br>KLQEIQDELEKVN<br>SDKVLEVEQKYNEIRR<br>PVYGRRNEIQTIPDF<br>WLTAFLSHPALCDLLS<br>EEDQKIFKYLHSLDVE<br>DSKDIKSGYTITFNFN<br>TNPYFEDAKLIKLTFS<br>DDGSTKVTGTTIKWK<br>EGMDVSNGINHGKE<br>GKKRPFSEGSFFTWF<br>SETDQQKDFTEGLQD<br>EVAEIIKEDLWPNPLK<br>YFNNEAEGDFDEDD<br>DDDENEDDEGESEDS<br>SDEEGEDDS                                                                                                                                      |
| XP_006836211.1 | AtrNRP2A     | A. trichopoda | NAP family |                                                                                                                                                                                                                                                                                                                                                                                                                                                                 |
|                |              |               |            | MVLSKGGKAKVSAPE<br>EEGLEHIDGELVLSIE<br>RLQEIQDELEKVN<br>SDKVLEVEQKYNEIRR<br>PVYNKRKEIQTIPDF<br>WLTAQSHPALGELL<br>TEEDEKVFYQLQSLDV<br>QDFKDVKSGYSIAFN<br>FSTNPYFENTKLTKTIS<br>FSDEGTSKITGTTIKW<br>KDGMEPMNGVDHK<br>KKGKRAFTEESFES<br>WFSDNRQNGGLSES<br>EDESIVCDEVAEIIKED<br>LWPNPLKYFNNDAD<br>EEEMDEEEEEDEDD<br>DALGKNENGSDDDD<br>SDDDEQDGDDEDEA                                                                                                                 |
| XP_006827206.1 | AtrNRP2B     | A. trichopoda | NAP family |                                                                                                                                                                                                                                                                                                                                                                                                                                                                 |
|                |              |               |            | MLDLPVYILFHKSLPR<br>WFMSEYDALEAKFFE<br>ERAALEAKYQKQYEP<br>LYTKRFEIVNGVVEVD<br>SVKNDTTEETAADDN<br>AKGVPDFWLTAMKT<br>NEVLAGEIYERDEGAL<br>KYLKDIKWCKIEDPKG<br>FKLEFFFDTNPFKNS<br>VLTKTYHVEEDDEPLL<br>EKAIGTEIEWYPGKCL<br>TQKVLKKPKKGVKN<br>AKPITKTEPCESFFNFF<br>KPPQVPEDDADIDED<br>TAEELQNLMEQDYDI<br>GTTIRDKIIPHAVSWF<br>TGEAIDGEEFEGETG<br>DEEDDDDDDEDGDD<br>DEDEEDDDVEDEDD<br>DDEDEEEGSKKSG<br>VVRLKVRLLLSFSLFPP<br>SRMQFTDIRLFFGV<br>QKAGSRQNGDQGD<br>RPAECKQQ |
| XP_020520079.1 | AtrNAP1;4-X4 | A. trichopoda | NAP family |                                                                                                                                                                                                                                                                                                                                                                                                                                                                 |

|                |           |               |            |                                                                                                                                                                                                                                                                                                                                                                                                                                                                                                  |
|----------------|-----------|---------------|------------|--------------------------------------------------------------------------------------------------------------------------------------------------------------------------------------------------------------------------------------------------------------------------------------------------------------------------------------------------------------------------------------------------------------------------------------------------------------------------------------------------|
| XP_011620892.1 | AtrNAP1;4 | A. trichopoda | NAP family | MSKQNDQLSPYNM<br>ADLGSALPGAAALSA<br>EDRAGLVNALKNKLQ<br>HLAGQHSDVLESLS<br>KVKKRVVVLQEIQSQ<br>HDELEAKFFEERAAL<br>AKYQKLYDPLYTKRYE<br>IVNGIVEVDSVENEEA<br>SEKTPRDDTDNNEEK<br>GVPDFWLTAMKTNE<br>VLSGEIYERDEEALKYL<br>RDIKWCRIDNPKGFK<br>LEFFFDPNPYFKNSVL<br>TKTYHMIDDEPILER<br>AIGTDIEWYPGKSLT<br>QKVLKKPKKGSKNA<br>KPIKTEDCESFFNFFS<br>PPQVPEDDEDIDEET<br>AEQLQNLMEQDYDI<br>GSTIRDKIIPHAVSWF<br>TGEAVQGDEFEDMD<br>EEDDEDGDEGDGDD<br>EEEEEEDEDEDED<br>DEEEERGSRKKPVA<br>AGHKIAGGVVGE<br>QGGERPPECKQQ |
| NP_501422.1    | CeNAP1    | C. elegans    | NAP family | MADQEHIDAGLLSTN<br>FDMIQALPLNVKQRV<br>CALKNLQMKTIQIES<br>DFYKRVHELEIEFEGK<br>FKSTFDQRKAIVAGE<br>VEPTKEQIDTPILEGLE<br>GDQLAELYKAAEADP<br>SAKGKDFWLTALRT<br>HDLVAEAEIEHDVPIL<br>SYLTDVTTAASKDPA<br>GFKIEFHATNPYFKN<br>QVLTKTLLGFDPAE<br>APLQFDGPHVIRAVG<br>DTIEWEDGKNVTKKA<br>VKKKQKKGANAGKFL<br>TKTVKADSFNFFPP<br>KSKDERNEDEDEQA<br>EEFLELDYEMGQAIR<br>DTIIPRAVLFTYGELQS<br>DDMFDFPGEDGDDV<br>SDFSDEA                                                                                             |
| NP_001021332.1 | CeSPR-2A  | C. elegans    | NAP family | MSEEPAAKRMKNAD<br>EFPNLRSEVAGPVKE<br>KLIELDAIQHQLDVM<br>SENAAEVLKVEQIFN<br>QKRLPIYEKRKLTTKI<br>DNFWQTAFLNHHLL<br>STAIPPEEQEDLLAAL<br>DLEVQEFEDLRSGFKII<br>MTFDPNEYFTNEVIT<br>KSYHLQSESPSTEITEI<br>EWKENKKPPFPEDG<br>DSAHTFLEWLTYAAL<br>PDSDEIAEVIKDDLTV<br>NPLQYYVMPDMQEV<br>EEDDIEDFLNEERGVD<br>ENGQRIIPRNISDSLK<br>VDQDESADGQEGED<br>EEEEDMGEEEDGVE<br>EEAEGEEEEEGAIEE<br>EGGDENVEAHVAVN<br>PENTAE                                                                                             |
| NP_001021333.1 | CeSPR-2B  | C. elegans    | NAP family | MSEEPAAKRMKNAD<br>EFPNLRSEVAGPVKE<br>KLIELDAIQHQLDVM<br>SENAAEVLKVEQIFN<br>QKRLPIYEKRKLTTKI<br>DNFWQTAFLNHHLL<br>STAIPPEEQEDLLAAL<br>DLEVQEFEDLRSGFKII<br>MTFDPNEYFTNEVIT<br>KSYHLQSESPSTEITEI<br>EWKENKKPPFPEDG<br>DSAHTFLEWLTYAAL<br>PDSDEIAEVIKDDLTV<br>NPLQYYVMPDMQEV<br>EEDDIEDFLNEERGVD<br>ENGQRIIPRNISDSLK<br>VDQDESADGQEGED<br>EEEEDMGEEEDGVE<br>EEAEGEEEEEGAIEE<br>EGGDENVEAHVAVN<br>PENTAE                                                                                             |

|             |           |          |            |                                                                                                                                                                                                                                                                                                                                                                                                                                                                                                                                  |
|-------------|-----------|----------|------------|----------------------------------------------------------------------------------------------------------------------------------------------------------------------------------------------------------------------------------------------------------------------------------------------------------------------------------------------------------------------------------------------------------------------------------------------------------------------------------------------------------------------------------|
| NP_958876.1 | DrSETB    | D. rerio | NAP family | MSASAAKVSKEQN<br>SNHDGADETSEKEQ<br>QEAIHIDEVQNEIDR<br>LNEQASEEILKVEQKY<br>NKLRQPFQKRSELIA<br>KIPNFWVTTFVNHPQ<br>VSALLGEEDEEALHYL<br>TRVEVTEFEDIKSGYRI<br>DFYFDENPYFENKVLS<br>KEFHNLNESGDPSSKST<br>EIKWKAGKDLTKRTG<br>QTPNKAGKKRQHEE<br>PESFFTWFTHSDAG<br>ADELGEVIKDDIWPN<br>PLQYYLVPDMDEEEG<br>EGEEEDDEEEEGLED<br>IDEEGEDDDGEEDEE<br>EDEGEDGEDDGEDD                                                                                                                                                                              |
| NP_958883.1 | DrSETA    | D. rerio | NAP family | MSASAAKVSKEKELNS<br>NHDGGDETSEKEQQ<br>EAIEHIDEVQNEIDRL<br>NEQASEEILKVEQKY<br>NKLRQPFQKRSELIA<br>KIPNFWVTTFVNHPQ<br>VSALLGEEDEEALHYL<br>TRVEVTEFEDIKSGYRI<br>DFYFDENMYFENKVL<br>SKEIHLNESGDPTSKS<br>TEIKWKPGKDLTSRSS<br>QTQSKAGKKRQHEE<br>PESFFTWFTHDADSG<br>ADELGEVIKDDIWPN<br>PLQYYLVPDMDEEEG<br>EGEDEDDEEGLDDI<br>DEEGDDDGEEEDDD<br>DGEDDEGD                                                                                                                                                                                   |
| AAH52128.1  | DrNAP1L1A | D. rerio | NAP family | HKALASLTGGDADD<br>DCKEMPCSSKKASRE<br>KSRDKSNRPGCSQSD<br>RRTEAAAADSSSL<br>CEDQEDPSFVDDDEE<br>EEEDDSLPGSSSTAS<br>SSVASDNEDNEDGEC<br>AIVSVKMAPEVRQSV<br>ALLAQVQMRLDALEK<br>KGARLHQRLEMKLSR<br>QRRPHLDQRSITQA<br>VPGFWVTALLNHPH<br>LSAHIDETDEDAISY<br>MTNLEVESFKNNKLG<br>YRICFHFRNPFFQN<br>KMIVKELHLMGGG<br>PVSFSNPILWHRGQN<br>LVGSGEPRTSQGVY<br>QSFFHWFSDHSNPG<br>RDDIAQLREDLYRNP<br>LRYLTPLWEPRENG<br>SSAPKPGSSNRDEC<br>VIISDSDEEEQNSQS<br>LGQEDDEDDQGGV<br>SEENERDEGDSCEE<br>RDEEEVDVEEVESH<br>DSGGCEAREQEEEDI<br>DVDEEKS         |
| NP_956349.1 | DrTSPY    | D. rerio | NAP family | RKRSASPSGECSTQL<br>KQAKVSVEEQKNP<br>QEDAEPKVGNGEPK<br>DGAEPSEGAKEEAKI<br>EDEVAAQESTGQAN<br>VSGGESARQPSDSAA<br>IAAAEALASLTGGDA<br>DDCKEMPCSSKKAS<br>REKSRDKSNRPGCSQ<br>SDRRTAAAAADSSSL<br>LLCEDQEDPSFVDD<br>EEEEEDSLPGSSST<br>ASSVASDNEDNEDG<br>ECAIVSVKMAPEVRQ<br>SVALLAQVQMRLDAL<br>EKKGARLHQRLEMKL<br>SRQRRPHLDQRSIT<br>QAVPGFWVTALLNH<br>PHLSAHIDETDEDAIS<br>YMTNLEIESFKNNKL<br>GYRICFHFRNPFFQ<br>NKMIVKELHLMGGG<br>SPVSFSNPILWHRGQ<br>NLVSGEPRTSQGV<br>YQSFFHWFSDHSNP<br>GRDDIAQLREDLYRN<br>PLRYLTPLWEPREN<br>GSSAPKPGSSNRDE |

|                |             |          |            |                                                                                                                                                                                                                                                                                                                                                                                                                                                                      |
|----------------|-------------|----------|------------|----------------------------------------------------------------------------------------------------------------------------------------------------------------------------------------------------------------------------------------------------------------------------------------------------------------------------------------------------------------------------------------------------------------------------------------------------------------------|
|                |             |          |            | MDKKNEKGARGKG<br>GTKPDKPEAFLQVER<br>VPYFNLLPKNVKRRV<br>YALKRLQLQSGNIEAK<br>FYEEVHELERYAGLY<br>QPILDKRREIVTGAVE<br>PTDEECEWHSKDKEED<br>ELADDLQKKALEEK<br>QADSASAVDPKGIPD<br>FWLTIFKHVDMLGE<br>MLQEHDPEILKHLQD<br>VTVKFSEPGQPMST<br>LEFHFEPNSYFSNTVL<br>TKVYKMKSEPDAAADP<br>FSFEGPEIVDCEGCKI<br>DWHKGKDVTVKIVK<br>KKQKHKGRTIRTVS<br>KEIPQDSFFNFFNPVK<br>ASPDGMDEDLDFTLA<br>TDFEIGHFRERVIPR<br>AVLYFTGEALEDDES<br>EEEELEEGEEEDLDEE<br>GEEEEEGDFDPTA                     |
| NP_001082816.1 | DrNAP1L4a   | D. rerio | NAP family |                                                                                                                                                                                                                                                                                                                                                                                                                                                                      |
|                |             |          |            | MEADNEAKGVSDQ<br>AMQNPQALALQDK<br>LDSVSHSASIMDSLPK<br>SVKRRVNALRNQLQVD<br>STHIEAKFYKEVHELE<br>RKYSALYQPLFDKRRK<br>VVSGEVEPTDEECEW<br>QSDHEDEAALAECLK<br>KKAIEEETEDANEK<br>PKGIPEFWLTIFRSVD<br>MLSDMLQEHDPEILK<br>HLHDIKVFSGPDQP<br>MSFTLEFHFEPNEYFT<br>NTVLTKVYKMKSEPD<br>ADDPFSFEGPEIIDCE<br>GCEIDWQKGKDVTV<br>KTIKKQKHKGRTVS<br>RVITKQVPNDSFFNFF<br>NPIKVSPDKELDEDESE<br>YTLATDFEIGHFRERI<br>VPRAVLYFTGEALED<br>DESFEEDLEDEGEED<br>QDDEEEEEEEEGDS<br>KTGDPQPAECRQQ |
| NP_001007454.1 | DrNAP1L4b   | D. rerio | NAP family |                                                                                                                                                                                                                                                                                                                                                                                                                                                                      |
|                |             |          |            | MDKKNEKGARGKG<br>GTKPDKPEAFLQVER<br>VPNFNLLPKNVKRRV<br>YALKRLQLQSGNIEAK<br>FYEEVHELERYAGLY<br>QPILDKRREIVTGAVE<br>PTDEECEWHSKDKEED<br>ELADDLQKKALEEK<br>QADSASAVDPKGIPD<br>FWLTIFKHVDMLGE<br>MLQEHDPEILKHLQD<br>VTVKFSEPGQPMST<br>LEFHFEPNSYFSNTVL<br>TKVYKMKSEPDAAADP<br>FSFEGPEIVDCEGCKI<br>DWHKGKDVTVKIVK<br>KKQKHKGRTIRTVS<br>KEIPQDSFFNFFNPVK<br>ASPDGMDEDLDFTLA<br>TDFEIGHFRERVIPR<br>AVLYFTGEALEDDES<br>EEEELEEGEEEDLDEE<br>GEEEEEGDFDPTKDP<br>PPAECKQQ       |
| XP_005170732.1 | DrNAP1L4-X1 | D. rerio | NAP family |                                                                                                                                                                                                                                                                                                                                                                                                                                                                      |

|                |          |            |            |                                                                                                                                                                                                                                                                                                                                                                                                                                                                                                                                                  |
|----------------|----------|------------|------------|--------------------------------------------------------------------------------------------------------------------------------------------------------------------------------------------------------------------------------------------------------------------------------------------------------------------------------------------------------------------------------------------------------------------------------------------------------------------------------------------------------------------------------------------------|
|                |          |            |            | MADIDNKEQSELDQ<br>DLDDVEEVEEEETGEE<br>TKLKARQLTVQMMQ<br>NPQLAALQERLDGL<br>VETPTGYIESLPRVVK<br>RRVNALKNLQVKCA<br>QIEAKFYEEVHDLERK<br>YAVLYQPLFDKRFEL<br>NAIYEPTEECEWKP<br>DEEDEISEELKEKAKIE<br>DEKKDEEKEDPKGIPE<br>FWLTVFKNVDLLSDM<br>VQEHDEPILKHLKDIK<br>VKFSDAGQPMSEVLE<br>FHFEPNEYFTNEVLTK<br>TYRMRSEPDSDPFS<br>FDGPEIMGCTGCQID<br>WKKGKNVTLKTIKKK<br>QKHKGRTVRTVTKT<br>VSNDSFFNFAPPEV<br>PESGDLDDAEAILA<br>ADFEIGHFLRERIIPRS<br>VLYFTGEAIEDDDDDY<br>DEEGEEADEEGEEEG<br>DEENDPDYDPKKDQ                                                         |
| NP_001294853.1 | HsNAP1L1 | H. sapiens | NAP family | NPAECKQQ                                                                                                                                                                                                                                                                                                                                                                                                                                                                                                                                         |
|                |          |            |            | EEAGNQIMVEGLGE<br>HLERGEDAAAGLGD<br>DGKCGEEAAAGLGEE<br>GENGEDTAAGSGED<br>GKKGGDTDEDSEAD<br>RPKGLIGYVLDTFVE<br>SLPVKKYRVLALKKL<br>QTRAAANLESKFLREF<br>HDIERKFAEMYQPLL<br>EKRRQIINAIYEPTEEE<br>CEYKSDSEDCDDEEM<br>CHEEMYGNEEGMV<br>HEYVEDDDGYEDYYY<br>DYAVEEEEEEEEDDI<br>EATGEENKEEDPKGI<br>PDFWLTVLKNVDTLT<br>PLIKKYDEPILKLLTDIK<br>VKLSDPGEPLSFTLEF<br>HFKPNEYFKNELLTKT<br>YVLKSLAYYPHPYR<br>GTAIEYSTGCEIDWN<br>EGKNVTLKTIKKQK<br>HRIWGTIRTVTEDFPK<br>DSFFNFFSPHGITSNG<br>RDGNDLGLGHNLRT<br>YIIPRSVLFFSGDALES<br>QQEGVVREVNDIY                   |
| NP_068798.1    | HsNAP1L2 | H. sapiens | NAP family | DKIIYDNWMAAIEEV                                                                                                                                                                                                                                                                                                                                                                                                                                                                                                                                  |
|                |          |            |            | HGVAEEEMASSTSDS<br>GEESDSSSSSSTSDSS<br>SSSSTSGSSSGSGSSS<br>SSGSTSSRSRLYRKRR<br>VPEPSRRARRAPLGT<br>NFVDRLPQAVNRNV<br>QALRNIQDECDKVD<br>LFLKAIDLERKYAEL<br>NKPLYDRRFQIINAEY<br>EPTEECEWNSDEEE<br>FSSDEEVQDNTPSEM<br>PPLEGEENPKENPE<br>VKAEEKVPKEIPEVK<br>DEEEKVPKEIPEVKA<br>EKADSKDCMEATPEV<br>KEDPKEVPQVKADDK<br>EQPKATEAKARAAR<br>ETHKRVPEERLQDSV<br>DLKRARKGPKKREDP<br>KGIPDYWLIVLKNVD<br>KLGPMIQKYDEPILKF<br>LSDVSLKFSKPGQPV<br>YTFEFHLPNPYFRNE<br>VLVKTYIIKAKPDHND<br>PFFSWGWEIEDCKG<br>CKIDWRRGKDVTTT<br>TQSRRTATGEIEIQPR<br>VVPNASFFNFSPPEI |
| NP_004529.2    | HsNAP1L3 | H. sapiens | NAP family |                                                                                                                                                                                                                                                                                                                                                                                                                                                                                                                                                  |



|                |          |            |            |                                                                                                                                                                                                                                                                                                                                                                                                                                                                                                                                                |
|----------------|----------|------------|------------|------------------------------------------------------------------------------------------------------------------------------------------------------------------------------------------------------------------------------------------------------------------------------------------------------------------------------------------------------------------------------------------------------------------------------------------------------------------------------------------------------------------------------------------------|
| NP_005960.1    | HsNAP1L4 | H. sapiens | NAP family | MADHSFSDGVPSDS<br>VEAAKNASNTEKLT<br>QVMQNPRVLAALQE<br>RLDNVPHTPSSYIETL<br>PKAVKRINALKQLQ<br>VRCAHIEAKFYEEVH<br>DLERKYAALYQPLFDK<br>RREFITGDVEPTDAES<br>EWHSENEEEKLAGD<br>MKSKVVVTEKAAATA<br>EEDPKGIPEFWTIF<br>RNVDMSELVQEQYDE<br>PILKHLQDIKVKFSDP<br>GQPMSEVLEHFHFPN<br>DYFTNSVLTKYKMK<br>SEPDKADPFSEFGEPI<br>VDCDGTIDWKKGK<br>NVTVTIKKQKHKG<br>RGTVRTITKQVPNESF<br>FNFFNPLKASGDGES<br>LDESEFTLASDFEIG<br>HFFRERIIVPRAVLYFT<br>GEAIEDDDNFEEGEE<br>GEEEELEGDEEGEDE<br>DDAEINPKV                                                                 |
| NP_715638.1    | HsNAP1L5 | H. sapiens | NAP family | MADSENQGPAPESQ<br>AAAAEAAAEVMA<br>EGGAQGGDCDSAAG<br>DPDSAAGQMAEEPQ<br>TPAENAPKPNDFIES<br>LPNSVKCRVLALKKLQ<br>KRCDKIEAKDKEFQ<br>ALEKKYNDIYKPLLAKI<br>QELTGEMEGCAWTL<br>EGEEEEEEEDDEEE<br>GEDEEEEEAAEAAA<br>GAKHDDAHAEMPD<br>DAKK                                                                                                                                                                                                                                                                                                                |
| A6NFF2         | HsNAP1L6 | H. sapiens | NAP family | MMEGLGEHSTAGE<br>MGPLLGAVAATASP<br>QSLMEYSSDADFIESL<br>PLVVKYRVYTLKKLQA<br>KCAVLEAKYLFHFHSV<br>ERKFATYIGPLLEKRR<br>QITNALYEPTKEECER                                                                                                                                                                                                                                                                                                                                                                                                            |
| NP_001071165.2 | HsTSPY1  | H. sapiens | NAP family | MRPEGSLTYRVPERL<br>RQGFCEGVGRAAQAL<br>VCASAKEGTAFRMEA<br>VQEGAAGVESEQAA<br>LGEEAVLLDDIMAEV<br>EVVAEEEEGLVERREEA<br>QRAQQAVPGPGPM<br>TPESAPELLAVQVEL<br>EPVNAQARKAFSRQ<br>REKMERRRPHLDRR<br>GAVIQSVPGFWANVI<br>ANHQPMSALITDEDE<br>DMSYMSVLEVGEEK<br>HPVHLCKIMLFFRSN<br>PYFQNKVITKEYLVNI<br>TEYRASHSTIEWYPD<br>YEVEAYRRRHHNSSL<br>NFFNWFSHDHNFAGS<br>NKIAEILCKDLWRNPL<br>QYYKRMKPPEGTTET<br>SGDSQLLS                                                                                                                                             |
| NP_003300.1    | HsTSPYL1 | H. sapiens | NAP family | HSIIISDQVPSDQDAH<br>QYLRLRDQSEATQV<br>MAEPGEGGSETVALP<br>PPPPSEEGVPQDAA<br>GRGGTPQIRVVGGR<br>GHVAIKAGQEEGQP<br>PAEGLAAASVVMMA<br>DRSLKKGQVQGEKAL<br>EICGAQRSASELTAG<br>AEAEAEVKTGKCAT<br>VSAAVAERESAEVVK<br>EGLAEKEVMEEQME<br>VEEQPPEGEEIEVAEE<br>DRLEEEAREEEGPWP<br>LHEALRMDPLEAIQLE<br>LDTVNAQADRAFQQ<br>LEHKFGRMRRHLYER<br>RNYIIQNIPGFWMATA<br>FRNHPQLSAMIRGQ<br>DAEMLRYITNLEVVEL<br>RHPRTGCKFKFFFR<br>NPYFRNKLIVKEYEVR<br>SSGRVVSLSPIIWRR<br>GHEPQSFIRRNQDLIC<br>SFTWFSHDHSLPESDK<br>IAEIIKEDLWPNPLQY<br>YLLREGVRRARRRPLR<br>EPVEIPRPFQGSQ |

|             |          |             |            |                                                                                                                                                                                                                                                                                                                                                                                                                                                                                                                                                      |
|-------------|----------|-------------|------------|------------------------------------------------------------------------------------------------------------------------------------------------------------------------------------------------------------------------------------------------------------------------------------------------------------------------------------------------------------------------------------------------------------------------------------------------------------------------------------------------------------------------------------------------------|
|             |          |             |            | LSSSESQQRDP PPPPP<br>PPPLRLPLPPQQR<br>RLQEETAAQVLAD<br>MRGVGLGPALPPP<br>PYVILEEGIRAYFTLG<br>AECPGWDSTIESGYG<br>EAPPTESLEALPTPE<br>ASGGSLEIDFQVVQS<br>SSFSGGGALETCSAV<br>GWAPQRLVDPKSKE<br>EAIIVEDEDEDERES<br>MRSSRRRRRRRRRK<br>QRKVKRESRERNAER<br>MESILQALEDIQLDLE<br>AVNIKAGKAFRLKRK<br>FIQMRRPFLERRDLII<br>QHIFGFVVKAFNLH<br>PRISILINRRDEDFRYL<br>TNLQVQDLRHISMGY<br>KMKLYFQTNPYFTN<br>MVIVKEFQRNRSGRRL<br>VSHSTPIRWHRGQEP<br>QARRHGNQDASHSF<br>FSWFSNHSLPEADRI<br>AEIKNDLWVNPRLYY<br>LRERGSRIKRRKQEM<br>KKRKTGRCEVVIME<br>DAPDYYAVEDIFSEIS        |
| NP_071400.1 | HsTSPYL2 | H. sapiens  | NAP family |                                                                                                                                                                                                                                                                                                                                                                                                                                                                                                                                                      |
|             |          |             |            | MADIDNKEQSELDQ<br>DLEDVEVEEEETGEE<br>TKIKARQLTVQMMQ<br>NPQLAALQERLDGL<br>VDTPTGYIESLPKVVK<br>RRVNALKNLQVKCA<br>QIEAKFYEEVHDLERK<br>YAVLYQPLFDKRFELI<br>NAIYEPTEECEWKP<br>DEEDEVSEELKEKAKI<br>EDEKKDEEKEDPKGIP<br>EFWLTVFNVDLLSD<br>MVQEHDEPILKHLKD<br>IKVKFSDAGQPMSEV<br>LEFHFEPNDFYTNVNL<br>TKTYRMRSEPDSDP<br>FSFDGPEIMGCTGCQ<br>IDWKKGNVTLKTIK<br>KKQKHKGRTVRTVT<br>KTVSNDFFNFAPPE<br>VPENGLDDDAEAIL<br>AADFEIGHFLRERIIPR<br>SVLYFTGEAIEDDDDD<br>YDEEGEEADEEGEEE<br>GDEENDPDYDPKKD<br>QNPAECKQK                                                    |
| NP_056596.1 | MmNAP1L1 | M. musculus | NAP family |                                                                                                                                                                                                                                                                                                                                                                                                                                                                                                                                                      |
|             |          |             |            | EELGSQVMAEGPGES<br>QDRSEGVSIEPGDGG<br>QHGEETVAAGVGEE<br>GKGEEAAAGSGEDA<br>GKCGGTDESDSDRP<br>KGLIGYLLDTDFVESLP<br>VKVKCRVLALKKLQT<br>RAAHLESKFLREFHDI<br>ERKFAEMYQPLLEKR<br>RQJINAVYEPTEEECE<br>YKSDCEDYFEEEMDE<br>EETNGNEDGMVHE<br>YVDEDDGYEDCYDY<br>DDEEEEEEDDSAGA<br>TGGEENVNEEDPKGIP<br>DFWLTVLKNVEALTP<br>MIKKYDEPILKLLTDIK<br>VKLSDPGEPISFTLEF<br>HFKPNYFKNELLTKT<br>YVLKSLACYDPHPYR<br>GTAIEYATGCDIDWN<br>EGKNVTLRTIKKKQR<br>HRVWGTVRTVTEDF<br>PKDSFFNFSPHGSL<br>NGGDENDDFLLGHN<br>LRTYIIPRSLVFFSGDA<br>LESQQEGVVREVND<br>E<br>IYDKIYDDWMAAIEE |
| NP_032697.2 | MmNAP1L2 | M. musculus | NAP family |                                                                                                                                                                                                                                                                                                                                                                                                                                                                                                                                                      |

|                |          |             |            |                                                                                                                                                                                                                                                                                                                                                                                                                                                                                                                                                          |
|----------------|----------|-------------|------------|----------------------------------------------------------------------------------------------------------------------------------------------------------------------------------------------------------------------------------------------------------------------------------------------------------------------------------------------------------------------------------------------------------------------------------------------------------------------------------------------------------------------------------------------------------|
|                |          |             |            | HGVAEEAMASTACD<br>SGDESDSNSSSSTNSC<br>SSSGSSSSGSSSSSSSS<br>SSSSSSSSSSSSGSSGS<br>SSNGSHLNRKKRVPE<br>PSRRAQRRPSGKLFL<br>DKLPQAVRNRVQAL<br>RNIQNECDKVDTLFL<br>RAIHDLERKYAELNKP<br>LYDKRFQIINAEYEPT<br>EEEECEWNSEEFSGD<br>EEMQDDTPNEMPPL<br>EGEEEEECNEKAEVK<br>EEGTHVPEEVPEAKV<br>EEEEAPKETPEVKTEE<br>KDIPKEGAEKAEQEE<br>SSKEIPEVKGEKADS<br>TDCIDIAPEEKEDVKE<br>VTQANTENKDQPTTEE<br>FTPRAPAREAQKRVP<br>ETRPEEGVNIKRAK<br>GKPKKEDPKGIPDYW<br>LTVLKNVDKLGPMIQ<br>KCDEPLKFLSDVSLKF<br>SNPGQPIGYTFEFHFL<br>PNPYFRNELLMKTYII<br>RSKPDHYDPFFAWG<br>WEIEECKGCKIDWRR |
| NP_620081.1    | MmNAP1L3 | M. musculus | NAP family |                                                                                                                                                                                                                                                                                                                                                                                                                                                                                                                                                          |
|                |          |             |            | MAENSLSDGGPADS<br>VEAAKNASNTEKLT<br>QVMQNPQVLAALQE<br>RLDNVSHTPSSYIETL<br>PKAVKRRINALKQLQ<br>VRCAHIEAKFYEEVH<br>DLERKYAALYQPLFDK<br>RREFITGDVEPTDAES<br>AWHSENEEEDKLAG<br>DMKNKVIVIAEKAAAT<br>VEELNPKGIPEFWFTI<br>FRNVDMSELVQEYD<br>EPILKHLQDIKVKFSD<br>PGQPMSFVLEFHFEP<br>NDYFTNPVLTKTYKM<br>KSEPKADPFSFEGPE<br>IVDCDGTIDWKKGK<br>NVTVKTIKKQKHKG<br>RGTVRTITKQVPNESF<br>FNFFSPLKASGDGESL<br>DEDEFTLASDFEIGH<br>FFRERIVPRAVLYFTG<br>EAIEDDDNFEEGEEG<br>EEEELEGDEEDED<br>DADVNPKV                                                                         |
| NP_001272418.1 | MmNAP1L4 | M. musculus | NAP family |                                                                                                                                                                                                                                                                                                                                                                                                                                                                                                                                                          |
|                |          |             |            | MADPEKQGPAAESRA<br>EDEVMEGAQGGEDA<br>ATGDSAAAPAAEPP<br>QAPAEANAPKPKDF<br>MESLPNSVKCRVLAL<br>KKLQKRCDKIEAKFDK<br>EFQALEKKYNDIYKPL<br>LAKIQELTGEMEGCA<br>WTLLEGEDDEDEED<br>DEEEEEEEAAGAT<br>GGPNFAKK                                                                                                                                                                                                                                                                                                                                                       |
| NP_067407.1    | MmNAP1L5 | M. musculus | NAP family |                                                                                                                                                                                                                                                                                                                                                                                                                                                                                                                                                          |
|                |          |             |            | MSSPERDEGTPVPDS<br>RGHCDADTVSGTPD<br>RRPLLGEKAVTGEG<br>RAGIVGSPAPRDVEG<br>LVPQIRVAAARQGES<br>PPSVRGPAAAVFVTP<br>KYVEKAQETRGAESQ<br>ARDVKTEPGTVAAAA<br>EKSEVATPGSEEVME<br>VEQKPAGEEMEMLE<br>ASGGVREAPPEAGP<br>WHLGIDLRNPLEAI<br>QLELDTVNAQADRAF<br>QHLEQKFGRMRRHY<br>LERRNYIIQNIPGF<br>MTAFRNHPQLSAMI<br>RGRDAEMLRVTSLE<br>VKELRHPKTGCKKFF<br>FRRNPYFRNKLIVKEY<br>EVRSSGRVVSLSPII<br>WRRGHEPQSFIRRN<br>QDLICFFTFWSDHSL<br>PESDRIAEIHKEDLWP<br>NPLQYYLCREGIRRP<br>RRPIREPVEIPRPF<br>QSG                                                                    |
| NP_033459.1    | MmTSYL1  | M. musculus | NAP family |                                                                                                                                                                                                                                                                                                                                                                                                                                                                                                                                                          |

|             |           |             |            |                                                                                                                                                                                                                                                                                                                                                                                                                                                                                                                                                     |
|-------------|-----------|-------------|------------|-----------------------------------------------------------------------------------------------------------------------------------------------------------------------------------------------------------------------------------------------------------------------------------------------------------------------------------------------------------------------------------------------------------------------------------------------------------------------------------------------------------------------------------------------------|
| NP_084112.1 | MmCINAP/M | M. musculus | NAP family | SSSEPRQRDLPPPPPP<br>PLQLRLPPPQQRRPR<br>PQEETEAQVLADM<br>RGVGPTLPPPLPYVIL<br>EEGGIRAYFTLSAESP<br>GWDHAMESGFGEA<br>PSTGIMETLPSSEISG<br>GSLAIDFQVAEPSSLG<br>EKALETCSLGGWGPQ<br>MLVGPKRKEEAIIVE<br>DEDEDDKESVRRRQR<br>RRRRRRKQRKAKESR<br>ERSAQRMESILQALES<br>IQMDLEAVNIKAGKA<br>FLRLKRKFIQMRRPFL<br>ERRDLIQHIPGFVWK<br>AFLNHPRISILINQRD<br>RDIFRYLTNLQVQDLR<br>HISMGYKMKLYFQTN<br>PYFTNMVIVKEFQRN<br>RSGRLVSHSTPIRWH<br>RGQEPQAYNRRSHD<br>TRESFFNWFSNHSLP<br>EADRIAIEIKNDLVV<br>NPVRYMRRGGYRS<br>SRKKQHGERAKNQ<br>YEMVIMEDAHDHYAI<br>EDILSDISEIDEITDNET |
| NP_941019.2 | MmTSPYL3  | M. musculus | NAP family | MAWEGIGVLEATMC<br>LPPIQERDAHPARPR<br>VPGAELRPCNPAAS<br>PATAPPSSSENTGENS<br>ASRVNLNDGCEKSGG<br>NGVGTKKKTVEVTTE<br>EDSVAAEPAEVGEK<br>LEWVVAEQESLRPLD<br>LRALIVDPLEAIQWEL<br>EAMSAQADGAHLQL<br>VRRFGRMRRLLHARR<br>SFIIQNIPGFWVTAF<br>NHPQLSAMISPRDED<br>MLGYLMNLEVREL RH<br>SRTGCKFKFLFESNPY<br>FRNEVIVKEYECRASG<br>GVVSIATRILWHRGQ<br>EPPALVHRNRDAVRS<br>FFSWFSQHSLEADR<br>VAQIIKDDLWPNPLQ<br>YYLLGQRPYRARRSLA<br>RWSAEARPRPYGFQ<br>SG                                                                                                                |
| NP_084479.1 | MmTSYL4   | M. musculus | NAP family | MNGVEGNNELSLAN<br>TTTPSHASEDLDLKQ<br>DQGLQEETDTVREM<br>EAAGEAGADGGASP<br>DSEHCPELCFRVAE<br>NSCAAAARGLEDAPS<br>PSKGGDAPSAPVAA<br>DDSSKNGCQLEGPHS<br>PAKPKALEACGAVGL<br>GSQQMPGPKKTKEM<br>TTTKCAISVATGKEGE<br>AGAAMQEKKGLQKE<br>KKVAGGKKEETRPRA<br>PKINCMDSLAIDQEL<br>SNVNAQADRAFLQLE<br>RKFGMRRLHMQRR<br>SFIIQNIPGFWVTAFR<br>NHPQLSPMISGQDE<br>DMMRYMINLEVEEL<br>KQPRVGCKKFIFQS<br>NPYFRNEGLVKEYER<br>RSSGRVVSLSPIRW<br>HRGQEPQAHHRNR<br>EGNTIPSFFNWFS DH<br>SLLEFDRIAIEIKGELW<br>SNPLQYYLMGDGPR<br>RGVRVPPRPQPVESPR<br>SFRFQSG                      |

|                |           |               |            |                                                                                                                                                                                                                                                                                                                                                                                                                                                                                                                                        |
|----------------|-----------|---------------|------------|----------------------------------------------------------------------------------------------------------------------------------------------------------------------------------------------------------------------------------------------------------------------------------------------------------------------------------------------------------------------------------------------------------------------------------------------------------------------------------------------------------------------------------------|
| NP_001078890.1 | MmtTSPYL5 | M. musculus   | NAP family | MSGRSRGRKSSRAK<br>GRGKGRARARVRAA<br>AEDAWHDEKPPQSP<br>RLGEDSAAAQVQAG<br>AAQGGAEPAELREEA<br>ACRLPLDCGLALRAR<br>AADERGLAAPDPDLE<br>RARSLAERLTSDFV<br>GTVGALAKLRGSR<br>GNRRVPGRKAPDTRS<br>ATGRGPQATVSGKPK<br>MASAGLCAAAPVGE<br>EKKMTEKHAGAGSP<br>ATVGSMDTLETVQLK<br>LETMNAQADRAYLRL<br>SRKFGQLRLHHLERR<br>NLIQSIPIGFWGQAF<br>QNHPLQLSAFLNTKDK<br>EVLSYLNRLVEEELGL<br>ARLGYKIKFYFGRNPY<br>FQNKVLIKEYGCGPS<br>GQVVSRSAPIQWLP<br>GHDLSLSKENPENN<br>GSFFGWFSNHSSIES<br>DKIVEINEDLWPNPL<br>QYYLISEEARGEKKE<br>ERPGPAKLSAPAVR<br>QPN            |
| NP_012974.1    | ScNAP1    | S. cerevisiae | NAP family | MSDPRTKPKSSMQI<br>DNAPTPHNTPASVLN<br>PSYLKNGNPVRAQA<br>QEQQDKIGTINEEDIL<br>ANQPLLLQSIQDRLG<br>SLVGQDSGYVGGLPK<br>NVKEKLLSLTLQSELF<br>EVEKEFQVEMFELEN<br>KFLQKYKPIWEQRSRI<br>ISGQEQPKPEQJAKG<br>QEIVESLNETELLVDE<br>EEKAQNDSEEEQVKG<br>IPSFWLTALENLPIVC<br>DTITDRDAEVLEYLQD<br>IGLEYLTDGRPGFKLLF<br>RFDSSANPFFTNDILC<br>KTYFYQKELGYSGDFI<br>YDHAEGCEISWKDN<br>AHNVTVDLEMRKQR<br>NKTTKQVRTIEKITPIE<br>SFFNFFDPPKIQNED<br>QDEELEEDLEERLALD<br>YSIGEQLKDKLIPRAV<br>DWFTGAALFEFEED<br>EEEADEDEDEEDDD<br>HGLEDGDSAEQ<br>DDFAGRPEQAPECK<br>QS |
| NP_014153.1    | ScVP575   | S. cerevisiae | NAP family | MMSDQENENEHAK<br>AFLGLAKCEEVDAIE<br>REVELYRLNKMMPVY<br>EKRDAYIDEIAEFWKI<br>VLSQHVSFANYIRAS<br>DFKYIDTIDKIKVEWL<br>ALESEMYDTRDFSITF<br>HFHGIEGDFKEQQVT<br>KVFQIKKGKDDQEDG<br>ILTSEPVPIEWPQSYD<br>SINPDLIKDKRSPEGK<br>KKYRQGMKTIFGWF<br>RWTGLKPGKEPHG<br>DSLASFSEEIYPFCVK<br>YYAEAQRDLEDEEGE<br>SGLSADGDSEDDDGS<br>LGEVDLPLSDEEPSSK<br>KRKV                                                                                                                                                                                              |

|                |          |               |            |                                                                                                                                                                                                                                                                                                                                                                                                                                                                        |
|----------------|----------|---------------|------------|------------------------------------------------------------------------------------------------------------------------------------------------------------------------------------------------------------------------------------------------------------------------------------------------------------------------------------------------------------------------------------------------------------------------------------------------------------------------|
|                |          |               |            | MGKGSTFGGPPSAN<br>AAAEHDEEELD LAEL<br>QDALGSPHELPPVV<br>RRRVDALSNLHKQYL<br>TLQKQYHAEVRELER<br>KYQKLYDPVFDKRAN<br>IVSGSYEPTDEEAKVE<br>KAEEEEGVKKREAQP<br>GDADIKGVPEFWLTV<br>LQNNGFVAQSIFEED<br>EEALSFLRDIRYSELEG<br>ENEGFTLTFFHAENPF<br>FSNTTSLKTYHMEQD<br>ELMGELQYDHATGTK<br>IEWKAGKNLTVKQTK<br>KKTAKAGKKPARVVT<br>VEEPCDSFFSFFSPVQ<br>LPASEEEELSEEDAQN<br>MEMDFEIGCIKDKLI<br>PFSVLWFTGEAAEYE<br>DDDDDMFGDEEGD<br>DDEEDDEEDDDEEEE<br>EEAPKRGKRGQGGG<br>PGHSFAPPPGAKPGA |
| -              | PpNAP1L1 | P. polyceph   | NAP family | GAPGQQQPECKQQ                                                                                                                                                                                                                                                                                                                                                                                                                                                          |
|                |          |               |            | MAAPKTRKSTEPED<br>TVDDEDIQVLEGIQD<br>QIEELNDKATEILEVE<br>RKYNRLRKPMDKRA<br>EAIKLPFWFKVFTS<br>QDMLAALLVGEDLA<br>AFKYMKELNVEDHD<br>DVKSGFKISLKFDPNP<br>FFKNELLSKEFRYDKE<br>GNLTVIPTKIEWKDG<br>KDLTKKSQSDTKGK<br>RSRDEESESFTWFN<br>PDDQDLAEIIEEL<br>WPNPAKYLLGLVEDE<br>AEEEGDDDEGEDD<br>GEDGEGEGEGEAE<br>EDQ                                                                                                                                                              |
| -              | PpSET    | P. polyceph   | NAP family |                                                                                                                                                                                                                                                                                                                                                                                                                                                                        |
|                |          |               |            | MAPKRSPLPPQKK<br>KPRPPPALGPEETSAS<br>AGLPKKGEKEQQAIE<br>EHIDEVQNEIDRLNE<br>QASEEILKVEQKYNKL<br>RQPFQKRSELIAKIP<br>NFWVTTFVNHPQVS<br>ALLGEEDEALHYLTR<br>VEVTEFEDIKSGYRIDF<br>YFDENPYFENKVLKE<br>FHLNESGDPSSKSTEI<br>KWKSGKDLTKRSSQT<br>QNKASRRQHHEEPES<br>FFTWFTHSDAGAD<br>ELGEVIKDIWPNPL<br>QYYLVPDMDDDEEGE<br>GEEDDDDEEEGLE<br>DIDEEGDEDEGEDE<br>DDDEEGEEDEGEDD                                                                                                       |
| NP_001116293.1 | HsSET    | H. sapiens    | NAP family | D                                                                                                                                                                                                                                                                                                                                                                                                                                                                      |
|                |          |               |            | MSENNEIEMELPFDS<br>SAITSTEVLDRVNALL<br>TLQDTQNELTEQMEK<br>EILEIEKKYKKFQPLA<br>EKRFEIVSGKVEPTKE<br>DQCKKAPIQVENLKS<br>VPTDKGIPKFWLHVL<br>QNTEVKDIIIECDIEAL<br>EYLVDIKIVQVGDAQ<br>DYSLDFHFSENPFFTN<br>TVISKTVKLEEDNELN<br>EIVSTPINWKDGKNF<br>TVQSKKKTVKSPTK<br>GKAATTTSTTVQEVV<br>PCFFSTFVSPNQDPTS<br>DEEAEIMYIQYQIA<br>KLKDIVIPEAVNFFLG<br>RASDAEENDYDFGED<br>FEDEEGEDDEEDDE<br>EEQTIKKPSGKGAQ<br>PQQPQDCKQQ                                                            |
| XP_645850.1    | DdNAP1   | D. discoideum | NAP family |                                                                                                                                                                                                                                                                                                                                                                                                                                                                        |

|                |         |               |            |                                                                                                                                                                                                                                                                                                                                                                                                                                                                                                                                                     |
|----------------|---------|---------------|------------|-----------------------------------------------------------------------------------------------------------------------------------------------------------------------------------------------------------------------------------------------------------------------------------------------------------------------------------------------------------------------------------------------------------------------------------------------------------------------------------------------------------------------------------------------------|
| XP_642786.1    | DdNAP2  | D. discoideur | NAP family | MSKHQKKEVEFEK<br>DDPKAVYLELFDKTE<br>LKSLSDEIEKLTGEKDL<br>ELMKCDKDIYKSAEPL<br>YRERRALLEIPDFWA<br>TIFTNLFKLGFVDEL<br>MCVDDFFVEDTETEF<br>RLFIDFRENDIISNKQ<br>VIITVTPTTSEELSQE<br>VKISTTPIELKQNKET<br>EKKNKDSKKSTDDED<br>EEDDDDEISGFLKLL<br>NPTKDIATFIVGSVW<br>SNPIDSFNCDDDEDY<br>DGLIASDSEGEEDK                                                                                                                                                                                                                                                        |
| NP_650438.2    | DmSET   | D. melanogas  | NAP family | MSSVPKRAKLDGAP<br>ADGNTSAAAGNNEE<br>ESEALEQIDACQNEID<br>ALNEKASEILKVEQK<br>YNKLRKPCYKRSELV<br>KRIPNFWVTSFINHP<br>QVSGILDEEEECLEHA<br>LNKLEVEEFEDIKSGY<br>RINFHFDENPYFENK<br>VLTKEFHLSAAASE<br>NGDWPASTSTPIKW<br>KEGKNLLKLLTKPYG<br>NKKRRNSEYKTFDFW<br>FSDNTDPVNDEIAELI<br>KDDLWPNPLQYYLVP<br>DIEVEPEEEDNEDN<br>DEEAFDEDEDGEDGE<br>GEEEEDEDDK                                                                                                                                                                                                        |
| NP_001246485.1 | DmNAP1  | D. melanogas  | NAP family | MDAPAEGHVDPESC<br>NEIEDEKSGSDCQSM<br>PAYMNSVMRRQYLQ<br>QMVKMLPAPVQNRI<br>VFLKNLQQLHNLIEA<br>QFFEDVYKLEQYQV<br>QYQPLFDKRREIEGK<br>VDPAEKPKQWKEPES<br>STDNEADAEHFREAL<br>SSLKSIPKDAKGIPGF<br>WLTVFRNTAIMSEM<br>VQPHDEPAIRKLIDISI<br>KYDNGHSYTLFHFHD<br>KNEYFSNSVLTQYVL<br>KSTVDPNDPFAFEGP<br>EYKCTGCTINWEKK<br>MNLTKTIRKKQKHK<br>ERGAVRTIVKQVPTD<br>SFFNFFSPPEVPSDQE<br>EVDSDSQILATDFEI<br>GHFLRARIIPKAVLYY<br>TGDIVDEDEDEDEEE<br>YDENEEDEYDDDDAP<br>PPKGPKSAGIKKQSP<br>NDPCPNQ                                                                       |
| NP_058661.1    | MmNCKP1 | M. musculus   | NAP family | KLTLNDRGVGMLTR<br>LYNIKKACGDPKAKPS<br>YLIDKNLESVAVKFIVRK<br>FPAVETRNNNQQLA<br>QLQKEKSEILKNLALY<br>YFTFVDVMEFKDHVC<br>DLLNTIDVCQVFFDIT<br>VNFDLTKNYLDLTVTY<br>TTLMILLSRIERKAIIG<br>LYNYAHMETHGASD<br>REYPRLGQMIVDYEN<br>PLKKMMEEFVPHSKS<br>LSDALISLQMVYPRR<br>NLSADQWRNAQLLS<br>LISAPSTMNPAQSD<br>TMPCEYLSLDAEK<br>WIIFGFILCHGMLNTE<br>ATALNLWKLALQSSS<br>CLSFRDEVFHIHKAA<br>EDLFVNIRGYNKRIND<br>IRECKEAAVSHAGSM<br>HRERRKFLRSALKELA<br>TVLSQDPGLGPKALF<br>VFMALSFARDEIWL<br>RHADNMPPKSADDF<br>IDKHIAELIFYMEELRA<br>HVRKYGPVMQRYV<br>QYLSGFDVAVVLNVL |

|                |          |              |            |                                                                                                                                                                                                                                                                                                                                                                                                                                                                                                                                       |
|----------------|----------|--------------|------------|---------------------------------------------------------------------------------------------------------------------------------------------------------------------------------------------------------------------------------------------------------------------------------------------------------------------------------------------------------------------------------------------------------------------------------------------------------------------------------------------------------------------------------------|
|                |          |              |            | LKRNDASPIRRGPT<br>EEAWNADDTGTRST<br>DSPMWRRVSMSTN<br>RSQPNGKNVQKTRQ<br>IEWVIHLQNVAQGL<br>MTKLHLHQILGPPE<br>PGSNMQYPESFWKT<br>GIIPDMPKLCQHVAR<br>KFPEHPAKIQLDKVD<br>KAGVDLLHEHAGRYV<br>ATLEPWIMVLEDLMT<br>FREQLRVILDLSSTVV<br>TLMPPNQNPILLQVF<br>MDLFCCFVRVNLLAD<br>KVPRKMLQMHNLV<br>HTIMKSGRDYGAYHR<br>MVQFVEAYDPPLKGL<br>HDDLNFVSPRIGEILD<br>AVGPTVLLGSDFQRL<br>RSEGYSFHPRYPEK<br>LTNSAHPARAQDLV<br>NIEAYREWALIGYLC<br>PTELLRPGAVDIALVL<br>LKESLLPLFRDEYVLL<br>HEEYQQVLPRIAESK<br>KLAKAGRAKGGDAD<br>VEYNLAKQVEKQICD<br>AQDTAINNADVHR |
| XP_024361543.1 | PpaNAP1  | P. patens    | NAP family |                                                                                                                                                                                                                                                                                                                                                                                                                                                                                                                                       |
|                |          |              |            | MSSETAAKHDHQC<br>EDHHDHEIDIDQQ<br>IEESIKELALGEKIRAV<br>AINHHLAEKKALDEEL<br>QKKIQALTFEYEQKS<br>MPIYAKTQEIIVQGRV<br>PTEELKDLEKYLKEEE<br>KTQVEGAKKEEPIEY<br>WLKAMKSNVDLAM<br>EIKEQDETALKTLTKIE<br>YVLEDTKKFHIVFTFG<br>PNDYFTNTELKKTVEL<br>DENEKPVKTGTPIE<br>WKEGNTTVKITKKT<br>QKNKKTGVKRVVERE<br>TKIESFFNFSDSAPT<br>DAPEEEDKEDEQA<br>MDGDRINIDFDIARSL<br>IDEVIPYSLEYFLGIKT<br>GGEDHDEIDMDDL<br>DEEEIAQLQKEYAAKT<br>GKKGPAAGGANDKK<br>DCKQQ                                                                                               |
| XP_001022132.2 | TtNAP1L1 | T. thermophi | NAP family |                                                                                                                                                                                                                                                                                                                                                                                                                                                                                                                                       |
|                |          |              |            | MRSKKNIVEEDYISFH<br>KDLSNKMSEKILHFEP<br>KFRIKLCAMLYHHKQ<br>KQNLDKDLHNELLKL<br>KRNYEKKTYEIIKQM<br>NSLIKEGTIILNDFSDI<br>SDHFTMPGDPNYLEP<br>LAYPKIQKYWSSCIQ<br>NCTILQHQFTKDDQD<br>IAQCLETIESREETKTT<br>KSFTLSFQFSQDQKYF<br>TNSFVQVTFYLDISVN<br>AYRQESNAEFKIKTG<br>NKETATTGIFLQLFQN<br>VNLEEGLNKISDAHD<br>LCTKLGRSYEIALFKD<br>ELIPYSLEYLNAARTPN<br>LKQEMLEKQLMEQY<br>QEKKKIKSFVQQQQ<br>EEADEELADEQYLED<br>NQCKQQ                                                                                                                          |
| XP_001024488.1 | TtNAP1L2 | T. thermophi | NAP family |                                                                                                                                                                                                                                                                                                                                                                                                                                                                                                                                       |



|                |           |              |            |                                                                                                                                                                                                                                                                                                                                                                                                                                                                                                                                                    |
|----------------|-----------|--------------|------------|----------------------------------------------------------------------------------------------------------------------------------------------------------------------------------------------------------------------------------------------------------------------------------------------------------------------------------------------------------------------------------------------------------------------------------------------------------------------------------------------------------------------------------------------------|
|                |           |              |            | MDEELKAVITIKDEYQ<br>LVKQKMEQQIQQL<br>QNEGYQLIHLYLK<br>DDLEQENKIYQSKVK<br>EILEKYTLGQQIFQS<br>VNQIFLKNKNYFKFIN<br>AIQQQDIISGRKFEQ<br>FSKEETADLDYFNIT<br>NHNDQRAKNERFAS<br>HEVLPISNYWFMAFK<br>NFDLVKPYVKEKDDQ<br>ILKHLHNIFVNIQDKS<br>SIELKFEFKENEFQ<br>QYLVKVFFLNDNMEP<br>ERSEGTQJEWYEGKD<br>VCRKTVKKSQKNRKT<br>GAIRVITHEVEDEEFF<br>NFFNSLNLEEIKLMG<br>QKKNSLIQQKNYID<br>RMNIDYDIARAIIDEL<br>LPYSLEYLDVRRLLSK<br>QAEVQDLNFLKEINE<br>SVSDSDSDGGDNQ<br>KNDNSPTKQSQNNK<br>GKKDIKDTSKDKSGV<br>QDNTNECKQY                                                  |
| XP_012655909.1 | TtNAP1L3  | T. thermophi | NAP family | KLTLNDRGVGMLTR<br>LYNIKKACGDPKAKPS<br>YLIDKNLESVAKFIVRK<br>FPAVETRNNNQQLA<br>QLQKEKSEILKNLALY<br>YFTFVDVMEFKDHVC<br>ELLNTIDVCQVLDIT<br>VNFDLTKNYLDLIVTY<br>TTLMIMLSRIEERKAI<br>GLYNYSHEMTHGAS<br>DREYPRLGQMIVDYE<br>NPLKMMEEFVPHS<br>KSLSDALISLQMVYPR<br>RNLSAEQWRNAQLL<br>SLISAPSTMLNPAQS<br>DTMPCEYSLDTMEK<br>WIIIGFILCHGILNTD<br>ATSLNLWKLALQSSS<br>CICLYRDEVLFHFKAA<br>EDLFVNIRGYNKRIND<br>IRECKENAVSHAGAT<br>HRERRKFLRSALKELA<br>TVLSQPGLLGPKALF<br>VFMALSFARDEIILL<br>RHADNIPKIIADDFM<br>DKHIAELIFYMEELRA<br>HVRKYGPVMQRYV<br>QYLSGFDVVLNELV |
| XP_012655909.1 | XINCKP1   | X. laevis    | NAP family | MCTDRSKFYEEVHEL<br>ERKYAALYQPLFDRS<br>DIINATYEPTEECEW<br>KVEEEDISGDLKEKAK<br>LEEKKDEEKEDPKGI<br>PEFWLTVFKNVDLLS<br>DMLQEHDEPILKHLK<br>DIKVKFSDAQPMSE<br>TLEFYFEPNEFFTNEV<br>LTKTYKMRSEPDSD<br>PFSFDGPEIMGCTGC<br>LIDWKKGKNVLTCTIK<br>KKQKHKGRGTVRTVT<br>KTVPNDSFFNFTTPE<br>VPENGELDDAEAIL<br>TADFEIGHFLRERIIPR<br>SVLYFTGEAIEDDDDD<br>YDEEGEEADDEEGEE<br>EADEDNDPDYEPKKG<br>QNPAECKQ                                                                                                                                                               |
| NP_001087969.1 | XINAP1L1A | X. laevis    | NAP family |                                                                                                                                                                                                                                                                                                                                                                                                                                                                                                                                                    |

|                |           |           |            |                                                                                                                                                                                                                                                                                                                                                                                                                                                                                                                                                        |
|----------------|-----------|-----------|------------|--------------------------------------------------------------------------------------------------------------------------------------------------------------------------------------------------------------------------------------------------------------------------------------------------------------------------------------------------------------------------------------------------------------------------------------------------------------------------------------------------------------------------------------------------------|
|                |           |           |            | MANIDNKEQTELDQ<br>QDMEDVEDVEEET<br>GEEANSKARQLTAQ<br>MMQNPQVLAALQE<br>RLDDLVTPTGYIESL<br>PKVVKRRVNALKNLQ<br>VKCAQIEAKFYEEVHE<br>LERKYAALYQPFKEKR<br>SDIINASYEPTEECE<br>WKVDEEDDIAEDLKE<br>KAKLEEEKKDEEKDP<br>KGIPEFWLTVFKNVD<br>LLSDMVQEHDPEILK<br>HLKDIKVFSEAGQP<br>MNFMLEHFHFEPEFF<br>TNELLTKTYKMRSEP<br>DESDPFSFDGPEIMG<br>CTGCLIDWKKGNVT<br>LKTIKKKQKHKGRT<br>VRTVTKTVPNDSFFN<br>FFSPPEVPENGELDD<br>DAEAILTADFEIGHFL<br>RERIIPRSVLVFTGEAI<br>EDDDDDYDEEGEEAD<br>DEEGEEADEHDHDPD<br>FDPKKAQNPAECKQ<br>Q                                             |
| NP_001080547.1 | XINAP1L1B | X. laevis | NAP family |                                                                                                                                                                                                                                                                                                                                                                                                                                                                                                                                                        |
|                |           |           |            | MANIDKTKKKNAALS<br>KEQTELDQQDMEDV<br>EDIEEEEAGEDANSK<br>ARQLTAQMMQNPQ<br>VLAALQERLDDLVT<br>PTGYIESLPKVVKRRV<br>NALKNLQVKCAQIEA<br>KFYEEVHELERYAAL<br>YQPLFKRSIIINATY<br>EPTEECEWKVDEEE<br>DISGDLKDKAKLEEK<br>KDEEKEDPKGIPEFW<br>LTVFKNVDLLSDMVQ<br>EHDEPILKHLKDIKVK<br>FSEAGQPMFTLEFH<br>FEPNDDFTNEVLTKTY<br>KMRSEPDESDFPSFD<br>GPEIMGCTGCLIDWK<br>KGKNVTLKTIKKKQK<br>HKGRGTVRTVTKTVP<br>NDSFFNFSPPEVPE<br>NGELDDDAEAILTAD<br>FEIGHFLRERIIPRSVL<br>YFTGEAIEDDDDDYD<br>EEGEEADDEEGEEA<br>DEDNDPDYEPKKDQ<br>NPAECKQQ                                     |
| NP_001001249.1 | XINAP1L1  | X. laevis | NAP family |                                                                                                                                                                                                                                                                                                                                                                                                                                                                                                                                                        |
|                |           |           |            | MSRWSEYLSVEEPIPS<br>AMATWRNMSADAP<br>QGSSAGSHKHLQME<br>PVVQLSKVAEGLLAK<br>MYRLNSILDYDPNPT<br>HTFSDAFWKAGVFP<br>NFPKICITMSKKFPEH<br>PNKLQLERVDFGLD<br>ALNENAEGYMHNLE<br>QWILLLLDLAFREQA<br>LRLLDLSSTVITLPH<br>QNSLILHAFMDLFCF<br>VRVNLFSDKMPRKMI<br>LQVYNILHIMLKGGR<br>DCEFYHRLVQFVDSY<br>DPPIKGLHEDLNFVSP<br>RIGEVLEAVGPIIFLST<br>DTKKLRNEGFLSPFHP<br>RYPDILTNSAHPMRA<br>QDLANVTSYREWVLL<br>GYLVCPDELLRVTSID<br>VAMVVLKENLILPLFR<br>DEVILLHENYQLYVLP<br>KVLESKRMAKSGRTK<br>QKEADLEYNVAKQVE<br>RMLTEVHEQALVSCD<br>AMHRERRILLKQEI<br>G<br>RMVLFTDQPSLLAP |
| NP_001335312.1 | ZmNAP1    | Z. mays   | NAP family |                                                                                                                                                                                                                                                                                                                                                                                                                                                                                                                                                        |

|                |         |               |      |                                                                                                                                                                                                                                                                                                                                                                                                                                                                                                                                             |
|----------------|---------|---------------|------|---------------------------------------------------------------------------------------------------------------------------------------------------------------------------------------------------------------------------------------------------------------------------------------------------------------------------------------------------------------------------------------------------------------------------------------------------------------------------------------------------------------------------------------------|
|                |         |               |      | EDDDGEPVHGDPAE<br>HDENDDDEDDDDVG<br>NEYENDGFIVNDEDE<br>EEEEEEDEERKDSDEE<br>RQKKKKRKKKDEGL<br>DEDDYLLQDNNVKF<br>KKRQYKRLKKAQREQ<br>GNGQGESSDDEFDS<br>RGGTRRSAEDKIKDR<br>LFDDVDVDDPPDDV<br>GDEEDLVVEEDVVG<br>EDEMAFIVDEDEH<br>GPPKRGNSKKKKYRQ<br>GSDITAMRDANEIFG<br>DVDELLTIRKKGLASN<br>QRMERRLEDEFPTV<br>LSEKYMGTGNDDEIRQ<br>LDIPERMQISEESTGS<br>PPVDEISIEEESNWIY<br>AQLASQLRESOGTFD<br>GRGFSVKNKDDIAKFL<br>ELHHVQKLEIPFIAMY<br>RKEQCRSLDTGDFD<br>GANQGGKPKETKWHK<br>VFWMIHDLKKWLL<br>LRKRKMALHGYTKR<br>YEESSRRVYDETRNLN<br>NQYLFESVIKSLKVAE |
| NP_001321759.1 | AtSPT6L | A thaliana    | SPT6 | EEVDRIVQDNEATNV<br>DGGDDDEEEEEEGP<br>DEYEKDGFIQDVED<br>EQEEEEERKDSDE<br>DLKAKKKRKRKRETE<br>NYLEDDEYELLQEA<br>NVTGFRPKPGSKKF<br>KRLKAGRDTQDEER<br>TRFSDDEEIEEGHSG<br>RTAEKLRSLFGDDE<br>GVPPEDISEDEQQEG<br>EDDEDIGDEMRDF<br>IVDEEVDENGLPVR<br>RRKPKKKVLRQAPGV<br>SSSALQEAHEIFGDVD<br>ELLFRKLGHGKAGD<br>GFDGVDSDVGKPK<br>RLEDEFEPSEEEKYM<br>TEKDRIREVDRPERI<br>QLSEETGPVPTDEESI<br>TKEAEWYISQLVGS<br>TGSPVGFQHIMRLD<br>KDHITAEIANVIGML<br>HVQKDFIPFIAMRYK<br>ELCLDLRDPPEEVLS<br>NEERDKSDKAPPLRW<br>HKVLWAIHNFDRKW<br>LLLQRRKKALAVSYK           |
| XP_020528358.1 | AtrSPT6 | A. trichopoda | SPT6 | GHSDDDEEPQSKMK<br>MAKEKSKRKKMVA<br>SSDEDEDDDDDEEN<br>RKEMQGFIADDDE<br>EEDAKSEKSESRHSG<br>EDELDEDLINENY<br>DIRETKQNRVQLGD<br>SSDEDEPIRRPNHED<br>DLLSERGSDDGDRR<br>KDRGRGDRGGYGE<br>SERSEDFIEDGDGA<br>PRRHRKRHRGDENLP<br>EGAEDDARDVFGVE<br>DFNLDEFYDDDDGED<br>GLEDEEEIEEDGEG<br>GEIKIRRKDTTKSTL<br>LESIEPSEIDRGFLPG<br>DKKIATEDLPERFQLR<br>RTPVTEADDELESE<br>ALWIIKYAFEETVTN<br>QADLDQDDKLDLIM<br>NLDPSVYEDRKKAVIK<br>SIKKVLQFIRVRSNSFE<br>PTFIGYRKEDIDNLLT<br>MNNLWRVYDFDEK<br>WCHLSEKKNKYDLM<br>RRMREYQELSDDLTA<br>KRRPISDADLMDTKY          |
| NP_497969.1    | CeSPT6  | C. elegans    | SPT6 |                                                                                                                                                                                                                                                                                                                                                                                                                                                                                                                                             |

|                |        |              |      |                                                                                                                                                                                                                                                                                                                                                                                                                                                                                                                                             |
|----------------|--------|--------------|------|---------------------------------------------------------------------------------------------------------------------------------------------------------------------------------------------------------------------------------------------------------------------------------------------------------------------------------------------------------------------------------------------------------------------------------------------------------------------------------------------------------------------------------------------|
|                |        |              |      | NIHPKKKFKNLNKNK<br>DDESELEEYHDSSEE<br>DENEPNQYQYDDFV<br>VGGDDDDERRRKKKKE<br>KRKKSSNSDNEDDN<br>EEEEEEDRGGGGSG<br>SGGSGSGGRNSSP<br>KRTNNHLDEDIDGDE<br>DGDDGSDGSESESES<br>EEDEEVAQARRERRR<br>KRREERRRREKGGLO<br>RLKLRASNKDLSKE<br>DDVEDGYNGEQEDD<br>GFVVDHSGKPKRSH<br>ERERMSYESSNRSRI<br>MSDIFDDDEEGYGS<br>GEEEEDSGINKTEAD<br>RAKDRLAIREQEYPS<br>LLEEKHFTDADEEIRN<br>KNVPERLQSRKGTQY<br>AGEMACEEEAEWIYE<br>VAFEQRDFQQQQQR<br>NPNTPEVRDAKAITAI<br>FKILQFIQRDLLEIPFIY<br>TYEKDIEVPYFTLQEL<br>WNIFDLDEKWAHM<br>KVNKRNLQIGSNNQ<br>QLEPYKSVLLESSEES |
| XP_645136.1    | DdSPT6 | D. discoideu | SPT6 | ELDVNERKRLKLLKA<br>AVSDSSEEEEDDEERL<br>REELKDLDNDPIEED<br>DSGGYSDGVSOGK<br>KRKKHEDDDLDRLE<br>DDDYDLIEENLGKVK<br>ERRKRFRRLRIHDNE<br>SDGEEQHVEGLVRE<br>QIAEQLFDENDESIGH<br>RSERSHREADDYDDV<br>DTESDADDFIVDDNG<br>RPIAEKKKKRRPIFTD<br>ASLQEGQDIFGVDFD<br>YDDFSKYEEDDYEDD<br>SEGDEYEDLGVGDD<br>TRVKKKALKKKVVK<br>KTIFDIYEPSELKRGHF<br>TDMDNIEIRKTDIPER<br>MQLREVPTVPVPEG<br>DELLEAEWIKYAF<br>KHTVSEKQEPESREK<br>MRKPPTTVNKKIKQL<br>EFIRNQLEVPPIAFY<br>RKEYVKPELNDDLW<br>KVVYDGIWCQLNER<br>KRKLKLVFEKMRQFQ<br>LDTLCADTDQVPVDD<br>VRLLDSDFERLADVQ |
| NP_001284936.1 | DmSPT6 | D. melanog   | SPT6 | EEKDLKPKKTQRFME<br>EEEEEEEENTEDQDE<br>HGNLRGLDDDDVEE<br>EEEEEGEPPAGEDS<br>DSGEEVRHRRKRFS<br>DDYLDLDDDLIEENL<br>GVKVRRKKKYSRVK<br>TMDDEGDDDEKDL<br>IADEIFTGDDGEGE<br>VEDGEAVDTLHPRDD<br>EEEEEDESDIDDIV<br>DDDGQPIKKKGKKF<br>SGYDAALQEAQEIF<br>GGDFFAEFDTEAYD<br>HAEIEEEQDDSW<br>DRPKKQTKRRVSRRSI<br>FEIYEPSESSHMTD<br>QDNEIRSTDMPERFQ<br>LRAIPVKPAEDELEE<br>EAEWIYRNAFSTPTIS<br>MQESTDYLDRTTTN<br>FSRKGPSTIAKKEALN<br>FMRNQHFVPPPIAFY<br>RKEYVEPELNNDLW<br>KVVQWDEKWTQLK<br>TRKQNLTRLFQRMQ<br>SYQFEQISADPKPLA<br>DSTRPLDTADMERLK             |
| NP_660094.1    | DrSPT6 | D. rerio     | SPT6 |                                                                                                                                                                                                                                                                                                                                                                                                                                                                                                                                             |

|                |         |             |      |                                                                                                                                                                                                                                                                                                                                                                                                                                                                                                                                                      |
|----------------|---------|-------------|------|------------------------------------------------------------------------------------------------------------------------------------------------------------------------------------------------------------------------------------------------------------------------------------------------------------------------------------------------------------------------------------------------------------------------------------------------------------------------------------------------------------------------------------------------------|
| NP_001307684.1 | HsSPT6  | H. sapiens  | SPT6 | NDEGEVVRVTKKFFV<br>EEEEDEEEEEENLD<br>DQDEQGNLKGFINDD<br>DDEDEGEDEGSDSDS<br>GSEDDVGHKKRRKRT<br>SFDDRLEDDDFDLIEE<br>NLGVKVKRGQKYRR<br>VKKMSDDEDDDEEEY<br>GKEEHEKEAIAEEIFQ<br>DGEGEGQEAAMEAP<br>MAPPEEEEEDEESD<br>IDDFIVDDDGQPLKK<br>PKWRKKLPGYTDAAAL<br>QEAQEIFGVDFDYDE<br>FEKYNEYDEEEEEYE<br>YEDDEAEGEIRVRPKK<br>TTKKRVSRRSIFEMYE<br>PSELESSHLTDQDNEI<br>RATDLPERFQLRSIPV<br>KGAEDDELEEEADWI<br>YRNAFATPTISLQESC<br>DYLDRGQPASSFSRK<br>GPSTIQKIKEALGFMR<br>NQHFVFPFIAFYRKEY<br>VEPELHINDLWRVWV<br>QWDEKWTQLRIRKE<br>NLTRLFEKMQAYQYE<br>QISADPKPLADGIR |
| NP_033323.2    | MmSPT6  | M. musculus | SPT6 | NHEGEVVRVTKKFFV<br>EEEEDEEEEEENLD<br>DQDERGNLKDFINDD<br>DDEEEGEDEGSDSG<br>DSEDDVGHKKRRKPS<br>FDDRLEDDDFDLIEEN<br>LGVKVKRGQKYRRVK<br>KMSDDEDDDEEEYG<br>KEEHEKEAIAAGEIFQD<br>EEGEEGQEAVEAPM<br>APPDEEEEDDEESDID<br>DFIVDDDGQPLKKPK<br>WRKKLPGYTDAAALQE<br>AQEIFGVDFDYDEFEK<br>YNEYDELEEDYED<br>DETEGEIRVRPKKTTK<br>KRVSRRSIFEMYEPSE<br>LESSHLTDQDNEIRAT<br>DLPERFQLRSIPVAAA<br>EDDELEEEADWIYRN<br>AFATPTISLQDSCDYL<br>DRGQPTSSFSRKGPS<br>TVQKIKEALGFMRNQ<br>HFEVFPFIAFYRKEYVE<br>PELHINDLWRVWQ<br>WDEKWTQLRIRKEN<br>LTRLFEKMQAYQYEQ<br>ISADPKPLADGIRAL |
| XP_024376317.1 | PpaSPT6 | P. patens   | SPT6 | GQDEYEKDGFIWDEE<br>EEEEEEPEEPQESSD<br>EDSKAKKKKKRGE<br>ETYELDEDDYDLQEA<br>NVTGFHRPPKADGKT<br>KFKRLKKGGIGEGEK<br>SGGIGLSDDDEEDG<br>GGRRGRRTAEELKRS<br>LFGEDDGAAEDVVE<br>EEELDEEEVDEDEM<br>ADFIVDEEEEVDEH<br>GEPKHKRKKKKVKR<br>KDFRQAPGINSIALQE<br>AQEIFGVDVTSLEERR<br>RRERDTLAGVDDED<br>VDDDDDDGYGRSRK<br>PPSQKLEKQFEPSSL<br>EEKFLTERDDRLRETD<br>VPERLQILEEAVGALP<br>TSDSAIRQAAEWIYD<br>RAFGLAVPVRPEFR<br>HLSRDRDLISRQIANV<br>LHLIHDDKFEIPFIAM<br>YRREECFDLLKEASDD<br>YEDEERPLVRTYAAL<br>WAVQQWDKKWLLL<br>QRRKTALQAAEKRI<br>PSDIRDDPEKDELVDK          |

|                |            |                |      |                                                                                                                                                                                                                                                                                                                                                                                                                                                                                                                                                              |
|----------------|------------|----------------|------|--------------------------------------------------------------------------------------------------------------------------------------------------------------------------------------------------------------------------------------------------------------------------------------------------------------------------------------------------------------------------------------------------------------------------------------------------------------------------------------------------------------------------------------------------------------|
|                |            |                |      | VDEENELEDETVGVE<br>DRSFFKYGHLQKRRR<br>RKVQSKSTVFQKGAQ<br>WYKGSRPSVGSRRK<br>RDRNSSAVINEESDD<br>SDENDGNDQETLAR<br>KFLEKQFEPSPLEAHN<br>VIARDRLRSTDIPERI<br>QVLEEVAGPLPRSIVE<br>LRRASEWIFDRAFGH<br>LCLYSRSEFQHLNLM<br>DKYEVVKQJANVLHL<br>VHNEKLEIPFIAMYRR<br>EECLDLLKELTDEVSH<br>EDRRTIYRFEALWAV<br>HEWNKKWLILQRRK<br>SDLQDSYEMRIPIGIIA<br>IPEKDNLFKRILSLAD<br>AESEQAVGDCCEAQF<br>NLHFPTVEVDMVDR<br>GFKRPKCRSSYCAH<br>DAGLGSITKYFGLTSE<br>AFGDNLKAGHKMNE<br>ILDEAFLPDDIASKFC<br>NESGPTTQFRDPASIL<br>RGARHMLAVEISTEP<br>SVRECVRMFYSKNAT<br>VNTRPTAGMEIIDA         |
| XP_024375737.1 | PpaSPT6-X4 | P. patens      | SPT6 | VNTRPTAGMEIIDA<br>EVSHEDRRTIYRFEAL<br>WAVHEWNKKWLIL<br>QRRKSDLQDSYEMRI<br>PIGIIAIEKDNLFKRIL<br>RSLADAESQAVGDC<br>EAQFNLHFPTVEVD<br>MVDRGFKRPKCRSSY<br>SCAHDAGLGSITKYF<br>GLTSEAFGDNLKAGH<br>KMNEILDEAFLPDDIA<br>SKFCNESGPTTQFRD<br>PASILRGARHMLAVEI<br>STEPVRECVRMFY<br>KNATVNTRPTAGM<br>EIIDAFHQFEVGLIK<br>DKQISAFDDEQWLLI<br>HKAEEKLIDVTVGVS<br>KESIDTFLSECEPLFSS<br>DGSTCTSQHWNEQR<br>KQILQEATVTILLSKM<br>EKEARMNLVTNAKR<br>VVVAQCVLQLWNKV<br>SIGPYDPKGSGRKC<br>RNEEGSALRVLACCW<br>GPASKGTTFVMLDA<br>DGEILNLTGYLSTK<br>VFTPEQAQRKENDQ<br>SRLLQVLIDFKPHIVL |
| XP_024375742.1 | PpaSPT6-X6 | P. patens      | SPT6 | VPEGEAAPEGAEEG<br>YQEGQAEGQEETQE<br>GEVAEQEEGAEEEGE<br>GESREKKKKKKKKRS<br>AFIEDEAILSGSEVDS<br>EEEDGDSQNEYEYDD<br>FTVPTGMEEEGREGG<br>GGGERRRRKKKKRR<br>HEETLEEDDYDLVRE<br>NTGQNIARRKQDSA<br>GAGGGNKNKKLKRRL<br>KQMGNRTDLYSNIQS<br>RLFDDDDDEAGPSEA<br>ITHEEPRSDDELDDDED<br>EDDFIVGADGKPIKRS<br>KQRRYRGGEDRGAL<br>QDAEDIFGSVDFFKQ<br>ASGRRSRPRGDEFDD<br>DGDYVDGTQGLSEDE<br>LDAEIEEGDEKQKDPL<br>ADIEHYEYPSLLEQKH<br>FTSEDEKIRQLDVPER<br>LQMRKGTAYDEKLVP<br>EEAEWIFTRAFARTH<br>ATDKAIIQRIIHVLRFL<br>QEQLLEVPFISTYRKD<br>YYQPLKISELWDIYD<br>WDEKWAHLQARKN          |
| -              | PpSPT6     | P. polycephala | SPT6 |                                                                                                                                                                                                                                                                                                                                                                                                                                                                                                                                                              |

|                |        |                 |      |                                                                                                                                                                                                                                                                                                                                                                                                                                                                                                                                                         |
|----------------|--------|-----------------|------|---------------------------------------------------------------------------------------------------------------------------------------------------------------------------------------------------------------------------------------------------------------------------------------------------------------------------------------------------------------------------------------------------------------------------------------------------------------------------------------------------------------------------------------------------------|
|                |        |                 |      | EIVNDNDETKAPSEEE<br>EGEDVFDSSSEEDID<br>EDEDEARKVQEGFIV<br>NDDDENEDPGTSISK<br>KRRKHRREREEDDR<br>LSEDDDLLMENAGV<br>ERTKASSSSGKFKRLK<br>RVGDEGNAAESES<br>NVAASRQDSTSKLED<br>FFSEDEEEESGLRNG<br>RNNEYGRDEEDHEN<br>RNRTADKGGILDELD<br>DFIEDDEFSDDEDETR<br>QRRIQEKLLREQSIK<br>QPTQJITGLSSDKIDE<br>MYDIFGDGHDYDWA<br>LEIENEELENGNDNN<br>EAEIEEEIDEETGAIKST<br>KKKISLQDIYDLEDLKK<br>NLMTEGDMKIRKTDI<br>PERYQELRAGITDYG<br>NMSSSEDQELERNWI<br>AEKISVDKNFDANYD<br>LTEFKEAIGNAIFITK<br>ENLEVFFIAYRRNYIS<br>SREKDGFLLTEDDLW<br>DIVSLDIEFHSLVNKK<br>DYVQRFYAELHIDDPI |
| NP_011631.1    | ScSPT6 | S. cerevisiae   | SPT6 | RNIGDEEEEDYQGOV<br>EEEEEGNNQVEEDDE<br>EEEDDDQDDYQQD<br>GFVVGDSSEEEIEEEE<br>DEDAEERRRRKKEKK<br>RQKKLEKQNQHRIL<br>KKGPKKRELSEDEME<br>NNEIQDLEEHEDSEE<br>GIPDRKRNRQQRSTG<br>NDGHQGDKMDLED<br>QGNEDYLEDVGDYG<br>AKYGKTAFEELFMD<br>ESGEEEQNENEDDEN<br>REVDDYIDVQQLFEP<br>DDLKKRFERDDDKKIK<br>EEDIPERLQIRMQGR<br>KAPDPEELMEETKWI<br>SEKIKTIKDYKGSKLLN<br>DINFHKKIFSFLQSLHL<br>DKEEVMYIYTYKNEF<br>HPQFDLEDLWRLYDL<br>DGEWAQFNQKNRI<br>LLQIQQLRRELENTPL<br>LIQNNIIDFEQVRKVE<br>EFFHKAIDTQSLKFIKE<br>YFDYLFKIYPQKEHQ<br>RLKIRKDRKTRMINTY<br>IQCKVHKLVTSLTLP      |
| XP_001030352.2 | TtSPT6 | T. thermophilus | SPT6 | WAIAAAGSDVTPACS<br>AFYPPASALDLLHF<br>WTKLFGKEYGFRRRQ<br>LGSALFTSERDSPRQ<br>SRERLCSLIAMDFVES<br>EAESEGEYEDGNNTA<br>ERSNKKFVEDDDEEE<br>EEENPEDQDELGNLK<br>GFINDDDDEDEEEEE<br>DEGGSGSDEDVGH<br>KKRKH5FDDRLEDDDD<br>FDLIEENLGKVKRQK<br>FRRVRKMSDDEDEEE<br>EDFGKEEHEKEAIAEE<br>IFQDGEDES RPDHVD<br>QPVAGPEEEEEEEDE<br>ESDIDDFIVDDGQP<br>LKKPKWRKKLPGYTD<br>AALQEAQEIFGVDFD<br>YDEFKYDEDDDEEME<br>EYDYEDDEGDAETRV<br>RPKKTAKKRVSRRSIF<br>EMYEPSELESSHLTDQ<br>DNEIRTTMPERFQL<br>RTISVKSAEDDELEEE<br>AEWIYRNAFATPTISL<br>QETNDYLERGQVGS<br>NFNRRKGPSTIQKIREA    |
| XP_041439251.1 | XISPT6 | X. laevis       | SPT6 |                                                                                                                                                                                                                                                                                                                                                                                                                                                                                                                                                         |

|                |        |                 |      |                                                                                                                                                                                                                                                                                                                                                                                                                                                                                                                                                  |
|----------------|--------|-----------------|------|--------------------------------------------------------------------------------------------------------------------------------------------------------------------------------------------------------------------------------------------------------------------------------------------------------------------------------------------------------------------------------------------------------------------------------------------------------------------------------------------------------------------------------------------------|
|                |        |                 |      | ADEEDPRPSRRNRDD<br>MDERDDDDDDDED<br>GQDEFEKDDFIVDDE<br>EEEEVEEEEEQKSDD<br>ERRRKKKKKKRESDD<br>FMLDEDDYMLLQDN<br>NITGISRPKPGNKFKR<br>LKKAGRESEMDEHSG<br>FSDGDGTGKKRSGKE<br>RVEYSLFGDHDQAAP<br>FEEDFEDDQQAAGEGE<br>EEVGDEDEDEMADFIV<br>EEDEIDGNGQVVRK<br>KFKKKVPRQAAGVSS<br>SALQEAQDIFGDVDE<br>LLALRKQELERREALNS<br>GELRGARLEDEFEPFI<br>LAEKYMTSKDEQIKE<br>NDVPERMQLSEELTG<br>YPPTDKTTIEESSWI<br>HSHLTGDGFLSFFGN<br>EHINKDIDQKDIVNV<br>VTMLHANKFEIPFIA<br>MYRKESCPTLLSFDS<br>EDNEDIESDARKLRW<br>HKLLWAVQALDRKW<br>LLLQKRKVALQLYK<br>RFDDEKRRIDDVTRQ |
| PWZ19394.1     | ZmSPT6 | Z. mays         | SPT6 |                                                                                                                                                                                                                                                                                                                                                                                                                                                                                                                                                  |
| NA             |        | A. thaliana     | APLF |                                                                                                                                                                                                                                                                                                                                                                                                                                                                                                                                                  |
| NA             |        | A. trichopoda   | APLF |                                                                                                                                                                                                                                                                                                                                                                                                                                                                                                                                                  |
| NA             |        | C. elegans      | APLF |                                                                                                                                                                                                                                                                                                                                                                                                                                                                                                                                                  |
| NA             |        | D. discoideum   | APLF |                                                                                                                                                                                                                                                                                                                                                                                                                                                                                                                                                  |
| NA             |        | D. melanogaster | APLF |                                                                                                                                                                                                                                                                                                                                                                                                                                                                                                                                                  |
|                |        |                 |      | VKVDASPGSEIVLINS<br>ECTVGRKKDCDLSFP<br>ANKLVSGNHCKITHD<br>QNSGKVWLEDNSTN<br>GTVINMSKVVKQT<br>HLLQNGDVIVFVYRK<br>NEPEQNIAYVYQSITP<br>QESASHDVEDAGREE<br>DSDLTETESAPVPEP<br>VIVKPLPQSGHEDPQ<br>PSTSSSLHFYNNPLS<br>TCSDVSARKNPVSS<br>AVCKGDSSTSGSPAQ<br>TRLKWTCWTDGEPE<br>EEMQKRRTDRDD<br>PGFGSAHSDASADIP<br>LRGASGKEKTEGATT<br>DKMEESLTCICQDLL<br>YDCISVQPCMHTEFCA<br>ACYSGWMERSFCP<br>TCRCPPERIRKNHILN<br>NLVEAYLLQHPEKCR<br>TEDDLRSMADARNKIT<br>QDMLQPKVERFSFDE<br>EASSDYLFELSDNDS<br>ISDMSQPYMMCRQC<br>PGYRKELSSALWICES<br>AQSESIAKTAGDGPS      |
| NP_001093485.1 | DrAPLF | D. rerio        | APLF |                                                                                                                                                                                                                                                                                                                                                                                                                                                                                                                                                  |
|                |        |                 |      | RVALAPGETVIGRGP<br>LLGITDKRVSRRHAILE<br>VAGGQLRIKPIHTNP<br>CFYQSSEKSQLPLKP<br>NLWCYLNPGDSFSL<br>VDKYIFRILSIPSEVEM<br>QCTLRNSQVLDEDNI<br>LNETPKSPVINLPHET<br>TGASQLEGSTEIAKTQ<br>MTPTNSVSFLGENRD<br>CNKQQPILAERKRILP<br>TWMLEHLSQNLNLS<br>VPAISGGNVIQSGGK<br>EEICKDKSQLNTTQ<br>GRRQLISSGSENTSA<br>EQDTGEECKNTDQEE<br>STISSKEMPQSFAITL<br>SNTEMNNIKTNAQR<br>NKLPIELGKVSXHKI<br>ATKRTPHKEDEAMSC<br>SENCSSAQGDSLQDE<br>SQGSHSESSNPSNP<br>ETLHAKATDSVLQGS<br>EGNKVKRTSCMYGA<br>NCYRKNPVHFQHF<br>HPGDSQYGGVQJVG<br>QDETDDRPECYPGPS<br>CYRKNPQHKEYRHN   |
| NP_775816.1    | HsAPLF | H. sapiens      | APLF |                                                                                                                                                                                                                                                                                                                                                                                                                                                                                                                                                  |



|                |        |                 |      |                                                                                                                                                                                                                                                                                                                                                                                                                                                                                                                                                 |
|----------------|--------|-----------------|------|-------------------------------------------------------------------------------------------------------------------------------------------------------------------------------------------------------------------------------------------------------------------------------------------------------------------------------------------------------------------------------------------------------------------------------------------------------------------------------------------------------------------------------------------------|
|                |        |                 |      | VPVGPQGTIVIGRPL<br>LGITDKRVSRRHAILE<br>VVDSQLRIKPIHRNPC<br>FYQSSEKQHSMPMET<br>QVWSQLHPGDSFSL<br>LDKYAFRVFSAESEVE<br>MECTLRNSQMLDED<br>DILSEMQKSPVVNLP<br>DKTTGASQLQGSPFIT<br>KTKCPTIDPMSSSGEC<br>RAFSEHQRPRTQRKR<br>ILPAWMLAESLSDQS<br>LSTPAEGGDKDVIQR<br>SGKAGTCEDRTPGNT<br>SWHGKKRLSPSGNSK<br>SVSAEQDPGKKCRKA<br>DQEGPGVSSENVPE<br>SSSNIVKDPDVIDVT<br>NKQKGILIEELGEVS<br>KHKAATKPTTNEEGE<br>SCARVQSKSPPEKSQ<br>GCHPESSAPSSPDAL<br>HTDTADPVLGCSEES<br>KVRRTACMYGANCY<br>RRNPLHFQHFSPHG<br>DSDYGEVHGTDEGVI<br>GDRPECPYGASCYRK<br>NPQHKMEYRHSALP |
| NP_001163960.1 | MmAPLF | M. musculus     | APLF |                                                                                                                                                                                                                                                                                                                                                                                                                                                                                                                                                 |
| NA             |        | P. patens       | APLF |                                                                                                                                                                                                                                                                                                                                                                                                                                                                                                                                                 |
|                |        |                 |      | AQNQEKKEKEKKK<br>GGSVGEGGARWVLE<br>CSEEGDIKVELMGGP<br>TELGRGLVNNKISRK<br>QCVVETVDDGVELTP<br>LGVNPMTMSRAGSE<br>DVEILSRNEKYTLHEG<br>DSFTLCGEQYRFVLQ<br>RPTVTQTTSQTTSQ<br>KDGEKSAKPASRQAS<br>KIEGAEGEGEKTRD<br>GEADINEGDKGEEE<br>GREKQRGEKGEEGK<br>GEEGSPKKGVKRKA<br>SDIATTTTTSSAKKTP<br>QGSAESDSATVPFSA<br>GYDSPEESKAKSKKKP<br>DVKTEEADDVIDDEEL<br>ARKLQEELNKEDEAP<br>KPKTPKSKNSTPEKD<br>AEIARKLQEKYNKESG<br>GGGKKRKQEDDED<br>DGEVNWAAKVKKQK<br>KGKKGGSDDEDEDW<br>NDVGGGGDESDDED<br>YQEEESDSEKNKKNK<br>KKGASPKKPPCKYVK<br>SCYRTNPDHLRDFSH         |
| -              | PpAPLF | P. polycephala  | APLF |                                                                                                                                                                                                                                                                                                                                                                                                                                                                                                                                                 |
| NA             |        | S. cerevisiae   | APLF |                                                                                                                                                                                                                                                                                                                                                                                                                                                                                                                                                 |
|                |        |                 |      | KGGLVQETFVLNQKE<br>HILGRRGDLKVDNPK<br>VSGQHCVLKYDYAQK<br>KAYIIDVSSNGTSLFN<br>KKLEKNKEVELENGDL<br>VNLLQDKSQWIGYIF<br>KLVDNVDSFNKDQQ<br>DTATKNNTDQKQLE<br>QSLEQYKQNEKEQQE<br>QNEQIKKMQNELEER<br>LKKVKEDDEHFEKDQ<br>TCVVCIDLYNPYLMIT<br>PCLHNYCCDCMCELL<br>KNKDIACPQCCEKPI<br>VQKNYQLNNLIEAFIK<br>RNPDKKWQEDVIKK<br>KNESNLLNKDFLDQI<br>NEKLSNKTKKVGIYKR<br>QRSYSDSESSDRNNN<br>RNYSEDEEEFDEDEE<br>EEEYQYNNNQPFQ<br>FGYNYNFIMPAHLNR<br>CVECQNARQDDNFK<br>CSPYQQHIKCINCDK<br>MMPQRNDNNLYPQ<br>NCTICERSFCNLYFKQ<br>DCSSKYNSSSHHLRL<br>FQDIPIPQVLNNNVLS |
| XP_001009833.2 | TtAPLF | T. thermophilus | APLF |                                                                                                                                                                                                                                                                                                                                                                                                                                                                                                                                                 |

|                |         |             |       |                                                                                                                                                                                                                                                                                                                                                                                                                                                                                                                                                   |
|----------------|---------|-------------|-------|---------------------------------------------------------------------------------------------------------------------------------------------------------------------------------------------------------------------------------------------------------------------------------------------------------------------------------------------------------------------------------------------------------------------------------------------------------------------------------------------------------------------------------------------------|
|                |         |             |       | RLLGAETDSSSEFLYK<br>KEWTIGRKKACDLSF<br>PGNKLVSGEHKITV<br>NEESGEVSLDSTN<br>GTVINKLVIRKQTY<br>LKNQDVIVVYRKNE<br>PEQNVAYLYKSLNQ<br>QDSLHDPADTSGSEE<br>AETQLSSQDDQLSY<br>EEPQPTSTSSLFSTPT<br>TSAIPGVQLESAEKS<br>ESLGGHSSTSDASPA<br>RASIPKSNLSTQEQGS<br>LGPPKKRIRTEDHWT<br>TNKNFVPASCPIGAS<br>DESKTPSMKPKDMEE<br>TLTICQELLHDCVSL<br>QPCMHTFCAACYSG<br>WMERSSLCPTCRCPV<br>ERICKNHILNNLVEAY<br>LIQHPEKCRSEEDRCS<br>MDARNKITQDMLQP<br>KVRRSFSDEEGSSEDL<br>LELSDVDSESDISQP<br>YTVCRQCPGFVRHS<br>MQPPPPPPPSDTETS<br>RTQGDAPSTSTNFPT<br>ATQEYVCPSHGSHVI      |
| NP_001089240.1 | XIAPLF  | X. laevis   | APLF  |                                                                                                                                                                                                                                                                                                                                                                                                                                                                                                                                                   |
| NA             |         | Z. mays     | APLF  |                                                                                                                                                                                                                                                                                                                                                                                                                                                                                                                                                   |
|                |         |             |       | DAEQKASNIQVQDLY<br>ATWQTEPGEEKASILL<br>ELPAETTLHTIEIVNA<br>GSTNVEIYVTNSENQ<br>QDEIILLPTAIMMTL<br>GEVNSNTNTNRLRFF<br>GPDKLTGKISDKAWK<br>YIKIVCISFDTSRKPG<br>LARIRLFSAPSDEYIA<br>SSIADNRSSMVSVPS<br>QPTTSTYVPQKYASR<br>SKSFAGPPPTTIAHD<br>TNNKTPNHTNTAN<br>KSNNNNRTNDTNNS<br>PAKSAKRKRVMND<br>DYDDTEGDSAKDQN<br>PRSLTSLHISPHVKKS<br>VPVANRSKSLVFTSFN<br>KILSGVSFVVGIANP<br>ERQELRDKAIEMGAQ<br>YYADWIESATHLICPF<br>TNTPKFILAQKAGGTI<br>VTPAWILDCYKNKVR<br>LPETEYLLAEVKKIDD<br>AGMKSTMGMNMRD<br>WLATFRPKFDKPAN<br>NSTNTTQSQPQPKLT<br>KSLTFVNNARITKDSQ |
| -              | PpXRCC1 | P. polyceph | XRCC1 |                                                                                                                                                                                                                                                                                                                                                                                                                                                                                                                                                   |
|                |         |             |       | DSTHCAENLLKADTY<br>RKWRAAKAGEKTISV<br>VLQLEKEEQIHSVDIG<br>NDGSFVVEVLVGSSA<br>GGAGEQDYEVLLVTS<br>SFMSPSERSGSGNPN<br>RVRMFGPDKLVRAA<br>AEKRWDRVKIVCSQP<br>YSKDSFGLSFVRFHS<br>PPDKDEAEAPSQKVT<br>VTKLGQFRVKEEDES<br>ANSLRPGALFFSRINK<br>TSPVTASDPAGPSYA<br>AATLQASSAASSASP<br>VSRAIGSTSKPQESPK<br>GKRKLDLNQEEKTP<br>SKPPAQLSPSVKRPK<br>LPAPTRTPATAPVPA<br>RAQGAVTGKPRGEG<br>TEPRRPRAGPEELGKI<br>LQGVVVVLSGFQNP<br>RSELRDKALELGA<br>PDWTRDSTHLICAF<br>NTPKYSQVLGLGGRI<br>VRKEWVLDCHRMRR<br>RLPSQRYLMAGPGSS<br>SEEDASHSGSGDE<br>APKLQKQPKTKTKP         |
| NP_006288.2    | HsXRCC1 | H. sapiens  | XRCC1 |                                                                                                                                                                                                                                                                                                                                                                                                                                                                                                                                                   |

|                |         |              |       |                                                                                                                                                                                                                                                                                                                                                                                                                                                                                                                                                     |
|----------------|---------|--------------|-------|-----------------------------------------------------------------------------------------------------------------------------------------------------------------------------------------------------------------------------------------------------------------------------------------------------------------------------------------------------------------------------------------------------------------------------------------------------------------------------------------------------------------------------------------------------|
| XP_041427601.1 | XIXRCC1 | X. laevis    | XRCC1 | DTHTTAENLLKADTY<br>RKWKAARPGEKQSV<br>ILQFEKEEQIHSIDIGN<br>EGSAFVEVLVGRSTSI<br>SEQEVEVLGMSSFM<br>SPSESKNESNLNRTR<br>MFGPDKLVKGAAEK<br>KWDRVKIMCTQPYT<br>KNLAYGISFIRLNSPPE<br>DGSPTAPSPKVTKLG<br>QFMVKEEENSPPSM<br>RPGSLFFNRTSKPQV<br>TPPKTPPATQSYAAA<br>ALQGTAEISSSTEKQI<br>KTPPSNNITKEPSSSK<br>RKFEFNKEPSSHSYAVK<br>KPDVKESPSSTKAKTS<br>SQPAPKKPKVETPPT<br>KKPSPSEKPNQKKSP<br>PSSQPMDLGRILQGT<br>VFVLSGFQNPFRSDL<br>RDKALEMGAKYRPD<br>WTPDSTHLICAFANT<br>PKFSQVKAAGGIIVRK<br>EWWLDCYKRRQLP<br>QKQYLLGTAESSDEE<br>DDSEEDPPKAPQHK<br>PHPDPSRTNHNKKPSP |
| NP_001003988.2 | DrXRCC1 | D. rerio     | XRCC1 | DNTHKADNLLSDTY<br>RKWKAARPGEKQVS<br>VILQLEKEEQIHSIDIG<br>NEGSAFIEVLVGHSTS<br>VKDQDFEVLVTSFF<br>MSPTESRNGTNTNR<br>VRFFGPGQLVKAQS<br>QEKWDRVKIVCSQPY<br>SKTIAYGISFIKLHSP<br>DGNEALVSTPPKLTKL<br>GQFRVKDESPSAGSN<br>VQPGALFFSRDTSK<br>SSTGLKVSPQNERLSY<br>AAAALKTEGSSSTHTP<br>ASDTQQAPVKRKEFE<br>SKERLEASGPPAKKPS<br>SSASAETTPKAKARSS<br>MGTSPPSRASPAQKS<br>SDKRESPKTPESKPK<br>PKPKPKSSESVPFNRI<br>LEGVVVLSGFQNP<br>RADLRDKALALGARY<br>RPDWTPDATHLCAF<br>ANTPKYSQVKAAGGI<br>IVRKEWVMDCHKNK<br>QKISCKRYLMDGAES<br>SSESEAEQDESEETP<br>KAKTPEKKPVTPKKQ    |
| NA             |         | T. thermophi | XRCC1 |                                                                                                                                                                                                                                                                                                                                                                                                                                                                                                                                                     |
| NP_001326839.1 | AtPIE1  | A. thaliana  | SWR1  | ASKSGKSPDNESRA<br>KRQKTLEAPKEPRRP<br>KTHWDHVLEEMAW<br>LSKDFESERKWKLAQ<br>AKKVALRASKGMLD<br>QASREERKLEEEQRL<br>RKVALNISKDMKKF<br>WMKVLYKHQLVRNE<br>KKKKAMDQLEFLLG<br>QTERYSTMLAENLVE<br>PYKQGQNTPSKPLTI<br>ESKSDEERAQIPPEI<br>NSSAGLESGPELDED<br>YDLKSEDETEDEDTI<br>EEDEKHFTKRERQEEL<br>EALQNEVDLPVEELLR<br>RYTSGRVSRVTSVKD<br>ENEDNLTSVSRVTSP<br>VKDENQDNLASVGQ<br>DHGEDKNLAASEET<br>EGNPSVRRSNDYGH<br>LAISETHSHDLEPGM<br>TTASVSKRKEDHTYDF<br>NDEQEDVDFVLANG<br>EEKDDEATLAVEEELA<br>KADNEDHVEEIALLO<br>KESEMPIEVLARYKE<br>DFGGKDISEDESSSF           |

|                |         |               |      |                                                                                                                                                                                                                                                                                                                                                                                                                                                                                                                                                                                                                                                                                                                                                                                                                                                                                                                                                                                                                                                                                                                                                                                                                                                                                                                                                                                                                                                                                                                                                                                                                                                                |
|----------------|---------|---------------|------|----------------------------------------------------------------------------------------------------------------------------------------------------------------------------------------------------------------------------------------------------------------------------------------------------------------------------------------------------------------------------------------------------------------------------------------------------------------------------------------------------------------------------------------------------------------------------------------------------------------------------------------------------------------------------------------------------------------------------------------------------------------------------------------------------------------------------------------------------------------------------------------------------------------------------------------------------------------------------------------------------------------------------------------------------------------------------------------------------------------------------------------------------------------------------------------------------------------------------------------------------------------------------------------------------------------------------------------------------------------------------------------------------------------------------------------------------------------------------------------------------------------------------------------------------------------------------------------------------------------------------------------------------------------|
| XP_020520860.1 | AtrPIE1 | A. trichopoda | SWR1 | KDDETTLAEEEEFAKS<br>EANDPSDEIKLLQQES<br>EMPLEELLAMYKMD<br>TCKDEDDLSASECAST<br>SSEEQVDHSGNKEVK<br>GEDSGPDEDRDGLTV<br>LPDSTEIESFSPLKHS<br>VMQKLKGLKLENRTTE<br>GRESENIADAAAAA<br>RSAQPTGNTFLTTKV<br>RTKFPLLKHPLREYQ<br>HIGLDWLVTMYEKRL<br>NGILADEMGLGKTIM<br>TISLLAHLACEKGIWG<br>PHLUVPTSVMLNWE<br>TEFLKWCAPFKILTYF<br>GTAKERKNKRQGWL<br>KPNSEFHVCTTYRLVI<br>QDAKVFKRKKWKYLI<br>LDEAHLKNNWKSQR<br>WQTLNLFNSKRRILLT<br>GTPQLNDLMELWSL<br>MHFLMPHVQSHQE<br>FKDWFSNPISGMVE<br>GQDRVNKEVVDRLH<br>NVLRPFILRLKRDVE<br>KQLPKKYEHVYICRLS<br>RRQRNLYEDFIASSET<br>RTSSRSVADDQPSTSS<br>AVAPPPSPAIETDED<br>AVVEEKKKKKTSDDL<br>EITPRTPVDRRIPYICS<br>ILLTENRSIRKLVLS<br>GPVRQEDHEEQIARA<br>QRIQPVDQIQRVEQ<br>IILNGSVEDILKDPFPA<br>VMADLTKEPPPTAP<br>PPPIQKTMQPIEVKIE<br>DSEGSNTAQPSVLP5<br>CGGGETNVERAAKRE<br>AHVLARIAELRKNGL<br>WSNSRLPKCVEPERN<br>KTHWDYLLLEVVKWM<br>AVDFRTETNTRKRIAK<br>VIAHAIAKQHRDKQI<br>EIERAAEREIKEKRKM<br>CAGIAKMVRDFWSS<br>TDKVVDIRAKEVLESR<br>LRKARNKHLMFVIGQ<br>VDEMSNIVQEGLVSS<br>SKSPSIASDRDDKDEE<br>FKAPGSDESDEQTI<br>ANAEKSQKKEDVRQE<br>VDALQNEATVDMDD<br>FLYTLPEYLKAYGLT<br>QEDLEEMKREKLEEQ<br>TDESMNIDDNGGDQ<br>IHNAISPTLSEDTVTS<br>NTNPTTTTTPRQTRS<br>SLSLSPSIDNTIALAT<br>ATNSSKKRSRSNSTSK<br>NKSNTGSSSSTNPSP<br>MGSPTLSTSTINLLNT<br>TTTTTTSTIKIELNL<br>QKNKDEFIDINNKRNI<br>LIKELLQQQDNNN<br>NNNNNNNNNNNN<br>NNNNNNNNNNND<br>DIKQQQLSLLLDQ<br>DKLQLINGKVEEFCNS<br>NGFSFYQIFIDNLSSL<br>TSKSLQPTTSSKIPTI<br>PVEKPIIEKPTLPERPK<br>SERLKRQQSLLNSTDS<br>KKLSTSTTTTTTTPT<br>TTTATPPPPSSSSTS<br>TSTSTGTPIGGINTP<br>TNTPSTNNNNNK<br>GICNIKDTPIPFSLAE<br>ETLTDKSTPIKTSQQP<br>QKKQRRESSSTQLNK<br>QITEIQQQQQPIEEI<br>TIPIEQQQMQLLAQV<br>NPQDFKPIPLPPPSAL |
| NP_001255180.1 | CeSSL   | C. elegans    | SWR1 |                                                                                                                                                                                                                                                                                                                                                                                                                                                                                                                                                                                                                                                                                                                                                                                                                                                                                                                                                                                                                                                                                                                                                                                                                                                                                                                                                                                                                                                                                                                                                                                                                                                                |
| XP_647182.1    | DdSWR1  | D. discoideum | SWR1 |                                                                                                                                                                                                                                                                                                                                                                                                                                                                                                                                                                                                                                                                                                                                                                                                                                                                                                                                                                                                                                                                                                                                                                                                                                                                                                                                                                                                                                                                                                                                                                                                                                                                |

|                |          |                 |      |                                                                                                                                                                                                                                                                                                                                                                                                                                                                                                                                                    |
|----------------|----------|-----------------|------|----------------------------------------------------------------------------------------------------------------------------------------------------------------------------------------------------------------------------------------------------------------------------------------------------------------------------------------------------------------------------------------------------------------------------------------------------------------------------------------------------------------------------------------------------|
|                |          |                 |      | SPAPPAVPDRVTPHS<br>TEISVAPANSTSTTVR<br>AAGSVGAALPATRH<br>HQHIATQVKGIASSSS<br>KQKQLASQQLPVPL<br>SPLPQQQQQTAEAT<br>AAAAAPAHSNVSVSS<br>STIEASVLPQAKRQR<br>LDDNEDRTSAASIVG<br>PAESSNIVSLLPASV<br>ASSSEVGGLSSTALQD<br>LNALKKRILQQLQIL<br>RNLKERHLENVSEYFY<br>LQNGGSMMDYPAW<br>RKKTPTPQFISYSNAN<br>RIDQLIHEDKPSTAA<br>AAAAAQNQKYTTQQT<br>DSVESLVSIGTGAT<br>KGAPLDGNISNSTVK<br>TNTQSQVPSKIGSFTE<br>STPAATESNSSTVPG<br>TATSGAATSTSATSAE<br>ASGNVLAVEAEIKIPA<br>VGATPVAISTKLPAAV<br>VQLTQGGGTPLLPCN<br>TSAGSTALRRPQGQN<br>NASSGSAASGGGG<br>SLTPTPLYTGNGPAAL |
| NP_524833.2    | DmDomino | D. melanogaster | SWR1 | QHHGDTGGVSAPFQ<br>TAKEPLPPETIKLDYK<br>NVSGKATSGESPSAP<br>KTEVTPSVKGAVKST<br>DKDMEHPKPTPLFET<br>NQTAASSVLQKQSTT<br>NSATQLCKFDSKETM<br>EDVTRDLLKTSKEDDI<br>SETLSAGGTQKGISG<br>NSICSGYSSKQGGQH<br>ITPNRGNTPNDSKD<br>GSCYLTECSQTQTS<br>TQKTSTLPKTPGIPTL<br>VENIQCVQELSSQYL<br>HINPKMVTLSKETSTR<br>GDLYCNVAAKEVLCN<br>VSVDEPKLSGHGTCT<br>DTAHVSIMSERSQV<br>MCGGSSDVILKQND<br>ANQIEISMSSNHQQ<br>DGSILLTHAENCVTSE<br>GLESDQPNLSDCLVQ<br>QLQESIPDHLKLSQIQ<br>ICLNNTPDIVNEEERQ<br>EMNAEALSAVEVKDL<br>IDVGILMQPDMEDT<br>WLVVSEIDGQPEHAE<br>MEVSDESLVQCPESEQ  |
| XP_005156368.1 | DrSRCAP  | D. rerio        | SWR1 | LQRSKSFTGSEAEQ<br>QQQQSQQPQQQQ<br>QQPVPTQQQSANA<br>NLPQSPVTSFAPSASP<br>SAPQSPNYQIIMSR<br>PVTGQNMNITLQNV<br>GPMVTGNQQTILTS<br>PLQSPASPGFQHQ<br>QQWRFEFGSSSVIQV<br>TSPLQTMQPSQPT<br>QHSPVPLQAVPRPN<br>APGSALGVCQSPTR<br>FVEANIMVRQINLSS<br>PPGSGHFVYQDGAG<br>LATGTVHLTSPGTPG<br>AVRERRLSQPHSQPG<br>SSTVHHKALPSQVPT<br>LGSPGPITTTNLPPQI<br>SSIIQGQLARPTMFEK<br>TSQSVVGVANSAAT<br>FGVSTIPPSSPSRSN<br>SSQGLSSQSLTPSM<br>KKMQPKKLEEIAPSN<br>PEVAQLRKQCLEHHG<br>KKMEGLEVFKEYLIE<br>LFFLQHLQGNMMDY<br>IAFKKKPCVPLFTYLR<br>QNDLDLEDEEEEEEQ                  |
| XP_009302483.1 | Dr-p400  | D. rerio        | SWR1 |                                                                                                                                                                                                                                                                                                                                                                                                                                                                                                                                                    |

|                |         |             |      |                                                                                                                                                                                                                                                                                                                                                                                                                                                                                                                                         |
|----------------|---------|-------------|------|-----------------------------------------------------------------------------------------------------------------------------------------------------------------------------------------------------------------------------------------------------------------------------------------------------------------------------------------------------------------------------------------------------------------------------------------------------------------------------------------------------------------------------------------|
| NP_006653.2    | HsSRCAP | H. sapiens  | SWR1 | QTQMVSDGMTGSN<br>PVSPASSSSPASSGAG<br>GISPQHIAQDSSLG<br>PPGPPDGATVPLEGF<br>SLSQAADLANKGPK<br>WEKSHAEIAEQAKHE<br>AEIETRIAE LRKEGFW<br>SLKRLPKVPEPPRPGK<br>HWDYLCEEMQWLS<br>ADFAQERRWKRGVA<br>RKVVRMVIRHHEEQ<br>RQKEERARREEQAKL<br>RRIASTMAKDVRQF<br>WSNVEKVVQFKQQS<br>RLEEKRKALDLHDF<br>IVGQTEKYSDLLSQSL<br>NQPLTSSKAGSSPCL<br>GSSSAASSPPPASRL<br>DDEGDGFQEQEED<br>EDEETIEVEEQQEG<br>NDAEAQRREIELLRRE<br>GELPLEELLRLPPQLL<br>EGPSSPSQTPSSHDS<br>DTRDGPEEGAEIEPP<br>QVLEIKPPPSAVTQR<br>NKQPWHPDEDEEF<br>TANEEAEDEEDTIAA<br>EEQLEGEVDHAMELS |
| NP_056224.3    | Hs-p400 | H. sapiens  | SWR1 | LQSRACPGSEGEQ<br>PAHPNPPSPAAPFA<br>PSASPSAPQSPSYQIQ<br>QLMNRS PATGQNVN<br>ITLQSVGPVVGNNQ<br>QITLAPLPSPSPSGF<br>QFSAQPRRFEHGSPS<br>YIQVTPSLQQVQTQ<br>SPTQSPSPGQALQ<br>NVRAGAPGPGGLCS<br>SSPTGGFVDASVLR<br>QISLSPSSGGHVFQD<br>GSGLTQIAQGAQVQL<br>QHPGTPITVRERRPS<br>QPHTQSGGTIHLGP<br>QSPAAAGGAGLQPL<br>ASPSHITTANLPPQIS<br>SIHQGLVQQQVLQ<br>GPPPLRPLGFERTPG<br>VLLPGAGGAAGFGM<br>TSPPPPTSPSRTAVPP<br>GLSSLTSLVGNMG<br>KKVPKLEEIPASPE<br>MAQMRKQCLDYHY<br>QEMQALKEVFKEYLIE<br>LFFLQHFQGNMMDF<br>LAFKKKHYPALQAYLR<br>QNDLDIEEEEEEEEE       |
| NP_001291195.1 | MmSRCAP | M. musculus | SWR1 | QTQMVSDGMTGSN<br>PVSPASSSSPDSSGA<br>GGISPQHIAQDSSLD<br>GPPGPQDGTTPLEG<br>FSLSHAADLVNRGQK<br>WEKSHAEIAEQAKHE<br>AEIETRIAE LRKEGFW<br>SLKRLPKVPEPPRPGK<br>HWDYLCEEMQWLS<br>ADFAQERRWKRGVA<br>RKVVRMVIRHHEEQ<br>RQKEERARREEQAKL<br>RRIASTMAKDVRQF<br>WSNVEKVVQFKQQS<br>RLEEKRKALDLHDF<br>IVGQTEKYSDLLSQSL<br>NQPPASSKAGSSPCL<br>GSSSAASSPPPVSRRL<br>DDEGDGFQEQEED<br>DDEETIEVEEQQEGN<br>DAETQRREIELLRHEG<br>ELPLEELLRLPPQLLG<br>GPFSPSQTPSHSDT<br>QDGPENIEEESQD<br>LEVHPSSAVTQCNC<br>QRWHPDEDEEFT<br>NEDEAEDEEDTIAAEE<br>QLEGEVDHAMELSEL   |

|                |         |                |      |                                                                                                                                                                                                                                                                                                                                                                                                                                                                                                                                              |
|----------------|---------|----------------|------|----------------------------------------------------------------------------------------------------------------------------------------------------------------------------------------------------------------------------------------------------------------------------------------------------------------------------------------------------------------------------------------------------------------------------------------------------------------------------------------------------------------------------------------------|
|                |         |                |      | LQRRSR5FTGSEEEQPA<br>HPNLPPSPAAPFAPS<br>ASPSAPQSPGYQIQQ<br>LMSRSPVAGQNVNIT<br>LQNVGPVVGNNQOI<br>TLAPLPLNPTSPGFQ<br>FGAQQRFFEHGSPSY<br>IQVTSPPMSQQVQTQ<br>SPTQSPSPGPGQTLQN<br>VRAGAPGPGLGICSN<br>SPTGGFVDASVLRQ<br>ISLSPSSGGHFVFQEA<br>PGLTQMAQGAQVQ<br>LQHS GAPITVRERRLS<br>QPHAQSGGTIHHLG<br>POSPAAGGTGLQPL<br>ASPNHITTASLPPQIS<br>SIQQQLIQQQQVL<br>QGQPMNRS LGFERT<br>PGVLLPGVGGPSAFG<br>MTSPPPPTSPSRTTM<br>PPGLSSVPLTSMGSS<br>GMKKVPKKLEEIPPA<br>SQEMAQMRKCLDY<br>HYKEMEALKEVFKEYL<br>IELFFLQHLQGNMM<br>DFLAFKKHYAPLQA<br>YLRQNDLDIEEEEE  |
| NP_083613.2    | Mm-p400 | M. musculus    | SWR1 | GRRNRAKPEPSSVES<br>GPPLVKDVRGLTPVK<br>KVSPPTSDQAVDF<br>VAQVKKPHAGRGRP<br>RKVVGVPPKQGVKSLS<br>DVVTKKMPATRSSA<br>GKPVAFVADGREVA<br>KDSISIEETVPEGSSLK<br>TLVRSQDKVPVRVRI<br>VGPFSSNGGSKHGRD<br>ESFGSLSSGSQKSRG<br>QIVRQEAQRAADDET<br>SDGLQPNQRKSDGL<br>AARDEKISCRREIERS<br>IHEKKVAEEQVIDKRE<br>EGQTVPEKKRTAHFH<br>YGRKDAVEQVIDKRN<br>QWLPVTERKMGGKT<br>HHDIHETGEQVIHKR<br>GEGRYIFEMSAGGKS<br>QRRIDGEHSTRGKH<br>PSASEGTLASRRRFM<br>ALRRRQREDLLSRA<br>DEILLKQEFLEANKDK<br>KVQPKSKKPARPKTH<br>WDFVIEEMTWLAKD<br>FERERKWKLTQAKKI<br>VLRVNRSKLDVVARE |
| XP_024369996.1 | PpaPIE1 | P. patens      | SWR1 | GNKRQKGVAEPPHID<br>TRNANTKRPSRTSEQ<br>ASPIPKRVRGSGVPE<br>SPSVEAIDVSQSEVA<br>PKAGVETDINIPAI<br>YEVEKRLELIKQLTEQ<br>KENELKELAYLEAGN<br>NLMDYEAGFTGKI<br>MTAKEEPPGENVAVG<br>AEVPNKKGPGRPAK<br>DPNSQSRRRSTVGQS<br>PVQGESLQAQSPIPQ<br>TPSAPQTPVQPSQPT<br>PQTPTQPTQJTAQE<br>AKPAVVFHQPLQVPL<br>PSIFTVPPPTSEQDRE<br>RALKDAAIIRRVGELQ<br>RTGMWSLKRIPKAVE<br>PPRAKVHWDHVLAE<br>MGWLANDFKQERK<br>WKMALAKKVSQV<br>MKYHQMQUETREQR<br>KRKEEEHQIRKIASGI<br>AREVKKFWQIEKV<br>MFKEQTKLDEKKKEV<br>LDKHLDFLVGQTEKYF<br>EMIANDLKQPEGGA<br>QKDAPTTEQSTEEKA       |
| -              | PpSWR1  | P. polycephala | SWR1 |                                                                                                                                                                                                                                                                                                                                                                                                                                                                                                                                              |

|                |        |                 |      |                                                                                                                                                                                                                                                                                                                                                                                                                                                                                                                                                                                                                                                                                                                                                                                                                                                                                                                                                                                                                                                                                                                                                                                                                                                                                                                                                                                                                                                                                                                                                                                                                                                                     |
|----------------|--------|-----------------|------|---------------------------------------------------------------------------------------------------------------------------------------------------------------------------------------------------------------------------------------------------------------------------------------------------------------------------------------------------------------------------------------------------------------------------------------------------------------------------------------------------------------------------------------------------------------------------------------------------------------------------------------------------------------------------------------------------------------------------------------------------------------------------------------------------------------------------------------------------------------------------------------------------------------------------------------------------------------------------------------------------------------------------------------------------------------------------------------------------------------------------------------------------------------------------------------------------------------------------------------------------------------------------------------------------------------------------------------------------------------------------------------------------------------------------------------------------------------------------------------------------------------------------------------------------------------------------------------------------------------------------------------------------------------------|
|                |        |                 |      | GGEQDLADLKFRYDL<br>LTNELFHLREFVSLVD<br>YDPTHFNDSSEFQKFL<br>RETHLSLEERGEKFTD<br>DVAKKGTNGDLTRRR<br>RNLRTSTVVSSETTNE<br>KKGDIELKLESIAPLVR<br>NKCEELKYKLSDHSN<br>RKSIVPQKRPIQHLKK<br>REAAKSLFKSERKEN<br>PLPLHEHIAEERYDHI<br>AKVEEPSEAFKICPS<br>DDSSFENTSEHYSDN<br>FYFTTSSEEDIKKRG<br>RKKKKPRIKLVVHPPK<br>QTITNPLHVVKPGYES<br>LHEYIASFKSLEDDLTL<br>EEYNKYIDEQRLLSR<br>LKKGIENGALKYDKET<br>DSLQPTSKEIKTIITYK<br>PDPISYFYKQDQLQIH<br>TDHLINQGIHMSKLF<br>RSSTKARIARAKKVSQ<br>MIEQHFKHVAGAE<br>RKAKEERHHKSLARF<br>AVQAVKKRWNNMAE<br>KAYRILRKDEEEQLKRI<br>EGKQHLKMLEKSTQ<br>YFFDCLFVSFRKAWS<br>CVNFIYICYQIYYGAE<br>GNLFSYTKIFRRKK<br>QIGSQLKKIQEQVQK<br>QMNSTEHDGQGLNS<br>SIRNYKNNSDISYEQN<br>STNLSKNQDSYKDSIK<br>KILETMKTESEKQKK<br>YDENLRKIDQWRQE<br>MKINFEISDDEMND<br>DSYNFDFPENQLRQ<br>SDLANQKYNQLIEEQI<br>DKLLQSSIIDKELDIVK<br>QRIHNAHSSSTFLESK<br>KAFLKNKRKNLFKNY<br>VKTVNQNNQNAEKI<br>QNWQNGNNNLSTG<br>VSSTSSQVSSSNVQT<br>LEQIJKESMKLQSSKN<br>SKLIEHQLMRLTQAIE<br>SPRHDDFIENHIFKKF<br>KVTKDKLQTRTQQVI<br>GYKPSDFKIKRYRFN<br>PONMPFCGSNFDEA<br>KKALVPQYHAVYND<br>QSDPFNRLLSKPIIPRI<br>GVNKKQLQMKPKK<br>NVNEGQPEPTTSPL<br>KMTGSNPVSPGSSAE<br>LSPFDLSGEMGDTAC<br>GSPTYDGMGDSQQD<br>NSGGQKWDGQSEIA<br>EQAKHEAEIENRIAE<br>RKEGFWTPRRLSKVP<br>EPTRPKVLWDYLCEE<br>MQWLSADFAQERR<br>WKRGVARKLVRMVV<br>RHHEELKQKEERARR<br>EEQAKLRRATTIAKE<br>VRQFWSNVEKVQF<br>KQQRLEEKKKALD<br>LQLDFIVGQTEKYSDL<br>LSQSLNETLLPVSKSS<br>SCIGSSQGGSLRTSPT<br>PSVHHNYDGDPLPH<br>DEEDDEETIEIERQD<br>GNDAESQRLEIELKK<br>ESELPLEELLES LGPNF<br>LQDVPDQDMQESD<br>SPLLPQVFEEEDGEFT<br>VNEEEGEDEETIEAE<br>EALEGQQDHAEELSE<br>LAKEGELSLEELLQKYS<br>MVKTDEEIFDPSEES<br>QQSDQLSDSSHCHENS<br>DSDSEGVFLVKPED |
| NP_010621.1    | ScSWR1 | S. cerevisiae   | SWR1 |                                                                                                                                                                                                                                                                                                                                                                                                                                                                                                                                                                                                                                                                                                                                                                                                                                                                                                                                                                                                                                                                                                                                                                                                                                                                                                                                                                                                                                                                                                                                                                                                                                                                     |
| XP_001018403.2 | TtSWR1 | T. thermophilus | SWR1 |                                                                                                                                                                                                                                                                                                                                                                                                                                                                                                                                                                                                                                                                                                                                                                                                                                                                                                                                                                                                                                                                                                                                                                                                                                                                                                                                                                                                                                                                                                                                                                                                                                                                     |
| XP_018092196.1 | XISRCA | X. laevis       | SWR1 |                                                                                                                                                                                                                                                                                                                                                                                                                                                                                                                                                                                                                                                                                                                                                                                                                                                                                                                                                                                                                                                                                                                                                                                                                                                                                                                                                                                                                                                                                                                                                                                                                                                                     |



|                |         |             |      |                                                                                                                                                                                                                                                                                                                                                                                                                                                                                                                                               |
|----------------|---------|-------------|------|-----------------------------------------------------------------------------------------------------------------------------------------------------------------------------------------------------------------------------------------------------------------------------------------------------------------------------------------------------------------------------------------------------------------------------------------------------------------------------------------------------------------------------------------------|
|                |         |             |      | PSSGNDGDQQRQK<br>TTPPSPAQSFTPTVSS<br>PAPQSPSYQIQHLIM<br>SRNSMPGQNVNITL<br>QNVGPVVPQSQQITL<br>TSLPITSPASPGFQFN<br>TQPRRFEHGSPSYIQ<br>VTSVVSQQVQTQNS<br>TQPNTPVPIQALQGV<br>TGTSSASLGMCSQSP<br>TRGFVDAGLLVRQLS<br>LGPSNTGTFVIEGGS<br>GITQIAQSAQVHLSP<br>GTPTVPAHNLLHSSS<br>PTVGPVHQFGSQNS<br>VTGSVNVQSPSTPSQ<br>LTTNLSQQLSSIIQGG<br>LIQQQQQQVLHGG<br>QVSRTFSDGTSSGM<br>IAGVTGTSAFGITSAA<br>TPTSPSRVTGPQARS<br>SLPLTTTLGTTLRQA<br>RKLEIIPATQEDALL<br>RKLCFDYHHQMQA<br>LKETYTEYLIEFLQH<br>CQGNMMDFLPFKKK<br>RNIIYQFLRQNDLD<br>MEVDEEEADKNSRA       |
| XP_018117870.1 | XL-p400 | X. laevis   | SWR1 | RARRQKALEAPREPR<br>RPKVHWDHVLAEML<br>WLAKFDSERKWKLS<br>MAKKIAQRANKSIVD<br>QAAKGERKQKEEHR<br>MRKVAVNISKDVKKF<br>WIKIEKLASSFLSSNVI<br>VNCOTTLDISFLKKT<br>YFATSLSSNMVGKQ<br>VVYKHQLELEERKKK<br>ALDKQLDFLLGQTER<br>YSTMLAENLVDMPYS<br>QNLETETSQINQPSH<br>QEVVAEENLNATIPD<br>DLDNMEVDDDYGSS<br>LDEEPEDEHTIDEDE<br>AQJTEAERNEELAAL<br>AEADLPDLVILKMYT<br>TKVTPNQANGCDHE<br>LAHSSSDEGNSSEEV<br>DDGHSYAEFVKKNH<br>VHLLLSYMWVKVMEI<br>FLLSMIRHVLVVVVY<br>GFIYSLSHEDDYIAAE<br>EVKDEATLSEEEQLA<br>KKEDPDHLEIKLLQK<br>ESEIPLEELLARYREDG<br>CADHETAELNSPHF |
| AQK73705.1     | ZmPIE1  | Z. mays     | SWR1 | MEIDEEPMVFLDRT<br>TRATRGKRMTKLLDD<br>EVEEDEQFWNQEAL<br>KEEEHDEYEAEREV<br>ADEFDSDFNDEPEP<br>DAVAVNEKLRDLPK<br>KRLIYPGKTASKKKK<br>KTKVVSQLEIYPGDEK<br>PGEELGNKEQEEKEE<br>NEAQEDMEGEKVIRK<br>STRTSVVVRQAERDA<br>LRAAIQATTKPIQRKK<br>VGEEKRMTQEEMLLE<br>AAQTEIMNLRNLERV<br>LAREEEVKKAIVHKA<br>VYKGPQIRYHSKOGC<br>NYLEFCNGASFNSLS<br>TKSVYPPEKAVCVITG<br>LPAKYRDPKTGLPYAT<br>RDAFKAIRERFMDEH<br>DGLRKKMEMGDLFD<br>TLVAKGFATKQKRTKI<br>PKSNKSFSLRSSARFL<br>SSESEEESEEDSD                                                                            |
| NP_181212.2    | AtSWC2  | A. thaliana | SWC2 |                                                                                                                                                                                                                                                                                                                                                                                                                                                                                                                                               |

|                |         |               |      |                                                                                                                                                                                                                                                                                                                                                                                                                                                                                                                                                           |
|----------------|---------|---------------|------|-----------------------------------------------------------------------------------------------------------------------------------------------------------------------------------------------------------------------------------------------------------------------------------------------------------------------------------------------------------------------------------------------------------------------------------------------------------------------------------------------------------------------------------------------------------|
|                |         |               |      | MDPMASAEQEV<br>LLPRSARKTRGRMS<br>KLLDEEIEDELFWNQ<br>DALKEEELDAEYEEA<br>EVADEFDSDFDEDEP<br>EPDDEEAKNDGDERE<br>RVKKKLIFPGKKAVKK<br>KSKKKVLAAPKAENS<br>SETPEPMQLEHQDIP<br>DDLEGERAVRKSTRT<br>SVIVRQAERDAIKAAL<br>QATMRPVKRKKEGE<br>EKRMTOEEMLEAA<br>QTEIVNLNLERVLAR<br>EEEVKKRAVVHKAVY<br>NGPQIRFLSRNGKFTL<br>EFNNGATFESAIAATP<br>ASYAEPAVCAITSMP<br>AKYRDPKTGLLYATKE<br>AFKIIRERFYKEVSERE<br>KERPDMGSLFALISGE<br>GFSMKRRKSCMENR<br>NQHLDYRRQYIF                                                                                                             |
| XP_011620654.1 | AtrSWC2 | A. trichopoda | SWC2 |                                                                                                                                                                                                                                                                                                                                                                                                                                                                                                                                                           |
|                |         |               |      | MAPRRSSRAVKNK<br>KESREGSSNDEHSNE<br>SSTRSSKSRDGSHHN<br>EEEGETSKASDPQINE<br>ESEDETSNASDEQEE<br>NDDTSSDEDAEPIVL<br>NVTERARRATAGNK<br>MAALLASADHEDEFY<br>KTAYGGFEENNEVDK<br>EFKSPVHSDDDDEVDS<br>DFDKPEEEDEPASGG<br>EEDGRPRRKRKFNE<br>PKRGMTADDILAKNK<br>KWAMARLAGNIVAA<br>NSVDDKTQAAMLKE<br>AEKTEKMNIESLKYYE<br>AFELERKKREKNTVR<br>VFPPGPREQKMTES<br>GTTITLSEIKTFKCERP<br>RERNLCAVTGRPARY<br>LDPVTRLPYSTAYAFK<br>VIRDYHKKHLSIRGN<br>DEVTTYLKSALKALPSP<br>QISPRVPLTTGPITSG<br>PLVASSAGLTVMAT<br>TSSAPKTTTH                                                    |
| NP_492505.1    | CeVP572 | C. elegans    | SWC2 |                                                                                                                                                                                                                                                                                                                                                                                                                                                                                                                                                           |
|                |         |               |      | LSTADEELWQQLKE<br>SDNEKEDPDYIVNSD<br>EEEEEDIVSDAASD<br>EEEEEGGGDDDETETK<br>STKKSCKSKYKDPKSK<br>KSISRRKKSSSDTDSK<br>STMETELEKHLDNNT<br>STTTTNDNTPNKRKR<br>KEPSPPKTPNSEPTSP<br>STRSSQSSAIEQLQ<br>KSQPQTLTKNKKLV<br>DDDDEEDESTTTTT<br>TTATTSRRSTRNSES<br>IKTTETTTTRKGGKNS<br>KSDKNDEISSTPSTSI<br>DGEGLSKLDISTYGL<br>TQEELLECKETEINT<br>ESLNHLQEEEDKKK<br>VFHPKKALTGPRRIYR<br>STPEQTTITFTDSLIPY<br>CLTNQPQINNITSSG<br>NEKSKKVRASRKSLD<br>PPPIVDITSTTTTTTA<br>ATTATINPTTATVTT<br>ETNPSTTSTQEPIVEQ<br>KDKGDTNRTENSENE<br>IKKNIELCVITGLPAKY<br>IDPESKKPFANLEAYKI |
| XP_629104.1    | DdYL1   | D. discoideum | SWC2 |                                                                                                                                                                                                                                                                                                                                                                                                                                                                                                                                                           |

|                |         |                 |      |                                                                                                                                                                                                                                                                                                                                                                                                                                                                                                                                                                                                                                                                                                                                                                                                                                                                                                                                                     |
|----------------|---------|-----------------|------|-----------------------------------------------------------------------------------------------------------------------------------------------------------------------------------------------------------------------------------------------------------------------------------------------------------------------------------------------------------------------------------------------------------------------------------------------------------------------------------------------------------------------------------------------------------------------------------------------------------------------------------------------------------------------------------------------------------------------------------------------------------------------------------------------------------------------------------------------------------------------------------------------------------------------------------------------------|
| NP_001285823.1 | DmYL1   | D. melanogaster | SWC2 | MAASRSRRNNAGNK<br>IAHLLNEEEEDDFYKT<br>SYGGFQEEDEEDKEYE<br>QKDEEEEDVVDSDFSI<br>DENDEPVSDQEEAPE<br>KKRKRGVVNTKAYKE<br>TKPAVKKETKATPAL<br>HKKRPGGGVTKRPRR<br>PRFTVLDSGRKSIRTS<br>TAIKTQATKIRLKELD<br>DARKRKKKVRVEDY<br>MPTQEELLEAKITEE<br>ENTKSLEKFQKMELE<br>KKKSRTPTKRTFSGPTI<br>RYHSLTMPAMRKPT<br>RGANPAVDKDLAG<br>KCERTFVTIENDFNCK<br>VFQSLFRHKAPPKAS<br>NGICPITRLPARYFDPI<br>TQQPYYSIQAFKILRE<br>AAYMQLQEQGGGSE<br>QPELAKWLEWRKLV<br>KENRLKASAAASKNG<br>DN                                                                                                                                                                                                                                                                                                                                                                                                                                                                                         |
| NP_001076413.1 | DrVps72 | D. rerio        | SWC2 | MSLANSREQRSTAG<br>NRMSKLLDAEEDEF<br>YKTTYGGFNDESGDD<br>EYHGDHSDTEDEVDS<br>DFDIDEGDEPDSGQE<br>EDAPKRKSRVVTKAY<br>KEPLKVSKPKVKRVSE<br>ELKPERPRVERRTVRD<br>ELQDLGDIRKSVRKST<br>SEHTRKTNERLQERQ<br>QEAPRRKRGAQSERV<br>LTQDELLDEAKLTAE<br>NLRSLENYERLEADKK<br>KQVHKRRFEGPMIR<br>YHSVLMPLLPDTHLK<br>EENVDEGLDQDTP<br>QATPTSSSTQGAGS<br>LCSRTYITFSDDEAFSS<br>AFPSAARCTPTHVPQ<br>EVCPTVTHKALYRDP<br>VTDIPYANARAFRIIR<br>EAYQKYIAAHGFPNA<br>SGSFSANTDASDSPA<br>NLKSARPKAVLKQSA<br>AAT                                                                                                                                                                                                                                                                                                                                                                                                                                                                        |
| NP_001258016.1 | HsYL1   | H. sapiens      | SWC2 | MSLAGGRAPRKTAG<br>NRLSGLLEAEEDEFY<br>QTTYGGFTEESGDDE<br>YQGDQSDTEDEVDS<br>DFDIDEGDEPSSDGE<br>AEEPRRRRVVTKAY<br>KEPLKSLRPRKVNTPA<br>GSSQKAREEKALLPLE<br>LQDDGSDSRKSMRQ<br>STAETHRTQTLRVQE<br>RQGQSRRRKGPHCE<br>RPLTQEELLREAKITEE<br>LNLSLETYERLEADK<br>KKQVHKRKCPCPIIT<br>YHSVTVPLVGEPGPK<br>EENVDIEGLDPAPSVS<br>ALTPHAGTGPVNPPA<br>RCSRTFITFSDATFE<br>EWFPPQGRPPKVPVR<br>EVCPTVTHKALYRDP<br>VTDIPYATARAFKIIRE<br>AYKKYITAHGLPPTAS<br>ALGPGPPPPPEPLPGS<br>GPRALRQKIVIK<br>MSLAGGRAPRKTAG<br>NRLSGLLEAEEDEFY<br>QTTYGGFTEESGDDE<br>YQGDQSDTEDEVDS<br>DFDIDEGDEPSSDGE<br>AEEPRRRRVVTKAY<br>KEPLKSLRPRKVSTPA<br>SSSQKAREEKTLLPLEL<br>QDDGSDSRKSMRQS<br>TAEHTRQTLRVQER<br>QGQSRRRKGPHCER<br>PLTQEELLREAKITEEL<br>NLRSLETYERLEADKK<br>KQVHKRKCPCPIITY<br>HSVTVPLVGEPGPK<br>ENVDVEGLDPAPTAS<br>ALAPHAGTGTGAAA<br>ATPPAHCSTRTITFSD<br>DATFEWFPQGRPP<br>KVPVREVCPTVTHRPA<br>LYRDPVTDIPYATARA<br>FKIIREAYKKYITAHGL<br>PPTASALGPGPPPE<br>PLPGSGPRALRQKIVI<br>K |
| NP_033362.2    | MmYL1   | M. musculus     | SWC2 |                                                                                                                                                                                                                                                                                                                                                                                                                                                                                                                                                                                                                                                                                                                                                                                                                                                                                                                                                     |

|                |         |               |      |                                                                                                                                                                                                                                                                                                                                                                                                                                                                                                                                                       |
|----------------|---------|---------------|------|-------------------------------------------------------------------------------------------------------------------------------------------------------------------------------------------------------------------------------------------------------------------------------------------------------------------------------------------------------------------------------------------------------------------------------------------------------------------------------------------------------------------------------------------------------|
| XP_024394407.1 | PpaSWC2 | P. patens     | SWC2 | RLSKLLDEEIEADEEF<br>WNQDAFKEDVADDE<br>YEEEQELADEFDSDF<br>NDDEESGDDEEVEEK<br>ERRPKKKQLPPGGKK<br>PLKKGPSGSTKKKGV<br>SFLEAAAAADAGET<br>PLPTLKTPTQATRPSP<br>EKEDGETEEGEKLLRK<br>STRTSVIVQAEREA<br>QRAIQQALPKIVKKK<br>REGEDRKMTQEEML<br>LEAAQTEIQNRQSLET<br>LLAREEEVKRKAIINKE<br>VYSGPLIRFYSKEGIN<br>VLEFVKMPEVPEVIN<br>AKAPPTCTFTFRNPKQ<br>PVCVVTGLLAKYRDP<br>KSGFPYATKEAFIIRE<br>RQRKGEDISRKDSLEK<br>VQRKRTKVEREKFAP<br>GTRTGAVKIKYKKPD<br>KPVETKFQNSPKPQS<br>QPSVENRASGGAGP<br>SGATSSGLTLDKPE<br>NSNKVGEFEDKLDHT<br>STPAPAPAPLPTPMV<br>EANEADFMLEDLGV5  |
| -              | PpSWC2  | P. polyceph   | SWC2 | MSTRSLPSRSTRGKR<br>MNALVGDDALVDEE<br>FWKMDMFKEDEED<br>DEYKSEAEEDDIIDAD<br>FDNPEEAEESEVEVA<br>KEKKEKKRMAYVDPK<br>AKKGPKRRKIQDKAK<br>ALDAELLKGPESDVEV<br>IIMDEEPNEEKGEAPK<br>AEPKKGRGRRKKTTP<br>KALEIPEGEGADAAS<br>PPSTPGSVNTPKSTR<br>KSTRAVAIQRAEQRE<br>KEREETEKKRSQRSRK<br>RSPVVRRITQEELLE<br>EAKMTEIYNTESLKYIL<br>SMEEKKKIKEAPTIV<br>GPAIKYYSKDGTVCVC<br>FDELDPVLASAPPTPP<br>SREICPITGLPAKYKDP<br>KTGICYANLDAFKTLR<br>TKLLQQEEAETNLKIA<br>QLTALLQESKRKKDQ<br>LQNTPTGVLV                                                                              |
| NP_010773.4    | ScVps72 | S. cerevisiae | SWC2 | FIIQTRSRRSNAGNKL<br>QKLLLEQLRDIESTKR<br>QISSYKNGNDDEEDEI<br>GLLFQEDDEDEDFEM<br>MAKDDDDDEEEKED<br>ETQSIRKEPSQASSEQ<br>AADDLMFSSSESED5<br>SNENDEDAEEKEIRR<br>QELLSRKKRNKRLQK<br>GPVVIKKQKPKPSG<br>EAIIPRSHHTHEQLNA<br>ETLLLNTRRTSKRSSV<br>MENTMKVYEKLSKAE<br>KKRKIIQERIRKHKEQ<br>ESQHMLTQEERLRIA<br>KETEKLNILSLDKFKEQ<br>EVWKKENRLALQKR<br>QKQKFQPNETILQFLS<br>TAWLMTPEMELEDR<br>KYWQEQNLNRDKKK<br>KKYPRPKKNLNLGK<br>QDASDDKKRESEESIK<br>NDGDVNSLGENSSSV<br>HNQKRIETSTNDTV<br>EGESSPDAAVSRVNS<br>DELKPTALPDVTLDAI<br>ANKQSTVDEAPNSQ<br>PQKNIITNEQKITNVG |

|                |          |                 |       |                                                                                                                                                                                                                                                                                                                                                                                                                                                                                                                          |
|----------------|----------|-----------------|-------|--------------------------------------------------------------------------------------------------------------------------------------------------------------------------------------------------------------------------------------------------------------------------------------------------------------------------------------------------------------------------------------------------------------------------------------------------------------------------------------------------------------------------|
|                |          |                 |       | KNEEIYNSDQDDQD<br>QTPONKSHSNNSNQ<br>VGAQSKKGAVQDKS<br>AKNSKVTASKGNQKK<br>KSQEVDSKAPKKGKA<br>ISKGKTNNKKGDKGG<br>AASKGGKKKVQKG<br>KKGEKAPVKGSA TKK<br>KGGAQDKKKADNSA<br>LKKTAKISQGA EIIED<br>EKEEVFNDESATPP<br>QYSQTNATSYQSDNI<br>SKLKKKPAKASNKK<br>TQQTAAASKLKTQKE<br>EQGEKSSSLKAFSSIIK<br>DKKNGKNVPFQPT<br>NKESEEIEIEPETDEQE<br>SDPNQLKKLGKSDL<br>NTEHQNGGNQVKD<br>DKKGQSESLKNRSK<br>VLVDSKKPNSKLYKN<br>DNGHEQSTTSKGSKV<br>SAIKNIRKDSLDMELD<br>NTLENEEDEDILSGS<br>EDSENSQNSDNITN<br>KKQLDKKKSDLSLSSKL<br>KNKADESEDDGEGED |
| XP_001019354.1 | TtYL1    | T. thermophilus | SWC2  | NEEDEVDDEDEEE<br>MNLADGRAPRKTAG<br>NRMSGLLQAEEDDF<br>YKTTYGGFNESGDE<br>EYNEDRSASEDEVDS<br>DFDIDEGDEPTSDHE<br>EDEPKKKRRVVTKAY<br>KEPIQLLKPKPKKPEA<br>PPNTAAKS RPEKPQE<br>PPDDTVDSRKQMRQ<br>STTEHTRQTLRVKER<br>QIQSKKKKGPHLDRP<br>LTQEELLEAKITEINI<br>RSLNRYERLEADRKK<br>QVHKRRRCAGPTIRY<br>HSMVMPLITELRMKE<br>ENVDVGLDHEQTD<br>RTHAGKCSRSFITFSD<br>DETFFRFPKSRGKF<br>SVRDVCPVTHKPALY<br>RDPITDIPYNSKAFKI<br>IRDAYKKYITTHGLPN<br>AAMATTMGPSADA<br>AQRNTRQIIIKQSVPSA                                                        |
| NP_001085907.1 | XlVps72  | X. laevis       | SWC2  | MDAGDDEPPVLLDR<br>AARASRGKRITKLLLED<br>EVEQDEAFWNQEAL<br>KDEENDDNVVEEPDA<br>GDEFDSDFGEDESET<br>DDEPEKEVRERLPIKK<br>RLMFPGKTLRKTNVK<br>KKKATPKPEDGTKAD<br>KSADKPSSTQADLP<br>DELEAEKAIRKSSRTS<br>VIVRQAEREAIRAEKE<br>ATAKPIKRKKEGEEKR<br>MTQEEMLLEAAETEI<br>MNMNRLERVLAREE<br>EVKKKAVVHKDITYEG<br>PTIRFFSRDGESRLEFI<br>NGASFGESELCCTSSPY<br>PEKPVCVVTGLPAKY<br>RDPKTGLPYATMEAF<br>KIIRSFLEKEADRKR<br>NMSNMGELFESITG<br>GHLMPKKRRVEIRSP<br>NMLGGSRHGGRTW<br>RIPAFDMVDED                                                     |
| ACG47775.1     | ZmVps72  | Z. mays         | SWC2  | MEVDLPRSVKRMV<br>KEKLSYLSKVDDPSK<br>DVNISNEALSASFESA<br>RIFIHYLSATANDICQ<br>ESKRQTINAEDVFKAL<br>EEIDFPFTEPLRVSL<br>DFRKKKAFKSKETN<br>KKRKSEEPESNVIGS<br>EGKGEETEEGGHTK<br>EDMDEQEEDCGDEG<br>KEDEEE                                                                                                                                                                                                                                                                                                                       |
| XP_006855071.1 | AtrPolE3 | A. trichopoda   | PolE3 | MSSNDVDQNDRIA<br>QMMMPAAIVTRLMI<br>KEDNISASKDARDVIA<br>RAAAVFNLNSDVSA<br>QSARDQKHKTISGDD<br>VVKGLRELENTSIHN<br>HCKSANDKWKVISQ<br>QKALARKNPVESSSV<br>NAEMDDDIIDTPVD<br>DSL MN                                                                                                                                                                                                                                                                                                                                             |
| NP_498421.1    | CePolE3  | C. elegans      | PolE3 |                                                                                                                                                                                                                                                                                                                                                                                                                                                                                                                          |

|                |            |                 |       |                                                                                                                                                                                                                                                     |
|----------------|------------|-----------------|-------|-----------------------------------------------------------------------------------------------------------------------------------------------------------------------------------------------------------------------------------------------------|
| XP_645298.1    | DdPolE3    | D. discoideum   | PolE3 | MSESQDLPGAIVNRH<br>KASLPEGVLCAKESRL<br>AIAKAAKVWIHYLTA<br>ASIDFSSHSGRSTISPK<br>DVFAQIEEIDFENFKP<br>QLEEYLAALKSEKEKE<br>KEKEKEKEKEKEKD<br>SNKDDTKSKDENKSS<br>KKSSSSSKDEK                                                                             |
| NP_476646.2    | DmChrac-14 | D. melanogaster | PolE3 | MVERIEDLNLPNAV<br>GRLIKEALPESASVSK<br>EARRAIAAASVFAIF<br>VTSSSTALAHKQNHK<br>TITAKDILQTLTLDPE<br>SFVPSLTQDLEVVRKV<br>VKEKKESKASKDSNT<br>AENANASATAAEEA<br>PE                                                                                         |
| NP_957095.1    | DrPolE3    | D. rerio        | PolE3 | MAERPEDLNLPNAV<br>TRIIKEALPEGVNVSK<br>EARRAISQAASVFVLY<br>ATSCANSFAMKAKRK<br>TLNAGDVMSAMEE<br>MEFERFLQPLREALE<br>AYKKGQKGKKEASEQ<br>KRDKEKKNGTDEND<br>KSRDEEEDEHMDDE<br>QDGENEAEEEDVEN                                                              |
| NP_001265184.1 | HsPolE3    | H. sapiens      | PolE3 | MAERPEDLNLPNAV<br>TRIIKEALPDGVNISKE<br>ARSAISRAASVFLYA<br>TSCANNFAMKGKRR<br>TLNASDVLAMEEME<br>FQRFTPLKEALEAYR<br>REQKGKKEASEQKKK<br>DKDKKTDSEEQDKSR<br>DEDNDEEERLEEEE<br>QNEEEVDN                                                                   |
| NP_067473.2    | MmPolE3    | M. musculus     | PolE3 | MAERPEDLNLPNAV<br>TRIIKEALPDGVNISKE<br>ARSAISRAASVFLYA<br>TSCANNFAMKGKRR<br>TLNASDVLAMEEME<br>FQRFTPLKEALEAYR<br>RDEKGKKEASEQKKK<br>DKDKKTDSEEQDKSR<br>VEEDEERLDEDDQN<br>EEEEIDN                                                                    |
| -              | PpPolE3    | P. polycephalus | PolE3 | MSGDKTEPKKEEKS<br>GEDLELPRAVVQRLIK<br>YSLPDNVHVQAEAKL<br>AIAHAGKVFINYLTAC<br>ANDYCIQGTRSTISAK<br>DVLNACDELEMPFIT<br>KKLKEVLEAYKKEQSE<br>KKEKGKDEKDEGKS<br>ED                                                                                        |
| NP_010406.3    | ScDPB4     | S. cerevisiae   | PolE3 | MPPKGWRKDAQGN<br>YPTTSYIKEQENITIQQ<br>LLFPKSTIVNLAREVP<br>QQSGKKLLINKDASL<br>ALQRGATVFVNHLL<br>FAREIAKSQDKKSCSV<br>DDVLSALDHIGHSAL<br>KGPVRDKLDEYQAAV<br>EQRKKEKLDGGEVDA<br>DGDIDMGEDKENVP<br>VEKVKEHDEIEEQGD<br>ALQDVEESSEKKQKT<br>ESQDVETRVQNLEQT |
| XP_018084282.1 | XICHRAC17  | X. laevis       | PolE3 | MAERPEDLNLPNAV<br>VTRIIKEALPEGVNISK<br>EARSASRAASVFLY<br>ATSCANNFAMKGKR<br>KTLNASDVLAMEE<br>MEFQRFPLTKESLEV<br>YRQDQKGKKEATEQ<br>KKDKKEKKADSEDD<br>KSREENEEDEKME<br>EDEVVVEEEVEN                                                                    |

|                |            |               |       |                                                                                                                                                                                                                                                                                                                                                                                                                                                                                                                                                               |
|----------------|------------|---------------|-------|---------------------------------------------------------------------------------------------------------------------------------------------------------------------------------------------------------------------------------------------------------------------------------------------------------------------------------------------------------------------------------------------------------------------------------------------------------------------------------------------------------------------------------------------------------------|
| OA093127.1     | AthHSP90.1 | A thaliana    | HSP90 | FQAEINQLLSIJINTFY<br>SNKEIFLRELISNSSDA<br>LDKIRFESLTDKSKLD<br>GQPELFIRLVDPKAN<br>KTLSIIDSGIGMTKAD<br>LVNNLGTIARSGTKEF<br>MEALQAGADVSMIG<br>QFGVGFYSAYLVAEK<br>VVVTTKHNDDEQYV<br>WESQAGGSFTVTRD<br>VDGEPLGRGTKISLFL<br>KDDQLEYLEERRLKDL<br>VKKHSEFISYPIYLWTE<br>KTTKEISDDEDEDEP<br>KKENEGEVEEVDEEK<br>EKDGKKKKKIKEVSHE<br>WELINKQKPIWLKRP<br>EETKEEYAAFYKSLTN<br>DWEDHLAVKHFSVE<br>GQLEFKALFVPRAP<br>FDLFDTRKKLNLIKLY<br>VRRVFIMDNCEELIPE<br>YLSFVKGVDSDDLPL<br>NISRETLQQNLIKVI<br>RKNLVKKCIEMFNEIA<br>ENKEDYTKFYEAFSKN<br>LKLGIHEDSQNRGKIA<br>DLLRYHSTKSGDEMT |
| OA094685.1     | AthHSP90.2 | A thaliana    | HSP90 | QLLSIJINTFYSNKEIFL<br>RELISNSSDALDKIRFE<br>SLTDKSKLDGQPELFI<br>HIIPDKTNNLTIIIDSG<br>IGMTKADLVNNLGTI<br>ARSGTKEFMEALAAG<br>ADVSMIGQFGVGFYS<br>AYLVADKVVVTTKHN<br>DDEQYVWESQAGGS<br>FTVTRDTSGETLGRGT<br>KMLVLYKEDQMEYLE<br>ERRKDLVKKHSEFISY<br>PISLWIEKTIEKISDD<br>EEEEEKKDEGKVEEV<br>DEEKEKEKKKKIKE<br>VSHWDLVNNKQPI<br>WMRKPEEINKEEYAA<br>FYKLSNDWEEHLAV<br>KHFSVEGQLEFKALF<br>VPKRAPFDLFDTKKK<br>PNNIKLYVRRVFIMD<br>NCEDIPEYLGFKGIV<br>DSEDPLNISRETLQQ<br>NKILKIRKNLVKKCL<br>ELFFEIAENKEDYNKF<br>YEAFSKNLKLGIHEDS<br>QNRTKIAELLRYHSTK<br>SGDELTSKDYVTRM      |
| XP_006828794.1 | AtrHSP83   | A. trichopoda | HSP90 | FAFQAEINQLLSIJINT<br>FYSNKEIFLRELISNSS<br>DALDKIRFESLTDKSKL<br>DAQPELFIRLVDPKV<br>NKTLSIIDSGIGMTKA<br>DLVNNLGTIARSGTK<br>EFMEALQAGADVSM<br>IGQFGVGFYSAYLVAE<br>KVIVTTKHNDDEQYV<br>WESQAGGSFTVTRD<br>VNGEPLGRGTKITLFL<br>KEDQDYLEERRLKD<br>LVKKHSEFISYPIYLWT<br>EKTTEKESDDEDEEV<br>DKEKKEGDVEEVDD<br>EGKDKKKKKMKEVS<br>HEWTLVNNKQPIWM<br>RKPPEITKEEYASFYKS<br>LTNDWEDHLALKHFS<br>VEGQLEFKALFLPKR<br>APFDLFDTRKKMNNI<br>KLYVRRVFIMDNCEE<br>LIPEYLGFKGVVDS<br>DLPLNISREMLQQNK<br>ILKVIRKNLVKKCIEMF<br>FEIAENKEDYNKFYEA<br>FSKNIKLGIHEDSQNR<br>AKLADLLRYHSTKSGD   |

|                |          |                 |       |                                                                                                                                                                                                                                                                                                                                                                                                                                                                                                                                                                |
|----------------|----------|-----------------|-------|----------------------------------------------------------------------------------------------------------------------------------------------------------------------------------------------------------------------------------------------------------------------------------------------------------------------------------------------------------------------------------------------------------------------------------------------------------------------------------------------------------------------------------------------------------------|
|                |          |                 |       | QLMSLIINTFYSNKEIY<br>LRELISNASDALDKIRY<br>QALTEPSELDTGKELFI<br>KITPNKEEKTLTIMDT<br>GIGMTKADLVNNLG<br>TIAKSGTKAFMEALQ<br>AGADISMIGQFGVGF<br>YSAFLVADKVVVTSK<br>NNDDDSYQWESSAG<br>GSFVVRPFNDPEVTR<br>GTKIVMHKEDQIDFL<br>EERKIKEIVKHSQFIG<br>YPIKLVVEKEREKEVE<br>DEEAVEAKDEEKEG<br>EVENVADDADKKTK<br>KIKEKYFEDELNKT<br>PIWTRNPDDISNEEY<br>AEFYKSLNDWEDHL<br>AVKHFSVEGQLEFRA<br>LLFVPRAPFDLFENK<br>KSKNSIKLYVRRVFIM<br>ENCEELMPEYLNFIG<br>VVDSDELPLNISREML<br>QQSKILKIRKNLVKK<br>CMELIDEVAEDKDNF<br>KKFYEQFGKNLKLGIH<br>EDSTNRKKLSDFLRY<br>TSAGDEPTSLKEYVSR        |
| NP_506626.1    | CeHSP90  | C. elegans      | HSP90 |                                                                                                                                                                                                                                                                                                                                                                                                                                                                                                                                                                |
|                |          |                 |       | NQLMSLIINTFYSNKE<br>VFLRELISNASDALDKI<br>RYQSLTDASVLESKTE<br>LEIKIIPDKTAKTLTID<br>SGIGMTKTDMMVKNL<br>GTIARSGTKNFMEQL<br>QSGAADISMIGQFGV<br>GFYSAYLVADTVIVHS<br>KNNDEQYVWESSA<br>GGEFTIALDHTEPLGR<br>GTKIVLHMKEDQLDY<br>LDETKIKNLVKKHSEFI<br>QYPISLLTIKEKEVDEE<br>TTAKEGEEESTDAKIE<br>EIEEEKEKKVKVQEK<br>EWDVLNKTPLWTR<br>NPSDVTKEEYNSFYKS<br>ISNDWEEPLAVKHFS<br>VEGQLEFKALFVPPK<br>APFDLFESKKANNIK<br>LYVRRVFIMDNCAHII<br>PEYLNFRGIVDSDEL<br>PLNISRETLQQNKILT<br>VIRKNLVKKCIELEFNEI<br>AENSEDYKKFYAFSK<br>NLKLGVEDSQNREK<br>FADLLRYQTSKSGDEL<br>VTLKEYVGRMKEGQ |
| XP_647482.1    | DdHSP90  | D. discoideum   | HSP90 |                                                                                                                                                                                                                                                                                                                                                                                                                                                                                                                                                                |
|                |          |                 |       | QLMSLIINTFYSNKEIF<br>LRELISNASDALDKIRY<br>ESLTDPKSLDSGKELYI<br>KLIPNKTAGTLTIIDTG<br>IGMTKSDLVNNLGTI<br>AKSGTKAFMEALQA<br>GADISMIGQFGVGFY<br>SAYLVADKVTVTSKN<br>NDDEQYVWESSAGG<br>SFTVRADNSEPLGRG<br>TKIVLYIKEDQTDYLEE<br>SKIKEIVNHSQFIGYP<br>IKLLVEKEREKEVSDD<br>EADDEKKEGDEKKE<br>METDEPKIEDVGEDE<br>DADKKDKDAKKKTI<br>KEKYTEDELNKTPI<br>WTRNPDDISQEEYGE<br>FYKSLTNDWEDHLAV<br>KHFSVEGQLEFRALLF<br>IPRRTPPDLFENQKKR<br>NNKLYVRRVFIMDN<br>CEDLIPEYLNFMKGV<br>VVDSDELPLNISREML<br>QQNKVLKIRKNLVK<br>KTMELIEELTEDKENY<br>KKFYDQFSKNLKLGV<br>HEDSNRRAKLADFLR      |
| NP_001261362.1 | DmHSP83B | D. melanogaster | HSP90 |                                                                                                                                                                                                                                                                                                                                                                                                                                                                                                                                                                |



|                |          |            |       |                                                                                                                                                                                                                                                                                                                                                                                                                                                                                                                                                                  |
|----------------|----------|------------|-------|------------------------------------------------------------------------------------------------------------------------------------------------------------------------------------------------------------------------------------------------------------------------------------------------------------------------------------------------------------------------------------------------------------------------------------------------------------------------------------------------------------------------------------------------------------------|
|                |          |            |       | EVETFAFQAEIAQLM<br>SLIINTFYSNKEIFLREL<br>ISNSSDALDKIRYESLT<br>DPSKLDSCDKLIELIP<br>DQKERTLTIIDTGIGM<br>TKADLINNLGTIAKSG<br>TKAFMEALQAGADIS<br>MIGQFGVGFYSAYLV<br>AEKVTVITKHNDDEQ<br>YIWESAAGGSFTVKP<br>DFGESIGRGTKVILHL<br>KEDQSEYVEEKRIKEV<br>VKKHSQFIGYPITLYIE<br>KQREKEVDLEEGERQ<br>EEEEEVAAGEDKDKPKI<br>EDLGADEDEDSKDGK<br>NKRKKVKKEYIDAQ<br>ELNKTPIWTRNPDD<br>ITNEEYGEFYKSLSD<br>WEDHLAVKHFVVEG<br>QLEFRALLFVPRRAAF<br>DLFENKKRRNNIKLYV<br>RRVFIMDNCEELIPEY<br>LNFIKGVVDSDELPLN<br>ISREMLQQSKILKVIR<br>KNLVKKCLDLFTELAE<br>DKDNYKKYEQFSKN<br>IKLGIHEDSQNRKLS |
| NP_571403.1    | DrHSP90A | D. rerio   | HSP90 |                                                                                                                                                                                                                                                                                                                                                                                                                                                                                                                                                                  |
|                |          |            |       | AFQAEIAQLMSLIINT<br>FYSNKEIFLRELVSNAS<br>DALDKIRYESLTDPTK<br>LDSGDKLIDIIIPNVQ<br>ERTLTJDTGIGMTKA<br>DUINNLGTIAKSGTKA<br>FMEALQAGADISMIG<br>QFGVGFYSAYLVAEK<br>VTVITKHNDDEQYA<br>WESSAGGSFTVKVD<br>HGEPIGRGTKVILHLK<br>EDQTEYIEEKRVKEVV<br>KKHHSQFIGYPITLYVEK<br>ERDKEISDDAEKEKA<br>EKEKEEGEDKPKIE<br>DVGSDDEEDTKDKDK<br>KKKKKIKKYIDQEEL<br>NKTPIWTRNPDDIS<br>NEEYGEFYKSLTNDW<br>EDHLAVKHFVVEGQL<br>EFRALLFIPRRAPDFL<br>ENKKKKNNIKLYVRR<br>VFIMDNCEELIPEYLN<br>FIRGVVDSDELPLNIS<br>REMLQQSKILKVIRKN<br>IVKKCLELFAELAEK<br>DNYKKFYDAFSKNLKL<br>GIHEDSQNRKLSSELL    |
| NP_571385.2    | DrHSP90B | D. rerio   | HSP90 |                                                                                                                                                                                                                                                                                                                                                                                                                                                                                                                                                                  |
|                |          |            |       | EEVETFAFQAEIAQL<br>MSLIINTFYSNKEIFLR<br>ELISNSSDALDKIRYES<br>LTDPSKLDGKELHIN<br>LIPNKQDRTLTIIVDTG<br>IGMTKADLINNLGTIA<br>KSGTKAFMEALQAG<br>ADISMIGQFGVGFYS<br>AYLVAEKVTVITKH<br>DDEQYAWESSAGGS<br>FTVRTDTGEPMGRG<br>TKVILHLKEDQTEYLE<br>ERRIKEIVKKHSQFIGY<br>PITLFVEKERDKEVSD<br>DEAEKEKDEKEKEKE<br>EKESEDKPEIEDVGSD<br>EEEEEKDGDKKKKKKI<br>KEKYIDQEELNKTPI<br>WTRNPDDITNEEYGE<br>FYKSLTNDWEDHLAV<br>KHFSVEGQLEFRALLF<br>VPRRAPDFLFENRKK<br>KNNIKLYVRRVFIMD<br>NCEELIPEYLNFIIRGV<br>VDSDELPLNISREML<br>QQSKILKVIRKNLVKK<br>CLELFTELAEDKENYK<br>KFYEQFSKNIKLIGIHE |
| NP_001017963.2 | HsHSP90A | H. sapiens | HSP90 |                                                                                                                                                                                                                                                                                                                                                                                                                                                                                                                                                                  |

|                |          |             |       |                                                                                                                                                                                                                                                                                                                                                                                                                                                                                                                                                                               |
|----------------|----------|-------------|-------|-------------------------------------------------------------------------------------------------------------------------------------------------------------------------------------------------------------------------------------------------------------------------------------------------------------------------------------------------------------------------------------------------------------------------------------------------------------------------------------------------------------------------------------------------------------------------------|
| NP_001258898.1 | HsHSP90B | H. sapiens  | HSP90 | AFQAEIAQLMSLIINT<br>FYSNKEIFLRELISNAS<br>DALDKIRYESLTDPSK<br>LDSGKELKIDIIPNPQE<br>RTLTLVDTGIGMTKA<br>DLINNLGTIAKSGTKA<br>FMEALQAGADISMIG<br>QFGVGFYSAYLVAEK<br>VVVITKHNDDEQYA<br>WESSAGGSFTVRAD<br>HGEPIGRGTKVILHLK<br>EDQTEYLEERRVKEVV<br>KKHSQFIGYPITLYLEK<br>EREKEISDDEAEKEEG<br>EKEEEDKDEEKPKE<br>DVGSDEEDDSGKDKK<br>KKTKKIKEKYIDQEEL<br>NKTKEIPIWTRNPDDIT<br>QEEYGEFYKSLTNDW<br>EDHLAVKHFSVEGQL<br>EFRALLFIPRRAPDFLF<br>ENKKKKNNIKLYVRR<br>VFIMDSCELIPEYLN<br>FIRGVVDSDELPLNIS<br>REMLQQSKILKVRKN<br>IVKKCLELFSLEADKE<br>NYKKFYEAFAFSKNLKL<br>IHEDSTNRRRLSELLR           |
| NP_034610.1    | MmHSP90A | M. musculus | HSP90 | EEVETFAFQAEIAQL<br>MSLIINTFYSNKEIFLR<br>ELISNSSDALDKIRYES<br>LTDPSKLDSGKELHIN<br>LIPSKQDRTLITVDGI<br>GMTKADLINNLGTIA<br>KSGTKAFMEALQAG<br>ADISMIGQFGVGFYS<br>AYLVAEKVTITKH<br>DDEQYAWESSAGGS<br>FTVRTDTGEPMGRG<br>TKVILHLKEDQTEYLE<br>ERRIKEIVKKHSQFIGY<br>PITLFVEKERDKEVSD<br>DEAEKEKEKEKEKEKE<br>EKESDDKPEIEDVGSD<br>EEEEKKDGDKKKKKK<br>KIKEKYIDQEELNKT<br>PIWTRNPDDITNEEY<br>GEFYKSLTNDWEEHL<br>AVKHFSVEGQLEFRA<br>LLFVPRRAPDFLFENR<br>KKKNIKLYVRRVFIM<br>DNCEELIPEYLN<br>FIRGVVDSDELPLNIS<br>REMLQQSKILKVRKN<br>IVKKCLELFSLEADKE<br>NYKKFYEAFAFSKNLKL<br>IHEDSTNRRRLSELLR |
| NP_032328.2    | MmHSP90B | M. musculus | HSP90 | AFQAEIAQLMSLIINT<br>FYSNKEIFLRELISNAS<br>DALDKIRYESLTDPSK<br>LDSGKELKIDIIPNPQE<br>RTLTLVDTGIGMTKA<br>DLINNLGTIAKSGTKA<br>FMEALQAGADISMIG<br>QFGVGFYSAYLVAEK<br>VVVITKHNDDEQYA<br>WESSAGGSFTVRAD<br>HGEPIGRGTKVILHLK<br>EDQTEYLEERRVKEVV<br>KKHSQFIGYPITLYLEK<br>EREKEISDDEAEKEEG<br>EKEEEDKDEEKPKE<br>DVGSDEEDDSGKDKK<br>KKTKKIKEKYIDQEEL<br>NKTKEIPIWTRNPDDIT<br>QEEYGEFYKSLTNDW<br>EDHLAVKHFSVEGQL<br>EFRALLFIPRRAPDFLF<br>ENKKKKNNIKLYVRR<br>VFIMDSCELIPEYLN<br>FIRGVVDSDELPLNIS<br>REMLQQSKILKVRKN<br>IVKKCLELFSLEADKE<br>NYKKFYEAFAFSKNLKL<br>IHEDSTNRRRLSELLR           |

|                |           |                |       |                                                                                                                                                                                                                                                                                                                                                                                                                                                                                                                                                                    |
|----------------|-----------|----------------|-------|--------------------------------------------------------------------------------------------------------------------------------------------------------------------------------------------------------------------------------------------------------------------------------------------------------------------------------------------------------------------------------------------------------------------------------------------------------------------------------------------------------------------------------------------------------------------|
|                |           |                |       | AFQAEINQLLSLIINTF<br>YSNKEIFLRELISNSSD<br>ALDKIRFESLTDKSKLD<br>GQPELFIHIVPDKAN<br>NTLSIISDSIGMTKAD<br>MVNNLGTIARSGTKE<br>FMEALSAGADVSMI<br>GQFGVGFYSAYLVAE<br>KVVVTSKHNDDQYI<br>WESQAGGSFTITRDT<br>SGEPLGRGTHIKLYK<br>EDQLEYLEERRKDLV<br>KKHSEFISYPISLWTEK<br>TTEKEVSDDDEDDK<br>KDEEGKIEEVDEEKEK<br>DKKKKKVKEISREWTL<br>INKQKPIWMRKPED<br>VTKEEYAAFYKSLTND<br>WEEHLAVKHFSVEG<br>QLEFKSVLFVPKRAPF<br>DLFDSRKKQNNIKLYV<br>RRVFIMDNCEELIPEY<br>LGFVKGVVDSDELPL<br>NISRETLQQSKILKVIR<br>KNLVKKCMEMFSEIA<br>ENKEDYQKFYEAFSK<br>NLKLGIHEDSQNRSL<br>ADLLRYHSTKSGDEM       |
| XP_024395876.1 | PpatHSP80 | P. patens      | HSP90 |                                                                                                                                                                                                                                                                                                                                                                                                                                                                                                                                                                    |
|                |           |                |       | LMSLIINTFYSNKEIFL<br>RELISNASDALDKIRYE<br>SLTDKSKLEGAPELFIH<br>IVPDKENKTLTLDGTI<br>GMTKADLINNLGTIA<br>RSGTKNFMHQLSGS<br>ADISMIGQFGVGFYS<br>AYLVADKVTVTSKHN<br>DDEQYIWESSAGGEF<br>FIRRDTEQLGRGTKI<br>ILHLKDDQLEYLEEKRI<br>KDLVKKHSEFIQYPISL<br>WETKETEKEVSDDDE<br>EVKEGEKPTIEEVDED<br>KEADKKKKKKVKEVT<br>HEWVLLNKQKPIWT<br>RNPADITKEEYAAFYK<br>SISNDWEEHLAVKH<br>SVEGQLEFRAILFVPK<br>RAPFDMFESRKKLNN<br>IKLYVRRVFIMDDCKD<br>LIPEWLNFIKIVDSE<br>DLPLNISRETLQQNKI<br>LKVIKKNLVKKCIELFF<br>EIAENAEDFKKFYAF<br>GKNLKLGIHEDSQNR<br>AKLAELLRYNSTKSGD<br>EPTSLKDYITRMPESEQ |
| -              | PpHSP90   | P. polycephala | HSP90 |                                                                                                                                                                                                                                                                                                                                                                                                                                                                                                                                                                    |
|                |           |                |       | MSLIINTVYSNKEIFLR<br>ELISNASDALDKIRYKS<br>LSDPKQLETEPDLFIRI<br>TPKPEQKVLEIRDSGI<br>GMTKAELINNLGTIA<br>KSGTKAFMEALSAGA<br>DVSMIGQFGVGFYSL<br>FLVADRVQVISKSND<br>DEQYIWESNAGGSFT<br>VTLDEVNERIGRGTIL<br>RLFLKDDQLEYLEEKRI<br>KEVIKRHSEFVAYPIQ<br>LVVTKEVEKEVPIPEE<br>EKKDEEKDEEKKDE<br>DDKKPKLEEVDDEEEK<br>KPKTKKVKEEVQEIEE<br>LNKTKPLWTRNPSDI<br>TQEEYNFYKSISND<br>WEDPLYVKHFSVEG<br>QLEFRAILFIPKRAPFD<br>LFESKKKKNNIKLYVR<br>RVFITDEAEDLIPEWL<br>SFVKGVDSEDLPLNL<br>SREMLQQNKIMKVIR<br>KNIVKKLIEAFNEIAED<br>SEQFEKFYSAFSKNIK<br>GVHEDTQNRALAK<br>LLRYNSTKSVDELSTLT |
| NP_015084.1    | SchHSP82  | S. cerevisiae  | HSP90 |                                                                                                                                                                                                                                                                                                                                                                                                                                                                                                                                                                    |

|                |          |              |       |                                                                                                                                                                                                                                                                                                                                                                                                                                                                                                                                                                   |
|----------------|----------|--------------|-------|-------------------------------------------------------------------------------------------------------------------------------------------------------------------------------------------------------------------------------------------------------------------------------------------------------------------------------------------------------------------------------------------------------------------------------------------------------------------------------------------------------------------------------------------------------------------|
|                |          |              |       | INTFYSNKEIFLRELIS<br>NASDALDKIRYISITDS<br>EKAKLEVEPNFRIRIIP<br>DKANNTLTLWDTGIG<br>MTKKELINNLTGIAKS<br>GTKAFMEALSSGADI<br>SMIGQFGVGFYSAYL<br>VAKVEVISKSNDDES<br>QWRWESSAGGTFTV<br>VNDDENPEKLTGRGK<br>IILHMKNDNLEFLEER<br>RIKDLIKKHSEFIAFPIE<br>LQVEKTEEKETDEED<br>EEKEKEDKEKTDEPEI<br>KEETEKDKKKKKVKV<br>VHTEFEEQNKNKPL<br>WMRKPEITKEEYVN<br>FYKSLTNDWEEHQA<br>VKQFSVEGQLEFRAIL<br>FIPKRAPFDLFETKKK<br>KNNIKLYVRRVFIMD<br>DCEELIPEYLNFIKGVV<br>DSEDLPLNISREFLQH<br>NKILKVIKKNIVKKCLD<br>LIQEVADNEEDFKKFY<br>EQFGKNLKLGIHEDS<br>ANREKLSSFLRYHSSK<br>SGEELTLTKDYVSRM |
| AF151114_1     | TtHSP82  | T. thermophi | HSP90 |                                                                                                                                                                                                                                                                                                                                                                                                                                                                                                                                                                   |
|                |          |              |       | QDQQMEEDVETFAF<br>QAEIAQLMSLIINTFY<br>SNKEIFLRELISNSSDA<br>LDKIRYESLTDPKLDOS<br>GKELKIELIPNKQDRS<br>LTIIDTGIGMTKADU<br>NNLTGIAKSGTKAFM<br>EALQAGADISMIGQF<br>GVGFYSAYLVAEKT<br>VITHIDDEQYAWES<br>SAGGSFTVRVDNSEP<br>LGRGTKVILHLKEDQS<br>EYFEEKRIKEIVKKHSQ<br>FIGYPITLFVEKERDKE<br>ISDDEAEKEKEKKDE<br>PKDEEKPEIEDVGSDD<br>EEDKKEGDKKKKKIK<br>EKYIDQEELNKTPIW<br>TRNPDDITNEEYGEFY<br>KSLTNDWEDHLAVK<br>HFSVEGQLEFRALLFV<br>PRRAPFDLFENRKKK<br>NNIKLYVRRVFIMDN<br>CDELIPEYLNFMRGV<br>VDSDELPLNISREML<br>QQSKILKVRKNLVKK<br>CLELFTELSEDKENYK<br>MFYEHFSKNIKLGIHE      |
| XP_018086052.1 | XIHSP90A | X. laevis    | HSP90 |                                                                                                                                                                                                                                                                                                                                                                                                                                                                                                                                                                   |
|                |          |              |       | AFQAEIAQLMSLIINT<br>FYSNKEIFLRELISNAS<br>DALDKIRYESLTDPK<br>LDSGKDLKIDIIPNRQ<br>ERTLTVIDTGIGMTKA<br>DLINNLTGIAKSGTKA<br>FMEALQAGADISMIG<br>QFGVGFYSAYLVAEK<br>VVVITHKNDDEQYV<br>WESSAGGSFTVKIDH<br>GEPGRGTKVILHLKE<br>DQTEYLEEKRVKETVK<br>KHSQFIGYPITLYLEKE<br>REKEISDDEAEKEKE<br>EEKKEEGENEKPKIE<br>DVGSDDEEGKDKKK<br>KTKKIKEKYIDQEELN<br>KTKPIWTRNPDDITQ<br>EEYGEFYKSLTNDWE<br>DHLAVKHFSVEGQLE<br>FRALLFIPRRAPFDLFE<br>NKKKKNNIKLYVRRV<br>FIMSDCELIPEYLNFI<br>RGVVDSDELPLNISRE<br>MLQQSKILKVRKNIV<br>KKCLELFSELAEDKEN<br>YKKFYEAFSKNLKLGI<br>HEDSTNRKRLSSELLRY  |
| XP_041418547.1 | XIHSP90B | X. laevis    | HSP90 |                                                                                                                                                                                                                                                                                                                                                                                                                                                                                                                                                                   |

|                |           |               |       |                                                                                                                                                                                                                                                                                                                                                                                                                                                                                                                                                          |
|----------------|-----------|---------------|-------|----------------------------------------------------------------------------------------------------------------------------------------------------------------------------------------------------------------------------------------------------------------------------------------------------------------------------------------------------------------------------------------------------------------------------------------------------------------------------------------------------------------------------------------------------------|
| NP_001135416.3 | ZmHSP82   | Z. mays       | HSP90 | TETFAFQAEINQLLSLI<br>INTFYSNKEIFLRELIS<br>NASDALDKIRFESLTD<br>KSKLDAQPELFIRLVP<br>DKASKTLSIIDSGVGM<br>TKSDLVNNLGTIARSG<br>TKEFMEALAAAGATDV<br>SMIGQFGVGFYSAYL<br>VADRVMTTKHNDD<br>EQYVWESQAGGSFT<br>VTHDTTGERLGRGTK<br>ITLFLKDDQLEYLEERR<br>LKDLVKKHSEFISYPIY<br>LWTEKTTKEISDDEE<br>EDNKEEEGDVEEVD<br>DEDKADKSKKKKK<br>VKEVSHWVQINKQ<br>KPIWLKPEEITREEY<br>ASFYKSLTNDWEDHL<br>AVKHFSVEGQLEFKAI<br>LFVPRRAPFDLFDTRK<br>KLNNIKLYRRVFIMD<br>NCEELIPEWLGFKG<br>VVDSDDLPLNISRETL<br>QQNKILKIRKNLVKK<br>CIEMFIEAENKDDYA<br>KFYDAFSKNIKLGIHE<br>DSQNRAKLADLLRYH |
| NP_195870.1    | AtHSP70-1 | A thaliana    | HSC70 | TTYSCGVWQHDRV<br>EIIANDQGNRTTPSYV<br>AFTDSERLIGDAAKN<br>QVAMNPVNTVFDKAK<br>RLIGRRFSDSSVQSD<br>MKLWPFKIQAGPAD<br>KPMIYVEYKGEEKEFA<br>AEEISSMVLKMKREIA<br>EAYLGVTIKNAVVTVP<br>AYFNDSQRQATKDA<br>GVIALNVMRIINEPT<br>AAAIAYGDKKATSV<br>GEKNVLIFDLGGGT<br>DVSLLTIEEGIFEVKAT<br>AGDTHLGGEDFDNR<br>MVNHFVQEFKRRSK<br>KDITGNPRALRRLRTS<br>CERAKRTLSSTAQTTI<br>EIDSLYEGIDFYSTITR<br>ARFEELNMDLFRKC<br>MEPVEKCLRDAKMD<br>KSTVHDVVLVGGSTR<br>IPKVQQLQDFFNGK<br>ELCKSINPDEAVAYG<br>AAVQGAILSSEGNEK<br>VQDLLLDVTPLSLGL<br>ETAGGVMTTLIPRNT<br>TIPTKKEQVFSTYSDN         |
| XP_006833219.1 | AtrHSC70  | A. trichopoda | HSC70 | TTYSCGVWQHDRV<br>EIIANDQGNRTTPSYV<br>AFTDTERLIGDAAKN<br>QVAMNPVNTVFDKAK<br>RLIGRRFSDASVQSDI<br>KLWPFKVIPGDKP<br>MIVVQYKGEDKQFA<br>AEEISSMVLKMKREI<br>AEAYLGSVKNNAVVT<br>VPAYFNDSQRQATK<br>DAGVIAGLNVMRIIN<br>EPTAAAIAYGDKKAT<br>SVGEKNVLIFDLGGG<br>TFDVSLLTIEEGIFEVK<br>STAGDTHLGGEDFDN<br>RMVNHVQEFKRRKH<br>KKDISGNPRALRRLRT<br>SCERAKRTLSSTAQTT<br>IEIDSLYEGIDFYSTITR<br>ARFEELNMDLFRKC<br>MEPVEKCLRDAKMD<br>KNTIHDVVLVGGSTRI<br>PRVQQLQDFFNGKE<br>LCKSINPDEAVAYGA<br>AVQAAILSSEGNEKV<br>QDLLLDVTPLSLGL<br>TAGGVMTVLIIPRNTT<br>IPTKKEQVFSTYSDNQ        |

|             |           |                 |       |                                                                                                                                                                                                                                                                                                                                                                                                                                                                                                                                                    |
|-------------|-----------|-----------------|-------|----------------------------------------------------------------------------------------------------------------------------------------------------------------------------------------------------------------------------------------------------------------------------------------------------------------------------------------------------------------------------------------------------------------------------------------------------------------------------------------------------------------------------------------------------|
|             |           |                 |       | SCVGVFMHGKVEIIA<br>NDQGNRTTPSYVAF<br>DTERLIGDAAKNQVA<br>MNPHTVFDARLI<br>GRKFDDPAVQSDMK<br>HWPFKVISAEGAKPK<br>VQVEYKGENKIFTPEE<br>ISSMVLKMKETAEEA<br>FLGTTVKDAVTVPA<br>YFNDSQRQATKDAG<br>AIAGLNVLRIINEPTA<br>AAIAYGLDKKGHGER<br>NVLIFDLGGGTFDVS<br>LTIEDGIFEVKSTAGD<br>THLGGEDFDNRMVN<br>HFCAEFKRKHKKDLA<br>SNPRALRRRTACER<br>AKRTLSSSSQASIEIDS<br>LFEGIDFYTNITRARFE<br>ELCADLFRSTMDPVE<br>KSLRDAKMDKSQVH<br>DIVLVGGSTRIPKVQK<br>LLSDFSGKELNKSINP<br>DEAVAYGAAVQAAIL<br>SGDKSEAVQDLLLLD<br>VAPLSGIETAGGVM<br>TALIKRNTTIPKTAQ<br>TFTTYSDNQPGVLIQ     |
| NP_503068.1 | CeHSP-1   | C. elegans      | HSC70 | VWQNDRVEIIANDQ<br>GNRTTPSYVAFDTE<br>RLIGDAAKNQVAMN<br>PTNTVFDARLIGRKF<br>SDKEVQSDMKHWPF<br>KVIPKDGDKPHIQVEF<br>KGETKVFSPEISSMV<br>LLKMKETAAYLGKTI<br>NNAVITVPAYFNDSQ<br>RQATKDAGTISKLVN<br>QRIINEPTAAIAYGL<br>EKKGSGEKNLIFDLG<br>GGTFDVSLLTIEDGVF<br>EVKATAGDTHLGGED<br>FDNRLVSHFVDEFKR<br>KHKDIMGNQRAVR<br>RLRTACERAKRTLSS<br>AQASIEIDSLFEGIDFY<br>TSITRARFEELCADLFR<br>GCLDPVEKVLKDSKL<br>DKKSIHEIVLVGGSTRI<br>PKVQQLLEFFNGKE<br>LNKSINPDEAVAYGA<br>AVQAAILSNEGGAKV<br>ADLLLLDVAPLSMGL<br>ETAGGVMTTIPRNT<br>TIPCKKTQTFSTYSDN<br>QPGVLIQVYEGERAM  |
| XP_646617.1 | DdHSC70   | D. discoideum   | HSC70 | GVYQHGKVEIIANDQ<br>GNRTTPSYVAFDSE<br>RLIGDPAKNQVAMN<br>PRNTVFDARLIGRKY<br>DDPKIAEDMKHWPF<br>KVVSDGGKPKIGVEY<br>KGESKRFAPEEISSMV<br>LTKMKETAAYLGESI<br>TDAVITVPAYFNDSQ<br>RQATKDAGHIAGLN<br>VLRIINEPTAAALAYG<br>LDKNLNGERNVLIFDL<br>GGGTFDVSILTIDEGS<br>LFEVRSTAGDTHLGG<br>EDFDNRLVTHLAEFF<br>KRKYKDLRSNPRAL<br>RRLRTAAERAKRTLSS<br>STEATIEIDALFEGQD<br>FYTKVSRARFEELCAD<br>LFRNTLQPVKALND<br>AKMDKGQIHIVLVG<br>GSTRIKQVQSLLEFF<br>HGKNLNLINPDEAV<br>AYGAAVQAAILSGDQ<br>SGKIQDVLLVDVAPLS<br>LGIETAGGVMTKLIER<br>NCRIPCKQTKTFSTYS<br>DNQPGVSIQVYEGER |
| AAG26909.1  | DmHSP70Bb | D. melanogaster | HSC70 |                                                                                                                                                                                                                                                                                                                                                                                                                                                                                                                                                    |

|                |         |             |       |                                                                                                                                                                                                                                                                                                                                                                                                                                                                                                                                                       |
|----------------|---------|-------------|-------|-------------------------------------------------------------------------------------------------------------------------------------------------------------------------------------------------------------------------------------------------------------------------------------------------------------------------------------------------------------------------------------------------------------------------------------------------------------------------------------------------------------------------------------------------------|
|                |         |             |       | SCVGVFQHGKVEIA<br>NDQGNRTTPSYVAF<br>DTERLIGDAAKNQVA<br>MNPTNTVFDKRLIG<br>RRFDDGVVQSDMKH<br>WPFNVINDNSRPKV<br>QVEYKGESKSFYPEE<br>SSMVLTKMKEIAEAY<br>LGKTVSNAVITVPAYF<br>NDSQRQATKDAGTIS<br>GLNVLRIINEPTAAAI<br>AYGLDKKVGAEARNVL<br>IFDLGGGTFDVSILTIE<br>DGIFEVKSTAGDTHL<br>GGEDFDNRMVNHFI<br>TEFKRKHKKDISDNKR<br>AVRRLRTACERAKRT<br>LSSSTQASIEIDSLYEGI<br>DFYTSITRARFEELNA<br>DLFRGTLDPVEKALR<br>DAKMDKAQIHDIIVLV<br>GGSTRIPKIQLLQDY<br>FNGKELNKSINPDEA<br>VAYGAAVQAAILSGD<br>KSENVQDLLLLDVTP<br>SLGIETAGGVMTVLK<br>RNTTIPTKQTQFTTY<br>SDNQPGVLIQVYEGE |
| NP_001103873.1 | DrHSPA8 | D. rerio    | HSC70 |                                                                                                                                                                                                                                                                                                                                                                                                                                                                                                                                                       |
|                |         |             |       | SCVGVFQHGKVEIA<br>NDQGNRTTPSYVAF<br>DTERLIGDAAKNQVA<br>MNPTNTVFDKRLIG<br>RRFDDAVVQSDMKH<br>WPFMVVNDAGRPK<br>VQVEYKGETKSFYPEE<br>VSSMVLTKMKEIAEA<br>YLGKTVTNNAVTVPA<br>YFNDSQRQATKDAG<br>TIAGLNVLRINEPTA<br>AAIAYGLDKKVGAE<br>NVLIFDLGGGTFDVS<br>LTIEDGIFEVKSTAGD<br>THLGGEDFDNRMVN<br>HFIAEFKRKHKKDISE<br>NKRAVRRLRTACERA<br>KRTLSSSTQASIEIDSL<br>YEGIDFYTSITRARFEE<br>LNADLFRGTLDPVEK<br>ALRDAKLDSQIHDIIV<br>LVGGSTRIPKIQLLQ<br>DFFNGKELNKSINPD<br>EAVAYGAAVQAAILS<br>GDKSENVQDLLLLDV<br>TPLSLGIETAGGVMT<br>VLIKRNTTIPTKQTQT<br>FTTYSNQPGVLIQV       |
| NP_006588.1    | HsHSC70 | H. sapiens  | HSC70 |                                                                                                                                                                                                                                                                                                                                                                                                                                                                                                                                                       |
|                |         |             |       | SCVGVFQHGKVEIA<br>NDQGNRTTPSYVAF<br>DTERLIGDAAKNQVA<br>MNPTNTVFDKRLIG<br>RRFDDAVVQSDMKH<br>WPFMVVNDAGRPK<br>VQVEYKGETKSFYPEE<br>VSSMVLTKMKEIAEA<br>YLGKTVTNNAVTVPA<br>YFNDSQRQATKDAG<br>TIAGLNVLRINEPTA<br>AAIAYGLDKKVGAE<br>NVLIFDLGGGTFDVS<br>LTIEDGIFEVKSTAGD<br>THLGGEDFDNRMVN<br>HFIAEFKRKHKKDISE<br>NKRAVRRLRTACERA<br>KRTLSSSTQASIEIDSL<br>YEGIDFYTSITRARFEE<br>LNADLFRGTLDPVEK<br>ALRDAKLDSQIHDIIV<br>LVGGSTRIPKIQLLQ<br>DFFNGKELNKSINPD<br>EAVAYGAAVQAAILS<br>GDKSENVQDLLLLDV<br>TPLSLGIETAGGVMT<br>VLIKRNTTIPTKQTQT<br>FTTYSNQPGVLIQV       |
| NP_112442.2    | MmHSC70 | M. musculus | HSC70 |                                                                                                                                                                                                                                                                                                                                                                                                                                                                                                                                                       |

|                |           |                |       |                                                                                                                                                                                                                                                                                                                                                                                                                                                                                                                                                           |
|----------------|-----------|----------------|-------|-----------------------------------------------------------------------------------------------------------------------------------------------------------------------------------------------------------------------------------------------------------------------------------------------------------------------------------------------------------------------------------------------------------------------------------------------------------------------------------------------------------------------------------------------------------|
| XP_024379975.1 | PpatHSC70 | P. patens      | HSC70 | TTYSCGVWQHDRV<br>EIIANDQGNRTTPSYV<br>AFTDTERLIGDAAKN<br>QVAMNPTNTVFDKAK<br>RLIGRRFSDASVQSD<br>MKLWPFKITPGPEGK<br>PMISVQYKGEEKTFA<br>AEEVSSMVLKMKKEIA<br>EAYLGSTVKNAVTV<br>PAYFNDSQRQATKD<br>AGVIAGLNVLRINEP<br>TAAAIAYGLDKKATSV<br>GEKNVLIFDLGGGTF<br>DVSILTIEEGIFEVKAT<br>AGDTHLGGEDFDNR<br>MVNHFVQEFKRKYK<br>KDISSNPALRRLRTA<br>AERAKRTLSSTAQTIT<br>EIDSLYEGVDFYSTITR<br>ARFEELNMDMFRKC<br>MEPVEKSLRDAKMD<br>KSSIHVDVVLGGGSTRI<br>PKVQQLQDFFNGKE<br>LCKSINPDEAVAYGA<br>AVQAAILSGEGNEKV<br>QDLLLLDVTPLSLGL<br>TAGGVMTVLIARNTT<br>IPTKKEQVFSTYSDNQ        |
| -              | PpHSC70   | P. polycephala | HSC70 | SCVGVWQNDRVEIIA<br>NDQGNRTTPSYVAFT<br>DQERLIGDAAKNQV<br>ALNPENTVFDKRLI<br>GRRFSDPVCQDDMK<br>HWPFKVIAKEGDKPH<br>IRVTFKGEQKDFSPEE<br>ISAMVLKMKETAFAF<br>LGATVTNAVITVPAYF<br>NDSQRQATKDAGTIS<br>GLNVLRINEPTAAAI<br>AYGLDKTAEAEKNVLI<br>FDLGGGTFDVSLLTIE<br>SGVFEVKSTGGNTHL<br>GGEDFDNRLVNHFM<br>EEFKRKFKDITGNQR<br>AIRRLRTACERAKRTL<br>SSSTQASIEIDSLHEGV<br>DFYTNITRARFEELCID<br>LFRGCLEPVEKVLRLDA<br>KLSKSQVHEIVLVGGS<br>TRIPKVQQLQDFFN<br>GKELNKSINPDEAVA<br>YGAAVQAAILTGEGG<br>KKVQDLLLLDVPTLTL<br>GIETAGGVMTSUISR<br>NSTIPCKKAQVFSTYS<br>DNQPGVLQVYEGER  |
| NP_009396.2    | ScSSA1    | S. cerevisiae  | HSC70 | VAHFANDRVDIIAND<br>QGNRTTPSFVAFTDT<br>ERLIGDAAKNQAAAM<br>NPSNTVFDKRLIGR<br>NFNDPVEVQADMKHF<br>PFKLIDVDGKPKIQVE<br>FKGETKNFTPEQISS<br>MVLGKMKETAESYLG<br>AKVNDNAVTVPAYF<br>NDSQRQATKDAGTIA<br>GLNVLRINEPTAAAI<br>AYGLDKKGKEEHLIF<br>DLGGGTFDVSLLSIED<br>GIFEVKATAGDTHLG<br>GEDFDNRLVNHFIQE<br>FKRNKKDLSTNQRA<br>LRLRLRTACERAKRTL<br>SSAQTSVEIDSLFEGID<br>FYTSITRARFEELCADL<br>FRSTLDPVEKVLRLDAK<br>LDKSQVDEIVLVGGST<br>RIPKVQKLVTDYFNG<br>KEPNRSINPDEAVAY<br>GAAVQAAILTGDESS<br>KTQDLLLLDVAPLSLG<br>IETAGGVMTKLIPRNS<br>TIPTKKSEIFSTYADN<br>QPGVLQVFEGERAK |



|             |        |               |       |                                                                                                                                                                                                                                                                                                                                                                                                                                                                                                                                                         |
|-------------|--------|---------------|-------|---------------------------------------------------------------------------------------------------------------------------------------------------------------------------------------------------------------------------------------------------------------------------------------------------------------------------------------------------------------------------------------------------------------------------------------------------------------------------------------------------------------------------------------------------------|
|             |        |               |       | VAHFSNDRVDIAND<br>QGNRTTPSVFGTDT<br>ERLIGDAAKNQAAM<br>NPANTVFDKRLIGR<br>NFNDPEVQGDMMHF<br>PFKLDVDGKPKIQVE<br>FKGETKNFTPEQISS<br>MVLGKMKETAESYLG<br>AKVNDVAVTVPAYF<br>NDSQRQATKDAGTIA<br>GLNVLRIINEPTAAAI<br>AYGLDKKGKEEHLIF<br>DLGGGTFDVSLLSIED<br>GIFEVKATAGDTHLG<br>GEDFDNRLVNHFIQE<br>FKRKNKKDLSTNQRA<br>LRLRTACERAKRTL<br>SSAQTSEIDSLFEGID<br>FYTSITRARFEELCADL<br>FRSTLDPVEKVLDAK<br>LDKSQVDEIVLVGGST<br>RIPKVQLVTDYFNG<br>KEPNRSINPDEAVAY<br>GAAVQAAILTGDESS<br>KTQDLLLLDVAPLSLG<br>IETAGGVMTKLIPRNS<br>TIPTKKSEVFSTYADN<br>QPGVLIQVFEGERA        |
| NP_013076.1 | ScSSA2 | S. cerevisiae | HSC70 | VAHFSNDRVEIAND<br>QGNRTTPSVYAFDT<br>ERLIGDAAKNQAAM<br>PHNTVFDKRLIGRK<br>FDDPEVTDDAKHFPF<br>KVISRDGKPVVQVEY<br>KGETKTFTPEEISSMV<br>LSKMKETAENYLGTT<br>VNDVAVTVPAYFNDS<br>QRQATKDAGTIAGM<br>NVLRIINEPTAAAIAY<br>GLDKKGRAEHNVLIF<br>DLGGGTFDVSLLSIDE<br>GVFEVKATAGDTHLG<br>GEDFDNRLVNHILATE<br>FKRKTKKDISNNQRS<br>LRLRTAAERAKRALSS<br>SSQTSIEIDSLFEGMD<br>FYTSITRARFEELCAD<br>LFRSTLEPVEKVLKDS<br>KLDKSQIDEIVLVGGS<br>TRIPKIQKLVSDFFNG<br>KEPNRSINPDEAVAY<br>GAAVQAAILTGQDST<br>KTQDLLLLDVAPLSLG<br>IETAGGIMTKLIPRNS<br>TIPTKKSETFSTYADN<br>QPGVLIQVFEGERT |
| NP_009478.1 | ScSSA3 | S. cerevisiae | HSC70 | VAHFANDRVEIAND<br>QGNRTTPSVYAFDT<br>ERLIGDAAKNQAAM<br>NPHNTVFDKRLIGR<br>KFDDPEVTNDAKHYP<br>FKVIDGGKPVVQVE<br>YKGETKTFTPEEISSMI<br>LTKMKETAENFLGTE<br>VKDAVTVPAYFNDS<br>QRQATKDAGTIAGLN<br>VLRINEPTAAAIAYGL<br>DKKSQKEHNVLIFDL<br>GGGTFDVSLLSIDEV<br>FEVKATAGDTHLGGE<br>DFDSRLVNFLAEFKR<br>KNKKDLTTNQRSLRR<br>LRTAAERAKRTLSSSA<br>QTSIEIDSLFEGIDFY<br>SITRARFEELCADLFRS<br>TLEPVEKVLADSKLDK<br>SQIDEIVLVGGSTRIPK<br>VQKLVSDFFNGKEPN<br>RSINPDEAVAYGAAV<br>QAAILTGQDQSTTQD<br>LLLLDVAPLSLGIETAG<br>GIMTKLIPRNSTIPTK<br>KSEVFSTYADNQPGV<br>LIQVFEGERTRTKDN |
| NP_011029.3 | ScSSA4 | S. cerevisiae | HSC70 |                                                                                                                                                                                                                                                                                                                                                                                                                                                                                                                                                         |

|                |           |              |       |                                                                                                                                                                                                                                                                                                                                                                                                                                                                                                                                                           |
|----------------|-----------|--------------|-------|-----------------------------------------------------------------------------------------------------------------------------------------------------------------------------------------------------------------------------------------------------------------------------------------------------------------------------------------------------------------------------------------------------------------------------------------------------------------------------------------------------------------------------------------------------------|
| XP_001012263.1 | TtHSC70   | T. thermophi | HSC70 | LGTTYSCVGVFINDRV<br>EIIANDQGNRTTPSYV<br>AFTETERLIGDAAKN<br>QVARNPTNTVFDAK<br>RLIGRKFNETVVQKDI<br>KLWPFKVEAGPDDK<br>PKIVVKHKGEVKKFH<br>AEEISSMVLVKMREIA<br>EAFLTKQIKNAVITVP<br>AYFNDSQRQATKDA<br>GAIALNLVRIINEPT<br>AAAIAYGLDKKGQGE<br>KNLVIFDLGGGTFDVS<br>LLTLDDGIFEVKATAG<br>DTHLGGEDFDNKLVE<br>FCAADFLKKKNIDIRE<br>NPRAMRRRLTQCER<br>AKRILSSAQATIEVD<br>ALADSEDFMMVISRP<br>KFEELCLSMFKECIPP<br>VEKVLKDSGMAKNQ<br>VHEVVLVGGSTRIPK<br>VIQLITEFFNGKEPNR<br>SINPDEAVAYGAAIQ<br>AAILTGSSEHIQDVL<br>LLDVTPLSMGIETAG<br>QVMTVLIPRNTTIPTK<br>KSQVFTTYADNQPQGV   |
| NP_001079632.1 | XLHSAP8.L | X. laevis    | HSC70 | SCVGVFQHGKVEIIA<br>NDQGNRTTPSYVAFT<br>DTERLIGDAAKNQVA<br>MNPTNTVFDAKRLIG<br>RRFEDAVVQSDMKH<br>WPFTVVSDDGGRPKV<br>QVEYKAETKSFPPEEV<br>SSMVLTKMKEIAEAY<br>LGKTVTNVAVTVPAY<br>FNDSQRQATKDAGTI<br>SGLNLVRIINEPTAAAI<br>AYGLDKKVGVERNVL<br>IFDLGGGTFDVSILTIE<br>DGIFEVKSTAGDTHL<br>GGEDFDNRMVNHFV<br>AEFKRKHKKDIIDNKR<br>AVRRRLTACERAKRT<br>LSSSTQASIEISLYEGI<br>DFYTSITRARFEELNA<br>DLFRGTLDPVEKSLRD<br>AKLDSQIHDIVLVGG<br>STRIPKIQLLQDFFN<br>GKELNKSINPDEAVA<br>YGAAVQAAILSGDKS<br>ENVQDLLLDVTPLSL<br>GIETAGGVMITVUKR<br>NTTIPTKQTFTTYS<br>DNQPGVLQVYEGER    |
| NP_001148198.1 | ZmHSC70   | Z. mays      | HSC70 | GTTYSVGVWQHDR<br>VEIANDQGNRTTPSY<br>VAFTDSERLVGDAAK<br>NQVAMNPINTVFDA<br>KRLIGRRFSDASVQSD<br>AKLWPFKVIPGSGDK<br>PMIGVQFRGEEKQFS<br>AEEISSMILNKMKETA<br>EAYLGTTIKNAVITVP<br>AYFNDSQRQATKDA<br>GVISGLNVMRIINEPT<br>AAAIAYGLDKKSSSD<br>GEKNVLIFDLGGGTF<br>DVSLTIEEGIFEVKAT<br>AGDTHLGGEDFDNR<br>LVNHFVQEFKRKNKK<br>DITGNPRALRRLRTAC<br>ERAKRTLSSTAQTITIEI<br>DSLYEGIDFYTTITRAR<br>FEELNMDLFRKCMEP<br>VEKCLRDAKMDKSSV<br>HDVVVLVGGSTRIPRV<br>QQLLQDFNKGELCK<br>SINPDEAVAYGAAVQ<br>AAILTGEKNEKVQDL<br>LLLDVSPSLGLETAG<br>GVMITVLIPRNTTIPTK<br>KEQVFSTYSDNQPQGV |

|                |          |               |       |                                                                                                                                                                                                                                                                                                                                                                                                                                                                                                                                                  |
|----------------|----------|---------------|-------|--------------------------------------------------------------------------------------------------------------------------------------------------------------------------------------------------------------------------------------------------------------------------------------------------------------------------------------------------------------------------------------------------------------------------------------------------------------------------------------------------------------------------------------------------|
|                |          |               |       | TMIEPKKLNKRKREPT<br>AIENLTSEEKESQISSL<br>NLEMKGFLDYFREY<br>MDKSKRTDLFSGFSE<br>CSSLNSMVALLMEE<br>MSLPLSKLVDEIYLK<br>EKTESVTMVAVKS<br>VSVGQVRVSYGVLNV<br>DADVLEDDSESCLWC<br>WETRDLMPSVVRG<br>VLKLRTCRKKIHERIT<br>AVSAMLAAQREETE<br>KLWRSDLSKAAEKL<br>KILSEVDIRSFMNDM<br>MQKNSSEMAEKDSK<br>REEKLKLEKNRCE<br>AEKEKKRMRQVLKE<br>KLQKEKEQLLQKAI<br>VDENNKEEETESRK<br>RIKKQQDESEKEQKR<br>REKEQAEKKQLQVQ<br>KQASIMERFLKKS<br>SLTQPKLPSSSEVTA<br>LSCTKHENEIGKVQ<br>AIDNAFSTTCEATVD<br>DIRREHFASWRQLGH<br>LLSSSKHWGMRRQ<br>PKSELFPKLKLSTNSG                |
| NP_176725.1    | AtFAS1   | A thaliana    | CAF1A |                                                                                                                                                                                                                                                                                                                                                                                                                                                                                                                                                  |
|                |          |               |       | RSPKTRMIEHENPRV<br>SPVAVMAIESHGQP<br>MEKSGVSCDMDCRG<br>LVSPIQSQDLPKRKR<br>RRSLEGNMSQEEKEL<br>KIAAFREEIQGLRYY<br>DEFMSKTDLGVDLN<br>GSMDSVIACIEESEL<br>PLKKLVDSVLKSLKR<br>GGEGANITLLSVQNSI<br>HRVGIRNKYGIENPN<br>ADLMEDESKPCLWC<br>WETRELKLLPKAHHG<br>ILKIRRTGRRRIRERIA<br>AVSEMISSLSAQENE<br>NDYKAKIMEASGKLR<br>KILNLERIRDLVSNLLQ<br>KIEAGREVIGEEQKL<br>LDRELKNMGKELKRQ<br>MEEAEREERQREKEL<br>KRQQDEADKEQRRR<br>EREEAELKKQLKRQQ<br>EDAAEQRRHEKEEA<br>ESKKQLKKQEEAEK<br>DKRRREKEEAERKKQ<br>LSVQKQAAMMKRFF<br>KSNSNVNISPTKVSSP<br>RSPHKNEQISNAVILA  |
| XP_006858774.1 | AtrFAS1  | A. trichopoda | CAF1A |                                                                                                                                                                                                                                                                                                                                                                                                                                                                                                                                                  |
|                |          |               |       | LIETNENSCDPNQKG<br>VKRVAQTPPEKDAKK<br>VKLSRDSSNQSVIELS<br>DTSPQKETSQQSPKA<br>PKTPKTPKTPKVSREE<br>REKQKREKMEEREKQ<br>RIERERILEEKRLEKDK<br>LAEEKRLDKEKKEKER<br>LDKKLEEDKKKEEKRK<br>EAEKKKKDEEEKMK<br>KDEERNKRKKEEEKK<br>EAKRREDEEKKEAKR<br>KEEEAIEERKRQSAL<br>FAKFFSKVEKKVAP<br>QKESSNWLPFERKD<br>GMSLAKIISRDPLPDD<br>ADIFTQHEEINSIASFI<br>ESAAKIVPIESSKARN<br>MKAKLFQFHGNRRP<br>QYYGTWRKSKIVSG<br>SCPLAEIEGIDYNVVS<br>DDEWEDEPSDGEEC<br>NSDDDAEKDNDDDD<br>GGEDDGFVPPCYL<br>SDGEGDEDSTSDNDI<br>AGDKKKEQPKRITID<br>SDDDENSTDAERKA<br>RLAQRAEDWAKRTG |
| NP_492440.1    | CeChaf-1 | C. elegans    | CAF1A |                                                                                                                                                                                                                                                                                                                                                                                                                                                                                                                                                  |

|                |           |              |       |                                                                                                                                                                                                                                                                                                                                                                                                                                                                                                                                                       |
|----------------|-----------|--------------|-------|-------------------------------------------------------------------------------------------------------------------------------------------------------------------------------------------------------------------------------------------------------------------------------------------------------------------------------------------------------------------------------------------------------------------------------------------------------------------------------------------------------------------------------------------------------|
|                |           |              |       | IKDTEMKEETPNELPK<br>PIPTSTTTTTTTTTTP<br>TSTTTTTSTPKRRRLT<br>EEEEQKREDEKKKREE<br>DRIKREEDKKKDEEK<br>KKLTEEREIEKKRDEE<br>KKKLLLEEKINRKKREE<br>EAEKKRIEKKKKEEIE<br>KKKEEIERKKGEAERL<br>KEEEQKKKLTSSFFS<br>PIEAPIKPKSNSFIQP<br>IELPSNTQLYQYQLPT<br>YSNSYEVFKESISSN<br>DTIKLETNQKKRDYFS<br>KLNRGTOHGELGQR<br>NHRFKLKIDSLPGAIM<br>HHDLVSRLSALKLLKF<br>HDSFRPSYYGTFSKTS<br>KQJTAKNPFKDLTID<br>YDYDSSDEWEEKDD<br>DQAEKITSADEKEED<br>QDADEEENEEDRAW<br>IDDIGLNDDDDTQVD<br>NSTNISVNERVFSRK<br>NKKRFEKKPIILEPY<br>FNQYPTIINLVHNK<br>NNNNNNNNNNNN<br>NNNNNNNNNNNN |
| XP_637076.1    | DdCAF1A   | D. discoideu | CAF1A |                                                                                                                                                                                                                                                                                                                                                                                                                                                                                                                                                       |
|                |           |              |       | RSQLDGLFRHRDEEA<br>DDEVEEEQNIVRRK<br>PPNRANLYSELSSGR<br>RKPLKMQRDVKLQR<br>RTKDEEDDDVQVID<br>YLSAPAGLIEVEQPKQ<br>LTRMKAKYLFHADNR<br>RPPYYGTWRKSSSIS<br>ARRPLAQDKVLDYE<br>VDSDCWEEEEPGES<br>LSASEKEKESEEESE<br>EEYNEWYVPHGHS<br>DEELQNDGDGMEDG<br>HTREAQKAKLQVLQ<br>QEFAQEMKKQTKKIK<br>ARLLGPVWLDENG<br>KSELFPAIFAHTIDMY<br>ACWQVEPLSEPPPE<br>PERQDQTPQVPVLQ<br>LDDRMLQQLVRLTH<br>GNRNSKTFLINEYLEY<br>LKTQATAEANQTTL<br>SKAVLREFDELASW<br>KTVELSTPEAAAASA<br>NSAKKGRKPKKRLC<br>WVVASDMLKQLP<br>DLQLQNQWNYTLTP<br>KVSDGPDAQQEQS                          |
| NP_572495.1    | Dm-p180   | D. melanog   | CAF1A |                                                                                                                                                                                                                                                                                                                                                                                                                                                                                                                                                       |
|                |           |              |       | TPRRDMDCVGKANT<br>NKKLVQARLPFKRLN<br>PEPKECNEPKRTKGP<br>VAPKCEPSDQENDQ<br>DSSSISHGPA LVNG<br>RGPLDCFMSRRKRSP<br>LRSAPeATIDLTEDSN<br>DSAKQQPAPPIAATC<br>PLSEEKTKTSEGTTPT<br>IPLTEETEKDEAEDV<br>DALPLLDITQSDTEE<br>EEEEEEEEEQQAE<br>VSHGNESVLSTGSTSS<br>ASVIASSPEPSKSAPT<br>TPASTSRINAANKVK<br>RRSLKSVQEEKQQR<br>QRDEKERLKQEAkaa<br>KEKKKEEARKMKEEK<br>EREKKKEKDEKERR<br>EKKERDEKEKADKLK<br>AKEEQRMKIEAKLE<br>EKRRKEEKRLKEEKD<br>RIKAEKAEITRFLQKP<br>KTQLAPKTLASACGK<br>FAPFEIKAHMSLAPLT<br>RVQCEDSVLEDLDY<br>LAQPDSTLNLKDWIT<br>GHKPRSSGPTRRHS         |
| NP_001038478.2 | DrChaf1-A | D. rerio     | CAF1A |                                                                                                                                                                                                                                                                                                                                                                                                                                                                                                                                                       |

|                |         |             |       |                                                                                                                                                                                                                                                                                                                                                                                                                                                                                                                                                                 |
|----------------|---------|-------------|-------|-----------------------------------------------------------------------------------------------------------------------------------------------------------------------------------------------------------------------------------------------------------------------------------------------------------------------------------------------------------------------------------------------------------------------------------------------------------------------------------------------------------------------------------------------------------------|
| NP_005474.2    | Hs-p150 | H. sapiens  | CAF1A | AATAMDCCKDRPAFP<br>VKKLIQARLPFKRLNL<br>VPKGKADDMDDQ<br>GTSVQSKSPDLEASLD<br>TLENNCHVGSDIDFR<br>PKLVNGKGPLDNFLR<br>NRIETSIGQSTVIIDLT<br>EDSNEQPDLSVDHNL<br>LNSEASPSREAINQ<br>REDTGDQQGLLKAIQ<br>NDKLAFPGETLSDIPC<br>KTEEEGVGCGGAGR<br>RGDSQECSPRSCPILT<br>SGPRMCPRKEQDSW<br>SEAGILFKGVPMV<br>VLQDILAVRPPQIKSL<br>PATPQGKNMTPESE<br>VLESFPEEDSVLSHSSL<br>SSPSSTSSPEGPPAPP<br>KQHSSTSPFPTSTPLR<br>RITKKFVKGSTEKNKL<br>RLQRDQERLGKQLKL<br>RAEREKEKLKEEAKR<br>AKEEAKKKKEEEKELK<br>EKERREKREKDEKEKA<br>EKQRLKEERRKERQE<br>ALEAKLEEKRRKKEEK<br>RLREEEKRIKAEAEIT         |
| NP_038761.1    | Mm-p150 | M. musculus | CAF1A | DCKDRPGFPVKRLIQ<br>ARLPFKRLNLVPEKVV<br>EEDTSPKAAVESKVP<br>DLQLSLGTGFESQCHT<br>GSHVGLSTKLVGQGQ<br>PIDSFLRATIKPVPSVV<br>IIDLTENCSDIPDSPEG<br>HSELSPDTAGVTTV<br>EGAAKQEQHSAALC<br>LLETSPDITCHMEEEP<br>GSPGDPKRTGDCQA<br>GSLQSCPELTGSRCT<br>PTKELSSWSKAGDLLF<br>IEKVPVVVLEDILATKP<br>SIASLPMMSLDRSVT<br>SESEILESCPEDDSILS<br>HSSSTNSSPTSSPEGP<br>STPPEHRGGRSSPSTP<br>ACRVAKNFVKGSTEK<br>GRSKLHRDREQREE<br>KEKLREEIRRAKEEAR<br>KKKEEEKELKEKERRE<br>KREKDEKEKAEKQRL<br>KEEKRRKERQALEAKL<br>EEKRKKEEKRLREEE<br>KRLREEEKRIKAEAEI<br>TRFFQKPKTPQAPKT<br>LAGSCGKFAPFEIKEH |
| XP_024369555.1 | PpaFAS1 | P. patens   | CAF1A | PAEREKLRKREKAERKA<br>EKLRIRAEKEAARAER<br>ELKKQQEEAEKEQRR<br>KDRELKKNNEEEKKQ<br>LDDVEKEQRRKEKEAI<br>EAEKELKRKERLRRQ<br>QEEVEKEQKRKEKEV<br>AEKKRQLLLQKQATI<br>MDRLFRRKESITPVA<br>HEKQSPAQGVSSPSP<br>AHQTPEGISTSRTEPS<br>TVEMVMRLDEGLKV<br>PCTLTEEEILRGHVSS<br>WQEKWKRRSLPFR<br>RWGVVRMAPKVTVVR<br>ELRLQGASASFPRRVE<br>SAGNAVSSSTLEAQA<br>PSLKRSREDFESIRDC<br>KVEDDCILLNEDPIDS<br>PPRKKQCNTRWKLL<br>QFDKSHRPAYYGTF<br>KLSSTVGPRHPLRKDP<br>SLDYEVDSDDEEWEE<br>DPGESLSDCEDKEED<br>VEKVDSELEDAADG<br>FVVPDGYLSENEG<br>LEETDVEDTEKAAEVK<br>APCESGTGAECMVS              |

|                |         |               |       |                                                                                                                                                                                                                                                                                                                                                                                                                                                                                                                                                       |
|----------------|---------|---------------|-------|-------------------------------------------------------------------------------------------------------------------------------------------------------------------------------------------------------------------------------------------------------------------------------------------------------------------------------------------------------------------------------------------------------------------------------------------------------------------------------------------------------------------------------------------------------|
| -              | PpCAF1A | P. polyceph   | CAF1A | VFMDAWLTKRVNT<br>PQNDVNNAPAPITD<br>NMDIDTTPKQEDTKI<br>KSPSKTKSPSKPPPPD<br>LQNCVLLSPCPTFFP<br>TQNTPPPHNIPNG<br>NTLQDKPILVDP5VN<br>QSHAPNPAVDAAAT<br>DQPAKPSPKRRLSP<br>EEKQAREDAKAKEE<br>ERKLQAKQREDAKNK<br>KEEEKRLLALAREEEK<br>KKRDEEKRVKDQAKE<br>EARLKKEAEKKARDD<br>AKLQKDLEKKAKEEA<br>RLQKLEKQKQEEEE<br>KRKKERQQAVALANFI<br>KVAPVEAPRPQKVD<br>PDLLIQPFVCGSEVF<br>PPSYLTRQSPGFD<br>DAIAHKDGGITIEKLQ<br>VEFREHMHGKRNRK<br>RDKKRAEKLQGLPP<br>ALSNMKLLRFHDNVR<br>PAYYGTFSKRSVLTG<br>RRPLRTDDAVFDYEV<br>DSDAEWEDEGEHEEL<br>SESEGEKDKEEESEE                |
| NP_015343.1    | ScCac1  | S. cerevisiae | CAF1A | KKGILSFFQNTTTVKS<br>NKFLTKEKDVITLDDP<br>KEDVSGPMIETVKQE<br>TMKSINKECADEMKT<br>TPKKANAEDKLLCYK<br>NSPIQSTKYDRNTNK<br>QVPNGNIIAIEKSR<br>SSPCSKRELSSKKKEEA<br>KREKELKKQRAEEK<br>HRKELLRQEEKKKEL<br>KVEEERQRRRELKKQ<br>KEEEKRRKEEARLEAK<br>RRKEEERLKEEEEIRLK<br>EEAKERAQSRIGNFFK<br>KLSDSNTPVVEKSDYE<br>KFFLPFYAKDGVRRVS<br>NKWKLTKVELEGSKR<br>KIDDELNSKDKTSSD<br>DLLNWLQSRRLPRGH<br>KIKRKAVDVLQQMPL<br>KEKTDELQSLAQV<br>PHKYIKFYENVRPPFI<br>GTYSMDFTLPPNDPF<br>STKGTGFNYDYSDV<br>EWWNEEEGEVDNLE<br>SGEEEEEDDEDVPS<br>EGEFDFGLDSENSDL<br>DGLPCAARKFVGPLIP |
| XP_001021065.2 | TtCAF1A | T. thermophi  | CAF1A | NSROMNIECQGDSP<br>AQTLNQSQNNVQQS<br>AVEVNSQNVQENIE<br>QAKVLNNQNGQS<br>NISEQYWQSKKNGFI<br>QELNKLQIDLSEQI<br>MFAMPQEILSQKIQD<br>YFSAINDSSTEQIAD<br>LQRKLIKESCLWIVEG<br>KNCNDFDLIKLCTVLQ<br>EYTKQCLAQISDISQK<br>DFDFYRDIIGEWAEK<br>KNYGLKLTQDIQTL<br>KQQNEGNLSDQQVS<br>ALKIGLHEIWEVKEIQ<br>CLSNNTKIEELDYIRKK<br>RRQHQALLRGLEKLIK<br>AIEKGKGEDEAFSAY<br>QKTMNPPKMKVQ<br>TKINGKSN5QKQNNQ<br>VDKSIEDNLKKMKIDS<br>GKVTPIDVGEMQNE<br>TNQQENSQLIQQA<br>PKKKTAKKSNKKA<br>GSDQQIEQNEDTQK<br>QSICSSVNNNSITQE<br>QSKQISSKKQNESK<br>KSGNQQQQASANT                   |

|                |              |            |       |                                                                                                                                                                                                                                                                                                                                                                                                                                                                                                                                                      |
|----------------|--------------|------------|-------|------------------------------------------------------------------------------------------------------------------------------------------------------------------------------------------------------------------------------------------------------------------------------------------------------------------------------------------------------------------------------------------------------------------------------------------------------------------------------------------------------------------------------------------------------|
| NP_001082096.1 | XI-p150      | X. laevis  | CAF1A | STKSNTKKMVQARLP<br>FKRLNPVPKDEGCLEE<br>KKVRLTKNVSPQKML<br>HSLNSSMEDMENDC<br>DMETETVPIPKAVNG<br>KGPLDNYIRKAPKVS<br>HAPSITITDLTEESNISI<br>SNDCLPLNGESETHLA<br>NGTLALEESTPNPLS<br>AKEECTVSLNKTVEN<br>THFSELKSDQLHQAA<br>ATSTSASNFSPERVVK<br>EDCNSSADDDASVS<br>SSSSPVLSLSPDAQTG<br>SQFRNRSSPSTTTPT<br>GKVTANKTSADKNKT<br>KDKDKQRQAEKEERE<br>RAKKEARSAKKKRQ<br>GLLKNLQKRKGTSES<br>SGKEYKKEKEREKKE<br>KAEKMKLKEEKREK<br>LEALEAKQEEKRKDE<br>EKRQKEEKRQKEEE<br>KRLKEEERVKAEKAE<br>ITRFFQPKTPQAPKT<br>FSRSCGFAPFEIKKG<br>MALAPLCRIDFEPEAS<br>EELDRFLQEQNSKIYF |
| XP_008656983.1 | ZmFAS1A-like | Z. mays    | CAF1A | EAPDRNDAEPRRDM<br>GQSQMQVGGPVVL<br>NRSaelGSGDFMAID<br>DAPVQAPSGQPAAA<br>KHQSPAALTDTIMEV<br>QKQLKRRASNNPVI<br>AAADKDALAAGCRQ<br>ELEGLFQFYKEVSDRK<br>VQLDGGNLSVNGMV<br>GCLLESSLGLTKLVD<br>GIYEKLGLDGVSVAS<br>VRGSVLLVGQRMMY<br>GKSSLDADVLEDDTE<br>SALWCWETRDCLKM<br>PVKARSVLSTRRSVRK<br>KIHERTAIYSTLSVLE<br>NPGVYVQVNDLKKA<br>SLRLNKSINLEGIRSM<br>VERVAQKNLERGVKV<br>AGSAIKELQETEKND<br>QNLRRLEDTSVSELQ<br>NGNSPDNEKEVQKA<br>QKQVEKEIKRQKEEE<br>ARMKKLQKKQQEDV<br>LREQKRREKEEAEEK<br>KQKQKQEEELKEQK<br>RREKEEAEMKKQHKK<br>QQEEAEKEQKRLKE               |
| Q9SXY1         | AtFAS2       | A thaliana | CAF1B | PVLTVDFHPISGLLAT<br>AGADYDIKLWLINSG<br>QAEKKVPSVSYQSSLT<br>YHGCANTIRFSPSG<br>ELLASGADGGELFIW<br>KLHPSETNQSWKVH<br>KLSLFHRKDVLDLQW<br>SPDDAYLISGSVDNSC<br>IIWVDVNGSVHQILD<br>AHCHYVQGVAWDPL<br>AKYVASLSSDRTCRIY<br>ANKPQTKSGVEKMI<br>NYVCQHVIKADQQ<br>RGDETKTIKTLFHDE<br>TLPFFRRLSWSPDGS<br>FLIPAGSFKVSPTSEA<br>VNATYVFSRKDLSP<br>ALQLPGASKPVVVVR<br>FCPVAFKLRGSSSEEG<br>FFKLPYRLVFAIATLNS<br>VYIYDTECVAPIAVLA<br>GLHYAAITDITWSPN<br>ASYLALSSQDGYCTLV<br>EFEDKELGEAVSISVG<br>KKPVDGEEKKHDLK<br>GDELMTETTPDESKK<br>QAELEQNEESKQPLP<br>SKITTDGKEKEHIMQ  |

|                |          |               |       |                                                                                                                                                                                                                                                                                                                                                                                                                                                                                                                                                        |
|----------------|----------|---------------|-------|--------------------------------------------------------------------------------------------------------------------------------------------------------------------------------------------------------------------------------------------------------------------------------------------------------------------------------------------------------------------------------------------------------------------------------------------------------------------------------------------------------------------------------------------------------|
| XP_020531827.1 | AtrFAS2  | A. trichopoda | CAF1B | QPVLTLDFHSLTNLLA<br>TGGADKDKLWALV<br>QSEAQKKAPTACYQT<br>SLPPHHSTAVNVLRFS<br>PSGEQLASGADGGEL<br>AIWKMQSDDRHTW<br>KVLKTLSFHRKDVLDL<br>QWSTDGAFLLSGSVD<br>NSCIIWDVNGGAVH<br>QILDAHLHYVQGVA<br>WDPSGQYLASLSDDR<br>TCRIYSRKPQKNKAK<br>GQENLNYYVCQHVV<br>KGEFQNLGDTKLSSA<br>RHHLFHDETLPSFFRR<br>LAWSPDGSFLLAPAG<br>IDKLSSASPTCNTAYV<br>FSRNDLARPALQLPG<br>ASKPIVAVRFCPISTL<br>RGSNSAGFFKLPYRIIF<br>AVATLNSLYIYDTSV<br>APVAILAGLHYAAITD<br>IAWSSDAKYLAUSSQ<br>DGYCTILEFENDELGS<br>PLSLTAATEAKIVAKT<br>SEESPVPKTEHMQVD<br>ENRVTIAVEEKARIQI<br>SKVEDNEPKEKNVEIK |
| NP_490902.2    | CeChaf-2 | C. elegans    | CAF1B | GLLSVDLHHETRNKG<br>YRLATASVQKEVRVW<br>EFEFEMGLDPKTQEN<br>KPQLTVGFLANLVFH<br>NHAINQVKFSPSKEH<br>ELLASGDCEGRITWK<br>LSDQPVPVPPQDEMP<br>SNKENWIRYKVLNH<br>NSDVNALCWDPSGT<br>QLASVNDHTLAVHD<br>ALTGKRFLVASNFRSP<br>NGVCWDPGSGKIAT<br>MSPDRKMDLIDAVR<br>GARLKHFSALLPSM<br>TIPANGDLHLETKIH<br>KLFHDDQLFSQRAL<br>GFSPNGEFIAAPCAH<br>LELGSSDLYGTYFFRR<br>EDLGVKEAPYTFYPAP<br>RPTFLVKFSPVTFSLP<br>STKENHLGLPYRLLWI<br>ALNKDAIFYDSQHSY<br>PVAVVDNIHLNALTD<br>ASFSDHGRVLVSSLE<br>GFCFVKINLTQWGE<br>VMTIIVPCGSPNLIE<br>EKKQKKRKSTVAVVIE<br>KEKEKEEDAASPMR          |
| XP_646299.1    | DdCAF1B  | D. discoideur | CAF1B | PIYSADFPTSNNKCT<br>TGFONEIKIWGYTKN<br>KDGHLSVEFLSSLAKH<br>VKPVNIARFSPGGNL<br>LASGSDDGSIWVRL<br>NQNAIPPSDSSMKEI<br>WSIVTVLRVTTDVVD<br>LSWSCDGGQLSTVST<br>DNSVSIWSPLSKTHH<br>QLITEHSYVQGVSW<br>DPLNDFMITQSSDGT<br>CRIYRNEKKKKIITQP<br>SSCPSSTPVSEKDKD<br>SEDTDDNDNSNSND<br>SNNNNTNSNSTGNN<br>VVNSATIEDVNTNSR<br>KKLNLIIISNVLSRRSYN<br>NTSIPNEDIAEIEELQ<br>QQQQQLDEAKIKEES<br>LVSHRMFYDERASTF<br>FRRPSWSPDGSIFITP<br>TGKFRDPSPTSKYQST<br>YIFSRHIRDRPLIPLS<br>NNPTVVVKFNPIIFKL<br>RPDNNTNNNNNNNN<br>DDDSNNDNNNNNN<br>NNNNNNNNNNNNT<br>NNDNDNDNDTSDSDS      |



|                |          |                 |       |                                                                                                                                                                                                                                                                                                                                                                                                                                                                                                                                                                    |
|----------------|----------|-----------------|-------|--------------------------------------------------------------------------------------------------------------------------------------------------------------------------------------------------------------------------------------------------------------------------------------------------------------------------------------------------------------------------------------------------------------------------------------------------------------------------------------------------------------------------------------------------------------------|
| NP_610589.2    | Dm-p105  | D. melanogaster | CAF1B | VLSVDIQQNGLGLRS<br>PTICRLASGGS DAHVL<br>IWYVNRSDDAEGVD<br>VELAADLSRHQRAVN<br>AVRWSPNGELLASG<br>DDES VFIWKQKAD<br>HEVVNIVDADGCSEQ<br>DKEVWLT LKVLRGHR<br>EDIYDLSWAPNSQFL<br>VSGSV DNTAMLW DV<br>HSGKSLALDDHKGY<br>VQGVAWDPCNQYIA<br>TMSTD RQMRIFDAN<br>TKRVLHRVSKCVLPV<br>KEDHEMHGKSMRLY<br>QDGT LQTFFRRLCFT<br>PDGKLLTPSGITDYD<br>GVV KPINTSYGFSRH<br>DLSKPAFVLPFPKEYA<br>VAVRCS PVLRLRPY<br>NAEKNP IISLPYRMI<br>YAVATKN AVFFYDTQ<br>QPVPFAIVSNIHYSRL<br>TDLAWSSDGTVLIVSS<br>TDGYCSLTFEPTELG<br>DCYEDMETVLSVVLK<br>SSENATVLKKRQKLR<br>KVS LDEPRKPLQE KSK           |
| NP_001315058.1 | DrChaf1B | D. rerio        | CAF1B | PVYSLDFQQSGDGKT<br>QRLATAGVDTTVRM<br>WRVDKGP DGKAVVE<br>FLSNLARHTKAVNVV<br>RFSPTAEVLASGGDD<br>AAILLWKLNDNKEPE<br>QTPTFQEEEDAQLNK<br>ESWSVVKTLRGHIED<br>VYDISWTS DGNFMA<br>SGSV DNTAIMWDVN<br>KGQKMCIFNDHKS Y<br>VQGVAWDPLGQYIS<br>TLSCDRVMRVYSAH<br>NRKKAYSISKMTSSAT<br>ADGEVKNYRMFHDD<br>SMRSFFRRLTFTP DGS<br>FLAPAGC VEA GENV<br>TNTTYVFSRKSFKRPI<br>AHLPCPSKATLAVRC<br>SPVYFELRTKRAEDDS<br>LKP VANTFNL PYRLVF<br>AVASEDSIFFYDTQQT<br>LPFGYVSNIIHYHTLSD<br>LSWSRDGSFLAVSST<br>DGYCSFISFDEGELGT<br>PLKEKPPLEMVTPSST<br>NEKKGKRALANGRTA<br>SPVPRQANTPAAQD          |
| NP_005432.1    | Hs-p60   | H. sapiens      | CAF1B | VYSLDFQHG TAGRIH<br>RLASAGVD TNVRIWK<br>VEKGP DGKAI VEF LSN<br>LARHTKAVNVVRFSP<br>TGEILASGGDDAVILL<br>WKVNDNKEPEQIAF<br>QDEDEAQLNKENWT<br>VVKTLRGHLEDVYDIC<br>WATDGNLMASASV<br>DNTAIIW DVSKGQKI<br>SIFNEHKS YVQGV TW<br>DPLGQYVATLSCDRV<br>LRVYSIQKRVA FNVS<br>KMLSGIGAEGEARSY<br>RMFHDDSMKSFRR<br>LSFTPDGSL LTPAGC<br>VESGENVMNTTYVFS<br>RKNLKRPIAHLPCPGK<br>ATLAVRCCPVYFELRP<br>VVETGVELMSLPYRL<br>VF AVASEDSVLLYDT<br>QQSF PFGYVSNIIHYH<br>TLSDISWSSDGAFLAI<br>SSTDGYCSFVTFEKDE<br>LGIPLKEKPV LNM RTP<br>DTAKKTKSQTHRGS S<br>PGPRPVEGTPASRTQ<br>DPSSPGTTPPQARQA |

|                |              |                |       |                                                                                                                                                                                                                                                                                                                                                                                                                                                                                                                                                         |
|----------------|--------------|----------------|-------|---------------------------------------------------------------------------------------------------------------------------------------------------------------------------------------------------------------------------------------------------------------------------------------------------------------------------------------------------------------------------------------------------------------------------------------------------------------------------------------------------------------------------------------------------------|
|                |              |                |       | VYSLDFQHGATWKIH<br>RLASAGVDTAVRIWK<br>LERGPDGKAIVEFSN<br>LARHTKAVNVVRFSP<br>TGEILASGGDDAVILL<br>WKMNDSKEPEQJAF<br>QDEEEAQLNKENWT<br>VVKTLRGHLEDVYDIC<br>WATDGNLMTSASVD<br>NTVIIWVDSKGQKISI<br>FNEHKSIVQGVTDW<br>PLGQYIATLSCDRVLR<br>IYNTQKKRVAFNISK<br>MLSGQGPEGEARSFR<br>MFHDDSMKSFRRILS<br>FTPDGSLLLTPAGCM<br>ESGENVTNTTYVFSR<br>KHLKRPIAHLPCPGK<br>ATLAVRCCPVYFELRP<br>VAETEKASEEPSPELV<br>NLPYRMVFAVASEDS<br>VLLYDTQQSFPGYVS<br>NIHYHTLSDISWSSD<br>GAFLAISSTDGYCTFV<br>TFEKGELGIPLKEKPV<br>SIRTPDTAKKAKNQT<br>HQGSSPGSRSEVETP<br>SNRTQDPSPSCTTPS    |
| NP_082359.1    | Mm-p60       | M. musculus    | CAF1B |                                                                                                                                                                                                                                                                                                                                                                                                                                                                                                                                                         |
|                |              |                |       | PVLSLDFHPSGGLLAT<br>AGADHDIKIWSVHQ<br>KESGSPTVEFEADLCY<br>HSKAVNVLRFSPSGQ<br>LLASGGDGGELIWKP<br>IERADKKPSWKVLKTL<br>QLHVRDVLDLAWSP<br>DSLMLMSGVDNQC<br>MIWDVVSGKVLQVL<br>NDHQHFVQGVAVWD<br>PAGEFTSISSDRTCRI<br>YSRQSVPSKSKRKLAV<br>VQNMFTCKQVLAKS<br>DALPSKTNITIDADGR<br>VAKASQLFHDETLPSF<br>FRRLAWSPDSSFLVV<br>PSGLHRIAHEAPSCN<br>VSFIFSRDLRSPCIHL<br>PAPTKPVAVRFCPI<br>FSLRENETEKSSSGF<br>ALPYRLVFAVATLDSL<br>YVYDTQRSEPIVIFAGI<br>HYAAITDIAWSADAQ<br>YVAVSSQDGYCSLLIF<br>HGNELGTKLSSGDVP<br>ANIAKFLPENLLGKPQ<br>ESLPNSTELSQVSEPV<br>GLMNEEQSSPIVICPR |
| XP_024390997.1 | PpaFAS2-like | P. patens      | CAF1B |                                                                                                                                                                                                                                                                                                                                                                                                                                                                                                                                                         |
|                |              |                |       | PVFSVDFHSSGRLASS<br>GADNDIKIWKIGKRA<br>DGSVSLDFLSLTRHT<br>KAVNVVRFSPDGNFL<br>ATGSDDGYIYIWKLN<br>TSVPVLPDSIDKEVW<br>SVAYTLRGKAQDVYD<br>LAWSPDSSQIIVGSTD<br>NSASVWSVKGQCK<br>HHFEHHNHVYQGVA<br>WDPLGIYLLTFSSDRT<br>LRAYTRKLPKNKKSHK<br>ALPPPTPSSASASTS<br>SSSSDPLLVPDPLSS<br>PSSVPVAPAQNPPAA<br>TPSKKRKVKWIVAQ<br>LVNKNREFGTQGLLE<br>KEKEKEEESGKGKEK<br>EKEKDCLQHKLFLEDES<br>VNTFFRRLTWSPEGS<br>LLFLPTGIHKASPASP<br>PTNVCYAFSRNNLNR<br>PLFYIPSGKPVIAVRCS<br>PILYKLWNGKHPAQ<br>KPLSTSPTPTSSAPS<br>PTSSSTSPTPASSTPV<br>TDAPSAPTSTPPATIP<br>DTPMSDSPNTATPT   |
| -              | PpCAF1B      | P. polycephala | CAF1B |                                                                                                                                                                                                                                                                                                                                                                                                                                                                                                                                                         |

|                |        |               |       |                                                                                                                                                                                                                                                                                                                                                                                                                                                                                                                                                          |
|----------------|--------|---------------|-------|----------------------------------------------------------------------------------------------------------------------------------------------------------------------------------------------------------------------------------------------------------------------------------------------------------------------------------------------------------------------------------------------------------------------------------------------------------------------------------------------------------------------------------------------------------|
| NP_013605.1    | ScCac2 | S. cerevisiae | CAF1B | PVYSLTFQKNSANDK<br>LFTAGGDNKVRIWKL<br>NRDENGQNGGVRKI<br>ESLDFLGSALTHHEQAI<br>NVIRFNSKGDVLASA<br>GDDGGVLLWKQEDP<br>NTQQESVVRPFGMD<br>AETSEADENKEKVVV<br>WKRLRGSGGATAAA<br>EYDLAWSPDNRNIV<br>VACMDNSIRLFDVGA<br>GMLVCGQSDHGHYV<br>QGVAVWDPLNQFILS<br>QSADRSLHVGIVLS<br>AGVVTGLKRSKIACA<br>ELPCPGDVLRTNYLHH<br>NETLPSFFRRCISPC<br>GGLVVIPSGVYKVAG<br>DEVANCVVYTRSGIL<br>NSAGGVKNRPAIRIP<br>SLKKPALMAAFSPVF<br>YETCQKSVLKLPLYLV<br>FAIATTNEVLVYDQDV<br>LEPLCVVGNHYSPT<br>DLAWSEDGSTLIISST<br>DGFCSYVSIDTETQFG<br>SRIEPPAMHAEPLDT<br>DESAAAKNQREAG            |
| XP_001020614.1 | TtFAS2 | T. thermophi  | CAF1B | QRIVTLDVHFPFINLLV<br>TGGSDDEEVYEGEDLEF<br>EEEIGYKLVQINENY<br>TPGQGGDAKPVTFIR<br>ALKKHNSNPVNCVRF<br>PNGQYLASASDDHKKI<br>VIWHVDKGFQNIISTN<br>QKIFNLVKNILEGHN<br>REVCDLRWFNDSTHL<br>ISGGMDYRAYIWNV<br>KEGVIKQTVGAHKSY<br>VQGVAVDPKMKFCL<br>TLGNDRTVKVWRKLK<br>SNNKKNIYEYIPST<br>MKRLPFADVNIEEEM<br>LSDDDEKSSITGNQM<br>NGANGAVNQAMTY<br>GMFLSERQLNTFVKR<br>PDWSPDGSFLLPAA<br>IVQEKRSKIEMCVYL<br>YRRNVLNKPSLIINTN<br>NKPAICTRFQKLFKK<br>KEENQFSMVDIPYV<br>FAISTIDNVMIYSTASL<br>SPLAVVGNHIFALIND<br>LTFFSNQSLIICSSDG<br>MCSFVFEEENDLGKP<br>LNSEEIQDEEIRNVN     |
| NP_001090195.1 | Xl-p60 | X. laevis     | CAF1B | VYSLDFQHGNKFNRR<br>LASAGVDTAVRLWKL<br>ERSPEGKAVVEFLASL<br>ARHTKAVNVVRFSPN<br>GEILASGGDDAAILL<br>WKLNETKECEPAPFQ<br>EQDEFELNKENWTVF<br>KTLRGHLEDVYDICW<br>TQDSNFMVSASVDN<br>TAITWVDVTKGQKLSIF<br>NEHKSYYQGVTVWDP<br>LGQYIATLSCDRIMRV<br>YKTETKRVAYNVSKM<br>TSSPGPDGEAKSFRM<br>YHDDSMKSFFRRLTF<br>TPDGSLLTPAGCVEA<br>GETVINTTYVFGKKNL<br>RRPIAHLPCPTKATLA<br>VRCCPVYFELRPTMK<br>DDSGESRPQGLITQP<br>YRMVFAVASEDAVL<br>YDTQQLFPFGVVSNN<br>HYHTLSDISWSSDGN<br>FLAISSTDGYCSFVTFE<br>EGELGVPLKEKPVALI<br>PKTPATERKIKKAQSK<br>KVSSPGSRQELTPSNK<br>SMEHSAPSTPMNSR |

|                |         |               |       |                                                                                                                                                                                                                                                                                                                                                                                                                                                                                                                                                    |
|----------------|---------|---------------|-------|----------------------------------------------------------------------------------------------------------------------------------------------------------------------------------------------------------------------------------------------------------------------------------------------------------------------------------------------------------------------------------------------------------------------------------------------------------------------------------------------------------------------------------------------------|
| NP_001132835.1 | ZmFAS2  | Z. mays       | CAF1B | QPVLSLDFHPVSRRL<br>ATAGADHDVFKIWEV<br>ASDGKLPATATFKTGLV<br>PNTTAHSSAVNVLRF<br>SPSGEYLASGADGGG<br>ITLWKLHPADDGEA<br>WKIHKTLFFHHKDVL<br>DLQWSHDSTFLVSAS<br>VDNTCIIWEASKGTV<br>QQKLEGLHYVQGV<br>AWDPLGQYIASLSSD<br>RTCKIYAKKPQGSK<br>NAERLNFVCQHTLVK<br>VEYQNHDESKPPTKS<br>HLFHDETLPSFFRRLA<br>WSPDGSFLVLPAGLS<br>KHSSEVINTAYVMSR<br>RDLSPRSIQLPGASKA<br>IVAVRFCPLFKPRGS<br>NSDGFCLKPYRVVFA<br>VATLNSLYVYDTEVP<br>PILVHAGLHYAAITDI<br>AWSSDAKYLAUSSRD<br>GYCTIIIEFENEELGQP<br>HILPGSKEVANGNLT<br>PETKKPVCADSMKVD<br>NSANKLKMEASPA<br>VGVRAPLLPTENIKRT |
| NP_200631.1    | AtMSI1  | A thaliana    | CAF1C | LINEEYKIWKNTPEL<br>YDLVITHALEWPSLTV<br>EWLPDREEPSGKDYS<br>VQKMILGTHTSESEP<br>NYLMILAQVQLPLDDT<br>ESEARQYDDDRSEFG<br>GFGCATGKVQIIQQI<br>NHDGEVNRARYMP<br>QNPFIATKTVNAEVY<br>VFDYSKHPSKPPLDG<br>ACNPDILKRGHSEEG<br>YGLSWSKFKQGHLLS<br>GSDDAQICLWDINAT<br>PKNKSLDAQQIFKAH<br>EGVVEDVAWHLRHE<br>YLFGSVGGDDQYLLIW<br>DLRSPSASKPVQSVV<br>AHSMEVNCLAFNPF<br>NEWVATGSTDKTV<br>KLFDLRKLSTALHTFD<br>SHKEEVFQVGWNP<br>NETILASCCLGRRLM<br>VWDLRIDEEQTVED<br>AEDGPPELLFIHGGH<br>TSKISDFSWNPCEDW<br>VISSVAEDNLIQIWQ<br>MAENIYHDEDDAPG<br>EPPSKAS                 |
| XP_006826731.1 | AtrMSI4 | A. trichopoda | CAF1C | RYTQWKSLLVPVLYD<br>WLANHNLVWPSLSC<br>RWGPQLEQATYKNR<br>QRLYLSEQTDGSPVN<br>TLVIANCEVVKPRVA<br>AAEHISQFNEEARSPP<br>VKKFKTIIHPGEVNRI<br>RELQNSKIVATHTDS<br>PDVLIWDVEAQPNR<br>HAILGASDSRPDLILT<br>GHKDNAEFALAMCP<br>TDPYVLSGGKDKSVV<br>LWSIEDHISAAAAEA<br>PSTKSPGVPSSGSKS<br>NTKTVGPSDKILDSPA<br>IGPRGIYKGHSDTVED<br>VQFCPSAQEFCSVG<br>DSDCLLWDARIGVD<br>PAIKVEKAHNADLHC<br>VDWNPHDENLITGS<br>ADNSVRMFDRRLT<br>SNGIGSPVYKFEGHK<br>AAVLCVQWSPDKAS<br>VFGSSAEDGYLNVW<br>DHEKVSKKENVGNK<br>MPNSPAGLFFQHAG<br>HRDKVVDHWNVSD<br>PWTIVSVSDGESTG              |

|             |          |               |       |                                                                                                                                                                                                                                                                                                                                                                                                                                                                                                                                          |
|-------------|----------|---------------|-------|------------------------------------------------------------------------------------------------------------------------------------------------------------------------------------------------------------------------------------------------------------------------------------------------------------------------------------------------------------------------------------------------------------------------------------------------------------------------------------------------------------------------------------------|
| NP_492552.1 | CeLiN-53 | C. elegans    | CAF1C | MATLEDGTSEDRVA<br>NDEYKIWKKNTPFLY<br>DLVMTHALEWPSLSV<br>QWLPDVAKDNSDHT<br>IHRILGHTSDEQNH<br>LLSKICMPTDDAQFD<br>ASRYDTERSEYGGFG<br>AVNGKVEPDIRINHE<br>GEVNRARYMPQKSN<br>IIATKSPHADVYIFDYL<br>KHSAPRDNFTFNPLI<br>RLKGHTKEGYGLSW<br>NPNKEGLILSASDDQ<br>TVCHWDINANQNVA<br>GELQAKDVFGHESV<br>VEDVAWHVLHDGVF<br>GSVGDDKKLIWDVR<br>TSTPGHCIDAHSAEV<br>NCLAFNPYSEFILATG<br>SADKTVALWDLRNLRL<br>MKLHSFESHREIFQ<br>VQWSPHNETILASSG<br>TDKRLHVWDLKIGE<br>DQSAEDAEDGPPELL<br>FIHGGHTAKISDFSW<br>NPNPWPVVCSVSED<br>NILQVWQMAADNIYN<br>EVDEETPADVVERQQ |
| XP_640105.1 | DdCAF1C  | D. discoideur | CAF1C | EEYKIWKRHPTFLYD<br>MVITHALEWPSLTVA<br>WLPVKTSPNKPYSI<br>EKVILGHTSDEEQNY<br>LMVAKVHLPVDEASI<br>ESLKYDDTKGEVGGI<br>GNVSEKIEIQINHE<br>GEVNRARVMPQNHS<br>IIATKTSSEVYIFDTT<br>KHPLPTPDGKCSPN<br>LKLTHGKKEGYGISW<br>NPRKEGHLSCSDDQ<br>SICMWDISAASKSDS<br>TLDALNIYNGHTSIVE<br>DVAWHYIHDTFGGSV<br>GDDKKLMIWDRTRG<br>TKPIHVVEAHNSEVN<br>CLSFPNPFCEFLVATGS<br>TDKTVLWDMRNLG<br>NRLHSLISHTDEVFQV<br>QFSPHNETVLASCGS<br>DRRVNVWDLRIGEE<br>QNNEDAADGPPELLF<br>IHGGHTSKISDFSWN<br>PNDPWSIASVAEDNI<br>LQIWQMAENIYNDR<br>EDDLENSKVTNAQIG<br>E            |
| NP_524354.1 | Dm-p55   | D. melanogas  | CAF1C | AVEERVINEEYKIWKK<br>NTPFLYDLVMTHALE<br>WPSLTAQWLPDVTK<br>QDQKDYSHRLILGT<br>HTSDEQNHLLIASVQ<br>LPSEDAQFDGSHYDN<br>EKGEFGFGSVCGKI<br>EIEIKINHEGEVNRAR<br>YMPQNACVIATKTPS<br>SDVLVFDYTKHPSKPE<br>PSGECQPDRLRLRGHQ<br>KEGYGLSWNPNLNG<br>YLLSASDDHTICLWDI<br>NATPKHRVIDAKNIF<br>TGHTAVVEDVAWHL<br>LHESLFGSVADDQKL<br>MIWDRNNTSKPS<br>HTVDAHTAEVNCLSF<br>NPYSEFILATGSADKT<br>VALWDLRNLKLLHS<br>FESHKDEIFQVQWSP<br>HNETILASSGDRRLH<br>VWDLKIGEEQSTED<br>AEDGPPELLFIHGGH<br>TAKISDFSWNPNEP<br>WIICSVSEDNIMQV<br>WQMAENVYNDEEP<br>EIPASELETNTA    |

|                |         |             |       |                                                                                                                                                                                                                                                                                                                                                                                                                                                                                                                                  |
|----------------|---------|-------------|-------|----------------------------------------------------------------------------------------------------------------------------------------------------------------------------------------------------------------------------------------------------------------------------------------------------------------------------------------------------------------------------------------------------------------------------------------------------------------------------------------------------------------------------------|
| NP_997760.1    | DrRBBP4 | D. rerio    | CAF1C | RVINEEYKIWKNTPF<br>LYDLVMTHALEWPSL<br>TAQWLPDVTRPEGK<br>DFSVHRLVLGHTSD<br>EQNHLVIASVQLPND<br>DAQFDASHYDSEKGE<br>FGFGSVSGKIEIEIKI<br>NHEGEVNRARYMPQ<br>NPCIIATKTPTSDDL<br>FDYTKHPSKPDPSGE<br>CTPDLRLRGHQKEGY<br>GLSWNPNLRSCLLSA<br>SDDHTICLWDISTVPK<br>EGKIVDAKTIFTGHTA<br>VVEDVSWHLLHESLF<br>GSVADDQKLMWDT<br>RSNNTSKPSHAVDAH<br>TAEVNCLSFNPYSEFIL<br>ATGSADKTVALWDL<br>RNLKLLHSFESHKDE<br>IFQVQWSPHNETILA<br>SSGTDRLNVWDL SK<br>IGEEQSPEDAEDGPP<br>ELLFIHGGHTAKISDF<br>SWNPNEPWVICSVS<br>EDNIMQVWQMAEN<br>IYNDEDPEGAADTEV<br>QG |
| NP_001128727.1 | Hs-p48  | H. sapiens  | CAF1C | RVINEEYKIWKNTPF<br>LYDLVMTHALEWPSL<br>TAQWLPDVTRPEGK<br>DFSIHRLVLGHTSDE<br>QNHHLVIASVQLPNDD<br>AQFDASHYDSEKGEF<br>GGFGSVSGKIEIEIKIN<br>HEGEVNRARYMPQN<br>PCIIATKTPTSDDL<br>YTKHPSKPDPSGECN<br>PDLRLRGHQKEGYGL<br>SWNPNLSGHLASD<br>DHTICLWDISAVPKE<br>GKVVDKTIFTGHTA<br>VVEDVSWHLLHESLF<br>GSVADDQKLMWDT<br>RSNNTSKPSHSVDAH<br>TAEVNCLSFNPYSEFIL<br>ATGSADKTVALWDL<br>RNLKLLHSFESHKDE<br>IFQVQWSPHNETILA<br>SSGTDRLNVWDL SK<br>IGEEQSPEDAEDGPP<br>ELLFIHGGHTAKISDF<br>SWNPNEPWVICSVS<br>EDNIMQVWQMAEN<br>IYNDEDPEGSVDPEG<br>QGS   |
| NP_033056.2    | Mm-p48  | M. musculus | CAF1C | RVINEEYKIWKNTPF<br>LYDLVMTHALEWPSL<br>TAQWLPDVTRPEGK<br>DFSIHRLVLGHTSDE<br>QNHHLVIASVQLPNDD<br>AQFDASHYDSEKGEF<br>GGFGSVSGKIEIEIKIN<br>HEGEVNRARYMPQN<br>PCIIATKTPTSDDL<br>YTKHPSKPDPSGECN<br>PDLRLRGHQKEGYGL<br>SWNPNLSGHLASD<br>DHTICLWDISAVPKE<br>GKVVDKTIFTGHTA<br>VVEDVSWHLLHESLF<br>GSVADDQKLMWDT<br>RSNNTSKPSHSVDAH<br>TAEVNCLSFNPYSEFIL<br>ATGSADKTVALWDL<br>RNLKLLHSFESHKDE<br>IFQVQWSPHNETILA<br>SSGTDRLNVWDL SK<br>IGEEQSPEDAEDGPP<br>ELLFIHGGHTAKISDF<br>SWNPNEPWVICSVS<br>EDNIMQVWQMAEN<br>IYNDEDPEGSVDPEG<br>QGS   |

|                |         |                |       |                                                                                                                                                                                                                                                                                                                                                                                                                                                                                                                                        |
|----------------|---------|----------------|-------|----------------------------------------------------------------------------------------------------------------------------------------------------------------------------------------------------------------------------------------------------------------------------------------------------------------------------------------------------------------------------------------------------------------------------------------------------------------------------------------------------------------------------------------|
|                |         |                |       | LVPALYDWLTNHHL<br>MWPSLSRWGPQLE<br>AGSSKTRQLLFYSERT<br>DGECPNTIVVAQCDI<br>MKPRTAAAEQISQAF<br>IPPCCMSQRPEFKEG<br>GKSPHLKKLTIHPG<br>EVNRIREIPQNSNILA<br>THTDSPKVLWNTKT<br>QPNRATTSAASESKP<br>DLVLIGHTDNAEFAL<br>NVSRTAPYVISGGKTP<br>KSITPTAAGSKQSGTA<br>GGAADTTNVYTRGIF<br>KGHTDVTEDVQFRPS<br>SMNEFCSVGDDSCLL<br>LWDARTGYQPISKVV<br>KAHNADLHCVDWN<br>AHDENULTGSADNS<br>VRLFDHRKILARGQAI<br>PVEQFEGHSAAVLCV<br>QWCPDRASVFGSCA<br>EDGLLNVDYKVG<br>KALDTTNLKQPVKVP<br>PGLFFQHTGHRDKVV<br>DFHWDSDPWTIVS<br>VSEDANTPGGGTTL<br>QIWRMIDFIYRPEDE |
| XP_001776478.1 | Ppa-p48 | P. patens      | CAF1C | NEEYKIWKKNAPFLY<br>DLVMTHALEWPSLTV<br>HWLPDKKIQSNEFS<br>VQRLVLGHTSDAEQ<br>NYLMIKVVHPLDDA<br>NIDPRKYDDQKGEVG<br>GFGAVSEKIEIEQRIN<br>HSGEVNRARAMPQ<br>NPTIATKTVSDVFLF<br>DYTRHSPKSPADGKC<br>NPNAILKGHTKEGYGI<br>DWNPSREGHLLSASD<br>DKTICLWDIHDAKAN<br>TTIEAKQIFRGHKEVV<br>EDVAWHCSHADYFA<br>SAGDDKKLMIWDVR<br>TNADPLQVEAHAGE<br>VNCVAFNPFCEFLA<br>TGSADKTVALWDMR<br>NLDAKLHSFVSHTDE<br>VFQVQWSPHHETVL<br>ASCGSDRRVNVWDL<br>SRIGDEQTAEDAEDG<br>PPELLFIHGGHTSKIS<br>DFSWNYNPWWLAS<br>VAEDNIIQVWQMAE<br>NIYNDDDTDEAQPSN<br>EGDLE            |
| -              | PpCAF1C | P. polycephala | CAF1C | MNQCAKDITHEASSI<br>PIDLQERYSHWKKNT<br>KLLYDYLTNSTKW<br>SLTCQFFPDLDTTSDE<br>HRILLSFTSSQKPEDE<br>TIYISKISTLGHKWSSL<br>NNFDMDEMEFKPEN<br>STRFPKHLVNDISIFF<br>PNGEENRARYLPQN<br>PDIIAGASSDGAIIYFD<br>RTKHGSTRIRQSKISH<br>PFETKLFSGHGVQDV<br>EAMDTSSADINEATS<br>LAWNLQQEALLSSH<br>SNGQVQVWDIKQYS<br>HENPIIDLPLVSINS<br>GTAVNDVTWMPHT<br>DSLFAACTEGNAVSL<br>DLRTKKEKLSNREK<br>HDGGVNSCRFNKYN<br>SLILASADSNRNLN<br>WDIRNMNKSPIATM<br>EHGTSVSTLEWSPNF<br>DTVLATAGQEDGLVK<br>LWDTSCETIFTHGG<br>HMLGVNDISWDAH<br>DPWLMCSVANDNS<br>VHIWKPAGNLVGHS |
| NP_009754.1    | ScCac3  | S. cerevisiae  | CAF1C |                                                                                                                                                                                                                                                                                                                                                                                                                                                                                                                                        |

|                |         |              |       |                                                                                                                                                                                                                                                                                                                                                                                                                                                                                                                                     |
|----------------|---------|--------------|-------|-------------------------------------------------------------------------------------------------------------------------------------------------------------------------------------------------------------------------------------------------------------------------------------------------------------------------------------------------------------------------------------------------------------------------------------------------------------------------------------------------------------------------------------|
| XP_001026968.2 | TtCAF1C | T. thermophi | CAF1C | ENQAINDEYKIWKKN<br>APFLYDIAITHELEWP<br>SLSVQWLPTKDIPQE<br>SDYAIHKLLGTHTS<br>QDKDYLLIAKVRLPLE<br>ETATDISEYQNAKE<br>VGQTGLSAGENRIEIE<br>TKILHDGEINRARYM<br>PKYNIATKVTNGEI<br>HVFDTQHTTTPQN<br>DQVRPQLRLVGHSAE<br>GYGISWNPKKQGYIV<br>SGGYDKKICIWNVEA<br>ASQLNSSISPLHDIEF<br>HKSCVEDVAWHQIN<br>PDIFGSVSDRRTVAI<br>WDMRQKSNAGLINP<br>THCTQAHTGDIYCLD<br>FNPFNEYLFITGSEDK<br>NIGFWDMRNTSKRL<br>HTFVGHTDQVLRCE<br>WSPFNVGVFSSCSAD<br>RRVIVWDISKCGQE<br>MKNEDLVDGPPELLF<br>MHGGHRAKVNDIS<br>WNQKENLILASVEEN<br>NILQVWQMARNIYD<br>DTDDEV MKD |
| NP_001083811.1 | Xl-p48  | X. laevis    | CAF1C | RVINEEYKIWKNTPF<br>LYDLVMTHALEWPSL<br>TAQWLSVTRPDGK<br>DFSIRHLVLGHTSDE<br>QNHLLIASVQLPNDD<br>AQFDASHYSEKGEF<br>GGFGSVSGKIEIEKIT<br>HDGEVNRARYMPQ<br>NPCIATKTPTSDDL<br>FDYTKHPKPDPSGE<br>CNPNLRLRGHKEGY<br>GLSWNPNLSGNLLSA<br>SDDHTICLWDISAVP<br>KEGKVVDAKTIFTGH<br>TAVVEDVSWHLLHES<br>LFGSVADDQKLMIW<br>DTRSNTSKPSHSVD<br>AHTAEVNCLSFNPYS<br>EFILATGSADKTVAL<br>WDLRNLKLLHSFES<br>HKDEIFQVQWSPHN<br>ETILASSGDRRLNV<br>WDLKIGEEQSPEDA<br>EDGPPELLFIHGGHT<br>AKISDFSWNPNEPW<br>VICSVSEDNIMQVW<br>QMAENIYNDEDETEG<br>GVDPEGQGS         |
| NP_001105556.1 | ZmMSI1  | Z. mays      | CAF1C | RAEVEERLINEEYKIW<br>KKNTPFYDLVITHAL<br>EWPSTLVQWLPDRT<br>EPPGKDHVSQKMILG<br>THTSDNEPNYMLA<br>QVQLPLDDAEADAR<br>HYDDDHADIGGFGA<br>ASGKVIVQQINHD<br>GEVNRARYMPQNSFI<br>IATKTVAEVVVDYS<br>KHPSKPLDGACNPD<br>LRLKGHNSEGYGLSW<br>SIFKEGHLLSGDDAQ<br>ICLWDIKANSRNSL<br>DALQIFKHHDGVVED<br>VAWHLRHEYLFGSV<br>GDDYHLLIWDLRSPA<br>PTKPVQSVVAHQGE<br>VNCLAFNPFNEWVV<br>ATGSTDKTVKFLDRK<br>IDTSLHTFDCHKEEVF<br>QVGWSPKNETVLAS<br>CCLGRRLMVWDLRSI<br>DQEQTPEADGPPPE<br>LMFIHGGHTSKISDFS<br>WNPCEWVVASVA<br>EDNILQIWQMAENIY<br>HDEDDLPISEPAKTS   |



|                |         |               |      |                                                                                                                                                                                                                                                                                                                                                                                                                                                                                                                                                                                                                  |
|----------------|---------|---------------|------|------------------------------------------------------------------------------------------------------------------------------------------------------------------------------------------------------------------------------------------------------------------------------------------------------------------------------------------------------------------------------------------------------------------------------------------------------------------------------------------------------------------------------------------------------------------------------------------------------------------|
| NP_001319681.1 | AthIRA  | A thaliana    | HIRA | <p> QIFSIDVQPNGERFAT<br/> GGGDHKVRIWNMK<br/> SVDKDLQNIDTKERLL<br/> ATLRDHFGSVNCVR<br/> WAKNSRYVASGSDD<br/> QVIQIHERKPGSGTTE<br/> FGSGEAPDVENWKA<br/> VMTLRGHTADVVDL<br/> NWSPPDDSLASGSL<br/> DNTVHIWNMRTGM<br/> CTTVLRGHLSLVKGV<br/> WDPIGSFIASQSDDK<br/> TVIIWRTSDWGMMAH<br/> RTDGHWAKSLGSTFF<br/> RRLGWSPCGHFLT<br/> HGFQKPKHSAPVLER<br/> GEWSVAYDFLGHSA<br/> PIIVVRFNHSMFRIIP<br/> SSTHETKQVGWSNG<br/> TSKSGEKDLQSYNVIA<br/> MGSQDRTITVWTTG<br/> SARPLFVAKHFFGQS<br/> VVDLSWSPDGYSLFA<br/> CSLDGTVAMIHFDPK<br/> ELGVRLTDELDELKK<br/> SRYGDVVRGRQANLV<br/> ESPAQLLLETASTKQA<br/> GSKRAASDVQQNQV </p>           |
| XP_006851504.1 | AtrHIRA | A. trichopoda | HIRA | <p> QIFSIDIQPGGLRFAT<br/> AGGDHKVRIWNMKS<br/> VGRETEYDQTNQTL<br/> ATLRDHFGSVNCVR<br/> WAKHGRYVASGSDD<br/> QVILVHERKPGSGTTE<br/> FGSGEPDPVENWKV<br/> VMTLRGHTADVVDL<br/> NWSPPDDLILASCSLD<br/> NTVHIWNMSNGICT<br/> AVLRGHSSSLVKGIW<br/> DPIGSFIASQSDDKTV<br/> IIWRTNDWSQEHRT<br/> GHWGKSVGSTFFRRL<br/> GWSPCGHFITTHGF<br/> QKPRHSAPVLERGD<br/> WSATDFDLGHNAPV<br/> VAVKFNHSMFRKNL<br/> ANGADLKEFQVET<br/> VGWSNGATKSVPRE<br/> SMPYNVIAIGSQDCTI<br/> TVWTTASPRPLFAK<br/> HFFTQSVVDLSWSPD<br/> GYALFACSLDGTVAT<br/> FYFEVKELGHRISDAE<br/> LDELKRSRYGDVRGR<br/> QANLAESPAQLLLEV<br/> ASAKQLPTKRGLSNLS </p>           |
| NP_498101.2    | CeHIRA  | C. elegans    | HIRA | <p> DTGSILAIDCHPSGKK<br/> FITCGQKARTSNGLV<br/> VVWNAEPVLDKKKA<br/> SNENVPKLLFQVESQ<br/> SQSNSCRWSPDGKR<br/> FAFGSDDSSVSVWEY<br/> VGLINMSGITGGAQ<br/> NVERYKECCVLRGHS<br/> MEVLTVIEWSPNGKY<br/> LASGSIIDYRIIYNARK<br/> LPDRITVLDIQLPVK<br/> GLSWDPIGKYLASLE<br/> GDKKLRFWATDSWQ<br/> CVKSVTEPFESNIEET<br/> MLTRLDWSPDGKYL<br/> MTPAAVRSKGPLIKLI<br/> QRQTWKSQDFLAGH<br/> HKGTTTCVRAMPRIE<br/> ANLKNKGRMQLTCA<br/> AVGSRDKSISIVVFP<br/> GTLKPLFVINNFNHT<br/> VMDFAWCGRNLLAC<br/> SQDGTVKVIHLSSEVI<br/> GEMISNEAMSDLCY<br/> QIYSIRPPRYELTDKEE<br/> DESQDSFNLSDLSSSA<br/> NNASFVTCPEDVLIKR<br/> KKLVAAQQSSDIQLT </p> |

|             |        |               |      |                                                                                                                                                                                                                                                                                                                                                                                                                                                                                                                                              |
|-------------|--------|---------------|------|----------------------------------------------------------------------------------------------------------------------------------------------------------------------------------------------------------------------------------------------------------------------------------------------------------------------------------------------------------------------------------------------------------------------------------------------------------------------------------------------------------------------------------------------|
|             |        |               |      | SIYSIDIHPDGRVAT<br>GGGDAKIKIWSMAPI<br>SLLAEEDAGIPKLLCS<br>IENAHFHSVNSVKWS<br>KDGKYLASGDDKLC<br>MIWGLSNNSLLKN<br>TTENWVCVATLRGH<br>ASDISEVSWSPDNKYI<br>ATCSFDKSIWIWETNK<br>FQMVSKLEEKGFKV<br>GLTWDPLGRYLASQS<br>EDKSIIWRTSDWVV<br>ETIVTEPFKHSGNSFF<br>LRPSWTPDGQFIVAT<br>HGINNATHTGVLSR<br>TDWDIGLDLVGHRK<br>AVVVSRCSSKIYKDFK<br>SRDQKFCILLGGQDS<br>TSLWSSSSPSRLMVT<br>RSLFDQCIQDISWCS<br>DGYSFVACSTDGTVG<br>YISLDPEEIGGSPIGPE<br>EKQFFKNYYGDAVTI<br>DKEGNVIYGAAGGNL<br>SSAANSUSHAILPENP<br>DQLAMEESNANGVG<br>SGVSGGVSGGGGS<br>GSGINNQGNGENHS |
| XP_643117.1 | DdHIRA | D. discoideur | HIRA |                                                                                                                                                                                                                                                                                                                                                                                                                                                                                                                                              |
|             |        |               |      | QIFSVDIHKDCTKFAT<br>GGQGSDCGRVVIWN<br>LLPVLSDKAEFDADVP<br>KMLCQMDQHLACV<br>NCVRWSQNGQNL<br>SGSDDKLMIWKRSA<br>GSSGVFGTGGMQKN<br>HESWKCFTLRGHD<br>GDVLDLAWSPNDVY<br>LASCSIDNTVWIWDAQ<br>AFPHSVATLKHTGL<br>VKGVSWDPLGRFLAS<br>QSDDRSIKIWNMTN<br>WSLSHTITEFEECGG<br>TTHILRLSWSPDGQYL<br>VSAHAMNGGGPTA<br>QIEREGWKCDKDFV<br>GHRKAVTCVRFHNSI<br>LSRQENDGSPSKPLQ<br>YCCLAVGSRDRSLV<br>WMTALQRPMVVIHE<br>LFNASILDLTWGPQE<br>CLLMACSDVGSIACL<br>KFTEEELGKAISEEQ<br>NAIRKMYGKNYVNG<br>LGKSAPVLEHPQRL<br>PQGDQPTKFPLSNNN<br>EANQRPISKQTETRTK            |
| NP_572401.2 | DmHIRA | D. melanog    | HIRA |                                                                                                                                                                                                                                                                                                                                                                                                                                                                                                                                              |
|             |        |               |      | PIFSVDIHPDGTKFAT<br>GGQGEDSGKVVIWN<br>MAPVLRREEDEKNENI<br>PKLLCQMDNHLACV<br>NCVRWSNGLYLAS<br>GGDDKLMVMVWKRA<br>AFIGPSTVFGSSSKLA<br>NVEQWRCVTILRNH<br>TGDVMDVAWSPHD<br>VWLASCVDNTIVIW<br>NARKFPEIVMTLKGH<br>TGLVKGLTWDVPVGKY<br>IASQADDHSLKVVWRT<br>MDWQLETNITKPFSE<br>CGGTTTHVRLSWSPD<br>GQYLVSAHAMNNSG<br>PTAQIIERDGVWKTN<br>MDFVGHKAVTVVK<br>FNPKIFKKKQKNGST<br>PKPSCPYPCCAVGSK<br>DRSLSVWLTSLKRPLV<br>VIHDLFDKSIMDITWT<br>LNLGLLLVCSMDGT<br>AFLDFSQDELGDPLN<br>EEKNAIHQNIYKSL<br>AITMESQLSTTIENPE<br>MLKYQQERQGNQN<br>ANVAQSGSPENQTP      |
| XP_696478.2 | DrHIRA | D. rerio      | HIRA |                                                                                                                                                                                                                                                                                                                                                                                                                                                                                                                                              |

|                |         |             |      |                                                                                                                                                                                                                                                                                                                                                                                                                                                                                                                                                                              |
|----------------|---------|-------------|------|------------------------------------------------------------------------------------------------------------------------------------------------------------------------------------------------------------------------------------------------------------------------------------------------------------------------------------------------------------------------------------------------------------------------------------------------------------------------------------------------------------------------------------------------------------------------------|
| NP_003316.3    | HsHIRA  | H. sapiens  | HIRA | <p>PIFSVDIHPDGTKFAT<br/>GGQQQDSGKVIW/<br/>NMSPVLQEDDEKDE<br/>NIPKMLCQMDNHLA<br/>CVNCVWRWSNGMYL<br/>ASGGDDKLIMVWKR<br/>ATYIGPSTVFGSSGKL<br/>ANVEQWRCVSILRN<br/>HSGDVMDDVAWSPH<br/>DAWLASCSDNTVVI<br/>WNAVKFPEILATLRG<br/>HSGLVKGLTWDPVG<br/>KYIASQADDRSLKVV<br/>RTLDWQLETSITKPF<br/>ECGTTHVLRLSWSP<br/>DGHYLVSAHAMNNS<br/>GPTAQIEREGWKTN<br/>MDFVGHRKAVTVVK<br/>FNPKIFKKQKNGSS<br/>AKPSCPYPCCAVGSK<br/>DRSLVWLTCLKRPLV<br/>VIHELFDKSIDISWT<br/>LNLGLILVCSMDGSV<br/>AFLDFSQDELGDPLSE<br/>EEKSRIHQSTYGKSLAI<br/>MTEAQLSTAVIENPE<br/>MLKYQRRQQQQQL<br/>DQKSAATREMGSAT</p>        |
| NP_034565.2    | MmHIRA  | M. musculus | HIRA | <p>PIFSVDIHPDGTKFAT<br/>GGQQQDSGKVIW/<br/>NMSPVLQEDDEKDE<br/>NIPKMLCQMDNHLA<br/>CVNCVWRWSNGMYL<br/>ASGGDDKLIMVWKR<br/>ATYIGPSTVFGSSGKL<br/>ANVEQWRCVSILRSH<br/>SGDVMDDVAWSPHD<br/>AWLASCSDNTVVI<br/>WNAVKFPEILATLRG<br/>HSGLVKGLTWDPVG<br/>KYIASQADDRSLKVV<br/>RTLDWQLETSITKPF<br/>ECGTTHVLRLSWSP<br/>DGHYLVSAHAMNNS<br/>GPTAQIEREGWKTN<br/>MDFVGHRKAVTVVK<br/>FNPKIFKKQKNGSS<br/>KPSCPYPCCAVGSKD<br/>RSLVWLTCLKRPLV<br/>IHHELFDKSIDISWTL<br/>NGLGLILVCSMDGSVA<br/>FLDFSQDELGDPLSEE<br/>EKSRIHQSTYGKSLAI<br/>MTEAQLSTAVIENPE<br/>MLKYQRRQQQQQL<br/>DQKNATTRETSASS</p>        |
| XP_001762381.1 | PpaHIRA | P. patens   | HIRA | <p>QIFSVDTQPNGLRFA<br/>TAGGDHKVRIWNM<br/>KPLAEKETDSDTKLLA<br/>TLRDHFGSVNCVRW<br/>AKCGQKIASGSDDQV<br/>VYIHEKRPGSGTTEFG<br/>SGEPPDVENWKVLLT<br/>LRGHSADVVDLGWS<br/>PDDTQLASCSDNSIR<br/>IWQSTGALLSVLTG<br/>HQSLVKGLTWDPIGS<br/>FLATQSDDKSVIWRW<br/>SNWSMVKKVEGPW<br/>EKTVGSTFFRRLGWS<br/>PCGHFIATTHGFQNP<br/>SHTAPVLERGEWMA<br/>SDFDVGHNAPVVAV/<br/>RFNHSMFRKVKTIAL<br/>SGNGAILGAANGTSS<br/>KTKEPYPYNVIAIGSQ<br/>DCCISVWTTGSPRPV<br/>FIGKHFFQQSVVDLS<br/>WSPDGYTLFCCSLDG<br/>SVASFQFERKELGEKI<br/>SDAEMEETFKSSRYGD<br/>LRVRQATVAESPAQL<br/>MLEAAAAAKWGS<br/>NASNANTIDSTKAVS</p> |

|             |        |                |      |                                                                                                                                                                                                                                                                                                                                                                                                                                                                                                                                                               |
|-------------|--------|----------------|------|---------------------------------------------------------------------------------------------------------------------------------------------------------------------------------------------------------------------------------------------------------------------------------------------------------------------------------------------------------------------------------------------------------------------------------------------------------------------------------------------------------------------------------------------------------------|
| -           | PpHIRA | P. polycephala | HIRA | ACAKFEDQQNTSYNE<br>QMRILKPDWVTHTG<br>YPIFSVDIHDPGSRFA<br>TGGGDNKVIIWASAP<br>VQYEEQEQANNSCPRK<br>LAELTYHMSPISCVR<br>WSHNGQFLASGSDD<br>ALVMLWLKSSGPASK<br>SFGSDELTQENWRCT<br>ATLRGHSKDITDVAW<br>SPDDSQLASCSDNEI<br>LVWDTAKNSVVAKLS<br>GHTGFVKGVAWDP<br>MGRYIASQSEDKTMI<br>VWRCSDWKIETKIEE<br>PFVRSAAATFYRRPS<br>WSPDQGFISSAHAFS<br>GSNHVAMITARDTW<br>RSVCDVFGHKLPIVVT<br>RFNPVIFADTAGNNY<br>GVCLIGQDNTISVW<br>TTISSRPLALNSCFKQ<br>SVLDASWAKDGFSE<br>MCCSTDGTVVWVEF<br>AKGELGTALSPKEMD<br>KVLRSIYGDHILSRPKS<br>TVTVAEADPSQLYLPKT<br>TAPMKPVAAQPPPV               |
| NP_009545.2 | ScHIR1 | S. cerevisiae  | HIRA | SRKYEIVTVDSHDK<br>RLATGGLDGKIRIWSI<br>DSILRCMELESLTPEIP<br>LPQDLQMPLCSMSR<br>HTGSITCVKFSPDGKY<br>LASGSDRILLI WALD<br>EEQSSQPAFGSEHER<br>EHWTVRKRRLVAHDN<br>DIQDICWAPDSSILVT<br>VGLDRSVIVWNGSTF<br>EKLKRFVDVHQS LVKG<br>VVFDPANKYFATTSD<br>DRTMKIFRYHKTGDIS<br>FTIEHIITEFPKESPLTT<br>YFRRPSWSPDGGQHIA<br>VPNATNGPVSSVAIV<br>NRGTWDTNVS LIGH<br>DAPTEVARFNPRLFE<br>RNAGVKQKDDDDPE<br>NALVGQNDKVVHFF<br>DKNIDSVVATAGQDK<br>SLAVWSTSRPRPILVA<br>FDIANKSITDMSWNP<br>DGSLLFVASLDSITLF<br>KFENNELGKPIPLEKN<br>MEQLYRYGVDKDSL<br>FPESINQLLLEDQTKS<br>FKHTKISTSKLGENHP |
| NP_014681.1 | ScHIR2 | S. cerevisiae  | HIRA | NALAALGPYIILAGSG<br>GHVMAWRQQQLVD<br>TAFDRVMIKDLKPEV<br>SFQVDQDTTGDIFFIT<br>GDLETLYIGSEHRLW<br>GYSGLWLCRDTNNINS<br>VEKMNSKLLFECKSPS<br>TITDVKYDINLGILFVL<br>LSNENKILLFRHKTFD<br>KLSEITIDKASKPITGII<br>DPTGQTFTVMTSDRS<br>ILVYQINKTGTHKLIN<br>KLTQHVMYPLHYRI<br>SMSPQADILPVINSV<br>KGVPPNNATCTALLD<br>RNNNYKVTKTLVTPS<br>SNGCRVLVYSPAFYEK<br>PNLKKGTSTRYNLIAT<br>SGSTDGTILVWNTKR<br>MKPLFNALQVSSTAI<br>NDMSWSQDGFTLFA<br>ISNDATLYTFAFQEKD<br>LGVALPQTEIKSLQEV<br>NKKLPKLEELAEQIP<br>KSPENIKLEESASAA<br>PIPNDIGRSAVGKKPT<br>KKKTANNQTNIGIKTI<br>QSTSMFNTPSYTPV  |

|                |        |              |      |                                                                                                                                                                                                                                                                                                                                                                                                                                                                                                                                                |
|----------------|--------|--------------|------|------------------------------------------------------------------------------------------------------------------------------------------------------------------------------------------------------------------------------------------------------------------------------------------------------------------------------------------------------------------------------------------------------------------------------------------------------------------------------------------------------------------------------------------------|
| XP_001014644.1 | TtHIRA | T. thermophi | HIRA | EEIISINFQNGNVL<br>VFCSGQDNDQKIVK<br>TTINQDYMNQNVTN<br>KVDFQPLNIRSVQSS<br>NLIKWSPNDQFLAAA<br>FEKLGWGYANGDIY<br>KLKDFKDELEIAAIT<br>WAPDSSRIASGGLDG<br>KIVVRSVDIAKNYEKI<br>KELSHDNKILGLVWD<br>TYDKYLAALYSDNNVI<br>IWKCNSEKSFIVSLT<br>CPISSDISKITSKRDDR<br>KIDWSPDYRYVLVPSL<br>DDKIVPFVICALDRQK<br>DFKVCKTFMGPFSSI<br>NCVKFNPNLYENKES<br>VINVFALGDNDGNISI<br>WGIGDGYQAKKPFFL<br>FKSHPNGNELIEDIC<br>WNAEGNMLIATTLK<br>KYVFLALFGETVFGSK<br>LSPQQQDFLEGKYG<br>TLRTVAATNMFKVVF<br>KATQEEEEEQKNKE<br>KQLFEAKGDNKQIDSI<br>LGRGNNGKTATQF<br>GSSNSTNQADQNQ |
| Q8QFR2         | XIHIRA | X. laevis    | HIRA | PIFSVDIHPDGTKFAT<br>GGQGQDSGKVVIV<br>NMPPMLKEEDEKNE<br>NIPKMLCQMDNHIA<br>CVNVCVRWSNNGAYL<br>ASGGDDKLIMVWKR<br>SGYIGPSTVFGSSSKL<br>ANVEQWRCLSLRSH<br>SGDVMMDVAWSPHD<br>AWLASCSDNTVVI<br>WNALKFPEISTLRGH<br>SGLVKGLTWDVPVGKY<br>IASQADDSIKVWRT<br>MDWQLETSITKPFDE<br>CGGTTHLRLSWSPD<br>GHYLSAHAMNNSG<br>PTAQJIERDGWKTN<br>MDFVGHKAVTVVK<br>FNPKIFKKQKNGSST<br>KTSCPYCCAVGSKD<br>RSLSWLTLCKRPLV<br>IHELFDKSIMDISWTL<br>NGLGILVCSMDGSVA<br>YLDIFSQDELGDPLSEE<br>EKNNIHQSTYKSLAI<br>TTEPQLPNTVIENPE<br>MLKFQQRQQLQQD<br>GEHMQAQMEAPI                |
| A0A3L6FHG3     | ZmHIRA | Z. mays      | HIRA | FSIDIQTGGLRFATGG<br>GDQKIWASVLPAGR<br>PVPKKERVSGGMKH<br>GGEKQVCGAQLGFR<br>PCFMAHLAPPPQLLA<br>PSSPQPLPALASAAAS<br>NAASVRLAKAARLVR<br>LAKAARLRLAKAAR<br>PLQLCHRRPRLTAGS<br>PPTRTMGASCFTITT<br>PLPPACTSAVSPPLPL<br>LFYRQTPATKIILSLEH<br>PATTRPPVPSLLQAPK<br>RLQKKALDSQSEGML<br>ACCVISLLRKMVRIV<br>SMESVHKDNANND<br>NQRLLATLRDHFGSV<br>NCVRWAKHGRYLAS<br>GSDDQVILHERKAGS<br>GTSEFGSGEPPDAEN<br>WKVIMTLRGHTADV<br>VDLSWSPDDSTLASG<br>SLDNTIHIWNMNGI<br>CTAVLRGHTSLVKGV<br>TWDPIGSFIASQSDD<br>KTVMIWRTSDWSLA<br>HKTEGHWTSLGSTF<br>FRRLAWSPCGHFITT    |

|                |        |               |     |                                                                                                                                                                                                                                                                                                                                                                                                                                                                                                                                                     |
|----------------|--------|---------------|-----|-----------------------------------------------------------------------------------------------------------------------------------------------------------------------------------------------------------------------------------------------------------------------------------------------------------------------------------------------------------------------------------------------------------------------------------------------------------------------------------------------------------------------------------------------------|
|                |        |               |     | ELLRASPKVLTAGDRK<br>LLKVELRPGDTTYVS<br>WKKLMRDAGKVNL<br>SASVPDPPPNANPNL<br>EFRIAPGHPVEIETNE<br>QPHSNRFNAVIEKIER<br>LYKGNDS SDGEELDG<br>APDDDEYDTEDSFID<br>DAELDEYFEVDNSTV<br>KHDGFYVNRGKLER<br>MEPSTTSNQQPKKR<br>RRKDSAKPCRDADV<br>SDKHTKLSITARKKDQ<br>STAPGSWKTQESPLP<br>SGAQDANTSVP added<br>VKHSDRANHQS added<br>TSHKSRETGSSSALHQ<br>KYSNKSLLHQSTSLG<br>KSPPNVFAEVTVVRQ<br>KENNGMHQLANVT<br>GSRQSSQASKDGSN<br>VKKTSILEKAIKIRELEK<br>VVVESRPPAITENQE<br>ADTSSQAVKRRLPRD<br>VKLKLAKVARIAS<br>QGKSTELINRLMSIV<br>GHLIQLRSLKRNLMIM<br>IDMGDSATREKDFR |
| NP_173580.2    | AtUBN1 | A thaliana    | UBN |                                                                                                                                                                                                                                                                                                                                                                                                                                                                                                                                                     |
|                |        |               |     | NESCKISSEILTAGDRK<br>LLKVELLKEETTLVSW<br>KKLMDEASKENGGLF<br>VSAPERLLNANPNLE<br>FRLAPGAQTENEMV<br>NQPHPNRLNSVIAKI<br>ERLYMGKDGSDGEEL<br>DGAPDDDDYDTEDSF<br>IDDAELDEYFEVDNSP<br>IKHDGFFVNRGKLERI<br>EPSATSNQQPKKRR<br>RKESAKPCGDVVDVS<br>RKRAKMAKTAGGKD<br>QSASPGPSSKKISNDS<br>KTVQDSFSPKQNG<br>NDSLVLNVKHTDKA<br>NHQPMNATSPKSKA<br>AGSSGPLHPKCSSKS<br>VHEQSNPPGKSRPN<br>VSAKSAVVRQVNN<br>GMPDLDIATESKTSIQ<br>ISKKSNGRPRKYSTL<br>EKAIRNLEKLVAESRP<br>PAATENQDADISSQA<br>VKRGLPGDVKLHLAK<br>VARIAYASQGEISGELI<br>NRLMGIVGHLIQIRSL<br>KRNLMIMDSIVTANR   |
| NP_177855.4    | AtUBN2 | A thaliana    | UBN |                                                                                                                                                                                                                                                                                                                                                                                                                                                                                                                                                     |
|                |        |               |     | SVSPSGAVASSLYDP<br>KGAISQRQSFVSLR<br>PGETTIVSWKRLVKD<br>SNKAIRNSASVEPPV<br>GAHPALESRIAPEGH<br>ARHELEDVPPSNRF<br>SAVIQIERLYKGRESS<br>DEEDLDIPDDQYD<br>TDDSFIDDAELDEVFQ<br>VDKSETKHNGFFVNR<br>GKLEKTNDPISSPVHA<br>PKKRRRDLNNAISE<br>NAAENLPKRHLNVG<br>GVRMKAARNAPLV<br>GNKLSVPSQAKTSV<br>GGELGHDIKSSQNQL<br>IACVETSKQPLDSS<br>MKQENSISTKLPNKDI<br>SMEDKDGSQKPGLL<br>PSGEGASKLTVNKEH<br>AHPIDRDLKGNPV<br>QVESQHKKALKDAK<br>GLLPSSKIRPKEGVGS<br>SDMRDTHILASKSPL<br>QKMKLPSLASKEGAA<br>VRPKGTMLEKIRELE<br>NKVAELRPPAMDLO<br>EVDASAQGIKRRLPQ              |
| XP_006847173.1 | AtrUBN | A. trichopoda | UBN |                                                                                                                                                                                                                                                                                                                                                                                                                                                                                                                                                     |

|                |          |               |     |                                                                                                                                                                                                                                                                                                                                                                                                                                                                                                                                                           |
|----------------|----------|---------------|-----|-----------------------------------------------------------------------------------------------------------------------------------------------------------------------------------------------------------------------------------------------------------------------------------------------------------------------------------------------------------------------------------------------------------------------------------------------------------------------------------------------------------------------------------------------------------|
| NP_001255177.1 | CePQN-80 | C. elegans    | UBN | SAKNEVIQIRISVAKP<br>GSKKYTHVDWEELLK<br>NNGKERDEDDLRRFY<br>DEDTLFMAKKLGETR<br>SKSGKKLRVNLQDQ<br>HFNRKCGYDMDDDF<br>IDDEIVDDEPTTSKK<br>GGFYVGKGDVKDSN<br>DEDEEEEEETDVEESI<br>QEVPKVKIRKIKEKS<br>GEKSSKSSDSSSSSS<br>DSEDAAGPPRMTGA<br>PPSIRMVSSSSSLKKL<br>PAPRKPSPPPAVEPT<br>RSVIEIEKPEKTEKPAE<br>KRKTAATTSALEPAEK<br>KKKPDSSSSSEIILDD<br>NAPAACKQPESAQK<br>GSTTIVTMSAKKICKQ<br>QEIEIAKQKPSSSSVTP<br>SKPAAPTASTPKKEEI<br>GTLETFLKNIFANLDA<br>KGKLYQEKKLKTFDTE<br>TLKEITTFIDVMKHHK<br>TEKVNMPLIYSLAKS<br>FGMTTQEVVMKQVE<br>QEISSKATTPKPSTN<br>AVLSTISSQKSLEKNA |
| XP_645639.1    | DdUBN    | D. discoideur | UBN | NKISNGNSFFSPNLFT<br>FSSSKTLTSRILNFKN<br>NNNNNNNNNNNNN<br>NNNNNNNNNNNNN<br>NNNNNNNNNNNNN<br>NNNNNNDYNDSSNE<br>EENEYSIIKRKKKIKIAP<br>TISKLLSIKKSEFNDD<br>NSDEESYEDDFVDYE<br>NENENENENENEYK<br>NENENEDNKNEDNQ<br>DNDLAPSSSKLFRFLC<br>TPKIQTNIKINNNKNK<br>NKNKGNDSTKKVD<br>SEINEKEEDSNAELKS<br>KPKAIRIEVDLKSNGIII<br>NFQQLVSNESNPLIS<br>NNNNNNNKSLISQT<br>NNFVKSFKNENISNIT<br>FNERKNVLGMVLIKI<br>GAGAKNNSSTRVEQ<br>KVEKEEERGEEEDFHY<br>YLDSGDSTISEYDIE<br>DPFVDDSLLIKDHAAH<br>SDSNGIDDDSDINN<br>LETNGFYVIQNGIDLK<br>FNNNNNNNNNNKNN<br>NNNSGGANNNNNN           |
| NP_476893.1    | DmYem    | D. melanogas  | UBN | QGDAGFSRFGSNILE<br>PDAASAAPDNSSKPT<br>TKTAKCIRIKDLFETD<br>SNKYPEFNYSRLLYLE<br>KKKTKKLKQVSTTNG<br>SASTDPFADNDDV<br>ARIVKELEAKYGNSYA<br>TGRGSKKDDYRDIG<br>MGYDESDFSIDNTEA<br>YDEIIPAEATLEGGFY<br>INCGALEFKNLTKKS<br>TTRTDIIKMPERSRK<br>RMVSSSSSSSSSSGD<br>DDENDDGNNNEEDDE<br>SDEDDSEENDES<br>EDDSESELEDEDSAA<br>TAKSSSKYKDNHQAK<br>RAKVIVTGKSKPSSSS<br>LTSGKKPPTKPITSSS<br>SNSPRPSTVEISDTED<br>GQDPITQTPSSQLQS<br>LPQSQAQAQALKKV<br>VKTTTVKMDLAKARD<br>SFLKSQSGTAAVKGV<br>GNGELKCVSTDVSSS<br>DSSDMESEHGRADR<br>QAGQHKGKGQENLR<br>TADTLPTTLADIVT             |

|                |        |            |     |                                                                                                                                                                                                                                                                                                                                                                                                                                                                                                                                                              |
|----------------|--------|------------|-----|--------------------------------------------------------------------------------------------------------------------------------------------------------------------------------------------------------------------------------------------------------------------------------------------------------------------------------------------------------------------------------------------------------------------------------------------------------------------------------------------------------------------------------------------------------------|
|                |        |            |     | EAYDELVPACLTTRYG<br>GFYINSGTLQFRPASD<br>EGENENDFEDSGLKP<br>KKRKLQGGKDKKIMK<br>KKRDEYGLAKKDEEEF<br>TKSTPPDKSSAKKKKN<br>KKPLSIDKMLKFFHKE<br>KLQQMKEFNSREKEL<br>HSLNAIHAGPAIQAEI<br>QEAHVSSDPLFSLIGS<br>ASADDLLQAVKAAEQ<br>DFDLDDLLEGPQNIC<br>PPGLEEVNGEALVVS<br>VAEKPPALLPDGLPP<br>MLEQHIKDISQAANK<br>IEGQNKMEILSSELNS<br>VLLDEVNSKQLGGK<br>VRSRIFSYLASQLSCSK<br>GTLVKRAKKLH5QQQ<br>DEQMQLLKKLENAV<br>ARSMPEQITRFQNH<br>QAHSEARAAKLEAEK<br>ERAIDGSDEEEERSG<br>KRVFGPRKRFRWNEE<br>IRELLCEIVNVKMMIY<br>DSESPSCSSLEEYLKAF<br>LEADVKSLLWPKGWM<br>QSRILLIETRAKHGHIT |
| A0A0J9YIW0     | DrUBN1 | D. rerio   | UBN |                                                                                                                                                                                                                                                                                                                                                                                                                                                                                                                                                              |
|                |        |            |     | AGGPGADNRRRRLE<br>EDGAAEMSFDRGR<br>MKMMGTGVTTAGD<br>RGGUGKRDSEEPKG<br>KTVRLNLCLSEPEQC<br>SAEFNYSLIQSQQPK<br>KNPPCSKSLDPNDP<br>FNDDEKERLQVEALA<br>KKFESKYGNAGKKRR<br>KDRMQDLIDIGFGYD<br>ESDPFIDNSEAYDELV<br>PASLTTKLGGFYINTG<br>TLQFRAASESEGEDK<br>VKDEKPRIRDGEEPL<br>MKRRKKDVGIEEKK<br>PRKNKVAQGVAGL<br>SLHRPEKKRKLKLMK<br>DSLCLAAMLRRFTRE<br>KEEIRKQDISSHLGLT<br>SAPNSNNLLQNSHLH<br>IGHANHTDLSADLT<br>ADPAMMSLLSSANE<br>SELQDIMRDLDFSSLD<br>AAPQTPPSCRENGQ<br>VGLGSSLGNKIGVGG<br>LNRGQAGVVSPFTLP<br>NGLPAPLIKRIEDLRA<br>ASRQFDQEGRKFFFT                     |
| NP_001073638.1 | DrUBN2 | D. rerio   | UBN |                                                                                                                                                                                                                                                                                                                                                                                                                                                                                                                                                              |
|                |        |            |     | LNPFLKKSKEEAG<br>AGEQHQCCEPAAAA<br>VRITLTLFEPDHKRC<br>EFFYPVLVKNIRGKVK<br>GLQPGDKKKDLSDPF<br>NDEEKERHKVEALAR<br>KFEKYGGKKRRKDRI<br>QDLIDMGYGVDES<br>FIDNSEAYDELVPASL<br>TTKYGGFYINSGTLQF<br>RQASEEDDFIKEKKK<br>KSPKKRKLKEGGEKIK<br>KKKKDDTYDKEKKSK<br>KSKFSKAGFTALNASK<br>EKKKKKYSGALSVKE<br>MLKKFQKEKEAQKKR<br>EEHKPVAVPSAEAQ<br>GLRELEGASDPLSLF<br>GSTSDNDLLQAATA<br>MDSLTDLDLEHLLSES<br>PEGSPFRDMDDGSD<br>SLGVGLDQEFQRPSS<br>LPEGLPAPLEKRVKEL<br>AQAAARAAGESRQK<br>FFTQDINGILLDIEAQ<br>TRELSSQVRSGVYAYL<br>ASFLPCS KDALLKRAR<br>KLHLYEQGGRLKEPL           |
| NP_001072982.1 | HsUBN1 | H. sapiens | UBN |                                                                                                                                                                                                                                                                                                                                                                                                                                                                                                                                                              |



|             |        |             |     |                                                                                                                                                                                                                                                                                                                                                                                                                                                                                                                                                             |
|-------------|--------|-------------|-----|-------------------------------------------------------------------------------------------------------------------------------------------------------------------------------------------------------------------------------------------------------------------------------------------------------------------------------------------------------------------------------------------------------------------------------------------------------------------------------------------------------------------------------------------------------------|
| NP_775840.3 | HsUBN2 | H. sapiens  | UBN | RREAEPGPEREPEYP<br>REPPRLEPQPYREPA<br>RAEPPAPREPAPRSD<br>AQPPSREKPLPQREV<br>SRAEPPMSLQREPPR<br>PEPPPPFPPLPLQPPP<br>PRESASRAEQPPRPP<br>RETVRLELVKDPDTE<br>SCVEFSYPPELLCGEQ<br>RKKLHTEDPFNDEH<br>QEROEVEMLAKKFE<br>MKYGGKPRKHKRDR<br>LQDLIDIGFYDETD<br>FIDNSEAYDELVPASL<br>TTKYGGFYINTGTLOF<br>ROASDTEEDDITDNQ<br>KHKPPKVPKIKEDDIE<br>MKKRRKRKEEGEKEKK<br>PRKKVPKQLGVVALN<br>SHKSEKKKKRYKDSLS<br>LAAMIRKFQKEKDAL<br>KKESNPKVPVTLSTPS<br>LNKPPCAAAALGND<br>VPDLNLSSGDPDLPIF<br>VSTNEHELFEAENA<br>LEMLDDDFDRLDLD<br>ASDGSPLSESGGENG<br>TTTQPTYTSQVMPKV          |
| NP_080942.1 | MmUBN1 | M. musculus | UBN | LNPAFLKKSKEEVG<br>GTEQHQCCEPAAAA<br>VRITLTLFEPDHKRC<br>EFFYPVLVKNIRGKVK<br>GLHPGDKKKDVLDPF<br>NDEKERHKVEALAR<br>KFEEKYGGKRRKDRI<br>QDLIDMGYGYDESOS<br>FIDNSEAYDELVPASL<br>TTKYGGFYINSGTLOF<br>ROASEEDDFIKEKKK<br>KSPKKRKLKEGGEKIK<br>KKKKDDTYDKEKKSK<br>KSKFSKAGFTALNASK<br>EKKKKKYSGSLSVRE<br>MLKKFQKEKEAQKKR<br>EEHKPVAVSSIEAQ<br>GLRELEGTSDPLLSF<br>GSTSDNDLLQAATA<br>MDSLTDLDLEQLSES<br>PEGSPFRDMDGSD<br>SLGVGLDQEFQRPSS<br>FPEGLPIPLEKRVKELA<br>QAARAAEGESKQKFF<br>TQDINGILLDIEVQTR<br>ELTSQIRSGVFAYLAS<br>FLPCS KDALVKRARKL<br>HLYEQGGRLKEPLQK        |
| NP_796159.3 | MmUBN2 | M. musculus | UBN | RREADFAGAEREPPR<br>LEPQPYREPARAEPA<br>PRADAQPPARDKLP<br>QREVSRAEPPMALQ<br>REPPRPEPPPPPLPLQ<br>TPPPRESASRAEPPPR<br>PPKETVRLELVKDPDTE<br>DESCVEFSYPPELLCG<br>EQRKLVHTEDPFTD<br>EHKERQEVEMLAKKFE<br>EMKYGGKARKHRKD<br>RLQDLIDIGFYDETD<br>PFIDNSEAYDELVPAS<br>LTTKYGGFYINTGTLO<br>FRQASDTEEDDFTDN<br>QKHKPPKVPKIKEDDI<br>EVKKRRKRKEEGEKEKK<br>PRKKVPKQLGVVALN<br>SHKSEKKKKRYKDSLS<br>LAAMIRKFQKEKDAL<br>KKESTPKVPVTPSSSS<br>LPKPPCVTTALGDDIP<br>DLGLNSADPDLPIFVS<br>TNEHELFEAENALE<br>MLDDDFDRLLDATS<br>DGSPLSESGGENGNT<br>THPTFPSQVVPKVVP<br>TLPEGLPVLLEKRIEDL |

|                |        |                |     |                                                                                                                                                                                                                                                                                                                                                                                                                                                                                                                                                               |
|----------------|--------|----------------|-----|---------------------------------------------------------------------------------------------------------------------------------------------------------------------------------------------------------------------------------------------------------------------------------------------------------------------------------------------------------------------------------------------------------------------------------------------------------------------------------------------------------------------------------------------------------------|
| XP_024392537.1 | PpaUBN | P. patens      | UBN | TTVSVWKKLVSDAEG<br>KLVSARVSDAPAGAN<br>PALEARIAPEKGAGS<br>VTGNDDLPQVPNR<br>FSSVIERIERLYKGGDS<br>DDGGAEDTPDEDQY<br>DTDDPFIDDEELNEVF<br>MVVEAKTKHTGFFIN<br>RGALEKISVSPSPPAV<br>QPKKRRRRESKKDKK<br>DEKEVKRRMKGRIM<br>QGSRQFPSSHNFNA<br>GGETQVSNHTLNKA<br>QSSDPPEISSDSDAFR<br>QGSAGPSRVSYKQEK<br>LDFADVDNNGGVVE<br>RLLETTAMLNTESVF<br>GGGRNIQKSEYRYGS<br>SFEEKWKQAAREPK<br>GVMKVSESLMKMI<br>QQSGKEDGAKDSOG<br>GAGHAVAGYTKSLSP<br>GPKEPSGRRGWPK<br>GTVMERAIQDLIKMV<br>ALLCPPSPEGEEQAL<br>SQPGAKAKRLPREVK<br>TRLAKVARLAQAKQG<br>KVPDELVERLHGILGH                     |
| -              | PpUBN  | P. polycephala | UBN | CYRFSISLSETKGVVN<br>YADLMSQERKKRHLL<br>SNPPSDPSTNPITTTT<br>TSEDTPKTPPLNGSV<br>DEASIDTAGDESVEA<br>ADESVEVEDEGNAS<br>ASKDVKKSSPKRSMP<br>VLPKKTTNRLVQIID<br>KIEKMYTTGGDSFMN<br>GYDTSDFSIDDSDMV<br>EKPTEEVENEYGGFFV<br>HSGELKTRKKKRVSDF<br>QEDSPDKNKSRTKK<br>LKIEDEKGSPEKDKK<br>NDENGKKSDDKKPKD<br>KKKEETPKDKEKKKED<br>STKDKEKKKEDPGKE<br>KEKKKEEKEETKDSEE<br>EKAALRQKLLQTEEKI<br>EQAIKELETEAKKKIVP<br>GQTKRIPAEALAPQLS<br>NLYEALQQTANGFIT<br>DRLLDRLVEFLPFKKS<br>TIKMHKKSKHKAHV<br>DTMEVELKRLEDAYD<br>TEYNLLRAAVFNTMA<br>EEQKKQQNPPPTD<br>PPADPSNPAEPKYA         |
| NP_009774.4    | ScHpc2 | S. cerevisiae  | UBN | KQTKSSGKMQTQTD<br>TNAEVLNTDNSIKKET<br>GSDSEDLFNKFSNKK<br>TNRKIPNIAEELAKNR<br>NYVKGASPSPIISGSS<br>STSPSGPSSSTNPM<br>GIPTNRFNKNTEVELY<br>QHSPSPVMTTNKTD<br>TEEKRQNNRNMNDNK<br>NTPERGSSFAAKQL<br>KISSLLTISSNEDSKTL<br>HINDTNGNKNSNAA<br>SNNIPSAYAEHTEG<br>NSIESLIKPPSSPRNKS<br>LTPKVILPTQNMGTI<br>AKDPHLGDNTPGILIA<br>KTSSPVNLDVESTAQ<br>SLGKFNKSTNSLKAAL<br>TKAPAEKVSLSRSISS<br>VTNSDSNISSSKKPTS<br>EKAKSSSASAILPKPT<br>TTKTSKKAASNSSDST<br>RKKNASNKTTSAIKKE<br>SNAGSKLNTVKKENS<br>SLSSIKATEKEKDKGG<br>NSTEAKNSTSNVRKE<br>PTAKSPKRLVAAPTYS<br>PPKILQTAETKAKEPSI |

|                |          |              |     |                                                                                                                                                                                                                                                                                                                                                                                                                                                                                                                                                                                   |
|----------------|----------|--------------|-----|-----------------------------------------------------------------------------------------------------------------------------------------------------------------------------------------------------------------------------------------------------------------------------------------------------------------------------------------------------------------------------------------------------------------------------------------------------------------------------------------------------------------------------------------------------------------------------------|
| XP_001017549.4 | TtHpc2-1 | T. thermophi | UBN | <p>PNFGFCQDKQIFQH<br/>DLNENNINQQHQKIL<br/>SKIEEKPNIKQNKHILE<br/>RMHDEQSHDEEHLE<br/>RGYEWIQSTNEEDFQ<br/>IMKNVCYLEQFLDMY<br/>DDLEEDFLHLDIPQF<br/>MQYLESESESESIQS<br/>DEEEMEDQFEDNDLI<br/>QNVNTHRYSESRLLN<br/>TNLKNEQGVKKTDEF<br/>QKFDQPANNAESTM<br/>NAEAVVKNNKIITNM<br/>KNKGKNQMSQNSID<br/>SQREDDIYSQINQKG<br/>KAKRYQSSALLAQE<br/>QFIRISKYGDIALTSNI<br/>ARKNPKSDDFYDQED<br/>SFIDDDQVDTELKQL<br/>AICEADYDDFFMVEG<br/>GLQDLVKSSEFRERLK<br/>DIQEYRDTKKIENHLK<br/>TDKKEKQPNPKIKISS<br/>ENSKNLSFNEKKQQG<br/>LNLLMDAEDEEDDK<br/>QJKKKKNAAKNKKQ<br/>FDLLHLKQPTFQEEM<br/>LQNAQNTKIQPAKT</p> |
| XP_001010706.2 | TtHpc2-2 | T. thermophi | UBN | <p>GEDVADSNSSDIMEE<br/>EENEVDKPSIAKFSNL<br/>NNNNNNKLDQVNG<br/>NKNSVNGSADKKKK<br/>KQRSTNKVSIEELTKQ<br/>IKQNQSKRVNGQED<br/>GVVIKANFDWVNYN<br/>TTEDKTLNLYSDFLKL<br/>NGENNLDYFKLDLVE<br/>FEDVNIVQHHSQVSS<br/>ITDDLKRLRYGQJEN<br/>IQRIAKKSGAISKGEG<br/>TNVNFREDELYDQND<br/>PFIDDEYNNTSVKV<br/>SHRMQLAEVFIDDFR<br/>TFDGLDKDFIKSEIYK<br/>NRVEIMHNLEKKNEI<br/>EEETENFKKKKKPN<br/>PPSNPAISSNNLSSN<br/>LANNSLTAALNSATA<br/>TLNNKIQQKATADVE<br/>KDLNQVESVKTQEEK<br/>KFKKDNVNNTTSLSS<br/>GOQLQNAQNIQAA<br/>GLNQNLQSVSGSVN<br/>AQSLPQAVQASNLLL<br/>GADLSTSLSQLLSQ<br/>AQSSNNNNLLQNA</p>        |
| XP_018092158.1 | XIUBN1L  | X. laevis    | UBN | <p>AVKRQRSEEQESETS<br/>VAATVRISLTLFEPDQ<br/>KRCPEFCYPELLRNLR<br/>GDGKGLHGDKSQK<br/>KVSVSIEEEAEKKEV<br/>ANIAKRFEKYGNKK<br/>RRDRKQDLIDMGY<br/>GYDESDFIDNSEAYD<br/>ELVPASLTTKHGGFYI<br/>NSGTLQFRQASESED<br/>EVVKEKKKSPKMM<br/>KDRGEVKKKKRAEE<br/>KKCKKNKPKPGFTA<br/>LNGTKDKKKKSAIF<br/>KMLARFEQEKNAQK<br/>NIITPPSPTTLKPSSIS<br/>QQPILSQPTQEAEP<br/>APDAAVSTHVSELLK<br/>AVSAIDSVREKQMMEN<br/>IHNGPPEKKHGVQG<br/>GSTSEEAIKTPASLPD<br/>GLPHALEKRIKELTKA<br/>VKASEGEKKGLFSQE<br/>MNSALLDIYLSRELSS<br/>SLRLAVFTHLASVLP<br/>GKDTLVKWATRLYLQ<br/>KQGGRLREPLRLKE<br/>AVARTMPEQITKYHE</p>     |

|                |          |            |        |                                                                                                                                                                                                                                                                                                                                                                                                                                                                                                                                                   |
|----------------|----------|------------|--------|---------------------------------------------------------------------------------------------------------------------------------------------------------------------------------------------------------------------------------------------------------------------------------------------------------------------------------------------------------------------------------------------------------------------------------------------------------------------------------------------------------------------------------------------------|
|                |          |            |        | KPRETGPVLSVEQQN<br>QQTPPPLQPPAQR<br>PQPRAAHQVMFQPR<br>PPQALGHRLQREPS<br>SPALEAGICHVLDKP<br>QGDDTHQLAGTVRL<br>QLALTDPTTEGCAEFS<br>YPDLLKEQKAGRALI<br>PVTRKETAGLSKPPAS<br>NDPFNDDERERQVE<br>NLAKKFEAKYGGKSH<br>HHRKDRVQDLIDIGY<br>GYDETDPFIDNSEAY<br>DELVPASLNTKYGGF<br>YINTGTLQFRQASDSE<br>NEDFVENKKHKTSKV<br>SKIIDGERSLKKRRK<br>EENTEKEPKMKMAA<br>KQJGVMAFNSHKPD<br>KKKKKLYKDSVALAA<br>MLRKQKEKDAIHKK<br>VNKPNPPTVTVVNTA<br>PKLVTAAASNDLSDLGL<br>GADPVLAIFGSEREL<br>MQEAESALEMMLSDF<br>DFDKLLDSASNDSPA<br>SGGENSRVGQSLNPS<br>EVQLPKQVPLPEGL       |
| XP_018116614.1 | XIUBN2S  | X. laevis  | UBN    |                                                                                                                                                                                                                                                                                                                                                                                                                                                                                                                                                   |
|                |          |            |        | AAAAAARVPGAVAA<br>APGVTSAPSALAPTQ<br>PPATAAAVSEAATPC<br>QRQLFTVELRPGETTI<br>VSWKLLKEAGHTAA<br>APPVAVEPAFAAHA<br>GPSGPAHPAENDPK<br>DPTQPNRNFNAVIEKIE<br>RLYMGKHSSDEEDLN<br>DVPDDDYDTEDSFI<br>DDAELDEYFEVDNLK<br>TKHDGYFVNKGKLEQ<br>IEPGTAANVAPKKRR<br>RKDASSYLESNHLGP<br>IDYFDIGDVPEKSSAR<br>GTVQTGKQLVSSNVS<br>SYGQYHEDNRVVKN<br>KISGPGGAPKRSSEF<br>SGDAAARAKIHKDVS<br>HAPLELRDMEKHKA<br>AALPVDYAHKSKISSET<br>FDYAYPAYRDKGTSG<br>QLDFQQRKISRENOG<br>PSNRTYRKEKHGTNE<br>YPGIAMATAVYSTQT<br>MHPVVGREGSGTKP<br>KGTRLERAIIRDQKIV<br>AEYRPPTIDINEVDPN  |
| XP_020405992.1 | ZmUBN    | Z. mays    | UBN    |                                                                                                                                                                                                                                                                                                                                                                                                                                                                                                                                                   |
|                |          |            |        | WEPLAPSKAEQEFHL<br>SQTYHDGLKLQAKD<br>YDKARELLESILKDPIT<br>NSKVETIANDNHLHH<br>LRFALKNLATVFLEL<br>GSSHYENALNCYLQA<br>IDLDAKDSVLWNHLG<br>TLSCSMGLLSIRWAF<br>EQGLLCSPNNWNC<br>MEKLEVLIAVGDEV<br>CLSVANLILRHWP<br>SRALHVKKCIEDTDS<br>APFAPKGIDKLEPQH<br>VRLKFLGKRKVSMDN<br>QDMDATSKKLKRV<br>QFKLPEASWVALLNIL<br>IGIVHPSRETGVISADI<br>PITIELSLSTEAVMQG<br>MKKKDHCVDSDSSN<br>VSVKDCNIERESGGS<br>VKEKEPVFSEHPQE<br>RRSTRLERLRNQKPEK<br>EGLEFDNSKDPSSDIL<br>QYLEKFLKRGFDRES<br>AGSFCNEESDPISEHA<br>VVSNFVKENLENYGA<br>YHMGHLLLEYIANKC<br>EHVLSRETALKILELEK |
| NP_195008.6    | AtCABIN1 | A thaliana | CABIN1 |                                                                                                                                                                                                                                                                                                                                                                                                                                                                                                                                                   |

|                |           |                 |        |                                                                                                                                                                                                                                                                                                                                                                                                                                                                                                                                                       |
|----------------|-----------|-----------------|--------|-------------------------------------------------------------------------------------------------------------------------------------------------------------------------------------------------------------------------------------------------------------------------------------------------------------------------------------------------------------------------------------------------------------------------------------------------------------------------------------------------------------------------------------------------------|
|                |           |                 |        | QWETLAPTKEAQEFH<br>LTQEYHEGLQLQAK<br>EYSKAQRNFEAVLRD<br>PLMSNAQVDGNTRD<br>GHLLQLRFLALKNLAT<br>VFLEQGSMMHYESAIN<br>CYLQAVEIDTKDSVV<br>WNQLGTLSCYIGLLSI<br>ARWAFEQGLSCSPN<br>NWNCMEKLEVLIAI<br>GDEISCLSVANLILRN<br>WPSHARALLVKTVE<br>ESERIPFAPRGIDRLEP<br>KHVRLKFPNKRKRSIDE<br>PYDGADIKKRNQTV<br>ELLLPASLSSLVDAIL<br>KILRPLSAKGSSENSPIN<br>EKQSRSAEFPSRNNE<br>LHGKGETDDLNMKG<br>RYTDMRMRINVSSES<br>ENVGDPFIGKGMGM<br>LLAGNQSSSTAENPE<br>KIFHGKEKEGSDDEV<br>HPQERRSTRLERLSR<br>KPEKEELDYPLSKNRA<br>EAAFQILKPFIVVGLE<br>KKDYNYNQNTNTVLL<br>MDTLEFGVNDISRF |
| W1P7Q2         | AtrCABIN1 | A. trichopoda   | CABIN1 |                                                                                                                                                                                                                                                                                                                                                                                                                                                                                                                                                       |
|                |           |                 |        | LNEDESSDGENSVII<br>LDSOTEPEDGAGGEE<br>DEDNGEDSEEEDEED<br>SDEEEEDSDSSVDOT<br>ESVNSVWSNVDEEN<br>GEEITTEAAEKIKKF<br>EKAIFSADNDSETGR<br>RILEKLLNDIAIATYNQ<br>ENPDFELDEPPRLAK<br>MLQVFIASHRNLAKE<br>CEKEVENADEKEKEQ<br>LKSEEIQLCQVLAYE<br>PNSSDIWLDVALKSIE<br>FGDLNFSKYAFKRCE<br>LKESLESHATLLYLTCD<br>YNESLMIMKQFQEQ<br>NDVLNDKLKYLKHKIR<br>STNQYYKLSCDRIFEE<br>DEVYADVQSVEKRKI<br>QDFDERIEALRSRVV<br>GKIEQRDVFDRDEEE<br>KCSVIPRIEADQDLQ<br>TVCTIFCDLFDRIHAY<br>SHCRHQLIEFTEWES<br>RRDHLDLVDTVEHLV<br>DVVECVEDISQKVEEL<br>ENLKRGAAGRKKQ<br>QQKDEKEYLASWR   |
| NP_001299995.1 | CePICD-1  | C. elegans      | CABIN1 |                                                                                                                                                                                                                                                                                                                                                                                                                                                                                                                                                       |
|                |           |                 |        | YSEYESEYDDTDG<br>DDDNNNNNNNNNNI<br>NNNNNNDKFDNMSI<br>EAQETYNMKLYSNAL<br>KHQQNNNDYLOAQQL<br>YQELLQSPMIERINPQ<br>SKKSILSSQMATLKYS<br>TLKNMANINEAIDNK<br>ELSKLSTQAIIDLGR<br>DVSLWYSIGKISMELE<br>KWNISRLALERAQIS<br>PTHWLSLEKLIELLYVI<br>GDDNSCKNIEQRILQ<br>EQPSNLKAIKLLIQR<br>SNQSNYNEINEILNNI<br>LISNQNSKSYIQLIKK<br>RDRIQQQQQQQQQ<br>QQQQQQQQQQQQ<br>QQQQQQQMIIGKQ<br>PQLTNELDKPVEYIL<br>ENKNWSSLLDLNSIY<br>NEKKESTSSIFSPIEI<br>KLHPSLLGIQLVLDG<br>NEDDVDEMEEEEE<br>VDITPINTVDNKKQ<br>PIAIEITDTSITTATVTA<br>TTSSTNLESSIRPATPV<br>TPTPTINTSNTTTTTT      |
| XP_647263.1    | DdCABIN1  | D. discoideus   | CABIN1 |                                                                                                                                                                                                                                                                                                                                                                                                                                                                                                                                                       |
| NA             |           | D. melanogaster | CABIN1 |                                                                                                                                                                                                                                                                                                                                                                                                                                                                                                                                                       |

|                |          |             |        |                                                                                                                                                                                                                                                                                                                                                                                                                                                                                                                                                          |
|----------------|----------|-------------|--------|----------------------------------------------------------------------------------------------------------------------------------------------------------------------------------------------------------------------------------------------------------------------------------------------------------------------------------------------------------------------------------------------------------------------------------------------------------------------------------------------------------------------------------------------------------|
| EOYA53         | DrCABIN1 | D. rerio    | CABIN1 | EHEDAFRSTKPGQTK<br>EAQEAFAFYHKAL<br>DLQKHDFDESAY<br>HELLKTPLLKEAVASE<br>DEKVGKHPGLMLKY<br>STYKNLASLAVLKDDL<br>DTAMDFYVQAVMLD<br>STDVNMWYKMGKL<br>ALRKVSMPARHAFE<br>VGLHCNPEHWPCLD<br>SLITVLALSDYSCCLY<br>YICKALEKDSGYSKGR<br>VLKEKIFQEQPCLRRD<br>SMKMFSLDISLQYV<br>DVEEEAHSSIVEEAL<br>LRRQROAKLTRHPVA<br>DLQLVQPIKYFTWKS<br>VGESFLAMYKHQNA<br>CLVPRPDFGRIDLS<br>MYRDPDCLLQMPISA<br>PVPAAAAAPSDPPQ<br>PTVPISDPPAPVVLPP<br>APSSPSASLQLYDTVI<br>WYSRVNGALDDKVK<br>KGTKRKRVEDTVETA<br>KRRSARVRNTCKCKE<br>EKIDFQELLKFLPSRL<br>KKFEDDEDEESLSNM                 |
| NP_001186210.1 | HsCABIN1 | H. sapiens  | CABIN1 | HEGSFKSHKTQTKEA<br>QEAFAFYHKALDL<br>QKHDRFEESAKAYHE<br>LLEASLLREAVSSGDE<br>KEGLKHPGULKYSTY<br>KNLAQLAAQREDLET<br>AMEFYLEAVMLDSTD<br>VNLWYKIGHVALRLI<br>RIPLARHAFEEGLRCN<br>PDHWPCLDNLITVLY<br>TLDYTTCLYFICKALE<br>KDCRYSGGLVLKEKIF<br>EEQPCLRKDSLRFML<br>KCDMSIHDVSVSAAE<br>TQAIVDEALGLRKKR<br>QALIVREKEPDLKLVQ<br>PIPFFTWKCLGESLLA<br>MYNHLTTCEPPRPSL<br>GKRIDLSDYQDPSQP<br>LESSMVVTPVNVQIP<br>STVSTNPVAVAEPPV<br>VSYTSVATTSFPLHSP<br>GLLETGAPVGDISGG<br>DKSKGVKRRKISEES<br>GETAKRRSARVRNTK<br>CKKEEKVDFQELLMK<br>FLPSRLRKLDPEEEDD<br>SFNNYEVQSEAKLESF  |
| NP_766137.2    | MmCABIN1 | M. musculus | CABIN1 | HEGSFKSHKIQTKEA<br>QEAFAFYHKALDL<br>QKHDRFEESAKAYHE<br>LLEARLLREAVSSGDE<br>KEGLKHPGULKYSTY<br>KNLAQLAAQREDLET<br>AMEFYLEAVMLDSTD<br>VNLWYKIGHVALRLI<br>RLPLARHAFEEGLRC<br>NPDHWPCLDNLITVL<br>YTLSDYTTCLYFICKAL<br>EKDCRYSGGLVLKEKI<br>FEEQPCLRKDSLRFML<br>LKCDMSIHDVSVSAA<br>ETQAIVDEALGLRKKR<br>QALIVREKEPDLKLVQ<br>PIPFFTWKCLGESLLA<br>MYSHLTTCEPPRPSL<br>GKRIDLSDYQDPSQLL<br>ASSVVVTPVSVVQPS<br>PICTNPVAVAEPPVLS<br>YTSVTAASFPLHSPSL<br>LDTGTPMGDVSGGD<br>KSKKGVRKKTVEES<br>GETAKRRSARVRNTK<br>CKKEEKVDFQGLLVK<br>FLPSRLRKLDPEEEDD<br>PFNNYEVQAEAKLES |

|                |           |                |        |                                                                                                                                                                                                                                                                                                                                                                                                                                                                                                                                                                    |
|----------------|-----------|----------------|--------|--------------------------------------------------------------------------------------------------------------------------------------------------------------------------------------------------------------------------------------------------------------------------------------------------------------------------------------------------------------------------------------------------------------------------------------------------------------------------------------------------------------------------------------------------------------------|
| XP_024373289.1 | PpaCABIN1 | P. patens      | CABIN1 | FSEPLAPTEAQESRL<br>TQMYGEALSHLQHG<br>QJEKAQSLFQSIQDP<br>ISIKAQVEPVSSANT<br>MLQLRYSALKNLAET<br>FSMQGSGHHVEAVD<br>CFLQAAIDGKDVVL<br>WNRLGTLSCALGNL<br>NVARRAFEEGLRCSP<br>RHWSCMEKLVIELIA<br>VGDESACLSVAKRLLK<br>LSPSHPRALQIQHAIE<br>QGVSMRPFDPGPKSG<br>HETSSVLKIGPRGFDL<br>LQPEYFGLSFDNKRKL<br>ENAYETVQHQQKRK<br>VHSIDVHLPEASWFA<br>LVNAVTDVLKGGRR<br>WKDDPEPLNTQIVVS<br>PGGNQSEQQKAASA<br>GISAGLVNATVKFSV<br>HKSHPIIVDLNSEYKE<br>QVAGEEAEIISEDCLN<br>SSSTKTSEEVSRGLG<br>VAPVLAEPRESASE<br>NRAEGHKDVENASV<br>HQKQGGTGEKQEAS<br>KLPDLMKPSDPTTEW                       |
| -              | PpCABIN1  | P. polycephala | CABIN1 | KKHKHTPTKGDALEA<br>ENFALYEKALRHQYA<br>GEYQEAELKYSILAS<br>PIVNEFVEVSKRDDLY<br>YTLPVVTLRYLAYKNF<br>ASLCETTSRKTEAMEY<br>YAKALDVDRDWWV<br>WYHMAVCMMSVERL<br>QLARFALEQGLKASP<br>DHWLSIDKLAEVFIL<br>GDYGACMNVDRIIL<br>ELEPGFSKAILLTKM<br>MSENPDKFKVEAFL<br>WEAGDLGDCNIDDL<br>VSARSKRQKVADFDH<br>DTVEEPPREFVLKEKT<br>WSSFADLLYDIYKEM<br>TSEKGSKFLNDPIYIT<br>DPAPLSPPGSPAASA<br>LNDSFPSLNFTTPSSG<br>TDLNSGSGTASSGT<br>NQPGLNESATNLNTS<br>ATNLNTSATNLNTST<br>SNLNTSATGVNSGET<br>EAPNVESGRKSTRGR<br>KPAADSATRQSARVK<br>EIKHDKISSDLDEYLN<br>KLLNTQEESDETTASS                  |
| NP_012674.1    | ScHir3    | S. cerevisiae  | CABIN1 | QYEAEEHSRELQIEQS<br>FNILQDALIDLKKNDF<br>EKSDSKFQELFQIDVV<br>KPDWRGMYRNSPT<br>LDNLRYLRYNRGMY<br>YHLYLENNYERLNSQ<br>ELVNCILKAVENLVESI<br>QHSDADFAVTDLLAR<br>IFKSFNSVKLERLISEYE<br>FTKQENLSLLGRHRK<br>FLLNDLTLMMNNYV<br>ELTNKLLVPNLSDNTI<br>FERVHLEKYKDIKPEPL<br>AFGPILSRISEMKKQD<br>EEIMKKLDVFNVTLN<br>EESWDEVAKALKNLL<br>PSVKTSSLIGRNMDP<br>YNEIEEPIEAVKFELSE<br>AINNTPSLDRESEKQE<br>EEQDNESVRADDKSG<br>NLAPSDIQTNEEARP<br>NKRTDEHIDSTKPLQ<br>RSSKRFRKEREQENSKE<br>LVMDVHKRFFGEFNT<br>LLSYIHILPFCDFDTFA<br>SKFIIGSSDKQPEKFIP<br>YTDLYECLKSWSSRYT<br>DIFNQNDYLSSGSNE |
| NA             |           | T. thermophila | CABIN1 |                                                                                                                                                                                                                                                                                                                                                                                                                                                                                                                                                                    |

|                |          |            |        |                                                                                                                                                                                                                                                                                                                                                                                                                                                                                                                                                             |
|----------------|----------|------------|--------|-------------------------------------------------------------------------------------------------------------------------------------------------------------------------------------------------------------------------------------------------------------------------------------------------------------------------------------------------------------------------------------------------------------------------------------------------------------------------------------------------------------------------------------------------------------|
|                |          |            |        | EHEETFKNHKTQTKE<br>AQEAEAFALYHKALD<br>LQKLDHFDESSQAYH<br>QLETRLLEAIPAND<br>EKEGLKHPGLMLKYS<br>TYKNLAQLASQRDDL<br>ETAMEFYIEAVMLDS<br>TDVNLWYKIGCLALR<br>LVRIPLARHAFEEGLQ<br>CNPDPHWPCLDNLITV<br>LYTISDYTTCLYFICKAL<br>EKDCRYSKGLVLKEKI<br>FEEQPCLRRDSFRMF<br>LKCNMSEIHEVDVSDE<br>EARTIVEEAMDRLRR<br>ROALTVRKAEPDLKL<br>VQPIPIYFTWKCLGESL<br>LNMYRHLISCEPPRPS<br>LGKRIDLTEYKDPAVL<br>FHPPPVSPDTIIVDP<br>LMISTPPTPVSVIEMP<br>SVLPTATPPASSSNVI<br>DTSAVQADSSTGDKT<br>KKGVKRKKISEDAGET<br>AKRRSARVRNTRCKK<br>EERVDFQELLKFLPS<br>RLRKSDEEEDDPFCS<br>FETQSEMKEHYAN |
| XP_018117354.1 | XICABIN1 | X. laevis  | CABIN1 |                                                                                                                                                                                                                                                                                                                                                                                                                                                                                                                                                             |
|                |          |            |        | WEPLAPTEAQEFAL<br>SQKYHEGLKLQQKD<br>YAKARELLEDVLKDPL<br>ISNVQADNIGSDQHL<br>LQLRFLTLKNLASVFL<br>QQGFEFYDNALHCYL<br>QAVELDSNDSVWWN<br>HLGTLSCMGLLSVSR<br>WAFEQGLVCSPNN<br>WNCMEKLEVLISIRD<br>EVACLSVANLILNSW<br>PSHHRALHVKKTIEC<br>AEPVPFAPRGIDILEP<br>KHAKLIFSNKRKSVDD<br>EICQEIGTKSKQSAT<br>LQLNEAKWLALLDGI<br>LSLISANTEKAGEYNC<br>SNTVDRCSISEGSAKG<br>LAYNIIDVVISTDLKS<br>VETAGGNGNDSHHG<br>EILPYDCKATVKEKDG<br>NSDREHPHERSTRL<br>ERLRSRKSGBKDENG<br>DGKDISHAMTQFLES<br>FILKGPPSPVEKAYCSG<br>NADASNPDTHNYTS<br>NEEANDLKQFLCKISK<br>NFGPHHIGYMLLEE          |
| A0A317YDT9     | ZmCABIN1 | Z. mays    | CABIN1 |                                                                                                                                                                                                                                                                                                                                                                                                                                                                                                                                                             |
|                |          |            |        | MVEESASASEASVIQ<br>TLTEPATEIAQTLEPN<br>LASIEATVESVQGGT<br>ESTCNDANNNNNA<br>DSAAATEVCDEEREKTL<br>EFAEELTEKGSVFLKE<br>NDFAEAVDCFSRALEI<br>RVAHYGELDAECINA<br>YYRYGLALLAKAQAE<br>ADPLGNMPKKEGEV<br>QQESSNGESLAPSVV<br>SGDPERQGSSSGQEG<br>SGGKDQGEDGEDCQ<br>DDDLSDADGDADED<br>ESDLDMAWKMLDIA<br>RVITDKQSTETMEKV<br>DILCSLAEVSLERDIE<br>SSLSDYKNALSILERLV<br>EPDSRRTAELNFRICI<br>CLETGCQPKEAIPYQ<br>KALLICKARMERLSNE<br>IKGASGSATSSVSEI<br>DEGIQSSNVPIYDKS<br>ASDKEVEIGDLAELAE<br>DLEKKAT                                                                        |
| NP_974699.1    | AtNASP   | A thaliana | NASP   |                                                                                                                                                                                                                                                                                                                                                                                                                                                                                                                                                             |



|                |          |               |      |                                                                                                                                                                                                                                                                                                                                                                                                                                                                                                                                                         |
|----------------|----------|---------------|------|---------------------------------------------------------------------------------------------------------------------------------------------------------------------------------------------------------------------------------------------------------------------------------------------------------------------------------------------------------------------------------------------------------------------------------------------------------------------------------------------------------------------------------------------------------|
| XP_006856185.1 | AtrNASP  | A. trichopoda | NASP | AVVVEMAAEPSASV<br>DGALSKGMDLGSQV<br>GEASGSQGIEGSSEK<br>ALEFADELMEKGREA<br>IRSDDFVEAVDCLSRA<br>LEIRVQHYGELAPKCA<br>MSYYHYGRALLYKAQ<br>EESDPLNVSVTMAKK<br>AASSSGPGKMDIDLS<br>KGKGVANGEASTAS<br>DGLKDSSNKGKESEG<br>SNGNEENDESSEDD<br>GDGVEDDQGVDTGE<br>EEEESDLDSWKMLD<br>IARVIEKNPVDTLKVV<br>DVISTLGDVSLEREDF<br>ETSLGDYFKALSILESL<br>VEKDNRLQALFNFKI<br>CLAMQLADRPADAV<br>KYCEKMSVCEARLQ<br>RLTSEVSESTAKTTSV<br>DNESFSVALEEDITKS<br>SEGNDSTSSVQEKV<br>SEIETLKMILLVDLKEKL<br>EDLQQMMSSLTNPLI<br>QATEKLSTIAEKAKE<br>DSSMSSRMGTETCG<br>FDSPKLTITTTTSTKE      |
| NP_496380.1    | CeNASP-1 | C. elegans    | NASP | MDTENIADASDIRVK<br>DASGDSDEKNGTTT<br>EEETVEQKEKRLAELL<br>AAGRRLKVNIDDKA<br>SDSLSEATELSSEIYGE<br>NHENTFDSLYYYGMA<br>TLELAKEESQLLKGPG<br>EKESGDEEQAGNSDD<br>KTDEENGETEKEDEGE<br>ESGEEEDDDDTMKL<br>SWEILETARCIAAAKI<br>EALAEQSGISAIEEW<br>NLKLADVLVLLGEHGI<br>SDGKYTQAFEDLDRA<br>LNIQRNVLPSSRKIA<br>QTYLIGNACASDANY<br>DETVQYFGKTKDVLIA<br>RQTELKHELARGVDD<br>KEKKSEFENELKELEE<br>MMPGVEEMIADAV<br>HSAAQVEETKKAICA<br>QFEGFTQVLAKLPQE<br>AGDQKEANDISSLVR<br>RPAKRAVDAPTDNQ<br>AVKKEKEEGTTSI                                                                |
| NP_506298.1    | CeNASP-2 | C. elegans    | NASP | ETIAKNVDSTGEEKVA<br>MTNVAEETTPTSDSA<br>TTNEKTASENSPTEA<br>AASDVKDVAEASTGA<br>QETNTSSETPAVVED<br>EKASMEVSIGTSIEDS<br>ETSQKEIEGELVVPEN<br>PVEEISPEQKRKSLSE<br>NIIAGRRFMRTDVFD<br>KAVDVLVSAASIAAE<br>VFGDAHEDTFEANFL<br>YKGALLEVGKLEDRLV<br>ANALTDVPKMAEGE<br>EEVDQDGVENPEDVP<br>QDERAEIKQVEEAL<br>GVASEEPETVADEAV<br>KTEQKEAEEDSVEKD<br>VENSDEQNQEVEEVV<br>ENEATVDPTEDVEME<br>GVEEVNDEKEVGQT<br>AEVDGEAEEDDEAED<br>DEADSMKLAWELLET<br>SRCIADKKAASLAAES<br>TVDGEAIKMWKLNL<br>ADVLTSLSGEHGIADSK<br>YEQAQKDLTEAISQIT<br>VHLPATSRVIANTHHL<br>LAKAFSSDSLFEQAAA |

|                |        |              |      |                                                                                                                                                                                                                                                                                                                                                                                                                                                                                                                                                   |
|----------------|--------|--------------|------|---------------------------------------------------------------------------------------------------------------------------------------------------------------------------------------------------------------------------------------------------------------------------------------------------------------------------------------------------------------------------------------------------------------------------------------------------------------------------------------------------------------------------------------------------|
|                |        |              |      | ATTTTGTKKDEKSKVE<br>IGEAGEGTFDEYEE<br>GEEEGEEGEEEEEE<br>EEEKDKETIIKSAEGN<br>EKAGDLLMKEKDYSS<br>AGLYCVALKNLSSY<br>GALSPKVAHLYVKYG<br>NSLILTYKQESENLM<br>NLLGSKIKEIAEKGED<br>STTSSTPPQTTTTTT<br>TTTTTTTTTPTEDA<br>PDKNASDKKNSKKEE<br>EESEDISTEESKPVNK<br>LNTKENEDDEATPIQI<br>AWEVLETARVIYEKEK<br>DKQIELSDVHVSLGDL<br>FIDSDQIENAIIEYDK<br>ALRIRKDIRDNDLRSI<br>AEIHYAMGLAFHVD<br>NKAPIAEKHRTAIDL<br>LGDQLNKIQQLNGE<br>TDTDKLSLADEIQEL<br>KNIIVDLQGRLEVP<br>IDTSNEPVPKELQQD<br>EQQPVFSTASQNP<br>KPGTPVNTFGVVGKS<br>ARRSITPQTNNSSSS<br>TPSTPNKFTPIETTTT |
| XP_629898.1    | DdNASP | D. discoideu | NASP |                                                                                                                                                                                                                                                                                                                                                                                                                                                                                                                                                   |
|                |        |              |      | VSSPSKTVAPEPVA<br>DTPDNAPAVSTEGS<br>GKAEQERAEKILKKE<br>LFSQGSRNFLVKSDE<br>AADELQVCQLYEEV<br>YGELADELGQPLLYA<br>KALIAMALDENKVID<br>VPDEAADDDEDVD<br>DDEESAEDGAAKKE<br>EKKDTKEAANGASS<br>NGKELDTKEGSDEA<br>DSTGEAEQAQSDK<br>SKKVPTGVDEVSSN<br>GGGGAAVNDDERPS<br>TSNGEVTASCSNGAA<br>PAVEEPEEEEGVSGS<br>LQLAWEILEAAQIFS<br>RQGLSGLPYLAEVQT<br>ELANIEFFENGILEAAR<br>EDYEKALKIHGELPTR<br>NRRALAEHYKIGLTY<br>LMQQLNKEGATLR<br>QSSVJEEIEAIEKGD<br>EPSERDRNNMLDLEE<br>TKQEILAKIQEIEEMQ<br>AQTIAEVRAALDSYIK<br>PMSSGDAAAASSSSS<br>SSANGAASSSSSSSKG          |
| NP_001246993.1 | DmNASP | D. melanoga  | NASP |                                                                                                                                                                                                                                                                                                                                                                                                                                                                                                                                                   |
|                |        |              |      | MPEETGATSTAERM<br>EEKPCSSSTGDSSVDV<br>AEEAKKLIGTGSRLV<br>MGDVVSASVVFQEA<br>CAMLAEKYGDTADE<br>CGEAFFFCGKALLELA<br>RMENTVLGNALEGV<br>PEESSEEGEKQDDSKI<br>ESADNLDGDDDGDE<br>DEDDDDAEGDAKD<br>KESEEDVGNLQLAW<br>EMLEVAKVIYKRKDD<br>KEDQLMAAQIHLKLA<br>EVGVESGNYSQALED<br>FNECLTLQKHLPSHS<br>RLLAETHYQLGTTYSY<br>TTQYNQAIEHFNSIK<br>VIESRLAMLQEVIDKA<br>EGEDSAKEEGEFEEEL<br>KQLLPEIKEKIEDAKES<br>QRTAAAASEAIHQTL<br>AGASTSAFPTENGG<br>PSSSTASQ                                                                                                         |
| E9QE69         | DrNASP | D. rerio     | NASP |                                                                                                                                                                                                                                                                                                                                                                                                                                                                                                                                                   |

|                |         |             |      |                                                                                                                                                                                                                                                                                                                                                                                                                                                                                                                                                     |
|----------------|---------|-------------|------|-----------------------------------------------------------------------------------------------------------------------------------------------------------------------------------------------------------------------------------------------------------------------------------------------------------------------------------------------------------------------------------------------------------------------------------------------------------------------------------------------------------------------------------------------------|
| NP_001182122.1 | HsNASP  | H. sapiens  | NASP | LVSADKIEDVPAPSTS<br>ADKVESLDVDSEAKK<br>LLGLGQKHLVMGDIP<br>AAVNAFQEAASLLGK<br>KYGETANECGEAFF<br>YGKSLLELARMENG<br>LGNALEGVHVEEEG<br>EKTEDESLVENNDNI<br>DEEAREELREQVYDA<br>MGEKEEAKKTEDKSL<br>AKPETDKEQDSEMEK<br>GGREDMDISKSAAEP<br>QEKVDLTLDWLTETS<br>EEAKGGAAPEGPNE<br>AEVTSKGPEQEVPA<br>EEEKSVSGTDVQECC<br>REKGGQEKQGEVIVS<br>IEEKPKVSEEQPVVT<br>LEKQGTAVEVEAESL<br>DPTVKPVDVGGDEPE<br>EKVVTSENEAGKAVL<br>EQLVGQEVPPAEESP<br>EVTTEAAEASAVEAG<br>SEVSEKPGQEAAPVLP<br>KDGAVNGPSVVGDDQ<br>TPIEPQTSIERLTETKD<br>GSGLEEKVRAKLVPS<br>QEETKLSVEESEAAAG    |
| NP_001074944.1 | MmNASP  | M. musculus | NASP | VSADKIEDAPAPSTS<br>DKMESLDVDSEAKKL<br>LGLGQKHLVMGDIPA<br>AVNAFQEAASLLGKK<br>YGETANECGEAFFY<br>GKSLLELARMENGVL<br>GNALEGVHVEEEEGE<br>KTEDESLVENNDNVD<br>EEAREELREQVYDAM<br>GEKEAKKAEKSLTKP<br>ETDKQESEVEKGGRR<br>EDMDISEPEEKLQETV<br>EPTSKQLTESSEEAKE<br>AAIPGLNEDEVASGK<br>TEQESLCTEKGKSISG<br>AYVQNKEFRETVEEG<br>EEIISLEKKPKETSEDQ<br>PIRAAEKQGTLMKV<br>EIEAIDPQVKSADVG<br>GEEPQDQVATSESEL<br>GKAVLMELSGQDVE<br>ASPVVAAEAGAEVSE<br>KPGQEITVIPNNGPV<br>VGQSTVGDQTPSEP<br>QTSARLTETKDGSSV<br>EEVKAELVPEQEEAM<br>LPVEESEAGDGVET<br>KVAQKATEKAPEDKF    |
| A0A2K1IFP3     | PpaNASP | P. patens   | NASP | TQGSAAVDLEEAQRL<br>FDDGCEFMHNEAFE<br>DAAECFSKALEIRVRH<br>FGELAPECATTYFKYG<br>CALFDKLQEEADPLG<br>ETVNPNPALPSSHPE<br>GSSGKEPEVTGKDPV<br>EEAGGDDDDGDEDDV<br>MGEGEEGKEEEEGDL<br>EDAWKMLEFARVIHE<br>KLSRTIEAVDIITKLA<br>DVNCFKENYEACYED<br>YAKALEMLKQIVEPD<br>SRILAEYFKIAIAKQL<br>DLKPKEALIYCSNAVA<br>VCEARVQRLKHEINN<br>VHTEGVDALGTSEAA<br>SVVDVEHSEPQTNGS<br>MKATEHDNDVINP<br>PTEEKSAESKVNEIK<br>DIEDLLVDLKDKEQEL<br>KEMASAPTLVEQLQA<br>ANPEAAASMKQLFSL<br>AAGSQASDGGSSSS<br>TADGIKTSNGFDQPT<br>LANFTSSTAVVTDLG<br>VVGRGIKRAEPVAVV<br>PAGIVNSSQPSKKRSF |

|                |        |               |      |                                                                                                                                                                                                                                                                                                                                                                                                                                                                                                                                                 |
|----------------|--------|---------------|------|-------------------------------------------------------------------------------------------------------------------------------------------------------------------------------------------------------------------------------------------------------------------------------------------------------------------------------------------------------------------------------------------------------------------------------------------------------------------------------------------------------------------------------------------------|
| -              | PpNASP | P. polyceph   | NASP | NTTTTTTTTSTTSPO<br>ETAVEAGASSEPKEL<br>TPEEAAKYEEAKLF<br>NEDKYAEASDLFADV<br>LTHKVAVHGLGLEC<br>AECYFLYGKCLFLQAK<br>AESSVFGPTAQKIN<br>EDDEDSSDEEDVPPV<br>GEGGEKTEGKELEEK<br>PEDVENTQVAVETLE<br>VARLIVEKHPEKAAEL<br>SDTRYALAEIFLETDN<br>CNDIAIEEFKCCVSLRE<br>SIFVPNDRRIAEAHYH<br>LGLAYFSTDRPADAH<br>FHYSKAADVLDKSLKS<br>LPPGSAEIEDIKSILED<br>LAAKMEEVDPSLLAK<br>EKEATENAINGTNG<br>KGKAPVSSSSSAPPS<br>SFPKEETGFAAPIFDK<br>TQPVTRFGVVGSSVK<br>RATPVTASSSSSSSS<br>SSSSTPSAFQJASASS<br>SSSSSSTTPSPAPRP<br>ALSSSGEKRKLEDIMG<br>GEEGFERTKTQDTV<br>CETRT   |
| NP_013078.1    | ScHif1 | S. cerevisiae | NASP | MKLRAEDVLANGTSR<br>HKVQIDMERQVQIA<br>KDLLAQKKFLEAAKR<br>CQQTLDLSPKDGLLP<br>DPELFTFAQAVNYM<br>EVQNSGNLFGDALLA<br>GDDGSGSESESEPES<br>DVSNGEEGNENGQT<br>EIPNSRMFQDQEEE<br>DLTGDDVDSGSDSDSG<br>EGSEEEENVEKEER<br>LALHELANSFPAHEH<br>DDEIEDVSLRKSFG<br>HIYFENDLYENALDLL<br>AQALMLLGRPTADG<br>QSLTENSRLRIGDVVIL<br>MGDIEREAEAMFSRAI<br>HHYKALGYKTLKPA<br>EQVTEKVIQAEFLVCD<br>ALRWVDQVPAKDKL<br>KRFXHAKALLEKMT<br>TRPKDSELQARLAQ<br>IQDDIDEVQENQQH<br>GSKRPLSQPTTSIGFP<br>ALEKPLGDFNDLSQL<br>VKKKPRRH                                                  |
| XP_001030823.3 | TtNASP | T. thermophi  | NASP | EITKEQKILDKEENG<br>QNNLNDEGSRNQEE<br>AEEITKILKESSKVSE<br>KYLESRLEAVECYKN<br>KNFDQAENIFSDLMI<br>YAVKFYKSETHVKMS<br>KYFFFGDMLLSKLEN<br>NPDVFGDKAQKKLD<br>NQTTVEVEKNPNQM<br>ASEEASEQKMVAQK<br>EQKEEEDNEESQS<br>QGEEFIVQLDTVIFKD<br>ENVEIRDETAPQNN<br>EENQTEENNLPIGKV<br>TMEKSDPIDDLQLA<br>WENLESRKIYNQELL<br>QLQDSQEDRKEKQI<br>QVKKQIVEVTLRIADL<br>EQWRDNFSDALKEYT<br>MALQLSKEIEDREYSR<br>TLSSIFFQLGNAVLYE<br>NKEYCEEEGLKNFDS<br>AQILENCLSKIAIPPQ<br>ELPSFKILKKDDIKVD<br>HLKHSFLDDDESKEIK<br>DTLKVLYEKIEDTLIQR<br>DERDKYKAYQELMKK<br>QSQNQNQFAQPSQ |

|                |         |           |      |                                                                                                                                                                                                                                                                                                                                                                                                                                                                                                                                                    |
|----------------|---------|-----------|------|----------------------------------------------------------------------------------------------------------------------------------------------------------------------------------------------------------------------------------------------------------------------------------------------------------------------------------------------------------------------------------------------------------------------------------------------------------------------------------------------------------------------------------------------------|
|                |         |           |      | DTATAPSTSADKADG<br>MDIDTEAKRLMGAG<br>QRHLVMKDVRSVTS<br>FQEASSLLAKYGETA<br>DECAEAFYSYGTSLLE<br>LARMENGVLGNALE<br>GMPEDDEEGEKEEDA<br>NIPADNLDEKEREQL<br>RDQVYDAMAEERA<br>PKETSESEALGKPKDE<br>SKPMDTDEQNKPVE<br>DKMKNGNMETGKV<br>TDGLKLESVNRDVSIM<br>DESEKGEVPESKNAP<br>TPGEHTEQKEKSEPKE<br>SKAPEKKDTKDTANQ<br>SPDSTEVAEERAHTD<br>TAEKMDSEASAKTEE<br>GASKTPTGNEASKSE<br>DPEKMGEEEEEGEDS<br>EESEENESTEEKETED<br>EDVGNLQLAWEMLD<br>LSKMIFKRQKSREAQ<br>LKAAQAHKLGEVST<br>ESENYAQAVEDFLAC<br>LDIQKEHLEEHDRLLA<br>ETHYHLGLAYQYSSK<br>HEEAISHFTQSVGVIE      |
| NP_001089907.1 | XINASPL | X. laevis | NASP |                                                                                                                                                                                                                                                                                                                                                                                                                                                                                                                                                    |
|                |         |           |      | PQAPPPPDTEPTAA<br>PGEAEDEPQTLERAQ<br>ELFDRGSKAIEDEDV<br>DAVDCLSRALAIRASH<br>YGEIAPCASTYFKYG<br>CALLYKAQEEEDVLG<br>NVPKSLPNEDSVKST<br>ATKDDSGTSKVSMTD<br>AEDAASSEKVDAAEG<br>HNSNGKNQENGNG<br>EVEKDDDDVDDEK<br>MGDEEDNDLDSWK<br>MLDIARAIVEKSQDN<br>TMEKVKIYSALAEVAT<br>EREDMDNSLSQYMK<br>ALSMLEHLVEPDHRR<br>VVLENFRLCLVYELVS<br>KIGEAIYCAKAIKSLCK<br>SRIQSLKSSKDALLAGI<br>DGDASAAEAEAGGSEK<br>SAIEKELEQLTSILPDL<br>EKKLEDLSEANPSAD<br>MDENVKAIVSRVTD<br>VMPKAASFSSQMA<br>TSSNGFDSSVMSTAE<br>ASNELASSRLLNLLLR<br>NLHLIHHLNKVTAAS<br>TLRLFLQRRLETSQYLS |
| A0A804MWY6     | ZmNASP  | Z. mays   | NASP |                                                                                                                                                                                                                                                                                                                                                                                                                                                                                                                                                    |



**Table S4: List of primers**

| Primer ID | Sequence               | Gene  |
|-----------|------------------------|-------|
| HIRA_F    | GTGAATGGATTGCAGGTGCC   | HIRA  |
| HIRA_R    | GTGGGAGGGATGAACACAGG   | HIRA  |
| NASP_F    | GTACCACCAGTTGGTGAGGG   | NASP  |
| NASP_R    | CCGCTTTTTCAGGGTGCTTC   | NASP  |
| CAF1C_F2  | ATTTTGCTTCTGCTGGCGAC   | CAF1C |
| CAF1C_R2  | AAACGGGTAAAAGCCACGC    | CAF1C |
| 19S_QF    | CAACGGGTACAGAGGATAAGGG | 19S   |
| 19S_QR    | ATTCATATGTCCCCTAACGCCC | 19S   |

Table S5: Prediction of NLS signals in chaperone proteins.

| Physarum Histone chaperone | Probability | Start | End  | Signal Sequence                                                                                                           |
|----------------------------|-------------|-------|------|---------------------------------------------------------------------------------------------------------------------------|
| PpASF1                     |             |       |      | This protein has no NLS predicted by NLStradamus                                                                          |
| PpMCM2                     | 0.792       | 115   | 125  | KKRNRKVQAK                                                                                                                |
|                            | 0.744       | 148   | 154  | KPRRRP                                                                                                                    |
|                            | 1.000       | 378   | 399  | KKKKKKKKKKKKKKKKRSK                                                                                                       |
| PpHSP90                    | 0.879       | 244   | 251  | KKKKKKVK                                                                                                                  |
| PpHSC70                    |             |       |      | This protein has no NLS predicted by NLStradamus                                                                          |
| PpIPO4                     |             |       |      | This protein has no NLS predicted by NLStradamus                                                                          |
| PpSPT6                     | 0.998       | 63    | 74   | REKKKKKKKKR                                                                                                               |
|                            | 0.996       | 122   | 136  | GGGGERRRRKKRR                                                                                                             |
|                            | 0.706       | 171   | 179  | NKNSKLLR                                                                                                                  |
|                            | 0.643       | 240   | 245  | KRSKQR                                                                                                                    |
| PpAPLF                     | 0.837       | 25    | 35   | KKEKEKEKKKG                                                                                                               |
|                            | 0.773       | 205   | 228  | RGEKGEEGEGEESPEKKGVRK                                                                                                     |
|                            | 0.911       | 309   | 347  | KPKTPKSKNSTPEKDAEIAKLQEKYNKESGGGGKKKRK                                                                                    |
|                            | 0.889       | 362   | 372  | KVKKQKKGKKG                                                                                                               |
|                            | 0.961       | 405   | 419  | KNKKNKKKGASPKP                                                                                                            |
| PpPolE3                    | 0.743       | 114   | 124  | EKKEKGDK                                                                                                                  |
| PpSWR1                     | 0.808       | 1567  | 1575 | REKRERKKH                                                                                                                 |
|                            | 0.817       | 1590  | 1618 | MPTKGGRGRKANGGLFPSRIVPKTARDGK                                                                                             |
|                            | 0.779       | 1980  | 1992 | KPSPSKRSKNAE                                                                                                              |
| PpSWC2                     | 0.992       | 79    | 107  | KEKKEKKRMAYVDPKAKKGPKRRKIQDKA                                                                                             |
|                            | 0.990       | 137   | 155  | APKAEPKKGRRRKKTPK                                                                                                         |
|                            | 0.893       | 200   | 219  | REKEREETEKKRSQRSRKRS                                                                                                      |
| PpSPT16                    | 0.744       | 494   | 509  | QKGSKGSSEDKIKKHQ                                                                                                          |
| PpPob3                     | 0.996       | 503   | 528  | KPKKDKHEGKRKKSDGEEKPKKKKA                                                                                                 |
| PpSET                      |             |       |      | This protein has no NLS predicted by NLStradamus                                                                          |
| PpNAP1L1                   | 0.964       | 231   | 245  | KQTKKTKAKGKKPA                                                                                                            |
|                            | 0.685       | 345   | 353  | KRGGRQGG                                                                                                                  |
| PpCAF1A                    | 0.994       | 143   | 264  | KPSPKKRKLSPEEKQAREDAKKAKEEERKLQAKQREDAKNKKEEEKRLLALAREEEKKRDEEKRVKDQAKEEARLKKEAEKKARDDAKLQKDLEKKAKEEARLQKLQEKQKQEEEEERKKE |
|                            | 0.982       | 345   | 359  | GKRNKRDKKRAEK                                                                                                             |
|                            | 0.850       | 499   | 513  | HMERDGTKREKREKK                                                                                                           |
| PpCAF1B                    | 0.677       | 194   | 201  | LPKNKKSH                                                                                                                  |
|                            | 0.704       | 283   | 296  | EKEKEESGKGKEKE                                                                                                            |
| PpCAF1C                    |             |       |      | This protein has no NLS predicted by NLStradamus                                                                          |
| PpHIRA                     | 0.999       | 599   | 669  | TKKHKKDEESDKEKGKEAEKGDKNKDIEADHTKEKEREKERDKREKERRRREKEKEKEKVRKEKEKERE                                                     |
| PpUBN                      | 0.717       | 190   | 194  | RKKKR                                                                                                                     |
|                            | 0.999       | 204   | 283  | DNKSKRTKKLIEDEKGSPEKDKKNDENGKSKDKKPKDKKKEETPKDKEKKEDSTKDEKKKEDPGKEKEKKKEEK                                                |
|                            | 0.605       | 525   | 525  | K                                                                                                                         |
|                            | 0.981       | 615   | 644  | KIKKEKAKNGEKAAGPGGAKPAKVYSRKK                                                                                             |
| PpCABIN1                   |             |       |      | This protein has no NLS predicted by NLStradamus                                                                          |
| PpNASP                     |             |       |      | This protein has no NLS predicted by NLStradamus                                                                          |



**Table S6: Prediction of NES signals in chaperone proteins.**

| Physarum Histone chaperone | Score | Start | End  | Signal Sequence          | number of matches for the NES |
|----------------------------|-------|-------|------|--------------------------|-------------------------------|
| PpCabin1                   | 100.0 | 766   | 778  | QT-L-GVS-L-ST-L-N-L-Q    | 1                             |
| PpIPO4                     | 75.0  | 566   | 581  | DA-M-SLA-L-AG-L-E-L-GFSE | 1                             |
| PpSPT6                     | 73.6  | 1216  | 1230 | EE-L-KK-L-NKF-L-V-I-ELE  | 4                             |
| PpCAF1A                    | 70.2  | 522   | 534  | SS-A-KAI-L-TN-L-S-I-O    | 2                             |
| PpSWR1                     | 64.9  | 1764  | 1779 | DV-L-AL-I-SQR-V-V-L-TMPQ | 1                             |
| PpSPT6                     | 61.1  | 634   | 647  | Q-M-ED-F-QML-L-V-L-KAE   | 1                             |
| PpSPT6                     | 61.1  | 959   | 972  | S-L-QY-V-SG-L-G-V-RKAE   | 1                             |
| PpSPT16                    | 56.2  | 839   | 854  | SL-I-EPP-F-FV-L-T-L-KEIE | 2                             |
| PpSPT16                    | 56.2  | 106   | 121  | EN-A-PYV-L-CF-L-Q-L-SKAE | 1                             |
| PpMCM2                     | 56.2  | 557   | 568  | S-A-VG-L-TAA-V-R-I-D     | 1                             |
| PpSPT6                     | 56.2  | 1308  | 1319 | S-A-RS-L-GS-L-F-I-GE     | 1                             |
| PpCABIN1                   | 51.8  | 157   | 170  | S-I-DK-L-AEV-L-F-I-LGD   | 1                             |
| PpPob3                     | 51.8  | 84    | 97   | DV-L-KTF-L-SEN-F-H-V-E   | 1                             |
| PpNASP                     | 51.8  | 204   | 217  | DA-I-EE-F-KKC-V-S-L-RE   | 1                             |
| PpMCM2                     | 49.2  | 262   | 274  | Q-I-FDE-V-AMK-L-V-L-E    | 1                             |
| PpSPT6                     | 48.7  | 474   | 489  | ED-L-SD-L-QDY-F-Q-M-FYAD | 2                             |
| PpPob3                     | 46.4  | 114   | 125  | EL-A-GP-V-IT-L-A-V-D     | 1                             |
| PpMCM2                     | 43.9  | 878   | 891  | QL-L-FH-I-LT-M-E-V-REO   | 2                             |
| PpSPT16                    | 41.2  | 324   | 336  | S-I-KPG-V-KIS-V-I-M-D    | 1                             |
| PpMCM2                     | 39.8  | 656   | 670  | DP-I-LSR-F-DI-M-C-V-VRD  | 2                             |
| PpCAF1A                    | 20.3  | 6     | 18   | S-I-YLC-L-VWA-V-F-M-D    | 1                             |
| PpASF1                     | NA    |       |      |                          |                               |
| PpSET                      | NA    |       |      |                          |                               |
| PpNAP1L1                   | NA    |       |      |                          |                               |
| PpSWC2                     | NA    |       |      |                          |                               |
| PpPolE3                    | NA    |       |      |                          |                               |
| PpHSP90                    | NA    |       |      |                          |                               |
| PpHSC70                    | NA    |       |      |                          |                               |
| PpCAF1B                    | NA    |       |      |                          |                               |
| PpCAF1C                    | NA    |       |      |                          |                               |
| PpHIRA                     | NA    |       |      |                          |                               |
| PpUBN                      | NA    |       |      |                          |                               |

**Table S2:** RNA-Seq data for histone chaperones during the cell cycle. Normalized read count are presented in TPM.

| Physarum Encoded Protein | Physarum Transcript ID | Average early S-phase | SEM early S-phase | Average mid S-phase | SEM mid S-phase  | Average late S-phase | SEM late S-phase | Average early G2-phase | SEM early G2 phase | Average late G2-phase | SEM late G2-phase |
|--------------------------|------------------------|-----------------------|-------------------|---------------------|------------------|----------------------|------------------|------------------------|--------------------|-----------------------|-------------------|
| PpASF1                   | c_ppoly_21148          | 1685.64018535042      | 382.571302686029  | 1059.9304195573     | 492.595273451016 | 362.802070527273     | 108.002266976866 | 524.77419380426        | 121.605051084244   | 1935.94237626234      | 220.851430113619  |
| PpMCM2                   | c_ppoly_24879          | 348.316651403373      | 107.612867406748  | 30.736854935386     | 6.7519544495917  | 18.0262054632708     | 9.33210563139798 | 19.6441524563809       | 8.78750018426791   | 320.298470991307      | 83.2392746707242  |
| PpIPO4                   | c_ppoly_21477          | 500.0753411145        | 155.059505888504  | 285.169396424205    | 125.5775857642   | 300.045891422379     | 44.5007710355702 | 440.72913492516        | 226.920583929418   | 320.56752056917       | 99.5996768964357  |
| PpPT6                    | c_ppoly_23850          | 946.221323399772      | 267.782426259667  | 801.75039129217     | 196.592902112129 | 796.128154000321     | 225.869751198728 | 883.769437899125       | 418.910375801823   | 535.910510796423      | 108.739600667991  |
| PpPolE3                  | c_ppoly_20662          | 498.946034384142      | 84.3251390005563  | 369.130590586745    | 20.427037370197  | 38.8726987573958     | 19.8434389071508 | 60.3746550698003       | 16.3747911981762   | 730.295813248133      | 202.149890161534  |
| PpHSP90                  | c_ppoly_11600          | 20007.6443158073      | 6426.45272292963  | 9734.37029857941    | 5156.02179431029 | 15770.1416854257     | 265.79873656357  | 8178.16622784559       | 1159.11881355825   | 15918.9721285622      | 4950.54779397259  |
| PpHSC70                  | c_ppoly_14645          | 23225.7456694507      | 3247.06191059978  | 9646.97444768135    | 3701.48661572195 | 24989.3498155015     | 9841.83672566814 | 17255.8499772107       | 5068.55676580514   | 18211.4644589064      | 3051.81467142549  |
| PpNASP                   | c_ppoly_25875          | 1629.35403343165      | 620.414116060328  | 363.899319613087    | 209.842458800485 | 100.358580632022     | 49.2779416872384 | 135.875297632927       | 63.9403874024608   | 922.890744802152      | 440.673737748532  |
| PpCAF1A                  | c_ppoly_04687          | 597.254804471717      | 120.092250699239  | 62.1585607690401    | 23.4137215227569 | 26.8581363237992     | 13.1076862635872 | 28.3681013175196       | 14.1973006626964   | 434.341742433927      | 99.4410586715044  |
| PpCAF1B                  | c_ppoly_07527          | 750.710058213592      | 233.916619770675  | 183.331866595398    | 79.089799099446  | 14.2463273177883     | 7.9155809639024  | 6.39873554427367       | 2.74463936330242   | 493.114229648283      | 97.6520207782227  |
| PpCAF1C                  | c_ppoly_21398          | 2501.2459346085       | 578.127883384376  | 3371.9451619237     | 764.048482179825 | 1943.08803111066     | 509.35511092029  | 2459.11637656382       | 271.929299332971   | 2379.00764440829      | 288.673270974413  |
| PpHIRA                   | c_ppoly_12971          | 989.598820352507      | 140.79766480616   | 1160.8239286344     | 197.737924512506 | 1212.72394731905     | 452.371827102978 | 1134.73843959412       | 334.63691041208    | 760.968307356968      | 70.766415233273   |
| PpUBN                    | c_ppoly_06650          | 378.743171268866      | 88.0311047036758  | 688.542276271353    | 26.190024394418  | 682.568343394393     | 262.45494895959  | 509.773405608509       | 70.615779913131    | 539.487296205266      | 90.4127318057242  |
| PpCABIN1                 | c_ppoly_25516          | 305.317386411327      | 108.982428985004  | 123.793553723011    | 34.3114249875473 | 87.3060935803543     | 30.8516180968159 | 113.957483964267       | 47.5692809749332   | 182.024985513339      | 30.267088246206   |
| PpPLF                    | c_ppoly_14659          | 602.253242194539      | 117.392752510644  | 696.635847592961    | 119.153243588837 | 567.470471090983     | 141.273674480576 | 594.889695389578       | 192.973403903031   | 463.49685999437       | 45.6443812599786  |
| PpSWR1                   | c_ppoly_23444          | 646.256991190687      | 44.8386018649976  | 524.264004191157    | 114.675703587593 | 750.759297095279     | 200.595591582832 | 809.632893598996       | 283.378733605977   | 445.385395046608      | 51.3320997499832  |
| PpSWC2                   | c_ppoly_14213          | 76.3530595685763      | 12.1138778936789  | 287.056516156046    | 60.1224577135304 | 192.637043757318     | 24.4457821070988 | 121.082884673759       | 7.89472148236264   | 104.872094197058      | 8.93252644801636  |
| PpSPT16                  | c_ppoly_05072          | 1636.36073180243      | 303.322016727763  | 1199.89815004542    | 384.411533528417 | 599.80583751488      | 39.3030725590596 | 882.275887448549       | 206.48198026475    | 1607.57888712835      | 223.137688211474  |
| PpPob3                   | c_ppoly_22049          | 2229.8086235541       | 570.071074636041  | 834.499671535581    | 296.684402950269 | 485.228384979042     | 144.516443107806 | 908.926892518441       | 279.746447641578   | 2779.57096039765      | 400.016961261955  |
| PpNAP1L1                 | c_ppoly_06693          | 13756.1314103008      | 3384.84587293737  | 15303.6934508884    | 3841.67850719629 | 13997.2210675457     | 2383.26933024534 | 13826.715003288        | 3013.02502051686   | 10769.7059192618      | 2239.71095674852  |
| PpSET                    | c_ppoly_06196          | 3864.36061664834      | 508.320802019727  | 7191.29184354547    | 2647.07569765998 | 4959.35118588884     | 732.62386714741  | 4791.89302691023       | 777.030852241146   | 4052.06069090031      | 209.40628677767   |
| PpHT01                   | c_ppoly_11752          | 224.696253946371      | 64.0543175847619  | 82.1480278004567    | 36.0232191739293 | 56.8407614086324     | 17.1144801265771 | 31.3177687480039       | 14.1154140043007   | 201.232068992229      | 82.272118714642   |
| PpHTA2                   | c_ppoly_09597          | 915.261558275856      | 157.750403876033  | 597.704488201613    | 74.6491583767923 | 540.232443693337     | 71.0450192193106 | 478.278797518563       | 94.3203004094633   | 919.533399670732      | 293.589766273955  |
| PpHTA3                   | c_ppoly_08402          | 12768.2104766242      | 1764.19512439209  | 19699.028596941     | 8527.599947596   | 6298.59967750296     | 1310.2571828244  | 5418.08853376133       | 756.639194212458   | 13212.4754814818      | 1176.4678460523   |
| PpHTB1                   | c_ppoly_07519          | 516.711905099623      | 73.1012567019167  | 286.04909909138     | 59.1602429755268 | 311.385778068313     | 141.223766772719 | 247.940835274094       | 72.7312655722548   | 437.695433961764      | 144.971408575862  |
| PpHTB2                   | c_ppoly_07520          | 19591.0487732844      | 3852.84466629448  | 19477.6081457671    | 7330.41880876511 | 5953.18640798085     | 1305.43618961695 | 6995.68294236743       | 947.448208448614   | 29290.2210913313      | 9024.79107813862  |
| PpHTT1                   | c_ppoly_23074          | 362.936493621585      | 30.7899100607491  | 184.837175371919    | 54.7652150451114 | 175.238136352701     | 72.839740023364  | 78.117185948318        | 8.82195351238481   | 343.537584809706      | 114.774352425865  |
| PpHTT2                   | c_ppoly_07595          | 245.457643975657      | 71.5039049378998  | 228.797500426871    | 64.5931817164329 | 170.908285886344     | 106.117662637738 | 509.168664755438       | 289.786224425149   | 552.733119862111      | 246.6473716141    |
| PpHTT3                   | c_ppoly_07042          | 813.285604922061      | 93.9522087593013  | 354.217927444129    | 51.6391828541076 | 311.668949854076     | 106.117662637738 | 509.168664755438       | 289.786224425149   | 552.733119862111      | 246.6473716141    |
| PpHTT4                   | c_ppoly_00698          | 9895.6108639726       | 724.633057838997  | 19329.1179871322    | 5883.7362724994  | 12788.8950614719     | 1092.30683795137 | 11143.0920774536       | 466.57600829916    | 9981.80779712691      | 319.802030472577  |
| PpHTT5                   | c_ppoly_10421          | 29.3192111194444      | 8.99358097544886  | 176.432671524867    | 37.6843272724607 | 84.3202148809206     | 9.232765909262   | 34.7932332606828       | 9.39613097875041   | 41.1153001275873      | 7.74354993753454  |
| PpHTF1                   | c_ppoly_07791          | 3084.03601807698      | 576.640520811421  | 3191.90476212654    | 212.242124852856 | 3038.563595261       | 1064.27838964211 | 2143.55897320622       | 553.386093720452   | 4777.70786964036      | 1177.45821282105  |
| PpHTF2                   | c_ppoly_15298          | 771.495274942455      | 189.771049071911  | 574.531486893002    | 50.5536608956485 | 548.0011158296472    | 39.0745859034198 | 389.985749592906       | 47.1831650477286   | 844.051363434518      | 374.735789162973  |

Table S8: RNA-Seq file details.

| Sample Name | cell cycle phase | Sequence <b>17</b> | Sequence <b>i5</b> | R1 file Name                                   | R2 file Name                                   |
|-------------|------------------|--------------------|--------------------|------------------------------------------------|------------------------------------------------|
| S4          | early S-phase    | TCCGGAGA           | TATAGCCT           | S4_TCCGGAGA-AGGCTATA-AHFMH7DRXY_L001_R1.fastq  | S4_TCCGGAGA-AGGCTATA-AHFMH7DRXY_L001_R2.fastq  |
| S13         | early S-phase    | TCCGGAGA           | ATAGAGGC           | S13_TCCGGAGA-GCCTCTAT-AHFMH7DRXY_L001_R1.fastq | S13_TCCGGAGA-GCCTCTAT-AHFMH7DRXY_L001_R2.fastq |
| S24         | early S-phase    | TCCGGAGA           | CCTATCCT           | S24_TCCGGAGA-AGGATAGG-AHFMH7DRXY_L001_R1.fastq | S24_TCCGGAGA-AGGATAGG-AHFMH7DRXY_L001_R2.fastq |
| S6          | mid S-phase      | CGCTCATT           | TATAGCCT           | S6_CGCTCATT-AGGCTATA-AHFMH7DRXY_L001_R1.fastq  | S6_CGCTCATT-AGGCTATA-AHFMH7DRXY_L001_R2.fastq  |
| S16         | mid S-phase      | CGCTCATT           | ATAGAGGC           | S16_CGCTCATT-GCCTCTAT-AHFMH7DRXY_L001_R1.fastq | S16_CGCTCATT-GCCTCTAT-AHFMH7DRXY_L001_R2.fastq |
| S7          | late S-phase     | GAGATTCC           | TATAGCCT           | S7_GAGATTCC-AGGCTATA-AHFMH7DRXY_L001_R1.fastq  | S7_GAGATTCC-AGGCTATA-AHFMH7DRXY_L001_R2.fastq  |
| S18         | late S-phase     | GAGATTCC           | ATAGAGGC           | S18_GAGATTCC-GCCTCTAT-AHFMH7DRXY_L001_R1.fastq | S18_GAGATTCC-GCCTCTAT-AHFMH7DRXY_L001_R2.fastq |
| S28         | late S-phase     | GAGATTCC           | CCTATCCT           | S28_GAGATTCC-AGGATAGG-AHFMH7DRXY_L001_R1.fastq | S28_GAGATTCC-AGGATAGG-AHFMH7DRXY_L001_R2.fastq |
| S10         | early G2 phase   | ATTCAGAA           | TATAGCCT           | S10_ATTCAGAA-AGGCTATA-AHFMH7DRXY_L001_R1.fastq | S10_ATTCAGAA-AGGCTATA-AHFMH7DRXY_L001_R2.fastq |
| S20         | early G2 phase   | ATTCAGAA           | ATAGAGGC           | S20_ATTCAGAA-GCCTCTAT-AHFMH7DRXY_L001_R1.fastq | S20_ATTCAGAA-GCCTCTAT-AHFMH7DRXY_L001_R2.fastq |
| S29         | early G2 phase   | ATTCAGAA           | CCTATCCT           | S29_ATTCAGAA-AGGATAGG-AHFMH7DRXY_L001_R1.fastq | S29_ATTCAGAA-AGGATAGG-AHFMH7DRXY_L001_R2.fastq |
| S2          | late phase       | ATTACTCG           | TATAGCCT           | S2_ATTACTCG-AGGCTATA-AHFMH7DRXY_L001_R1.fastq  | S2_ATTACTCG-AGGCTATA-AHFMH7DRXY_L001_R2.fastq  |
| S12         | late phase       | ATTACTCG           | ATAGAGGC           | S12_ATTACTCG-GCCTCTAT-AHFMH7DRXY_L001_R1.fastq | S12_ATTACTCG-GCCTCTAT-AHFMH7DRXY_L001_R2.fastq |
| S22         | late phase       | ATTACTCG           | CCTATCCT           | S22_ATTACTCG-AGGATAGG-AHFMH7DRXY_L001_R1.fastq | S22_ATTACTCG-AGGATAGG-AHFMH7DRXY_L001_R2.fastq |
